# Supplementary material for: Serum ferritin associated with atherogenic lipid profiles in a high-altitude living general population
Source: PeerJ. 2025 Mar 24;13:e19104. doi: 10.7717/peerj.19104 (PMC11949108; doi:10.7717/peerj.19104)
Supplement: Supplemental Information 4 [file peerj-13-19104-s004.xlsx]

## Sheet: Sheet1
Gender(1=men, 2=women)	Age	Systolic blood pressure 1	Diastolic blood pressure 1	Systolic blood pressure 2	Diastolic blood pressure 2	Average systolic blood pressure	Average diastolic blood pressure	Height（cm）	Weight (kg)	Waist circumference（cm）	BMI（kg㎡）	Heart rate (times/min)	CHO（mgdl）	CRE（μmoIL）	GLU（mgdl）	HDLC（mgdl）	LPA（mgL）	TG（mgdl）	UA（μmolL）	APOA（gL）	APOB（gL）	CRP（mgL）	CRP quartile	DD（mgL）	FERR（ngmL）	FERR quartile	HCY（μmolL）	SAA（mgL）	SAA quartile	sdLDL（mgL）	high sdLDL (1=yes, 0=no)	CHO (mmolL)	TG (mmolL)	LDL-C (mmolL)	HDLC (mmolL)	LDL-C (mgldL)	Glucose (mmol)	History of hypertension (1=yes, 0=no)	Dyslipidemia (1=yes, 0=no)	History of diabetes (1=yes, 0=no)	Hypertension (1=yes, 0=no)	Diabetes (1=yes, 0=no)	Smoking (1=yes, 0=no)	Drinking (1=yes, 0=no)	Hemoglobin (g/L)	White blood cells	Platelet	High TC (1=yes, 0=no)	High LDL-C (1=yes, 0=no)
1	42	108	61	107	57	107.5	59	174	66	176	21.8	66	163.56	81	92.08	52.07	152.7	57.38	313	1.24	0.7	4.65	3	0.11	649.7	2	17.39	5	2	29.26	0	4.23073	0.64763	2.58702	1.34687	100.014	5.11101	0	0	0	0	0	0	0	171	7.93	231	0	0
2	39	104	56	105	64	104.5	60	161	45	70	17.36	69	154.07	54	88.12	58.52	54.6	53.78	238	1.27	0.63	3.37	2	0.29	22.6	2	11.25	6.9	3	20.79	0	3.98526	0.606998	2.19333	1.51371	84.794	4.89121	0	0	0	0	0	0	0	155	5.95	274	0	0
1	57	94	72	113	63	103.5	67.5	173	60	78	20.05	94	159.16	69	82.92	54.13	86.9	71.59	372	1.31	0.68	0.65	1	0.28	26	1	20.76	7.7	4	32.91	0	4.11692	0.808014	2.3464	1.40016	90.712	4.60258	0	0	0	0	0	0	0	123	5.15	196	0	0
1	58	178	104	177	108	177.5	106	173	59	82	19.71	70	107.66	85	104.31	37.25	19.3	106.14	263	1.11	0.51	4.93	3	0.28	357.9	4	19.36	5	2	24.02	0	2.78479	1.19797	1.27217	0.963528	49.182	5.78985	0	1	0	1	0	0	0	172	7.95	215	0	0
2	45	113	71	127	74	120	72.5	166	50	72	18.14	68	187.17	49	74.83	58.54	49.1	70.39	260	1.29	0.77	4.62	3	0.18	87.3	3	18.32	4.9	2	35.91	0	4.84144	0.79447	2.96306	1.51423	114.552	4.15353	0	0	0	0	0	0	0	196	5.53	227	0	0
1	67	231	110	191	105	211	107.5	166	55	72	19.96	76	136.64	93	162.75	57.15	20.9	83.26	282	1.27	0.54	4.36	3	0.33	300.3	3	22.72	4.6	1	20.5	0	3.5344	0.939729	1.6254	1.47827	62.838	9.03364	0	0	0	1	1	0	0	174	6.83	170	0	0
2	38	102	61	103	55	102.5	58	164	42	60	15.62	69	154.38	65	85.42	59.56	75.1	40.75	278	1.22	0.66	1.56	1	0.28	19.6	2	13.7	10.9	4	24.12	0	3.99327	0.459932	2.24185	1.54061	86.67	4.74134	0	0	0	0	0	0	0	187	4.41	207	0	0
2	51	128	75	119	66	123.5	70.5	163	65	83	24.46	69	168.31	65	83.2	58.3	46.9	74.83	339	1.29	0.69	4.73	3	0.48	0.5	1	14.91	5.4	2	32.35	0	4.3536	0.844582	2.45846	1.50802	95.044	4.61812	0	0	0	0	0	0	0	178	7.12	226	0	0
2	67	154	104	171	89	162.5	96.5	165	49	69	18	83	207.46	54	83	89.64	439	47.74	246	1.85	0.77	3.88	2	0.67	213.3	4	20.72	4.6	1	29.45	0	5.36627	0.538826	2.80062	2.31868	108.272	4.60702	1	0	0	1	0	0	0	160	6.38	212	0	0
1	50	124	88	138	80	131	84	175	79	92	25.8	77	180.63	96	83.87	46.52	45.3	109.9	352	1.2	0.77	1.11	1	0.48	219	3	21.56	5.1	2	44.47	0	4.67227	1.24041	2.90041	1.20331	112.13	4.65531	0	0	0	0	0	0	0	182	7.12	255	0	0
2	44	109	64	132	64	120.5	64	149	54	76	24.32	65	143.07	68	80.02	75.38	36.3	35.79	277	1.62	0.52	2.74	1	0.42	63.6	3	16.34	7	3	15.52	0	3.70072	0.40395	1.56575	1.94982	60.532	4.44161	0	0	0	0	0	0	0	159	7.74	216	0	0
2	32	117	67	109	81	113	74	161	53	69	20.45	72	147.71	55	92.83	50.7	284.3	65.9	229	1.28	0.63	5.83	4	0.18	4.9	1	13.43	4.6	1	26.57	0	3.82074	0.743792	2.16839	1.31143	83.83	5.15264	0	0	0	0	0	0	0	124	5.32	169	0	0
1	49	111	60	126	64	118.5	62	175	88	99	28.73	65	227.08	87	75.89	46.12	61	91.29	383	1.31	1.09	4.46	3	0.54	313.2	4	21.16	6.8	4	67.18	1	5.87377	1.03036	4.20854	1.19296	162.702	4.21237	0	1	0	0	0	0	0	192	11.15	209	0	1
2	58	164	98	169	89	166.5	93.5	151	61	90	26.75	93	137.24	80	94.7	41.88	116.3	85.53	353	1.08	0.56	24.98	4	0.42	182.3	4	23.96	59	4	19.49	0	3.54992	0.96535	2.02416	1.08329	78.254	5.25644	1	0	0	1	0	0	0	174	6.34	123	0	0
1	58	134	75	137	84	135.5	79.5	159	60	81	23.73	80	214.8	64	97.97	44.94	345.5	116.1	361	1.08	0.98	5.03	3	0.35	165.8	2	16.16	4.7	1	54.83	1	5.55613	1.31038	3.79307	1.16244	146.64	5.43794	0	0	0	0	0	0	0	182	7.71	223	0	0
2	71	147	79	146	79	146.5	79	157	52	88	21.1	77	253.82	63	96.85	67.36	181.3	58.86	358	1.73	1.02	18.98	4	0.38	90.3	3	18.91	10.9	4	54.2	1	6.56544	0.664334	4.51857	1.74237	174.688	5.37578	0	1	0	1	0	0	0	154	7.71	292	1	1
2	66	163	85	154	83	158.5	84	156	51	75	20.96	76	21.69	1	7.51	4.83	68	7.07	46	0.03	0.17	6.02	4	0.04	22.1	2	2.33	3.6	1	3.7	0	0.561045	0.0797968	0.399534	0.124935	15.446	0.416852	1	1	0	1	0	0	0	155	5.02	201	0	0
2	43	139	88	147	85	143	86.5	136	62	88	25.28	77	196.92	53	81.92	44.99	45.9	119.35	363	1.14	0.84	0.33	1	0.29	312.6	4	13.7	5.8	3	40	0	5.09364	1.34707	3.31247	1.16374	128.06	4.54707	1	0	0	1	0	0	0	182	7.56	181	0	0
1	52	123	72	122	67	122.5	69.5	172	56	72	18.93	57	178.2	80	84.56	44.45	135.7	43.75	297	1.11	0.82	5.8	4	0.16	126.4	1	19.05	4.4	1	38.95	0	4.60942	0.493792	3.23332	1.14977	125	4.69361	0	0	0	0	0	0	0	186	5.25	153	0	0
1	50	131	79	118	80	124.5	79.5	169	76	93	26.61	70	0.28	4	0.05	0.09	2.8	1.64	24	0.12	0.05	6.31	4	0.07	4.4	1	0.47	3.6	1	0.23	0	0.00724263	0.0185102	-0.00356958	0.00232799	-0.138	0.00277531	0	1	0	0	0	0	0	196	4.79	213	0	0
2	59	130	77	135	76	132.5	76.5	151	51	83	22.37	66	196.57	47	84.63	39.69	56.5	135.56	324	1.23	0.88	1.28	1	0.36	268.4	4	14.84	6.9	3	57.55	1	5.08458	1.53002	3.35665	1.02664	129.768	4.69749	0	1	0	0	0	0	0	135	4.3	210	0	0
2	44	124	75	120	75	122	75	164	61	88	22.68	63	186.93	68	79.23	40.59	12.9	73.65	214	1.13	0.83	0.96	1	0.49	3.9	1	15.55	6.8	3	45.84	0	4.83523	0.831264	3.40429	1.04992	131.61	4.39776	1	0	0	1	0	0	0	152	7.59	289	0	0
2	46	189	98	194	96	191.5	97	165	50	70	18.37	66	152.07	59	81.83	59.93	25.7	43.45	221	1.33	0.61	5.43	3	0.49	7.4	1	16.81	6.1	3	21.47	0	3.93352	0.490406	2.15856	1.55018	83.45	4.54207	0	0	0	1	0	0	0	99	4.85	252	0	0
2	50	130	78	143	77	136.5	77.5	161	57.7	87	22.26	71	221.87	71	98.05	56.34	75.4	47.15	266	1.44	0.92	4.33	2	0.29	197.4	4	15.41	7.5	4	44.87	0	5.73901	0.532167	4.03777	1.45732	156.1	5.44238	0	0	0	0	0	0	0	161	4.38	196	0	0
1	54	92	51	91	53	91.5	52	150	55	77	24.44	60	162.75	85	80.41	46.93	713.8	91.52	300	1.27	0.72	0.09	1	0.36	176.2	2	19.47	5.7	3	34.14	0	4.20978	1.03296	2.5224	1.21392	97.516	4.46325	0	0	0	0	0	0	0	169	8.2	139	0	0
2	41	139	74	128	68	133.5	71	161	51	66	19.68	72	163.17	62	74.6	67.63	46.9	46.93	244	1.44	0.59	0.17	1	0.26	65.6	3	15.91	5.5	3	19.85	0	4.22064	0.529684	2.2285	1.74935	86.154	4.14076	0	0	0	0	0	0	0	151	10.71	237	0	0
2	56	163	83	154	85	158.5	84	162	61	82	23.24	92	188.47	50	77.1	54.85	0	80.2	171	1.27	0.85	2.51	1	0.72	12.3	2	10.43	10.2	4	45.82	0	4.87506	0.905192	3.04139	1.41878	117.58	4.27953	0	0	0	1	0	0	0	90	8.02	304	0	0
2	70	170	110	160	100	165	105	148	53	95	24.2	71	205.78	62	103.47	72.36	185.3	72.36	291	0.11	0.79	0.55	1	0.4	90.8	3	23.14	7.9	4	28.51	0	5.32281	0.816704	3.07677	1.8717	118.948	5.74323	0	0	0	1	0	0	0	171	6.68	229	0	0
2	60	180	120	170	110	175	115	156	71	92	29.17	72	171.95	62	110.52	41.41	57.8	115.53	312	1.15	0.8	2.93	2	0.31	227.8	4	25.7	6.2	3	28.92	0	4.44775	1.30395	2.77894	1.07113	107.434	6.13455	1	0	0	1	0	0	0	180	8.21	291	0	0
2	42	160	100	150	90	155	95	164	101	128	37.55	76	138.82	61	97.29	45.36	164	146.57	406	1.29	0.57	1.28	1	0.31	151.2	4	12.52	8.6	4	26.59	0	3.59079	1.65429	1.65923	1.17331	64.146	5.4002	0	0	0	1	0	0	0	171	8.38	215	0	0
1	50	140	80	130	70	135	75	160	57	81	22.27	58	195.59	59	86.04	54.55	54.9	185.1	451	1.59	0.82	3.74	2	0.36	462	4	22.02	4.6	1	45.66	0	5.05923	2.08916	2.69064	1.41102	104.02	4.77575	0	0	0	0	0	1	1	138	7.03	259	0	0
2	40	130	80	120	70	125	75	158	77	102	30.84	58	202.18	51	98.44	33.38	58.1	183.72	341	1.04	0.95	1.34	1	0.51	6.4	1	12.4	7.8	4	69.6	1	5.22969	2.07359	3.41583	0.863425	132.056	5.46403	0	1	0	0	0	0	0	128	9.33	285	0	0
2	73	140	100	130	90	135	95	149	57	100	25.67	59	210.22	56	91.6	58.08	606.4	70.15	318	1.53	0.87	1.96	1	0.51	118.5	4	18.03	6.7	3	37.47	0	5.43766	0.791761	3.57243	1.50233	138.11	5.08437	1	0	0	1	0	0	0	178	4.5	162	0	0
2	56	140	90	130	80	135	85	155	60	84	24.97	61	155.46	70	97.12	33.58	122.7	66.07	244	1.03	0.72	3.35	2	0.36	53.7	3	15.69	5	2	30	0	4.02121	0.745711	2.81081	0.868598	108.666	5.39076	0	1	0	0	0	0	0	143	5.74	236	0	0
2	42	130	90	120	80	125	85	153	46	71	19.65	58	210.98	61	91.6	61.28	809.1	74.32	303	1.66	0.82	3.53	2	0.16	97.9	3	14.8	7	3	40.98	0	5.45732	0.838826	3.48774	1.5851	134.836	5.08437	0	0	0	0	0	0	0	174	6.18	235	0	0
2	53	120	90	110	70	115	80	163	63	85	23.71	64	185.75	66	97.95	38.7	57.1	133.14	294	1.09	0.78	1.77	1	0.31	150.7	4	13.17	6.1	3	39.64	0	4.80471	1.50271	3.1149	1.00103	120.422	5.43683	0	1	0	0	0	0	0	150	7.1	186	0	0
1	74	130	90	120	70	125	80	170	65	106	22.49	58	165.3	79	83.65	51.24	86.6	78.02	377	1.15	0.68	2.2	1	0.28	302.9	3	23.34	5.6	3	21.54	0	4.27574	0.880587	2.54671	1.3254	98.456	4.6431	1	0	0	1	0	1	0	171	5.07	153	0	0
2	52	110	80	100	70	105	75	151	43	72	18.86	71	187.69	52	88.02	45.55	23.8	166.03	277	1.36	0.78	4.26	2	0.32	127.4	4	13.53	4.9	2	45.48	0	4.85489	1.87393	2.81774	1.17822	108.934	4.88566	0	0	0	0	0	0	0	168	7.21	178	0	0
2	60	140	100	130	95	135	97.5	156	56	88	23.01	54	257.77	92	116.84	71.13	263.8	118.23	497	2.06	1.06	9.53	4	0.38	120.6	4	23.6	7.8	4	56.05	1	6.66762	1.33442	4.21609	1.83989	162.994	6.48535	0	1	0	1	0	0	0	160	6.89	233	1	1
2	49	120	80	120	70	120	75	165	52	80	19.1	80	240.99	66	91.84	67.94	250.2	60.89	304	1.73	1.01	1.81	1	0.56	74.7	3	20.72	5.8	3	53.6	0	6.23357	0.687246	4.1612	1.75737	160.872	5.09769	0	1	0	0	0	0	0	155	6.71	209	1	1
2	85	150	100	140	90	145	95	145	49	94	23.31	58	182.91	67	90.49	49.22	481.7	82.19	234	1.19	0.74	0.25	1	0.98	125.3	4	20.15	6.3	3	33.19	0	4.73125	0.927652	3.0329	1.27315	117.252	5.02276	0	0	0	1	0	0	0	138	6.21	264	0	0
2	57	160	120	150	110	155	115	155	44	78	18.31	58	202.53	62	91.22	55.09	106.1	76.64	336	1.38	0.88	0.24	1	0.59	171.8	4	16.81	4.7	1	46.06	0	5.23875	0.865011	3.41728	1.42499	132.112	5.06328	1	0	0	1	0	0	0	157	7.57	366	0	0
1	64	120	80	110	70	115	75	149	53	79	23.87	58	170.84	63	78.44	75.15	281.8	41.99	319	1.7	0.69	3.33	2	0.49	180.1	2	16.34	4.8	2	17.85	0	4.41904	0.473928	2.25794	1.94387	87.292	4.35391	0	0	0	0	0	1	1	159	6.37	205	0	0
2	70	170	120	160	110	165	115	159	49	97	19.38	58	150.19	55	80.35	40.31	35	93.96	334	1.07	0.69	2.39	1	0.4	185.1	4	19.78	5.1	2	32.61	0	3.88489	1.0605	2.35613	1.04268	91.088	4.45992	0	0	0	1	0	0	0	156	7.89	200	0	0
1	66	150	100	140	95	145	97.5	168	53	78	18.78	58	172.44	70	91.7	71.95	97.8	83.31	293	1.58	0.66	2.42	1	0.34	94.9	1	17.82	5.7	3	24.25	0	4.46042	0.940293	2.16834	1.8611	83.828	5.08992	1	0	0	1	0	0	0	171	4.67	229	0	0
2	58	120	80	110	70	115	75	155	45	70	18.73	62	222.77	67	73.96	58.53	76.7	71.66	271	1.39	0.92	5.31	3	0.07	42.8	3	13.27	4.6	1	40.97	0	5.76229	0.808804	3.8776	1.51397	149.908	4.10524	0	0	0	0	0	0	0	161	5.82	285	0	0
2	47	150	100	140	90	145	95	148	47	76	21.46	65	215.91	58	87.92	75.14	638.8	80.74	182	1.88	0.79	4.58	3	0.61	13.7	2	13.04	5.9	3	35.63	0	5.58484	0.911287	3.22354	1.94361	124.622	4.88011	0	0	0	1	0	0	0	132	4.98	255	0	0
2	61	140	100	130	90	135	95	146	43	82	20.17	60	170.92	66	91.84	61.57	39.2	65.73	244	1.42	0.66	4.25	2	0.33	53.2	3	21.29	4.7	1	0.03	0	4.42111	0.741874	2.48846	1.5926	96.204	5.09769	1	0	0	1	0	0	0	155	6.58	248	0	0
2	61	130	90	120	80	125	85	148	61	90	27.85	61	154.01	64	100.21	40.38	159	170.04	409	1.22	0.65	6.73	4	0.58	225.4	4	16.7	6.8	3	32.32	0	3.9837	1.91919	2.05954	1.04449	79.622	5.56228	1	0	0	1	0	0	0	155	7.27	219	0	0
2	39	130	90	120	80	125	85	165	82	103	30.12	63	207.04	64	95.18	54.48	78.6	118.44	330	1.41	0.85	2.71	1	0.22	84.7	3	17.64	7.7	4	40.51	0	5.35541	1.33679	3.33347	1.40921	128.872	5.28308	0	0	0	0	0	0	0	156	6.26	222	0	0
1	42	140	95	130	85	135	90	166	54	76	19.6	50	120.05	73	86.36	38.49	556.4	102.41	290	0.97	0.5	5	3	0.31	83.2	1	16.63	4.5	1	19.61	0	3.10528	1.15587	1.57988	0.995603	61.078	4.79352	0	1	0	1	0	1	0	175	6.73	235	0	0
1	82	140	92	130	81	135	86.5	164	51	78	18.96	41	197.54	69	112.57	38.27	73.5	117.24	336	1.06	0.96	3.81	2	0.6	573	4	27.82	4.9	2	59.9	1	5.10967	1.32325	3.51324	0.989912	135.822	6.24833	0	1	0	0	0	0	0	157	7.5	204	0	0
2	44	120	80	110	70	115	75	150	45	73	20	84	211.82	71	109.59	63.22	67.7	81.39	270	1.42	0.85	5.83	4	0.21	63.6	3	17.57	4.9	2	36.92	0	5.47905	0.918623	3.42271	1.63528	132.322	6.08293	0	0	0	0	0	0	0	153	6.71	295	0	0
2	55	140	90	130	80	135	85	158	72	95	28.84	58	243.57	54	102.5	50.8	134.7	324.46	197	1.4	0.91	5.48	4	0.49	9.8	1	17.17	11.4	4	71.44	1	6.30031	3.66208	3.30776	1.31402	127.878	5.68939	0	1	0	0	0	0	0	149	8.78	317	1	0
1	40	118	78	108	63	113	70.5	175	56	73	18.29	53	142.29	78	78.44	45.69	462.4	94.63	364	1.11	0.67	2.69	2	0.38	153.4	2	16.85	5.1	2	24.74	0	3.68055	1.06806	2.00916	1.18184	77.674	4.35391	1	0	0	1	0	1	0	178	7.43	312	0	0
2	37	115	81	105	75	110	78	151	43	67	18.86	54	176.33	66	88.92	70.63	35.4	79.35	284	1.62	0.64	5.24	3	0.33	63.2	3	12.81	4.7	1	21.28	0	4.56105	0.895598	2.32359	1.82695	89.83	4.93561	0	0	0	0	0	0	0	146	7.26	362	0	0
2	46	113	78	104	69	108.5	73.5	161	56	81	21.6	55	132.24	64	91.32	59.2	140.4	55.36	289	1.24	0.52	5.41	3	0.18	5.9	1	12.12	6.5	3	13.09	0	3.42059	0.624831	1.6029	1.5313	61.968	5.06883	0	0	0	0	0	0	0	118	4.6	195	0	0
1	74	135	86	115	76	125	81	170	50	82	17.3	69	122.26	70	88.99	47.4	6.8	61.19	379	1.14	0.51	0.74	1	0.38	128.4	1	17.46	5.5	3	15.07	0	3.16244	0.690632	1.61981	1.22607	62.622	4.9395	0	0	0	0	0	1	0	158	5.29	351	0	0
1	79	165	105	156	96	160.5	100.5	156	67	92	27.53	111	158.72	94	90.35	39.99	374.6	87.04	406	1	0.72	6.46	4	1.03	29	1	20.45	6.8	4	28.69	0	4.10554	0.982393	2.62085	1.0344	101.322	5.01499	1	1	0	1	0	0	0	179	9.2	229	0	0
2	43	105	76	100	68	102.5	72	140	45	82	22.96	73	181.87	55	67.47	59.04	343.3	47.11	209	1.33	0.76	5.71	4	0.45	6.9	1	11.42	5.8	3	28.9	0	4.70435	0.531716	2.93347	1.52716	113.408	3.745	0	0	0	0	0	0	0	142	5.5	244	0	0
2	37	125	85	115	73	120	79	153	48	71	20.5	69	156.57	70	84.72	60.47	168.6	69.53	250	1.32	0.6	5.55	4	0.38	35.9	2	12.12	5.6	3	18.52	0	4.04992	0.784763	2.12607	1.56415	82.194	4.70249	0	0	0	0	0	0	0	156	8.05	310	0	0
2	59	175	115	165	105	170	110	152	56	90	24.24	70	195.18	59	133.02	34.97	76	246.55	293	1.15	0.86	3.58	2	0.49	129	4	14.14	5.2	2	58.79	1	5.04863	2.78273	2.8686	0.904553	110.9	7.38344	1	1	0	1	1	0	0	177	8.54	226	0	0
2	32	105	75	100	68	102.5	71.5	152	47.5	68	20.56	57	137.79	60	74.69	49.95	67.4	76.76	330	1.24	0.58	3.23	2	0.32	177.3	4	10.45	4.9	2	19.78	0	3.56415	0.866366	1.87501	1.29203	72.488	4.14576	0	0	0	0	0	0	0	146	4.91	300	0	0
2	77	180	115	165	105	172.5	110	152	42	68	18.18	67	175.84	56	122.33	49.6	179.5	91.95	322	1.19	0.76	5.29	3	2.23	74.7	3	19.67	4.6	1	30.81	0	4.54837	1.03781	2.78971	1.28298	107.85	6.79008	1	0	0	1	0	0	0	159	4.93	286	0	0
2	62	172	100	170	100	171	100	155	48	75	19.98	88	162.28	67	88.82	48.1	113.8	63.08	325	1.28	0.7	2.23	1	0.4	402.3	4	19.88	5.5	3	23.35	0	4.19762	0.711964	2.62711	1.24418	101.564	4.93006	1	0	0	1	0	0	0	176	6.83	185	0	0
1	53	170	70	168	71	169	70.5	165	64	87	23.51	79	179.13	63	87.75	49	90.5	105.78	442	1.25	0.78	2.03	1	0.26	468.3	4	15.16	5.5	3	32.07	0	4.63347	1.19391	2.81878	1.26746	108.974	4.87067	1	0	0	1	0	1	1	160	7.06	156	0	0
2	49	134	67	130	65	132	66	164	68	78	25.28	78	214.89	64	86.39	46.54	127.8	139.31	318	1.33	0.93	2.69	1	0.84	136.9	4	16.05	6.8	3	52.42	0	5.55846	1.57235	3.63394	1.20383	140.488	4.79518	0	0	0	0	0	0	0	146	5.58	268	0	0
2	49	138	73	135	70	136.5	71.5	157	48	75	19.47	88	206.3	73	92.64	65.77	30.2	71.6	230	1.6	0.84	3.85	2	0.51	79.2	3	16.67	8.2	4	32.29	0	5.33626	0.808126	3.26461	1.70124	126.21	5.1421	0	0	0	0	0	0	0	148	9.33	335	0	0
2	48	126	76	125	75	125.5	75.5	158	52	82	20.83	63	178.3	80	86.39	57.49	63.2	59.75	345	1.29	0.75	2.98	2	0.42	79.7	3	18.84	6.9	3	25.63	0	4.612	0.674379	2.81583	1.48707	108.86	4.79518	0	0	0	0	0	0	0	146	9.18	341	0	0
2	76	160	110	150	100	155	105	154	50	83	21.08	74	147.9	44	94.17	43.63	625.3	118.82	235	1.19	0.62	5.42	3	0.73	197.9	4	18.14	5.8	3	23.87	0	3.82566	1.34108	2.08241	1.12856	80.506	5.22702	0	0	0	1	0	0	0	128	5.71	299	0	0
2	45	122	80	120	79	121	79.5	162	50	84	19.05	87	196.35	44	104.45	35.52	17.7	220.34	300	1.14	0.84	6.65	4	0.4	123.7	4	12.3	8.1	4	55.48	1	5.07889	2.48691	3.02023	0.918779	116.762	5.79762	0	1	0	0	0	0	0	177	7.26	237	0	0
2	40	117	80	120	82	118.5	81	165	50	86	18.37	68	184.57	61	99.17	55.56	59.7	69.54	212	1.36	0.79	5.78	4	0.66	1.5	1	11.57	4.6	1	31.1	0	4.77419	0.784876	2.97729	1.43714	115.102	5.50455	0	0	0	0	0	0	0	135	7.77	246	0	0
2	42	120	80	110	70	115	75	150	49	78	21.78	89	213.68	44	89.9	51.97	186.8	119.37	174	1.45	1	3.62	2	3.28	1.5	1	9.81	8.3	4	51.87	0	5.52716	1.34729	3.56534	1.34428	137.836	4.99001	0	0	0	0	0	0	0	111	7.18	347	0	0
2	47	130	90	120	80	125	85	166	56	78	20.32	64	228.66	58	88.93	74.5	109.3	77.04	256	1.75	0.89	3.89	2	0.22	181.7	4	18.67	7.6	4	36.54	0	5.91464	0.869526	3.58903	1.92706	138.752	4.93617	0	0	0	0	0	0	0	147	6.12	243	0	0
2	64	140	90	130	80	135	85	160	58	75	22.66	60	198.99	53	89.52	50.18	58.7	91.4	287	1.27	0.87	2.55	1	0.51	75.2	3	14.45	4.9	2	40.91	0	5.14718	1.0316	3.37636	1.29798	130.53	4.96892	0	0	0	0	0	0	0	167	6.19	214	0	0
2	81	170	110	150	100	160	105	147	66	94	30.54	60	168.22	64	85.39	57.13	173.6	65.19	290	1.31	0.7	5.54	4	1.32	326.3	4	23.44	6.2	3	24.5	0	4.35127	0.735779	2.53626	1.47775	98.052	4.73968	1	0	0	1	0	0	0	176	6.85	305	0	0
2	61	145	95	135	80	140	87.5	159	63	90	24.92	69	328.12	58	90.22	51.34	198.1	280.18	288	1.47	1.43	8.14	4	0.89	353.1	4	15.95	8.3	4	103.86	1	8.48733	3.1623	5.70988	1.32799	220.744	5.00777	0	1	0	1	0	0	0	166	6.61	381	1	1
2	51	130	90	120	80	125	85	157	43	66	17.44	74	149.22	46	83.55	37.64	44.6	163.1	204	1.2	0.67	34.26	4	2.34	6.4	1	11.45	10.8	4	29.7	0	3.8598	1.84086	2.04242	0.973616	78.96	4.63754	0	1	0	0	0	0	0	183	8.48	223	0	0
2	77	160	100	150	95	155	97.5	152	37	70	16.01	76	183.12	55	80.46	45.86	76	85.28	209	1.16	0.84	12.79	4	0.61	111.8	3	17.82	10.7	4	38.53	0	4.73668	0.962528	3.10926	1.18624	120.204	4.46603	0	0	0	1	0	0	0	178	7.77	299	0	0
2	41	130	80	120	70	125	75	159	47	70	18.59	60	153.59	56	77.51	41.74	34.7	55.92	182	1.03	0.64	5.13	3	0.62	8.3	1	12.24	5.9	3	23.37	0	3.97284	0.631151	2.60388	1.07967	100.666	4.30229	0	0	0	0	0	0	0	164	9	212	0	0
2	74	140	90	130	80	135	85	158	62	76	24.84	60	237.67	95	83.31	36.67	24.5	225.62	443	1.13	1.1	3.61	2	2.11	211.6	4	24.29	6.7	3	69.48	1	6.1477	2.5465	4.03197	0.948526	155.876	4.62422	1	1	0	1	0	0	0	100	5.48	393	0	0
2	50	120	30	110	80	115	55	154	50	83	21.08	58	156.64	52	93.79	41.69	18.7	100.94	237	1.2	0.69	4.85	3	0.3	2	1	17.68	6.1	3	32.72	0	4.05173	1.13928	2.45116	1.07838	94.762	5.20593	0	0	0	0	0	0	0	87	10.04	527	0	0
1	41	120	85	110	74	115	79.5	160	44	60	17.19	58	100.36	70	102.06	33.51	16.1	54.16	379	0.84	0.48	4.4	3	0.17	161.5	2	18.74	4.5	1	12.7	0	2.59596	0.611287	1.44899	0.866787	56.018	5.66496	0	1	0	0	0	0	0	149	5.73	234	0	0
1	49	150	100	140	100	145	100	171	86	100	29.41	60	237.81	79	99.38	58.97	109.3	205.43	522	1.5	0.97	3.74	2	0.62	1056.5	4	37.61	7.2	4	64.69	1	6.15132	2.31862	3.56322	1.52535	137.754	5.51621	0	1	0	1	0	1	1	197	8.51	198	0	0
2	61	120	70	110	65	115	67.5	142	43	65	21.33	41	186.03	50	92.27	52.28	154.3	43.51	279	1.37	0.85	4.71	3	0.32	309.3	4	11.72	6.3	3	34.51	0	4.81195	0.491084	3.23456	1.3523	125.048	5.12156	0	0	0	0	0	0	0	159	5.66	274	0	0
2	45	130	80	120	70	125	75	157	52	90	21.1	75	157.75	57	95.36	57.1	147.7	60.93	262	1.28	0.63	3.71	2	0.31	89.8	3	12.36	4.7	1	20.86	0	4.08044	0.687698	2.28826	1.47698	88.464	5.29307	0	0	0	0	0	0	0	137	6.58	204	0	0
1	43	120	90	110	80	115	85	167	58	71	20.8	60	133.22	71	78.13	38.93	81.8	126.88	215	1.08	0.57	5.51	4	0.38	285.8	3	14.49	4.6	1	20.1	0	3.44594	1.43205	1.78257	1.00698	68.914	4.3367	0	1	0	0	0	1	0	179	7.7	220	0	0
2	43	130	90	120	80	125	85	152	48	77	20.78	58	193.24	59	104.77	72.46	707.6	65.19	271	1.74	0.76	0.43	1	0.57	59.2	3	14.28	5.5	3	31.54	0	4.99845	0.735779	2.78691	1.87429	107.742	5.81539	0	0	0	0	0	0	0	155	7.35	233	0	0
2	40	120	80	110	70	115	75	153	54	80	23.07	60	182.22	75	90.74	41.93	82.8	187.37	322	1.2	0.74	0.41	1	0.54	43.8	3	18.35	10.7	4	43.44	0	4.7134	2.11479	2.65949	1.08458	102.816	5.03663	0	0	0	0	0	0	0	145	6.89	238	0	0
2	71	160	100	150	90	155	95	148	40	67	18.26	60	167.8	59	102.34	54.05	117.3	51.85	252	1.29	0.7	4.6	3	0.64	203.6	4	18.18	6.3	3	23.46	0	4.3404	0.585214	2.67408	1.39809	103.38	5.68051	1	0	0	1	0	0	0	150	7.21	255	0	0
2	62	130	90	120	80	125	85	157	53	81	21.5	60	214.31	60	113.48	42.89	143.6	129.94	305	1.19	1.07	4.76	3	0.35	274.6	4	17.32	4.7	1	68.56	1	5.54346	1.46659	3.76182	1.10942	145.432	6.29885	0	0	0	0	0	0	0	188	7.73	186	0	0
2	57	130	90	120	80	125	85	159	44	72	17.4	72	145.69	63	82.02	69.79	81.5	54.91	273	1.52	0.51	3.15	2	0.38	120.1	4	17.1	5.9	3	13.9	0	3.76849	0.619752	1.6792	1.80523	64.918	4.55262	0	0	0	0	0	0	0	165	6.76	282	0	0
2	61	145	81	145	80	145	80.5	157	74	100	30.02	72	211.89	51	96.24	36.22	19	173.51	329	1.12	0.97	2.72	1	0.44	258.7	4	16.49	4.6	1	60.12	1	5.48086	1.95835	3.64635	0.936886	140.968	5.34192	0	1	0	1	0	0	0	120	6.9	276	0	0
2	61	160	110	170	100	165	105	154	85	112	35.84	78	279.47	60	103.81	59.83	23.5	201.66	406	1.72	1.13	7.74	4	0.69	142.2	4	21.23	10.7	4	70.24	1	7.22892	2.27607	4.63808	1.54759	179.308	5.7621	1	1	0	1	0	0	0	159	6.59	123	1	1
2	42	128	72	113	71	120.5	71.5	153	53	78	22.64	60	193.24	48	87.52	39.36	108.4	141.64	251	1.23	0.86	3.3	2	0.69	80.2	3	13.9	5.2	2	46.67	0	4.99845	1.59865	3.24759	1.01811	125.552	4.8579	0	1	0	0	0	0	0	156	5.95	242	0	0
1	44	124	67	127	64	125.5	65.5	172	69	83	23.32	60	152.21	67	77.66	48.8	76.4	52.8	297	1.19	0.66	4.99	3	0.29	132.1	1	21.06	4.5	1	21.57	0	3.93714	0.595937	2.40171	1.26229	92.85	4.31061	0	0	0	0	0	1	0	120	7.14	212	0	0
2	51	140	90	150	90	145	90	171	58	76	19.84	78	213.34	65	82.66	39.09	37.3	219.45	350	1.21	0.99	1.93	1	0.46	49.2	3	24.16	6.6	3	61.27	1	5.51837	2.47686	3.37196	1.01112	130.36	4.58814	0	1	0	1	0	0	0	155	5.71	236	0	0
1	63	125	76	123	75	124	75.5	169	54	74	18.91	58	142.58	51	80.3	55.45	123	54.01	290	1.18	0.61	19.77	4	0.84	209.3	3	18.46	299.2	4	16.23	0	3.68805	0.609594	1.97434	1.4343	76.328	4.45715	0	0	0	0	0	1	0	157	6	146	0	0
2	56	126	83	125	80	125.5	81.5	160	53.5	88	95	66	181.53	51	70.82	50.55	183.2	61.24	328	1.18	0.8	3.61	2	0.95	113.9	3	12.65	5	2	30.48	0	4.69555	0.691196	3.07118	1.30755	118.732	3.93095	0	0	0	0	0	0	0	150	6.18	222	0	0
2	53	160	96	174	98	167	97	162	79	99	30.1	59	192.14	55	79.96	58.08	595.8	99.77	300	1.5	0.79	3.5	2	0.73	48.7	3	21.63	8.4	4	36.01	0	4.96999	1.12607	2.95153	1.50233	114.106	4.43828	0	0	0	1	0	0	0	150	5.41	181	0	0
2	47	112	65	114	70	113	67.5	163	51	74	19.2	82	196.78	67	95.72	52.13	381.3	80.78	250	1.26	0.86	5.59	4	0.49	24.6	2	12.94	10.4	4	33.85	0	5.09002	0.911738	3.32369	1.34842	128.494	5.31306	0	0	0	0	0	0	0	152	4.85	200	0	0
1	34	130	50	118	55	124	52.5	163	59	78	22.21	59	125.87	83	83.15	48	186.5	43.82	372	0.97	0.59	9.24	4	0.38	344.9	4	20.18	24.9	4	14.86	0	3.25582	0.494582	1.78753	1.24159	69.106	4.61534	0	0	0	0	0	0	0	120	6.33	201	0	0
1	33	135	65	130	67	132.5	66	168	61	82	21.61	64	130.24	76	110.2	48.24	148	37.24	292	1.09	0.58	5.55	4	0.2	211	3	12.21	5.9	3	16.14	0	3.36886	0.420316	1.9284	1.2478	74.552	6.11679	0	0	0	0	0	0	0	120	6.29	245	0	0
2	58	126	76	119	85	122.5	80.5	164	57	72	21.19	63	194.56	52	83.32	55.02	68.7	115.15	227	1.47	0.83	4.17	2	0.47	295.9	4	16.23	5	2	33.67	0	5.03259	1.29966	3.01371	1.42318	116.51	4.62478	0	0	0	0	0	0	0	120	6.55	201	0	0
1	52	119	69	112	77	115.5	73	167	82.5	107	29.58	72	226.73	114	83.95	36.18	602.5	168.96	297	1.06	1.15	1.36	1	0.55	524.4	4	24.68	7.1	4	73.91	1	5.86472	1.907	4.05479	0.935851	156.758	4.65975	0	1	0	0	0	0	0	140	7.82	165	0	0
1	47	154	81	149	81	151.5	81	176	73.5	75	23.73	65	203.56	67	77.01	36.89	29.6	104.81	342	1.09	0.94	4.21	2	0.29	192.9	2	21.83	5.9	3	59.78	1	5.26539	1.18296	3.76896	0.954216	145.708	4.27453	0	1	0	1	0	0	0	177	8.41	252	0	0
1	46	118	63	117	68	117.5	65.5	171	60	75	20.52	68	176.25	85	77.6	35.05	20.3	134.92	363	1.36	0.69	3.18	2	0.29	191.7	2	19.26	4.7	1	41.34	0	4.55898	1.5228	2.95437	0.906622	114.216	4.30728	0	1	0	0	0	0	0	173	8.36	190	0	0
1	40	108	82	114	74	111	78	178	57.4	80	18.12	65	166.82	62	61.7	58.46	452.1	64.98	381	1.39	0.71	0.74	1	0.42	182.8	2	18.91	4.8	2	31.76	0	4.31505	0.733409	2.46674	1.51216	95.364	3.42473	0	0	0	0	0	0	0	166	7.64	238	0	0
1	56	127	89	131	83	129	86	165	80	90	29.38	72	131.89	84	89.3	36.35	124.3	103.79	427	1	0.61	0.07	1	0.37	438	4	22.06	6.5	4	33.64	0	3.41154	1.17144	1.93435	0.940248	74.782	4.95671	1	1	0	1	0	0	0	187	7.25	240	0	0
1	61	131	74	128	61	129.5	67.5	172	67.6	75	22.85	78	229.21	84	74.82	50.49	291.6	74.24	368	1.25	1.01	2.83	2	0.3	218.5	3	18.03	5.3	3	53.69	0	5.92887	0.837923	4.2388	1.306	163.872	4.15298	0	1	0	0	0	0	0	169	8.66	205	0	1
2	39	127	69	131	68	129	68.5	161	64	70	24.69	79	195.45	70	94.68	55.61	358.5	111.48	341	1.43	0.88	0.44	1	0.36	27.5	2	13.5	8.6	4	49.24	0	5.05561	1.25824	3.04046	1.43844	117.544	5.25533	0	0	0	0	0	0	0	154	8.97	224	0	0
1	62	150	76	149	72	149.5	74	170	68	85	23.53	73	171.74	68	89.99	40.23	197.2	78.32	314	1.05	0.81	1.89	1	0.51	653.7	4	17.17	4.6	1	36.96	0	4.44232	0.883973	2.99653	1.04061	115.846	4.995	0	0	0	1	0	0	0	169	6.35	175	0	0
1	45	101	75	102	60	101.5	67.5	183	65	170	19.41	79	209.45	78	87.49	71.39	55.2	69.06	293	1.58	0.84	5.16	3	0.33	338.9	4	21.66	4.8	2	36.7	0	5.41774	0.779458	3.21386	1.84661	124.248	4.85624	0	0	0	0	0	0	0	178	5.39	235	0	0
1	42	120	81	124	73	122	77	177	67	78	21.39	68	126.34	63	73.95	59.54	52	52.29	294	1.39	0.48	5.01	3	0.29	292.7	3	26.86	5.9	3	15.57	0	3.26798	0.590181	1.45737	1.54009	56.342	4.10468	0	0	0	0	0	0	0	176	6.78	259	0	0
1	41	114	75	140	67	127	71	161	63	178	24.3	54	203.07	84	88.43	40.91	32.2	118.06	277	1.12	0.93	5	3	0.2	370.3	4	11.9	5.3	3	62.35	1	5.25272	1.33251	3.58376	1.0582	138.548	4.90841	0	0	0	0	0	0	0	168	6.49	180	0	0
2	41	133	72	122	73	127.5	72.5	163	56	70	21.08	82	140.48	56	100.59	50.66	297.6	37.56	194	1.08	0.6	5.74	4	0.22	15.2	2	14.98	4.9	2	22.16	0	3.63373	0.423928	2.12902	1.3104	82.308	5.58337	0	0	0	0	0	0	0	138	6.48	182	0	0
2	38	124	68	125	65	124.5	66.5	162	43	66	16.38	57	162.87	63	76.52	64.83	36.3	48.12	270	1.42	0.63	5.47	4	0.26	8.3	1	19.91	4.4	1	26.4	0	4.21288	0.543115	2.28702	1.67693	88.416	4.24734	0	0	0	0	0	0	0	122	8.41	305	0	0
2	30	124	72	118	68	121	70	154	41	64	17.29	73	180.48	57	86.87	60.55	109	77.4	236	1.5	0.77	5.43	3	0.25	3.9	1	14.63	5	2	36.87	0	4.66839	0.873589	2.70176	1.56622	104.45	4.82183	0	0	0	0	0	0	0	144	14.12	273	0	0
2	79	187	76	172	74	179.5	75	150	64	90	28.44	68	171.43	63	84.38	50.78	7.2	80.02	335	1.24	0.71	4.76	3	0.88	191.2	4	21.26	6	3	30.06	0	4.4343	0.90316	2.70683	1.3135	104.646	4.68361	1	0	0	1	0	0	0	158	7.1	255	0	0
2	46	85	58	86	60	85.5	59	163	43	68	16.18	73	156.53	65	79.34	62.53	379.1	61.04	254	1.35	0.62	1.13	1	0.65	134.2	4	21.16	6.1	3	20.31	0	4.04889	0.688939	2.11568	1.61743	81.792	4.40386	0	0	0	0	0	0	0	143	7.33	227	0	0
2	28	126	72	120	77	123	74.5	162	52	75	19.81	80	188.69	67	81.15	56.64	396.1	85.77	291	1.29	0.73	4.04	2	0.23	32.4	2	17.07	5.1	2	31.15	0	4.88076	0.968059	2.97196	1.46508	114.896	4.50433	0	0	0	0	0	0	0	162	7.56	235	0	0
2	63	134	82	122	79	128	80.5	158	48	86	19.23	65	174.97	62	86.6	45.66	10	130.23	267	1.28	0.74	4.93	3	0.34	258.7	4	17.32	4.7	1	37.89	0	4.52587	1.46986	2.67108	1.18107	103.264	4.80684	0	0	0	0	0	0	0	184	6.51	184	0	0
2	55	177	84	162	90	169.5	87	151	56	75	24.56	66	194.03	61	82.26	46.17	252.9	130.6	251	1.22	0.84	3.64	2	0.36	146.4	4	14.8	6.5	3	44.25	0	5.01888	1.47404	3.14899	1.19426	121.74	4.56594	0	0	0	1	0	0	0	163	8.43	207	0	0
1	50	110	69	122	65	116	67	172	71	85	24	74	216.14	63	102.75	48.97	176.7	73.63	259	1.21	1.04	4.91	3	0.16	490.9	4	17.07	6.4	4	72.15	1	5.59079	0.831038	3.9432	1.26668	152.444	5.70326	1	0	0	1	0	0	0	185	7.52	171	0	0
2	36	112	80	109	59	110.5	69.5	167	56	70	20.08	60	158.89	60	77.78	55.21	40.5	85.77	298	1.25	0.6	5.09	3	0.21	26	2	17.5	6.7	3	23.59	0	4.10993	0.968059	2.23813	1.42809	86.526	4.31727	0	0	0	0	0	0	0	151	5.14	255	0	0
2	33	112	69	107	77	109.5	73	169	48	68	16.81	88	172.13	63	85.14	54.09	12	57.33	242	1.29	0.69	5.43	3	0.16	6.4	1	14.35	4.9	2	28.55	0	4.45241	0.647065	2.7567	1.39912	106.574	4.7258	0	0	0	0	0	0	0	111	7.56	263	0	0
1	46	105	58	100	53	102.5	55.5	155	50	64	20.81	68	211.15	75	96.19	76.63	111.9	50.01	287	1.77	0.84	5.32	4	0.12	386.5	4	11.45	4.8	2	34.88	0	5.46172	0.564447	3.22085	1.98215	124.518	5.33914	0	0	0	0	0	0	0	168	6.43	247	0	0
2	50	128	64	107	62	117.5	63	167	56	81	20.08	65	179.89	74	82.58	46.2	74.4	116.33	287	1.16	0.78	1.33	1	0.56	88.3	3	19.23	10.6	4	39.06	0	4.65313	1.31298	2.85629	1.19503	110.424	4.5837	0	0	0	0	0	0	0	170	6.1	239	0	0
1	55	82	41	90	62	86	51.5	172	59	76	19.94	79	189.66	68	90.63	39.3	68	116.52	358	1.04	0.88	1.79	1	0.31	33.4	1	20.22	5.1	2	51.48	0	4.90585	1.31512	3.2865	1.01655	127.056	5.03053	0	1	0	0	0	0	0	197	14.31	208	0	0
2	37	128	78	118	99	123	88.5	163	46	64	17.31	70	130.05	53	79.28	57.84	51.4	47.32	226	1.21	0.5	5.62	4	0.29	8.3	1	13.6	4.7	1	13.2	0	3.36394	0.534086	1.62302	1.49612	62.746	4.40053	0	0	0	0	0	0	0	156	5.91	144	0	0
1	39	102	46	90	63	96	54.5	171	51	70	17.44	64	122.08	58	90.67	42.48	54.9	38.34	292	0.98	0.55	4.87	3	0.2	142.7	2	21.59	4.5	1	17.82	0	3.15779	0.432731	1.86063	1.09881	71.932	5.03275	0	0	0	0	0	0	0	167	5.71	259	0	0
1	48	97	64	98	62	97.5	63	155	57	83	23.73	82	154.31	63	282.99	51.73	236.6	46.49	292	1.12	0.71	0.97	1	0.44	520.1	4	20.89	6.7	4	31.05	0	3.99146	0.524718	2.41288	1.33808	93.282	15.7077	0	0	0	0	1	0	0	179	8.59	191	0	0
2	30	120	71	111	70	115.5	70.5	155	48	72	19.98	102	148.63	50	83.16	45.22	441.3	47.51	236	1.07	0.66	3.58	2	0.37	0.5	1	12.91	5.3	2	26.39	0	3.84454	0.53623	2.42907	1.16968	93.908	4.6159	0	0	0	0	0	0	0	123	10.64	255	0	0
1	66	166	89	154	79	160	84	168	56	77	19.84	63	186.06	73	95.87	50.88	131.6	98.27	293	1.29	0.81	3.45	2	0.79	61.2	1	47.23	4.6	1	45	0	4.81273	1.10914	2.98826	1.31609	115.526	5.32138	1	0	0	1	0	0	0	182	10.47	241	0	0
1	54	139	93	134	93	136.5	93	171	84	97	28.73	62	161.18	76	95.01	31.79	44.3	157.46	384	0.92	0.77	3.31	2	0.33	274	3	14.84	5.8	3	48.5	0	4.16917	1.7772	2.53228	0.822297	97.898	5.27365	0	1	0	1	0	0	0	182	7.01	192	0	0
2	26	98	61	95	62	96.5	61.5	158	38	66	15.22	84	121.46	59	80.15	52.81	202	42.6	227	1.13	0.53	1.06	1	0.09	6.4	1	11.93	7.6	4	17.11	0	3.14175	0.480813	1.55535	1.36601	60.13	4.44882	0	0	0	0	0	0	0	127	5.53	328	0	0
1	40	115	69	112	66	113.5	67.5	171	59	78	20.18	70	123.26	63	87.19	40.12	128.4	80.3	278	1.02	0.54	3.21	2	0.31	334.9	4	21.03	5.2	2	20.57	0	3.18831	0.906321	1.73513	1.03777	67.08	4.83959	0	0	0	0	0	0	0	187	5.82	201	0	0
2	46	126	70	127	67	126.5	68.5	162	60	83	22.86	74	148.7	47	92.19	52.75	37	208.23	273	1.65	0.58	7.05	4	0.45	87.8	3	9.38	7	3	33.65	0	3.84635	2.35023	1.40466	1.36446	54.304	5.11712	0	1	0	0	0	0	0	126	6.63	235	0	0
1	71	108	72	117	71	112.5	71.5	163	51	70	19.2	82	130.31	66	76.65	38.78	24.5	82.67	288	1.01	0.63	9.89	4	1.01	41.8	1	28.87	7.5	4	23.69	0	3.37067	0.93307	1.93989	1.0031	74.996	4.25455	0	1	0	0	0	0	0	181	6.77	203	0	0
2	32	105	60	106	61	105.5	60.5	154	43	78	20	76	144.11	54	101.75	51.41	63.9	61.55	224	1.18	0.6	4.68	3	0.32	50.7	3	12.84	4.8	1	25.34	0	3.72763	0.694695	2.07941	1.3298	80.39	5.64776	0	0	0	0	0	0	0	157	9.93	242	0	0
2	36	116	78	111	73	113.5	75.5	158	53	71	21.23	76	179.25	64	76.16	57.48	115.4	60.25	185	1.37	0.73	5.13	3	0.67	7.4	1	17.86	5	2	35.72	0	4.63658	0.680023	2.83808	1.48681	109.72	4.22735	0	0	0	0	0	0	0	143	6.67	200	0	0
2	65	120	56	112	54	116	55	155	64.2	89	26.72	81	206.07	56	95.29	46.2	17.7	100.54	293	1.16	0.95	17.83	4	1.28	431.2	4	19.33	9.8	4	53.77	0	5.33032	1.13476	3.61516	1.19503	139.762	5.28919	0	0	0	0	0	0	0	152	7.77	281	0	0
1	44	95	71	110	63	102.5	67	179	61	73	19.04	93	135.3	100	96.41	50.63	70.3	52	336	1.22	0.55	4.97	3	0.16	423.7	4	17.86	6	3	23.36	0	3.49974	0.586907	1.92111	1.30962	74.27	5.35135	0	0	0	0	0	0	0	175	6.46	263	0	0
2	48	176	104	192	100	184	102	157	75	79	30.43	65	237.26	58	87.41	55.61	69	157.7	395	1.43	0.94	6.41	4	0.32	198.5	4	20.05	11	4	57.11	1	6.13709	1.77991	3.88282	1.43844	150.11	4.8518	1	0	0	1	0	0	0	153	6.63	242	0	0
2	47	150	92	173	95	161.5	93.5	168	53	78	20	67	168.02	79	81.61	58.34	17.1	123.79	231	1.45	0.65	5.11	3	0.55	4.9	1	23.08	4.6	1	34.81	0	4.34609	1.39718	2.19664	1.50905	84.922	4.52986	0	0	0	1	0	0	0	74	5.81	416	0	0
1	50	142	69	133	82	137.5	75.5	173	55	76	18.38	62	174.81	86	87.59	53.86	96.2	99.71	380	1.3	0.74	5.76	4	0.48	242.5	3	21.86	5.4	3	39.85	0	4.52173	1.1254	2.61273	1.39317	101.008	4.86179	0	0	0	0	0	0	0	175	6.13	188	0	0
2	68	121	62	145	63	133	62.5	150	51	80	22.67	75	206.56	68	83.04	61.79	140.1	63.59	286	1.31	0.86	1.33	1	0.76	249	4	21.53	6.3	3	41.47	0	5.34299	0.71772	3.41573	1.59829	132.052	4.60924	0	0	0	0	0	0	0	144	4.11	183	0	0
1	37	129	75	106	88	117.5	81.5	168	62	76	21.97	73	148.41	84	85.19	48.45	20	77.11	417	1.17	0.64	4.87	3	0.12	307.4	4	15.59	5.6	3	29.05	0	3.83885	0.870316	2.1867	1.25323	84.538	4.72857	0	0	0	0	0	0	0	185	7.05	163	0	0
2	42	130	68	124	73	127	70.5	163	54	65	20.32	61	172.8	54	84.01	72.53	15.2	59.05	227	1.6	0.64	5.72	4	0.17	11.3	1	13.97	6.1	3	27.3	0	4.46974	0.666479	2.28815	1.8761	88.46	4.66308	0	0	0	0	0	0	0	121	8.52	254	0	0
2	59	111	69	115	63	113	66	157	57	86	23.12	101	151.73	50	106.82	46.64	32.5	94.25	241	1.1	0.68	11.56	4	0.45	247.2	4	14.95	10.4	4	29.72	0	3.92473	1.06377	2.23073	1.20641	86.24	5.92917	0	0	0	0	0	0	0	156	10.49	322	0	0
1	49	144	123	118	74	131	98.5	168	73	92	25.86	90	213.01	83	98.21	44.72	735.1	128.06	403	1.19	0.99	3.9	2	0.54	274	3	19.19	5.9	3	65.73	1	5.50983	1.44537	3.69058	1.15675	142.678	5.45127	0	0	0	1	0	0	0	190	8.45	270	0	0
2	45	124	66	132	69	128	67.5	161	53	86	20.45	58	209.61	59	90.3	91.76	52.3	79.15	207	1.8	0.69	5.62	4	0.33	8.3	1	12.12	4.8	1	32.27	0	5.42188	0.893341	2.6389	2.37351	102.02	5.01221	0	0	0	0	0	0	0	143	5.32	241	0	0
2	42	111	80	117	74	114	77	151	55	87	24.12	67	212.04	61	79.91	47.57	23.5	70.35	301	1.14	0.92	3.97	2	0.4	22.6	2	15.69	5.3	2	58.09	1	5.48474	0.794018	3.89033	1.23047	150.4	4.4355	0	0	0	0	0	0	0	178	4.74	192	0	0
2	37	98	53	90	52	94	52.5	153	35	66	14.95	72	212.45	58	78.67	47.16	128.1	58.96	292	1.11	0.97	5.78	4	0.33	6.4	1	27.46	4.3	1	48.44	0	5.49534	0.665463	3.97046	1.21987	153.498	4.36667	0	0	0	0	0	0	0	130	5.62	269	0	0
2	51	90	56	89	53	89.5	54.5	161	60	77	23.15	66	147.98	67	79.7	43.11	218	52.74	250	1.01	0.67	39.27	4	0.38	7.9	1	14.52	361.1	4	27.97	0	3.82773	0.59526	2.43978	1.11511	94.322	4.42385	0	0	0	0	0	0	0	128	11.63	273	0	0
2	60	172	110	179	98	175.5	104	139	43	82	22.26	78	290.56	49	107.13	54.15	684.7	126.76	281	1.4	1.35	3.27	2	0.39	177.9	4	13.67	5.3	2	84.43	1	7.51578	1.4307	5.45934	1.40067	211.058	5.94638	0	1	0	1	0	0	0	158	11.37	219	1	1
1	76	172	78	161	75	166.5	76.5	158	66	69	26.44	84	286.95	78	106.3	40.72	69	155.57	404	1.25	1.33	8.4	4	0.49	71.6	1	23.37	7.8	4	86.45	1	7.4224	1.75587	5.5643	1.05329	215.116	5.90031	0	1	0	1	0	0	0	201	6.3	174	1	1
2	64	135	76	131	75	133	75.5	160	63.1	91	24.65	68	194.35	67	88.28	65.33	60.7	72.01	285	1.49	0.75	0.94	1	0.39	101	3	16.7	8.4	4	30.15	0	5.02716	0.812754	2.96477	1.68986	114.618	4.90009	0	0	0	0	0	0	0	0	0	0	0	0
1	66	158	68	111	62	134.5	65	167	49	70	17.57	56	213.97	65	91.19	38.3	488.9	100.54	296	1.13	0.99	6.23	4	0.33	306.1	4	19.95	4.6	1	58.33	1	5.53466	1.13476	4.02385	0.990688	155.562	5.06161	0	1	0	0	0	0	0	208	6.47	233	0	0
1	77	164	98	172	88	168	93	157	64.4	98	26.13	69	208.63	102	78.69	38.77	210.9	81.18	372	1.09	0.94	7.19	4	0.28	111.3	1	27.92	7.6	4	51.42	0	5.39653	0.916253	3.97372	1.00285	153.624	4.36778	0	1	0	1	0	0	0	191	5.7	176	0	0
2	42	127	82	120	74	123.5	78	165	86	99	31.59	72	180.56	57	95.47	47.44	11.6	118.97	386	1.22	0.71	3.3	2	0.34	136.9	4	16.52	6.8	3	36.56	0	4.67046	1.34278	2.82788	1.22711	109.326	5.29918	0	0	0	0	0	0	0	166	6.9	222	0	0
1	34	101	66	103	63	102	64.5	165	59.5	75	21.85	63	176.68	70	79.77	49.4	11	48.85	267	1.08	0.73	4.29	3	0.22	367.5	4	14.73	4.6	1	29.93	0	4.5701	0.551354	3.03958	1.27781	117.51	4.42773	0	0	0	0	0	0	0	160	5.14	161	0	0
2	40	113	76	111	73	112	74.5	170	72	84	24.91	86	153.11	66	92.69	56.76	46.6	52.56	268	1.36	0.61	5.19	3	0.39	23.1	2	11.69	5.1	2	23.69	0	3.96042	0.593228	2.22033	1.46818	85.838	5.14487	0	0	0	0	0	0	0	157	8.02	165	0	0
1	30	130	72	131	75	130.5	73.5	177	63	76	20.11	65	226.17	73	97.52	51.41	48.8	77.57	462	1.33	0.98	2.72	2	0.18	252	3	20.22	5.9	3	61.89	1	5.85023	0.875508	4.11914	1.3298	159.246	5.41297	0	0	0	0	0	0	0	173	7.18	264	0	0
2	36	122	82	130	75	126	78.5	151	40	65	17.54	70	171.27	65	68.83	66.98	60.3	76.27	279	1.63	0.66	5.62	4	0.18	61.2	3	14.01	4.5	1	28.18	0	4.43016	0.860835	2.30305	1.73254	89.036	3.82049	0	0	0	0	0	0	0	153	8.84	267	0	0
1	48	151	85	157	81	154	83	0	0	0	20	62	187.56	57	85.71	45.62	157.4	67.29	357	1.11	0.88	2.9	2	0.08	165.3	2	16.45	6.1	3	45.57	0	4.85153	0.759481	3.32338	1.18003	128.482	4.75744	0	0	0	1	0	0	0	167	5.48	302	0	0
2	34	125	66	119	69	122	67.5	150	64	79	28.44	61	143.83	75	74.84	54.84	227	50.62	265	1.13	0.59	4.99	3	0.06	5.4	1	18.03	7.5	4	19.04	0	3.72038	0.571332	2.03999	1.41852	78.866	4.15409	0	0	0	0	0	0	0	133	7.07	234	0	0
1	38	116	83	107	79	111.5	81	177	63	77	20.11	65	200.18	81	79.81	54.6	463.9	137.13	427	1.47	0.85	5.2	3	0.49	435	4	24.26	5.1	2	58.32	1	5.17796	1.54774	3.05623	1.41231	118.154	4.42995	0	0	0	0	0	0	0	178	5.72	209	0	0
2	45	115	64	107	68	111	66	158	47	68	18.83	72	186.8	64	88.87	53.09	157.4	81.46	206	1.36	0.79	5.41	3	0.38	13.7	2	15.73	4.7	1	46.32	0	4.83187	0.919413	3.0372	1.37325	117.418	4.93284	0	0	0	0	0	0	0	142	5.42	241	0	0
1	45	100	64	99	70	99.5	67	168	46.2	70	16.37	55	153.67	76	82.52	49.51	68.4	36.44	250	1.16	0.68	5.68	4	0.22	409.6	4	12.91	4.8	2	26.5	0	3.97491	0.411287	2.50574	1.28065	96.872	4.58037	0	0	0	0	0	0	0	175	5.75	238	0	0
1	38	131	60	115	68	123	64	165	51	70	18.73	59	169.26	76	89.95	56.65	94.3	55.89	366	1.32	0.68	5.03	3	0.25	176.8	2	15.16	4.7	1	27.25	0	4.37817	0.630813	2.62369	1.46534	101.432	4.99278	0	0	0	0	0	0	0	158	6.33	216	0	0
1	34	121	66	122	62	121.5	64	174	65	73	21.47	48	198.37	78	92.66	51.48	59.7	50.43	257	1.23	0.85	3.71	2	0.2	144.8	2	16.42	12.2	4	43.3	0	5.13114	0.569187	3.53864	1.33161	136.804	5.14321	0	0	0	0	0	0	0	165	6.51	202	0	0
2	48	149	127	126	69	137.5	98	160	75	87	29.3	61	180.08	69	104.43	50.32	75.1	101.1	254	1.19	0.73	1.88	1	0.48	137.4	4	12.36	4.9	2	38.26	0	4.65804	1.14108	2.83342	1.3016	109.54	5.79651	0	0	0	1	0	0	0	144	6.38	284	0	0
2	72	166	103	180	101	173	102	156	42.9	75	17.63	101	178.55	66	96.06	62.54	170.2	72.84	270	1.33	0.69	0.09	1	0.33	59.7	3	25.54	9.1	4	26.93	0	4.61847	0.822122	2.62395	1.61769	101.442	5.33193	0	0	0	1	0	0	0	153	10.57	204	0	0
2	41	123	68	121	70	122	69	175	72	81	23.51	61	171.13	58	90.09	41.41	180.1	63.83	293	1.11	0.79	7.23	4	0.88	20.6	2	13.63	7.8	4	38.75	0	4.42654	0.720429	3.02519	1.07113	116.954	5.00056	0	0	0	0	0	0	0	138	4.29	266	0	0
2	48	115	74	118	69	116.5	71.5	0	0	0	20	87	282.24	44	89.85	39.27	181	188.69	390	1.24	1.29	2.15	1	0.45	363.4	4	11.16	6.2	3	90.28	1	7.30057	2.12968	5.30864	1.01578	205.232	4.98723	0	1	0	0	0	0	0	156	6.55	289	1	1
2	50	133	72	123	75	128	73.5	0	0	0	20	64	159.9	59	86.94	47.54	259.9	37.42	266	1.24	0.66	4.48	2	0.37	128.4	4	12.27	4.7	1	27.22	0	4.13606	0.422348	2.71278	1.22969	104.876	4.82571	0	0	0	0	0	0	0	157	5.48	246	0	0
2	32	107	71	104	64	105.5	67.5	128	29	64	17.7	90	154.08	56	71.66	62.48	85.3	47.71	354	1.51	0.58	7.4	4	0.34	137.4	4	17.07	55.3	4	19.28	0	3.98551	0.538488	2.12256	1.61614	82.058	3.97758	0	0	0	0	0	0	0	187	7.56	191	0	0
2	56	155	83	140	80	147.5	81.5	151	53	106	23.24	82	219.38	54	78.6	51.26	79.9	116.35	254	1.37	0.95	2.68	1	0.29	246.1	4	13.5	6.6	3	48.52	0	5.6746	1.31321	3.74677	1.32592	144.85	4.36279	0	0	0	1	0	0	0	155	6.26	225	0	0
1	58	123	58	117	66	120	62	174	78	96	25.76	61	127.05	97	103.81	24.99	302.8	113.75	398	0.89	0.63	0.85	1	0.29	8.8	1	21.33	6	3	33.97	0	3.28634	1.28386	2.05147	0.646405	79.31	5.7621	0	1	0	0	0	0	0	170	6.19	179	0	0
2	29	115	74	123	66	119	70	151	45	70	19.74	79	145.35	53	76.17	38.05	28.6	62.34	192	1.04	0.66	5.33	3	0.41	39.3	2	10.65	5.7	3	27.05	0	3.7597	0.703612	2.45297	0.984221	94.832	4.22791	0	1	0	0	0	0	0	158	6.66	210	0	0
2	40	104	66	99	66	101.5	66	164	62	84	23.05	74	178.62	66	81.69	39.71	260.7	68.18	270	1.07	0.82	4.83	3	0.36	39.8	2	14.77	7.2	4	34.79	0	4.62028	0.769526	3.2404	1.02716	125.274	4.5343	0	1	0	0	0	0	0	146	4.46	271	0	0
2	35	115	72	112	71	113.5	71.5	154	57	82	24.03	70	120.81	59	86.28	38.66	288	42.34	270	1	0.55	4.79	3	0.33	153.9	4	31.35	6.5	3	20.08	0	3.12494	0.477878	1.9059	1	73.682	4.78908	0	1	0	0	0	0	0	154	9.79	276	0	0
2	60	151	83	143	84	147	83.5	166	70	96	25.4	64	178.55	58	97.18	35.16	32.2	207.04	359	1.2	0.76	1.32	1	0.35	244.3	4	19.33	5.7	3	47.5	0	4.61847	2.33679	2.63792	0.909467	101.982	5.39409	1	1	0	1	0	0	0	169	6.93	236	0	0
2	47	121	74	109	74	115	74	0	0	0	20	62	181.74	59	81.03	47.16	64.8	154.42	267	1.46	0.65	5.04	3	0.31	9.3	1	18.18	5.2	2	34.22	0	4.70098	1.74289	2.68226	1.21987	103.696	4.49767	0	0	0	0	0	0	0	138	7.68	256	0	0
2	50	156	70	154	62	155	66	160	67	93	26.17	97	199.62	58	84.92	31.66	166.1	209.36	260	1.12	0.89	4.48	2	0.72	3.9	1	13	5.8	3	63.8	1	5.16348	2.36298	3.26146	0.818934	126.088	4.71359	0	1	0	1	0	0	0	120	8.77	324	0	0
2	46	117	65	115	67	116	66	0	0	0	20	62	181.81	66	92.04	54.54	426.1	34.83	241	1.22	0.78	5.33	3	0.29	69.6	3	12.65	4.6	1	29.33	0	4.70279	0.393115	3.11185	1.41076	120.304	5.10879	0	0	0	0	0	0	0	153	6.81	231	0	0
1	51	0	0	0	0	0	0	175	75	83	24.49	0	221.59	71	85.13	44.38	65.8	131.45	341	1.38	0.94	2.47	1	0.31	334.2	4	22.19	6.5	4	56.41	1	5.73176	1.48363	3.90378	1.14796	150.92	4.72524	0	0	0	0	0	0	0	182	7.31	251	0	0
1	42	107	68	104	76	105.5	72	168	57	73	20.2	51	145.9	73	90.79	35.56	52	92.08	294	1.01	0.63	0.22	1	0.32	329.6	4	14.07	4.4	1	26.61	0	3.77393	1.03928	2.37775	0.919814	91.924	5.03941	0	1	0	0	0	0	0	166	5.69	251	0	0
1	47	120	69	123	68	121.5	68.5	185	66	72	19.28	72	187.77	85	83.15	52.97	233.2	79.58	321	1.33	0.77	5.74	4	0.22	185.1	2	19.47	5.1	2	39.42	0	4.85696	0.898194	3.07512	1.37015	118.884	4.61534	0	0	0	0	0	0	0	172	7.69	214	0	0
2	39	124	64	117	66	120.5	65	160	62	86	24.22	0	189.09	48	83.15	59.35	37.3	67.25	201	1.45	0.75	3.35	2	0.47	2	1	13.94	4.9	2	31.54	0	4.8911	0.759029	3.00802	1.53518	116.29	4.61534	0	0	0	0	0	0	0	123	7.58	344	0	0
2	58	156	69	143	86	149.5	77.5	148	46	66	21	87	215.63	76	107.42	70.67	76.7	66.52	255	1.6	0.81	5.7	4	0.17	52.2	3	18.74	4.9	2	39.91	0	5.5776	0.75079	3.40548	1.82799	131.656	5.96248	0	0	0	1	0	0	0	156	6.2	249	0	0
2	45	155	71	163	83	159	77	160	62	87	24.22	67	150.07	67	95.41	33.66	181.9	212.41	379	1.14	0.59	2.36	1	0.7	108.7	3	15.41	6.1	3	41.23	0	3.88179	2.3974	1.91226	0.870667	73.928	5.29585	1	1	0	1	0	0	0	161	5.11	279	0	0
2	51	134	58	128	60	131	59	160	56	76	21.87	64	228.74	60	96.8	50.39	27.3	162.76	249	1.3	0.92	4.92	3	0.31	130	4	16.23	5.3	2	56.68	1	5.91671	1.83702	3.77129	1.30341	145.798	5.373	0	0	0	0	0	0	0	149	5.56	158	0	0
1	58	106	70	96	62	101	66	164	75	98	27.89	74	200.59	69	224.89	29.91	98.1	242.8	401	1.06	0.87	8.03	4	0.52	208.1	3	14.91	5.7	3	62.5	1	5.18857	2.74041	3.15882	0.773668	122.12	12.4828	0	1	0	0	1	0	0	162	11.68	298	0	0
2	47	147	94	144	89	145.5	91.5	152	67	88	29	118	158.52	52	90.95	34.79	50.4	124.84	297	1.02	0.69	1.41	1	1.69	220.2	4	18.6	5	2	32.82	0	4.10036	1.40903	2.55463	0.899897	98.762	5.04829	0	1	0	1	0	0	0	156	6.73	251	0	0
1	30	130	68	119	66	124.5	67	172	83	95	28.06	62	165.45	79	88.07	34.9	124.6	143.27	416	1.02	0.77	3.77	2	0.33	141.1	2	18.11	5.1	2	42.89	0	4.27962	1.61704	2.6357	0.902742	101.896	4.88843	0	1	0	0	0	0	0	166	8.48	224	0	0
2	26	109	59	120	66	114.5	62.5	155	54	76	22.48	57	150.76	54	67.87	34.74	0	169.21	234	1	0.66	0.78	1	0.51	6.9	1	14.18	4.5	1	39.2	0	3.89964	1.90982	2.12566	0.898603	82.178	3.76721	0	1	0	0	0	0	0	142	6.15	215	0	0
1	69	139	85	138	79	138.5	82	172	77	67	26.03	66	163.65	68	62.48	49.37	0	148.74	341	1.06	0.75	5.51	4	0.67	220.2	3	26.53	6.2	3	41.31	0	4.23306	1.67878	2.18655	1.27703	84.532	3.46803	0	0	0	0	0	0	0	165	7.65	150	0	0
1	40	150	100	140	90	145	95	177	73	88	23.3	60	179.51	89	91.45	45.47	585	87.28	402	1.2	0.78	4.24	2	0.25	274	3	17.57	5	2	37.41	0	4.6433	0.985102	3.01562	1.17615	116.584	5.07604	0	0	0	1	0	1	1	190	6.24	160	0	0
2	56	129	88	119	77	124	82.5	140	50	80	25.51	66	184.09	42	99.13	49.79	61.6	75.06	212	1.21	0.83	1.65	1	0.27	153.4	4	12.59	7.1	4	33.9	0	4.76177	0.847178	3.08557	1.28789	119.288	5.50233	0	0	0	0	0	0	0	162	9.35	212	0	0
2	30	110	70	100	60	105	65	155	48	72	19.98	60	155.73	64	80.8	54.31	152.4	60.78	264	1.2	0.63	5.66	4	0.29	67.6	3	15.44	4.9	2	20.05	0	4.02819	0.686005	2.30895	1.40481	89.264	4.4849	0	0	0	0	0	0	0	174	8.14	287	0	0
2	76	160	110	150	100	155	105	147	44	77	20.36	60	158.99	47	99.96	46.83	80.5	119.33	194	1.3	0.65	3.34	2	0.77	117	3	17.39	5	2	22.61	0	4.11252	1.34684	2.28386	1.21133	88.294	5.5484	1	0	0	1	0	0	0	162	5.36	216	0	0
1	39	120	80	110	70	115	75	184	63	72	18.61	78	134.18	101	98.96	47.48	29.3	78.76	364	1.18	0.58	1.64	1	0.2	120.6	1	19.81	6.6	4	16.25	0	3.47077	0.888939	1.83518	1.22814	70.948	5.4929	0	0	0	0	0	1	1	167	8.3	178	0	0
2	39	130	90	120	80	125	85	161	57	73	21.99	79	190.81	73	92.6	61.79	21.9	93.02	361	1.35	0.75	5.07	3	0.45	24.1	2	26.33	5.6	3	28.17	0	4.93559	1.04989	2.85608	1.59829	110.416	5.13988	0	0	0	0	0	0	0	155	9.65	288	0	0
1	42	110	70	100	60	105	65	172	51	67	17.24	78	148.87	84	86.84	44.01	109.6	83.2	405	1.08	0.69	12.94	4	0.23	100	1	31.57	18.1	4	24.63	0	3.85075	0.939052	2.28195	1.13839	88.22	4.82016	0	0	0	0	0	0	1	191	6.56	205	0	0
1	39	100	70	90	60	95	65	173	63	75	21.05	0	172.92	87	97.32	33.19	977.9	153.98	320	1.03	0.84	2.58	2	0.58	387.9	4	17.71	4.7	1	38.42	0	4.47284	1.73792	2.81774	0.85851	108.934	5.40187	0	1	0	0	0	1	1	178	8.81	216	0	0
1	47	120	80	110	70	115	75	169	76	95	26.61	98	189.7	67	111.56	34.3	46.2	312.47	495	1.04	0.05	5.25	3	0.36	465.2	4	20.12	6.2	3	59.44	1	4.90688	3.52675	2.40316	0.887222	92.906	6.19227	0	1	0	0	0	0	1	183	5.51	276	0	0
2	40	110	80	100	60	105	70	157	54	80	21.91	81	143.26	76	80.21	44.02	41.8	85.8	274	1.09	0.62	1.76	1	0.33	9.3	1	18.03	5.4	2	20.32	0	3.70564	0.968397	2.12312	1.13864	82.08	4.45215	0	0	0	0	0	0	0	140	7.6	261	0	0
2	66	130	90	120	80	125	85	147	36	65	16.66	64	159.69	57	85.66	49.93	17.1	80.15	293	1.14	0.72	4.92	3	0.31	67.6	3	13.17	4.3	1	25.91	0	4.13063	0.904628	2.42447	1.29152	93.73	4.75466	0	0	0	0	0	0	0	137	5.16	238	0	0
2	43	120	80	110	70	115	75	154	59	83	24.88	48	186.93	68	87.71	60.71	752.2	74.87	286	1.4	0.77	1.71	1	0.35	15.2	2	14.95	7.7	4	30.27	0	4.83523	0.845034	2.87755	1.57036	111.246	4.86845	0	0	0	0	0	0	0	168	6.63	214	0	0
1	43	110	80	100	70	105	75	173	63	77	21.05	64	165.09	83	95.9	45.86	94.6	107.02	390	1.2	0.73	0.77	1	0.33	600.9	4	16.96	4.7	1	32.55	0	4.27031	1.2079	2.53042	1.18624	97.826	5.32305	0	0	0	0	0	1	0	144	11.03	244	0	0
2	61	140	105	130	95	135	100	153	55	85	23.5	68	184.09	65	93.02	42.76	102	68.39	397	1.17	0.84	23.35	4	0.23	194	4	13.57	68.4	4	29.71	0	4.76177	0.771896	3.30191	1.10605	127.652	5.16319	0	0	0	1	0	0	0	124	6.99	306	0	0
1	61	130	90	120	80	125	85	171	57	86	19.49	59	161.42	89	110.48	45.85	143.9	56.43	362	1.11	0.76	5.68	4	0.36	231.3	3	25.18	4.6	1	28.83	0	4.17538	0.636907	2.69747	1.18598	104.284	6.13233	0	0	0	0	0	0	0	164	4.85	245	0	0
2	39	160	110	150	105	155	107.5	178	71	97	22.41	72	250.56	67	97.33	52.09	116	134.07	297	1.46	1.21	4.02	2	0.54	24.1	2	17.5	8.4	4	83.54	1	6.48112	1.51321	4.44014	1.34739	171.656	5.40242	0	1	0	1	0	0	0	135	7.32	338	1	1
2	39	150	100	140	95	145	97.5	161	49	75	18.9	65	125.45	55	84.06	52.84	26.1	77.56	262	1.33	0.46	7.86	4	0.41	16.7	2	13.8	13	4	15.76	0	3.24496	0.875395	1.47693	1.36679	57.098	4.66585	0	0	0	1	0	0	0	152	6.82	237	0	0
1	45	130	90	120	80	125	85	165	57	75	20.94	55	207.65	72	78.71	82.92	319	80.52	426	2.02	0.76	1.41	1	0.38	237.7	3	26.03	6.6	4	34.67	0	5.37118	0.908804	2.80978	2.14485	108.626	4.36889	0	0	0	0	0	0	0	163	9.11	314	0	0
2	32	120	70	110	60	115	65	150	39	64	17.33	58	142.43	92	82.36	50.54	294	73.58	283	1.28	0.56	4.17	2	0.48	50.7	3	12.75	4.7	1	18.4	0	3.68417	0.830474	1.99622	1.30729	77.174	4.57149	0	0	0	0	0	0	0	162	10.01	370	0	0
1	42	120	80	110	70	115	75	180	88	105	27.16	47	178.12	85	85	29.32	57.8	141.75	405	0.98	0.8	1.41	1	0.31	463.6	4	16.92	4.6	1	41.77	0	4.60735	1.59989	3.11562	0.758407	120.45	4.71803	0	1	0	0	0	1	0	189	6.26	175	0	0
1	46	140	105	130	90	135	97.5	173	52	85	17.37	59	135.5	64	0.03	52.66	105.8	82.1	319	1.22	0.56	4.96	3	0.36	97.4	1	16.27	4.6	1	20.01	0	3.50491	0.926637	1.71805	1.36213	66.42	0.00166519	0	1	0	1	0	1	1	169	6.54	203	0	0
1	43	140	80	130	70	135	75	183	90	98	26.87	58	110.68	78	96.15	18.59	67.7	117.58	358	0.73	0.64	1.29	1	0.86	109.2	1	20.76	5	2	34.73	0	2.86291	1.32709	1.77377	0.480859	68.574	5.33692	0	1	0	0	0	0	0	174	6.06	247	0	0
1	45	120	90	110	70	115	80	162	55	80	20.96	58	158.99	69	84.93	47.71	455.3	78.86	264	1.29	0.7	0.22	1	0.4	280.2	3	37.65	5.5	3	24.58	0	4.11252	0.890068	2.47046	1.23409	95.508	4.71414	0	0	0	0	0	1	0	154	5.36	375	0	0
1	40	110	80	100	70	105	75	172	60	87	20.28	58	153.59	75	93.72	58.46	78.9	86.82	303	1.34	0.59	5.68	4	0.26	155.5	2	17.86	5.1	2	22.77	0	3.97284	0.97991	2.01154	1.51216	77.766	5.20204	0	0	0	0	0	1	1	178	6.24	273	0	0
2	42	120	80	110	70	115	75	158	55	83	22.03	59	173.69	78	78.61	35.31	19.3	115.91	369	1	0.83	3.78	2	0.16	29	2	16.42	5.5	3	48.18	0	4.49276	1.30824	2.97977	0.913347	115.198	4.36334	0	1	0	0	0	0	0	110	4.2	150	0	0
2	66	130	80	120	70	125	75	143	39	83	19.07	58	230.04	63	86.11	66.33	96.2	68.39	311	1.48	0.95	4.92	3	0.66	159.3	4	17.96	6.7	3	40.96	0	5.95034	0.771896	3.88081	1.71573	150.032	4.77964	0	0	0	0	0	0	0	154	7.08	269	0	0
2	58	140	100	130	90	135	95	146	38	85	17.83	58	214.65	67	86.63	67.69	136.3	118.32	238	1.66	0.83	4.64	3	0.64	153.9	4	15.87	5.2	2	41.01	0	5.55225	1.33544	3.18924	1.75091	123.296	4.8085	0	0	0	1	0	0	0	168	6.28	191	0	0
2	55	110	80	100	70	105	75	156	46	73	18.9	56	173.83	59	86.74	50.88	49.1	93.12	243	1.24	0.72	4.76	3	0.36	79.2	3	17.39	5.3	2	27.16	0	4.49638	1.05102	2.69855	1.31609	104.326	4.81461	0	0	0	0	0	0	0	151	5.19	217	0	0
1	42	140	90	130	80	135	85	170	97	111	33.56	74	222.97	80	102.01	28.06	26.4	343.23	394	1.04	0.97	2.04	1	0.31	475.5	4	18.14	3.5	1	73.84	1	5.76746	3.87393	3.26601	0.725815	126.264	5.66219	0	1	0	0	0	1	1	164	6.22	289	0	0
1	56	120	80	110	70	115	75	178	64	77	20.2	72	193.24	83	92.78	42.42	101.3	92.2	272	1.16	0.88	2.48	1	0.24	142.7	2	18.63	8.3	4	36.53	0	4.99845	1.04063	3.42421	1.09726	132.38	5.14987	0	0	0	0	0	1	0	165	7	158	0	0
1	59	140	90	130	80	135	85	171	61	91	20.86	55	206.47	71	88.23	36.49	267.5	108.69	352	1.04	1	1.65	1	0.37	336.9	4	18.91	4.9	2	58.19	1	5.34066	1.22675	3.83451	0.94387	148.242	4.89731	1	1	0	1	0	1	0	164	5.95	184	0	0
1	58	140	100	130	90	135	95	171	59	87	20.18	69	219.37	61	90.59	55.65	18.4	90.25	338	1.39	0.95	2.34	1	0.32	143.2	2	22.42	6.7	4	47.6	0	5.67434	1.01862	3.76798	1.43947	145.67	5.02831	1	0	0	1	0	1	0	168	5.85	219	0	0
1	44	120	80	110	70	115	75	157	53	78	21.5	67	165.16	94	92.15	58.23	52.7	74.88	422	1.54	0.67	3.34	2	0.31	323.6	4	19.91	5.4	3	31.76	0	4.27212	0.845147	2.37853	1.50621	91.954	5.1149	0	0	0	0	0	0	0	175	7.53	247	0	0
1	46	140	105	130	95	135	100	167	62	80	22.23	58	152.13	78	95.69	61.77	20.3	50.79	363	1.38	0.63	3.93	2	0.2	87.8	1	17.32	4.7	1	22.19	0	3.93508	0.573251	2.07455	1.59778	80.202	5.31139	0	0	0	1	0	1	0	162	6.43	196	0	0
2	46	130	90	120	80	125	85	165	72	95	26.45	53	174.73	94	89.27	41.1	50.4	113.41	384	1.09	0.79	4.73	3	0.95	28	2	15.73	6	3	42.93	0	4.51966	1.28002	2.86984	1.06311	110.948	4.95504	0	0	0	0	0	0	0	157	6.09	274	0	0
1	58	130	90	120	80	125	85	172	55	83	18.59	55	202.87	58	98.44	67.86	233.8	77.01	294	1.71	0.86	0.61	1	0.36	209.8	3	22.75	6	3	38.65	0	5.24754	0.869187	3.09384	1.7553	119.608	5.46403	0	0	0	0	0	1	1	186	6.16	197	0	0
1	49	160	110	150	100	155	105	168	83	102	29.41	58	169.81	87	120.21	42.65	17.4	79.79	451	1.17	0.78	11.32	4	0.56	472.3	4	19.12	6.4	4	31.57	0	4.3924	0.900564	2.87641	1.10321	111.202	6.6724	0	0	0	1	0	0	0	169	6.47	128	0	0
2	45	140	100	130	90	135	95	157	44	85	17.85	58	140.97	66	83.26	60.44	153.6	67.1	271	1.27	0.55	3.74	2	0.29	15.2	2	14.21	4.5	1	18.37	0	3.6464	0.757336	1.7359	1.56337	67.11	4.62145	0	0	0	1	0	0	0	142	5.37	161	0	0
2	36	120	80	110	70	115	75	159	62	76	24.52	63	159.41	66	91.04	41.94	38.2	135.18	210	1.13	0.71	4.4	2	0.16	26.5	2	14.56	4.9	2	44.1	0	4.12338	1.52573	2.33921	1.08484	90.434	5.05329	0	0	0	0	0	0	0	150	7.96	283	0	0
2	51	140	80	130	70	135	75	163	58	83	21.83	67	155.11	61	80.21	65.92	163	70.43	264	1.51	0.56	2.78	1	0.47	49.7	3	15.02	5.1	2	18.66	0	4.01216	0.794921	1.94268	1.70512	75.104	4.45215	0	0	0	0	0	0	0	153	7.45	209	0	0
1	61	140	100	130	90	135	95	161	50	81	19.29	58	195.04	57	106.08	52.09	363.6	81.55	267	1.21	0.84	4.14	2	0.35	262.3	3	15.84	5.3	3	38.9	0	5.04501	0.920429	3.27574	1.34739	126.64	5.8881	0	0	0	1	0	1	0	167	7.13	242	0	0
1	36	120	80	110	70	115	75	160	64	86	25	58	238.84	88	101.49	32.4	45	178.16	243	1.01	1.11	2.75	2	0.18	134.8	2	18.91	5.5	3	82.5	1	6.17796	2.01084	4.41821	0.838076	170.808	5.63333	0	1	0	0	0	1	0	173	8.84	226	0	1
1	64	140	90	130	80	135	85	161	56	84	21.6	58	182.77	76	84.86	39.73	125.9	92.02	290	1.15	0.89	3.88	2	0.46	94.9	1	20.52	5.5	3	41.33	0	4.72763	1.0386	3.2239	1.02768	124.636	4.71026	0	1	0	0	0	1	0	167	8.88	212	0	0
2	39	130	80	120	70	125	75	164	53	75	19.71	58	145.83	53	97.78	41.94	185.9	58.11	191	1.04	0.68	5.31	3	0.31	14.7	2	14.59	4.7	1	27.61	0	3.77212	0.655869	2.38665	1.08484	92.268	5.4274	0	0	0	0	0	0	0	139	5.48	232	0	0
2	56	150	100	140	90	145	95	153	55	104	23.5	66	177.92	59	88.44	47.7	46.9	60.7	180	1.11	0.79	4.14	2	0.31	164.2	4	15.27	5.1	2	23.43	0	4.60217	0.685102	3.05432	1.23383	118.08	4.90897	0	0	0	1	0	0	0	170	5.59	164	0	0
2	45	120	80	110	70	115	75	158	50	80	20.03	58	169.39	61	84.41	58.62	122.7	60.14	215	1.36	0.72	0.86	1	0.39	34.9	2	9.81	5.6	3	24.04	0	4.38153	0.678781	2.55411	1.5163	98.742	4.68528	0	0	0	0	0	0	0	148	6.3	250	0	0
2	57	110	70	100	60	105	65	142	41	77	20.33	59	138.48	58	87.64	41.24	78	128.97	295	1.23	0.63	3.25	2	0.24	362.7	4	15.95	6.4	3	29.79	0	3.582	1.45564	1.84806	1.06674	71.446	4.86456	0	0	0	0	0	0	0	149	6.69	198	0	0
2	43	130	90	120	80	125	85	147	43	68	19.9	58	160.86	57	197.43	63.17	62.6	57.92	231	1.5	0.64	3.88	2	0.3	72.7	3	9.43	12.8	4	17.98	0	4.16089	0.653725	2.22726	1.63399	86.106	10.9586	0	0	1	0	1	0	0	156	9.14	281	0	0
2	75	170	110	150	100	160	105	148	38	82	17.35	81	175.56	55	85.21	56.2	55.2	76.18	269	1.19	0.76	6.11	4	0.92	72.7	3	16.96	12.1	4	24.89	0	4.54113	0.859819	2.69333	1.4537	104.124	4.72968	0	0	0	1	0	0	0	165	5.55	268	0	0
2	67	130	80	120	70	125	75	166	55	80	19.96	66	248.48	72	87.02	47.72	18.1	192.15	262	1.43	1.09	2.56	1	0.4	272.7	4	18.18	5.9	3	75.06	1	6.42732	2.16874	4.19891	1.23435	162.33	4.83015	0	1	0	0	0	0	0	154	7.24	262	1	1
2	44	140	100	130	90	135	95	154	83	100	35	64	177.16	50	104.48	41.62	86.3	146.32	342	1.25	0.77	5.26	3	0.3	127.4	4	12.3	5.4	2	42.68	0	4.58251	1.65147	2.74899	1.07656	106.276	5.79929	0	0	0	1	0	0	0	160	7.4	409	0	0
1	60	100	80	90	60	95	70	168	58	78	20.55	56	132.8	69	81.67	56.25	501	47.39	289	1.17	0.57	1.16	1	0.18	148	2	17.07	5.4	3	15.06	0	3.43508	0.534876	1.73492	1.45499	67.072	4.53319	0	0	0	0	0	1	0	172	9.08	348	0	0
1	46	140	90	130	80	135	85	176	90	97	29.05	80	189.98	67	96.77	27.79	22.5	502.49	521	1.16	0.7	5.04	3	0.35	409.6	4	15.73	5.9	3	48.98	0	4.91412	5.67144	1.59576	0.718831	61.692	5.37134	1	1	0	1	0	0	1	176	6.73	176	0	0
1	38	140	90	130	80	135	85	158	56	75	22.43	60	234.21	58	95.83	47.55	460	319.82	305	1.52	0.95	0.64	1	0.25	199.1	2	21.13	5.6	3	73.3	1	6.0582	3.60971	3.17372	1.22995	122.696	5.31916	0	1	0	0	0	1	0	184	5.75	177	0	0
2	55	160	90	150	80	155	85	157	56	86	22.72	58	168.29	53	115.76	67.01	283.3	69.62	329	1.54	0.61	4.4	2	0.35	180.6	4	11.13	10.3	4	22.59	0	4.35308	0.785779	2.2596	1.73332	87.356	6.4254	0	0	0	1	0	0	0	153	5.35	219	0	0
1	38	110	80	100	75	105	77.5	171	66	84	22.57	59	174.8	77	86.08	65.02	104.2	92.96	386	1.45	0.64	5.4	4	0.27	163.1	2	17.21	4.5	1	27.93	0	4.52147	1.04921	2.35872	1.68184	91.188	4.77798	0	0	0	0	0	1	0	159	7.63	243	0	0
1	43	100	70	100	60	100	65	163	46	69	17.31	63	135.15	65	95.56	50.68	96.5	82.68	250	1.27	0.55	4.41	3	0.45	151.8	2	15.77	4.6	1	17.14	0	3.49586	0.933183	1.75722	1.31092	67.934	5.30417	0	0	0	0	0	1	0	174	8.78	200	0	0
1	52	110	70	90	60	100	65	159	65	96	25.71	67	230.18	71	97.95	48.26	201.7	116.77	403	1.4	1.09	8.94	4	0.4	43.8	1	26.99	9.2	4	51.99	0	5.95396	1.31795	4.10155	1.24832	158.566	5.43683	0	0	0	0	0	1	0	193	6.73	136	0	0
2	42	140	90	130	80	135	85	159	62	80	24.52	0	156.99	63	95.59	50.28	583	87.03	253	1.36	0.64	2.62	1	0.24	33.9	2	9.56	7.6	4	22.17	0	4.06079	0.98228	2.30998	1.30057	89.304	5.30584	0	0	0	0	0	0	0	138	8.34	227	0	0
1	41	110	80	100	70	105	75	165	60	82	22.04	48	148.19	69	86.15	50.54	20.3	40.35	329	1.22	0.64	5.72	4	0.13	190.6	2	15.19	4.7	1	19.62	0	3.83316	0.455418	2.31712	1.30729	89.58	4.78186	0	0	0	0	0	1	0	167	6.53	245	0	0
1	55	160	90	140	80	150	85	162	56	74	21.34	53	168.98	76	101.08	46.54	132.8	80	303	1.19	0.82	2.2	1	0.22	237.7	3	22.29	8.8	4	29.47	0	4.37093	0.902935	2.75323	1.20383	106.44	5.61057	0	0	0	1	0	1	1	171	9.28	204	0	0
1	43	160	110	150	100	155	105	170	72	101	24.91	56	245.43	91	156.04	17.29	880.9	602.35	472	0.88	0.95	4.16	2	0.45	54.7	1	15.19	5.3	3	65.42	1	6.34842	6.79853	2.78505	0.447232	107.67	8.66119	0	1	0	1	1	1	0	217	9.65	205	1	0
2	40	130	90	120	80	125	85	149	63	75	28.38	59	176.95	65	72.99	45.55	326	102.6	245	1.21	0.77	4.09	2	0.28	22.1	2	12.4	9.7	4	32.68	0	4.57708	1.15801	2.86808	1.17822	110.88	4.0514	0	0	0	0	0	0	0	163	5.87	191	0	0
2	55	130	90	120	80	125	85	150	57	85	25.33	56	183.05	60	101.63	69.24	149.6	54.71	319	1.61	0.73	0.52	1	0.57	166.9	4	15.66	5.5	3	22.89	0	4.73487	0.617494	2.66084	1.791	102.868	5.6411	0	0	0	0	0	0	0	176	8.77	236	0	0
1	59	150	105	140	95	145	100	170	63	90	21.8	57	202.95	82	96.56	51.14	571.6	60.17	280	1.35	1.01	2.94	2	0.42	215	3	22.02	5.1	2	30.96	0	5.24961	0.67912	3.61552	1.32281	139.776	5.35968	0	0	0	1	0	1	1	173	8.95	212	0	0
1	42	150	100	140	90	145	95	160	55	86	21.48	58	209.88	62	102.92	105.99	21.3	46.46	320	2.31	0.64	3.33	2	0.43	433.5	4	13.77	8.3	4	20.7	0	5.42887	0.524379	2.44692	2.74159	94.598	5.7127	0	0	0	1	0	1	0	152	5.26	238	0	0
1	49	130	90	120	80	125	85	179	102	112	31.83	59	205.44	67	88.86	28.88	39.8	238.21	572	0.94	1.01	11.46	4	0.4	137.4	2	23.87	8.2	4	65.97	1	5.31402	2.6886	3.33466	0.747025	128.918	4.93228	0	1	0	0	0	1	0	210	6.5	246	0	0
2	54	128	86	125	85	126.5	85.5	162	52	70	19.81	70	240.1	65	117.88	44.15	362.8	159.66	297	1.24	1.17	2.55	1	0.39	105.6	3	13.2	5.1	2	73.13	1	6.21055	1.80203	4.24258	1.14201	164.018	6.54307	0	1	0	0	0	0	0	153	7.08	251	0	1
1	39	120	80	110	70	115	75	165	56	75	20.57	58	156.51	73	85.35	65.75	232.7	64.25	395	1.49	0.6	3.97	2	0.21	138.5	2	21.69	6.1	3	22.07	0	4.04837	0.725169	2.01526	1.70072	77.91	4.73746	0	0	0	0	0	0	0	177	7.11	181	0	0
1	62	120	80	110	70	115	75	170	60	85	20.76	60	161.84	73	93.16	69.42	163	51.47	247	1.57	0.63	2.94	2	2.22	222.5	3	14.35	9.1	4	20.24	0	4.18624	0.580926	2.12431	1.79565	82.126	5.17096	0	0	0	0	0	0	0	159	5.91	154	0	0
1	72	90	60	80	50	85	55	175	62	90	20.24	130	102.3	64	100.35	28.51	243.6	90.93	444	0.89	0.51	1.95	1	0.3	157.7	2	19.6	4.5	1	17.6	0	2.64615	1.0263	1.43828	0.737455	55.604	5.57005	0	1	0	0	0	1	0	141	13.63	193	0	0
1	44	110	80	100	70	105	75	166	66	80	23.95	49	193.73	75	84.83	41	107.4	86.02	325	1.05	0.92	5.19	3	0.26	223.7	3	18.49	4.7	1	43.22	0	5.01112	0.97088	3.50559	1.06053	135.526	4.70859	0	0	0	0	0	1	0	166	5.73	183	0	0
1	38	140	90	130	80	135	85	160	54	80	21.09	52	173.07	84	116.6	58.28	28	92.5	364	1.47	0.73	0.32	1	0.2	224.3	3	15.95	5.7	3	35.89	0	4.47672	1.04402	2.49069	1.5075	96.29	6.47202	0	0	0	0	0	0	0	176	7.4	267	0	0
2	53	140	90	130	80	135	85	158	73	90	29.24	77	157.89	62	88.47	38.2	52.7	139.38	362	1.08	0.7	4.6	3	0.46	73.7	3	17.21	6.5	3	37.03	0	4.08407	1.57314	2.37491	0.988101	91.814	4.91063	0	1	0	0	0	0	0	150	7.5	273	0	0
1	37	90	60	80	70	85	65	172	57	77	19.27	43	151.93	88	91.29	34.12	238.9	111.59	348	0.89	0.79	5.63	4	0.31	578.5	4	10.4	5.3	3	46.98	0	3.9299	1.25948	2.47005	0.882566	95.492	5.06716	0	1	0	0	0	0	0	178	5.9	181	0	0
2	37	120	85	110	75	115	80	164	54	72	20.08	68	181.19	66	86.43	59.55	51.7	105.66	231	1.53	0.72	4.93	3	0.32	1	1	15.62	5.1	2	29.99	0	4.68676	1.19255	2.59979	1.54035	100.508	4.7974	0	0	0	0	0	0	0	107	8.72	318	0	0
2	68	150	110	140	100	145	105	150	44	73	19.56	97	144.93	45	84.79	41.28	171.1	80.18	213	1.1	0.63	11.42	4	0.59	250.8	4	11.81	25.3	4	29.59	0	3.74884	0.904966	2.26627	1.06777	87.614	4.70637	0	0	0	1	0	0	0	146	5.6	181	0	0
2	45	120	85	110	75	115	80	154	49	70	20.66	60	146.8	62	87.4	55.54	18.1	83.61	88	1.2	0.58	5.01	3	0.29	9.3	1	12.75	4.7	1	21.98	0	3.79721	0.943679	1.92804	1.43663	74.538	4.85124	0	0	0	0	0	0	0	145	7.05	225	0	0
1	41	115	75	105	66	110	70.5	153	46	68	19.65	56	162.81	69	81.04	86.43	22.2	55.54	335	1.74	0.55	4.54	3	0.17	387.2	4	18	4.8	2	18	0	4.21133	0.626862	1.68836	2.23564	65.272	4.49822	0	0	0	0	0	0	0	176	9.47	217	0	0
1	57	165	115	155	106	160	110.5	155	56.5	80	23.52	85	145.69	73	82.61	65.12	152.7	69.9	283	1.48	0.54	5.31	3	0.19	247.8	3	13.07	4.5	1	18.5	0	3.76849	0.788939	1.72245	1.68443	66.59	4.58537	1	0	0	1	0	0	1	186	5.21	161	0	0
1	46	128	88	118	78	123	83	171	59	77	20.18	65	126.49	74	94.86	49.94	430	83.61	335	1.15	0.58	9.02	4	0.6	204.1	3	21.69	6.2	3	19.82	0	3.27186	0.943679	1.54754	1.29177	59.828	5.26532	1	0	0	1	0	1	1	164	5.73	295	0	0
1	48	131	91	121	82	126	86.5	170	49	68	16.96	60	155.05	67	75.73	49.34	460.6	79.9	302	1.21	0.7	4.6	3	0.09	182.8	2	14.18	4.5	1	28.17	0	4.01061	0.901806	2.321	1.27625	89.73	4.20349	0	0	0	0	0	1	1	160	5.29	218	0	0
2	31	108	76	100	64	104	70	170	65	80	22.49	49	143.13	64	106.18	39.39	124.9	102.41	218	1.05	0.67	5.5	4	0.37	2.5	1	11.22	4.7	1	38.11	0	3.70228	1.15587	2.1536	1.01888	83.258	5.89365	0	1	0	0	0	0	0	98	7.65	297	0	0
1	58	120	85	115	76	117.5	80.5	166	54.5	77	19.78	50	185.55	72	72.99	69.65	47.5	92.78	317	1.61	0.74	4.12	2	0.36	151.2	2	19.33	5.6	3	29.77	0	4.79953	1.04718	2.51795	1.8016	97.344	4.0514	1	0	0	1	0	1	1	153	4.36	191	0	0
2	50	142	102	136	93	139	97.5	150	43	63	19.11	57	148.12	60	78.33	57.62	655.7	65.73	245	1.34	0.56	5.16	3	0.22	59.2	3	13.67	6	3	17.05	0	3.83135	0.741874	2.00088	1.49043	77.354	4.3478	0	0	0	1	0	0	0	162	12.04	223	0	0
2	45	120	76	112	68	116	72	154	46.5	68	19.61	62	161.22	69	91.01	65.93	262	49.52	282	1.47	0.62	3.89	2	0.22	72.7	3	12.65	4.8	1	16.98	0	4.1702	0.558916	2.20864	1.70538	85.386	5.05162	0	0	0	0	0	0	0	160	8.45	303	0	0
2	31	110	78	105	66	107.5	72	166	46.5	65	16.87	76	159.9	64	97.78	55.01	15.8	67.21	216	1.34	0.67	1.45	1	0.87	68.1	3	11.75	7.2	4	21.2	0	4.13606	0.758578	2.36544	1.42292	91.448	5.4274	0	0	0	0	0	0	0	136	6.43	347	0	0
2	41	150	99	155	95	152.5	97	155	66	83	27.47	78	189.17	54	87.16	46.3	248	108.47	168	1.29	0.84	1.52	1	0.49	9.8	1	16.96	6.4	3	51.63	0	4.89317	1.22427	3.1344	1.19762	121.176	4.83792	1	0	0	1	0	0	0	149	6.34	264	0	0
2	58	115	78	117	80	116	79	154	52	80	21.93	89	191.26	56	71.25	38.67	16.8	126.72	322	1.06	0.89	2.91	2	0.24	140	4	11.27	8.6	4	39.82	0	4.94723	1.43025	3.29141	1.00026	127.246	3.95482	0	1	0	0	0	0	0	143	6.2	250	0	0
1	78	135	64	130	80	132.5	72	156	49	80	20.13	89	140.17	68	83.44	45.47	88.2	59.56	238	1.11	0.6	5.01	3	0.13	230.1	3	0.26	4.5	1	16.06	0	3.62571	0.672235	2.14144	1.17615	82.788	4.63144	0	0	0	0	0	1	0	167	5.25	176	0	0
2	81	165	90	160	90	162.5	90	149	45	85	20.27	78	228.2	63	111.64	73.93	112.2	91.24	299	1.93	0.91	3.65	2	0.75	280.2	4	25.47	6.5	3	40.05	0	5.90274	1.0298	3.51842	1.91231	136.022	6.19671	0	0	0	1	0	0	0	159	4.81	185	0	0
2	43	125	75	120	70	122.5	72.5	151	46	65	20.17	78	200.89	61	87.64	63.74	547.7	72.99	273	1.53	0.84	4.02	2	0.28	10.3	1	15.91	6.7	3	34.14	0	5.19633	0.823815	3.16999	1.64873	122.552	4.86456	0	0	0	0	0	0	0	130	4.82	275	0	0
2	46	152	100	150	99	151	99.5	157	60	84	24.34	77	170.88	58	80.14	61.2	95.3	96.15	246	1.67	0.7	4.26	2	0.42	4.4	1	18.39	5.1	2	32.44	0	4.42007	1.08521	2.33963	1.58303	90.45	4.44827	0	0	0	1	0	0	0	173	5.64	211	0	0
1	46	123	76	120	80	121.5	78	167	62	88	22.23	64	201.76	69	86.67	45.6	80.5	88.61	258	1.17	0.91	5.63	4	0.38	226.6	3	20.05	5	2	42.8	0	5.21883	1.00011	3.58091	1.17951	138.438	4.81072	0	0	0	0	0	0	0	171	8.43	321	0	0
2	35	120	90	110	80	115	85	155	53	84	22.06	76	190.32	65	98.37	55.52	377.6	61.2	318	1.33	0.82	79.91	4	0.4	92.3	3	11.51	381.7	4	31.86	0	4.92292	0.690745	3.1702	1.43611	122.56	5.46015	0	0	0	0	0	0	0	169	10.05	335	0	0
1	56	120	80	110	70	115	75	164	66	90	24.54	60	157.4	65	98.27	27.95	109.3	133.73	250	0.93	0.8	3.21	2	0.35	373.1	4	20.72	4.8	2	42.51	0	4.07139	1.50937	2.6566	0.722969	102.704	5.4546	0	1	0	0	0	1	0	207	7.26	153	0	0
1	65	120	80	110	70	115	75	164	47	72	17.47	60	165.51	62	87.65	66.42	18.7	37.85	285	1.46	0.66	3.54	2	0.18	247.2	3	15.48	5.1	2	18.44	0	4.28117	0.427201	2.3673	1.71805	91.52	4.86512	0	0	0	0	0	0	0	170	6.25	304	0	0
2	68	160	110	155	100	157.5	105	146	60	86	28.15	60	209.8	66	96.08	35.4	205.3	136.04	304	1.04	0.99	3.34	2	1.1	423.7	4	15.41	5.6	3	46.84	0	5.4268	1.53544	3.80735	0.915675	147.192	5.33304	1	1	0	1	0	0	0	178	8.3	205	0	0
2	48	120	70	110	65	115	67.5	156	61	87	25.07	56	228.24	59	86.43	46.15	51.7	97.6	286	1.26	0.97	2.2	1	0.38	49.7	3	11.13	5.1	2	41.31	0	5.90378	1.10158	4.20512	1.19374	162.57	4.7974	0	1	0	0	0	0	0	160	3.58	196	0	1
2	35	110	80	100	60	105	70	168	63	80	22.32	60	135.01	62	92.78	48.98	59.7	40.54	198	1.16	0.57	5.45	4	0.41	8.8	1	18.98	4.8	1	20.4	0	3.49224	0.457562	2.01557	1.26694	77.922	5.14987	0	0	0	0	0	0	0	106	5.64	268	0	0
2	36	110	70	90	60	100	65	157	51	83	20.69	69	177.78	71	93.27	41.85	109.3	102.51	248	1.07	0.86	28.75	4	0.54	23.1	2	14.95	100	4	47.08	0	4.59855	1.157	2.98572	1.08251	115.428	5.17706	0	0	0	0	0	0	0	150	7.86	330	0	0
1	34	120	70	110	65	115	67.5	178	85	59	26.83	60	205.78	77	99	42.08	71.6	115.11	433	1.12	0.92	2.74	2	0.24	10.3	1	20.32	4.5	1	53.34	0	5.32281	1.29921	3.63885	1.08846	140.678	5.49512	0	0	0	0	0	1	0	129	5.69	354	0	0
2	40	130	90	120	80	125	85	153	44	66	18.8	61	178.89	56	103.41	69.83	52.7	53.97	156	1.58	0.73	5.13	3	0.27	2.5	1	12.55	5.8	3	27.83	0	4.62726	0.609142	2.5418	1.80626	98.266	5.7399	0	0	0	0	0	0	0	99	7.2	360	0	0
2	61	110	80	100	70	105	75	154	44	85	18.55	60	140.28	64	79.38	47.87	177	70.74	225	1.14	0.62	5.86	4	0.56	43.8	3	16.34	5.3	2	20.48	0	3.62856	0.79842	2.02437	1.23823	78.262	4.40608	0	0	0	0	0	0	0	152	4.27	159	0	0
1	42	130	90	120	80	125	85	161	54	74	20.83	60	138.62	64	66.12	60.66	324.3	72.22	261	1.44	0.55	7.45	4	0.42	270.9	3	17.89	10.7	4	19.88	0	3.58562	0.815124	1.64294	1.56906	63.516	3.67007	0	0	0	0	0	1	0	159	8.61	223	0	0
2	37	140	90	120	80	130	85	142	45	75	22.32	60	150.06	59	84.73	45.03	54.9	59.72	247	1.2	0.71	5.2	3	0.43	5.4	1	15.23	4.9	2	37.56	0	3.88153	0.674041	2.40781	1.16477	93.086	4.70304	0	0	0	0	0	0	0	128	8	334	0	0
2	64	150	105	140	95	145	100	164	67	65	24.91	60	211.54	41	87.79	37.18	80.2	117.89	275	0.95	0.97	5.13	3	0.43	285.2	4	19.05	4.3	1	47.15	0	5.47181	1.33059	3.90021	0.961718	150.782	4.87289	0	1	0	1	0	0	0	153	4.93	295	0	0
2	41	130	90	120	80	125	85	160	49	71	19.14	74	136.89	71	86.15	56.86	38.9	68.24	222	1.32	0.54	5.16	3	0.2	7.9	1	13.07	4.7	1	17.8	0	3.54087	0.770203	1.71707	1.47077	66.382	4.78186	0	0	0	0	0	0	0	142	7.51	375	0	0
1	35	120	90	110	80	115	85	167	86	79	30.84	60	154.49	79	97.13	37.58	326.4	87.04	346	0.99	0.7	2.17	1	0.41	201.3	3	16.67	5.1	2	29.93	0	3.99612	0.982393	2.57377	0.972064	99.502	5.39132	0	1	0	0	0	0	0	158	6.64	259	0	0
2	33	110	70	90	60	100	65	160	59	86	23.05	60	162.05	60	77.58	40.85	130	50.36	311	1.05	0.74	4.54	2	0.54	64.6	3	14.11	4.9	2	29.16	0	4.19167	0.568397	2.8745	1.05665	111.128	4.30617	0	0	0	0	0	0	0	185	6.52	209	0	0
2	37	110	70	90	60	100	65	152	40	69	17.31	80	190.95	50	86.85	72.29	457.7	50.36	198	1.58	0.68	5.03	3	0.22	3.9	1	11.9	4.8	1	30.65	0	4.93921	0.568397	2.80879	1.86989	108.588	4.82071	0	0	0	0	0	0	0	178	7.61	236	0	0
1	34	110	70	100	60	105	65	174	68	88	22.46	60	251.19	87	88.31	56.02	137.9	298.07	431	1.57	1.07	3.69	2	0.56	963.3	4	20.66	6.6	4	78.04	1	6.49741	3.36422	3.50636	1.44904	135.556	4.90175	0	1	0	0	0	1	0	121	5.85	277	1	0
2	46	120	80	110	70	115	75	166	60	81	21.77	60	154.7	70	83.93	46.65	139.8	48.05	339	1.06	0.67	4.32	2	0.34	121.1	4	15.16	6.3	3	21.74	0	4.00155	0.542325	2.5463	1.20667	98.44	4.65864	0	0	0	0	0	0	0	189	5.42	182	0	0
1	30	110	80	100	70	105	75	163	59	75	22.21	60	162.88	76	87.51	59.79	188.7	185.14	318	1.47	0.65	5.15	3	0.31	569.4	4	15.27	6.3	4	37.39	0	4.21314	2.08962	1.70879	1.54656	66.062	4.85735	1	0	0	1	0	0	1	165	7.91	189	0	0
1	52	120	70	110	60	115	65	171	62	80	21.2	60	188.8	71	100.49	47.3	78.9	92.05	298	1.18	0.82	3.71	2	0.35	220.2	3	20.45	4.7	1	40.11	0	4.8836	1.03894	3.18391	1.22349	123.09	5.57782	0	0	0	0	0	1	0	164	5.55	204	0	0
1	65	120	90	110	70	115	80	159	41	81	16.22	77	130.65	77	85.49	44.42	172.7	47.21	317	1.11	0.61	1.47	1	0.21	72.2	1	16.96	4.7	1	17.38	0	3.37946	0.532844	1.98624	1.14899	76.788	4.74523	0	0	0	0	0	1	0	182	9.61	204	0	0
1	43	130	90	120	80	125	85	167	66	89	23.67	58	226.58	79	87.23	35.74	70.6	276.85	435	1.25	1	2.77	2	0.39	217.3	3	21.23	7.5	4	60.75	1	5.86084	3.12472	3.50414	0.92447	135.47	4.84181	0	1	0	0	0	0	0	212	8.91	268	0	0
1	56	160	110	155	105	157.5	107.5	178	74	85	23.36	82	164.61	76	161.22	41.23	409	146.14	700	1.24	0.83	18.71	4	0.48	508.3	4	30.22	5.6	3	39.1	0	4.25789	1.64944	2.43539	1.06648	94.152	8.94871	0	0	0	1	1	1	0	169	11.31	309	0	0
1	38	120	70	110	65	115	67.5	177	59	79	18.83	58	141.81	59	78.9	65.17	48.2	47.4	412	1.5	0.57	30.54	4	0.28	199.6	2	18.18	17.7	4	13.8	0	3.66813	0.534989	1.7372	1.68572	67.16	4.37944	0	0	0	0	0	0	0	189	6.37	305	0	0
2	38	120	90	110	85	115	87.5	156	53	76	21.78	58	148.53	49	81.29	51.77	128.4	48.14	225	1.19	0.62	3.47	2	0.3	82.2	3	10.62	5.1	2	18.05	0	3.84196	0.543341	2.2538	1.33911	87.132	4.5121	0	0	0	0	0	0	0	156	7.16	186	0	0
1	35	110	80	100	70	105	75	171	62	71	21.2	58	136.47	71	81.47	44.57	72.5	135.49	306	1.14	0.55	2.11	1	0.34	90.8	1	18.81	6.5	4	23.17	0	3.53001	1.52923	1.6762	1.15287	64.802	4.52209	0	0	0	0	0	1	0	168	6.89	233	0	0
2	61	140	90	130	80	135	85	152	55	96	23.81	63	271.77	50	87.13	42.94	83.4	390.42	278	1.4	1.13	1.89	1	0.36	339.6	4	16.34	5.3	2	81.7	1	7.02975	4.40655	3.89928	1.11071	150.746	4.83626	0	1	0	0	0	0	0	157	7.82	370	1	0
1	43	150	100	140	90	145	95	157	54	75	21.91	60	122.19	73	90.98	36.42	235.2	65	271	1.01	0.58	11.88	4	0.31	38.8	1	16.81	7.4	4	25.25	0	3.16063	0.733634	1.88231	0.942059	72.77	5.04996	0	1	0	1	0	1	0	183	5.51	237	0	0
1	46	130	80	120	70	125	75	165	72	90	26.45	52	204.4	85	95.11	27.48	743.3	205.61	426	0.85	1.02	3.51	2	0.58	163.6	2	19.4	6.5	4	66.34	1	5.28712	2.32065	3.51262	0.710812	135.798	5.2792	0	1	0	0	0	1	0	199	9.03	258	0	0
1	52	140	105	130	95	135	100	168	55	80	19.49	60	198.92	64	80.63	38.81	1024.4	145.31	253	1.03	0.91	4.49	3	0.78	9.3	1	18.7	7.6	4	48.06	0	5.14537	1.64007	3.38976	1.00388	131.048	4.47547	0	1	0	1	0	1	0	166	7.04	300	0	0
2	47	150	100	140	90	145	95	162	63	78	24.01	73	178.68	64	94.77	49.12	207.1	77.32	315	1.18	0.78	8.4	4	0.54	8.8	1	17.32	15.7	4	33.87	0	4.62183	0.872686	2.95127	1.27056	114.096	5.26032	0	0	0	1	0	0	0	143	8.87	395	0	0
1	65	110	80	100	70	105	75	169	51	67	17.86	60	169.74	67	91.22	55.57	428.8	43.32	355	1.35	0.72	1.87	1	0.81	330.9	4	25.14	5	2	28.13	0	4.39058	0.488939	2.72907	1.4374	105.506	5.06328	0	0	0	0	0	0	0	179	8.56	360	0	0
2	58	160	110	150	100	155	105	152	59	75	25.54	80	183.67	67	88.69	43.35	171.7	57.4	329	1.07	0.9	3.33	2	0.36	21.6	2	25.6	8.4	4	39.83	0	4.75091	0.647856	3.33264	1.12131	128.84	4.92285	0	0	0	1	0	0	0	149	6.09	207	0	0
2	68	140	90	130	80	135	85	153	48	75	20.5	82	164.41	53	87.65	67.53	120.1	67.5	199	1.56	0.61	4.73	3	0.32	127.4	4	19.4	5.6	3	19.27	0	4.25272	0.761851	2.15675	1.74677	83.38	4.86512	1	0	0	1	0	0	0	154	7.76	367	0	0
1	58	130	90	120	80	125	85	160	48	75	18.75	45	153.45	75	95.29	48.57	60	55.74	353	1.24	0.69	5.01	3	0.39	552.3	4	23.34	5.1	2	24.73	0	3.96922	0.62912	2.42452	1.25634	93.732	5.28919	0	0	0	0	0	1	0	172	6.7	212	0	0
2	48	120	80	110	70	115	75	155	47	80	19.56	60	124.69	66	89.18	45.09	42.7	77.23	237	1.1	0.51	5	3	0.31	13.3	2	13	5.5	3	18.17	0	3.2253	0.87167	1.65944	1.16632	64.154	4.95004	1	0	0	1	0	0	0	143	7.58	346	0	0
1	44	130	90	120	80	125	85	170	59	83	20.42	58	171.13	101	137.37	54.25	17.4	166.15	455	1.53	0.65	3.93	2	0.37	421.5	4	24.1	4.9	2	37.65	0	4.42654	1.87528	2.16374	1.40326	83.65	7.62489	0	0	0	0	1	1	0	171	5.82	212	0	0
2	45	140	90	130	80	135	85	142	62	93	30.75	58	151.38	81	97.58	56.52	43	81.77	267	1.32	0.61	2.08	1	0.63	87.8	3	14.52	7.4	4	21.03	0	3.91568	0.922912	2.03068	1.46198	78.506	5.4163	0	0	0	0	0	0	0	149	7.46	223	0	0
2	76	140	90	130	80	135	85	151	43	73	18.86	60	119.14	63	84.56	48.9	30.9	106.5	164	1.2	0.43	5.54	4	1.4	215.6	4	16.78	4.5	1	14.9	0	3.08174	1.20203	1.26591	1.26487	48.94	4.69361	1	0	0	1	0	0	0	159	5.19	250	0	0
1	47	120	80	110	70	115	75	169	62	80	21.71	84	189.64	58	90.6	83.91	34.7	228.59	420	2.32	0.6	3.61	2	0.36	278.3	3	32.72	4.5	1	34.93	0	4.90533	2.58002	1.5523	2.17046	60.012	5.02886	0	1	0	0	0	1	1	167	4.54	274	0	0
1	47	140	90	130	80	135	85	173	59	77	19.71	80	113.46	82	114.18	35.95	34.1	141.05	208	0.98	0.48	5.04	3	0.38	103	1	17.5	4.5	1	20.74	0	2.93482	1.59199	1.27522	0.929902	49.3	6.3377	0	1	0	0	0	1	0	175	7.59	269	0	0
2	57	140	90	130	80	135	85	150	49	75	21.78	60	246.96	4	90.53	53.63	19	88.81	260	1.3	1.17	3.75	2	0.26	180.1	4	14.59	5.7	3	68.69	1	6.388	1.00237	4.54133	1.38722	175.568	5.02498	0	1	0	0	0	0	0	148	5.85	201	1	1
1	39	110	80	100	65	105	72.5	170	58	67	20.07	54	163.23	71	87.82	34.3	58.1	59.35	280	0.87	0.86	5.2	3	0.2	132.7	1	15.59	5.3	3	41.81	0	4.22219	0.669865	3.02794	0.887222	117.06	4.87456	0	1	0	0	0	1	0	187	6.03	173	0	0
1	53	130	90	120	80	125	85	163	74	98	27.85	60	180.97	67	95.91	27.13	153	165.97	372	0.91	0.94	10.74	4	0.57	343.6	4	17.14	5.4	3	56.67	1	4.68107	1.87325	3.12069	0.701759	120.646	5.3236	0	1	0	0	0	1	0	200	6.42	187	0	0
1	57	130	90	120	80	125	85	164	78	95	29	60	180.28	70	85.46	42.68	87.6	180.14	274	1.22	0.75	4.26	2	0.37	573.9	4	16.09	5.1	2	47.34	0	4.66322	2.03318	2.62732	1.10398	101.572	4.74356	0	0	0	0	0	1	0	149	7.62	373	0	0
1	51	130	90	120	80	125	85	171	64	74	21.89	60	155.26	78	94.04	54.04	260.9	73.34	293	1.13	0.66	59.76	4	0.41	135.3	2	23.34	170.4	4	23.69	0	4.01604	0.827765	2.2388	1.39783	86.552	5.2198	0	0	0	0	0	1	0	136	6.62	139	0	0
1	37	140	90	130	80	135	85	163	59	76	22.21	60	112.97	77	83.69	37.23	57.1	70.28	317	0.96	0.54	4.17	2	0.27	113.3	1	15.19	6	3	22.49	0	2.92214	0.793228	1.59555	0.963011	61.684	4.64532	0	1	0	0	0	1	0	147	8.09	312	0	0
1	59	148	94	151	100	149.5	97	169	95.5	118	33.44	72	208.28	64	90.3	56.42	49.8	79.11	463	1.32	0.86	0.05	1	0.34	155	2	17.53	6.4	4	38.74	0	5.38748	0.892889	3.51883	1.45939	136.038	5.01221	0	0	0	1	0	0	0	158	7.02	267	0	0
2	26	110	63	110	63	110	63	162	67	81	25.53	64	124.28	58	83.81	40.29	63.2	51.33	241	0.98	0.57	4.1	2	0.28	42.8	3	12.78	4.7	1	17.59	0	3.21469	0.579345	1.90698	1.04216	73.724	4.65198	0	0	0	0	0	0	0	142	6.38	208	0	0
1	53	117	78	135	77	126	77.5	172	65.5	88	22.14	71	143.2	84	86.62	40.99	70.9	92.36	314	1.22	0.66	5.31	3	0.29	105.1	1	20.72	4.5	1	23.68	0	3.70409	1.04244	2.16601	1.06027	83.738	4.80795	0	0	0	0	0	0	1	112	6.49	290	0	0
2	30	134	78	121	81	127.5	79.5	159	49	72	19.38	80	203.5	61	75.41	59.49	189.9	93.01	271	1.5	0.83	4.96	3	0.47	40.3	2	15.41	7.7	4	37.51	0	5.26384	1.04977	3.24387	1.5388	125.408	4.18572	0	0	0	0	0	0	0	160	4.45	200	0	0
2	28	107	46	107	46	107	46	160	54	75	21.09	73	142.51	49	81.48	61.78	64.2	37.42	196	1.26	0.54	0.06	1	0.37	15.7	2	11.81	5.1	2	14.78	0	3.68624	0.422348	1.89462	1.59803	73.246	4.52265	0	0	0	0	0	0	0	129	5.52	242	0	0
2	27	110	63	120	63	115	63	155	65	78	27.06	70	142.23	63	77.98	50.77	65.5	52.43	215	1.15	0.57	0.22	1	0.49	68.6	3	12.49	64.2	4	14.71	0	3.679	0.591761	2.09452	1.31324	80.974	4.32837	0	0	0	0	0	0	0	120	6.28	217	0	0
1	28	110	64	108	55	109	59.5	180	65.5	74	20.22	59	133.08	80	82.18	40.41	72.8	57.53	273	1.01	0.6	0.29	1	0.32	258.7	3	12.46	5.7	3	20.38	0	3.44232	0.649323	2.09943	1.04527	81.164	4.5615	0	0	0	0	0	0	0	120	7	262	0	0
2	28	133	69	123	74	128	71.5	151	46	69	20.17	69	150.62	52	78.91	47.84	24.1	57.99	262	1.19	0.65	4.99	3	0.19	12.8	2	14.59	4.5	1	22.13	0	3.89602	0.654515	2.35856	1.23745	91.182	4.38	0	0	0	0	0	0	0	158	6.67	120	0	0
1	36	177	157	146	75	161.5	116	174	73	75	24.11	83	199.26	76	70.97	37.88	431.8	125.28	397	1.06	0.96	8.56	4	0.3	203	3	27.92	7.2	4	60.15	1	5.15416	1.414	3.52623	0.979824	136.324	3.93928	0	1	0	1	0	0	0	6.61	7.11	212	0	0
1	61	169	94	161	92	165	93	171	72.5	85	24.79	94	230.73	76	126.73	52.6	22.5	224.31	461	1.58	0.87	2.26	1	0.47	344.9	4	38.88	6.4	4	69	1	5.96818	2.53172	3.44718	1.36058	133.268	7.0343	0	1	0	1	1	0	0	181	14.84	263	0	0
1	36	122	61	108	60	115	60.5	170	75	86	25.95	58	203.7	82	86.59	29.64	65.2	405.13	370	1.12	0.77	1.44	1	0.28	538.2	4	20.05	6.1	3	52.47	0	5.26901	4.57257	2.40647	0.766684	93.034	4.80628	0	1	0	0	0	0	0	205	10.96	271	0	0
1	42	127	83	125	79	126	81	175	61	70	19.92	78	169.56	77	82.54	29.59	263.8	101.98	312	0.89	0.89	17.78	4	0.41	392.2	4	15.12	16.7	4	47.41	0	4.38593	1.15102	3.09296	0.765391	119.574	4.58148	0	1	0	0	0	0	0	173	9.04	332	0	0
1	33	134	88	136	83	135	85.5	172	65	82	21.97	77	208.38	76	91.19	41.16	17.7	198.78	372	1.22	0.85	4.3	3	0.3	189	2	17.57	5	2	65	1	5.39007	2.24357	3.29705	1.06467	127.464	5.06161	0	0	0	0	0	0	0	168	8.02	285	0	0
1	34	85	57	92	56	88.5	56.5	168	53	65	18.78	73	180.93	61	82.78	42.88	8.8	111.14	328	1.05	0.82	4.52	3	0.22	156.1	2	24.29	5	2	34.17	0	4.68003	1.2544	2.99591	1.10916	115.822	4.5948	0	0	0	0	0	0	0	176	8.14	220	0	0
2	47	127	67	119	66	123	66.5	160	66	85	25.78	87	195.97	74	87.43	51.36	31.2	83.91	340	1.25	0.84	1.44	1	0.27	37.4	2	19.91	5.4	2	36	0	5.06906	0.947065	3.30647	1.3285	127.828	4.85291	0	0	0	0	0	0	0	142	6.06	302	0	0
1	44	138	77	151	80	144.5	78.5	170	88	98	30.45	67	160.06	68	94.31	35.71	117.9	76.32	353	0.93	0.77	4.84	3	0.45	205.9	3	17.96	4.8	2	33.97	0	4.1402	0.8614	2.82168	0.923694	109.086	5.23479	0	1	0	1	0	0	0	169	7.09	189	0	0
2	47	99	68	106	75	102.5	71.5	157	52	72	21.1	80	198.33	61	88.44	67.6	466.8	73.07	297	1.49	0.77	0.88	1	0.26	63.2	3	14.42	6.8	3	34.82	0	5.13011	0.824718	3.00352	1.74858	116.116	4.90897	0	0	0	0	0	0	0	147	5.99	243	0	0
2	27	118	65	117	55	117.5	60	169	52	68	18.21	87	93.32	67	81.81	52.05	48.5	48.15	205	1.12	0.35	5.66	4	0.33	6.4	1	13.2	4.5	1	9.16	0	2.41386	0.543454	0.818417	1.34635	31.64	4.54096	0	0	0	0	0	0	0	129	6.99	170	0	0
1	44	100	67	99	66	99.5	66.5	164	57	72	21.19	74	148.56	79	79.59	49.95	49.8	104.39	348	1.21	0.61	5.11	3	0.34	287.7	3	14.98	5	2	27.56	0	3.84273	1.17822	2.01066	1.29203	77.732	4.41774	0	0	0	0	0	0	0	170	6.62	265	0	0
1	31	134	61	113	58	123.5	59.5	168	53	68	18.78	78	167.76	98	81.98	54.16	262.5	76.03	397	1.25	0.7	5.43	4	0.22	227.2	3	18	4.5	1	34.45	0	4.33937	0.858126	2.54511	1.40093	98.394	4.5504	0	0	0	0	0	0	0	174	7.96	279	0	0
1	32	126	74	122	68	124	71	172	63	70	21.3	67	178.57	73	95.28	59.94	37.9	77.24	358	1.34	0.77	2.83	2	0.17	423	4	22.19	10	4	40.61	0	4.61899	0.871783	2.66896	1.55044	103.182	5.28863	0	0	0	0	0	0	0	171	8.72	258	0	0
2	41	139	82	137	74	138	78	170	71	81	24.57	71	208.79	74	79.31	47.19	35	114.11	280	1.12	0.93	1.04	1	0.31	30	2	17.82	5.3	2	44.28	0	5.40067	1.28792	3.58971	1.22064	138.778	4.4022	0	0	0	0	0	0	0	169	7.92	197	0	0
1	34	139	74	137	84	138	79	188	73	72	20.65	69	171.43	82	84.31	91.26	29.9	101.42	356	1.89	0.52	4.24	2	0.41	98.4	1	19.47	4.6	1	21.44	0	4.4343	1.1447	1.54904	2.36058	59.886	4.67973	0	0	0	0	0	0	0	121	4.11	209	0	0
1	20	96	72	92	62	94	67	175	51	59	16.65	62	133.04	71	83.37	45.15	9.7	56.4	337	1.12	0.57	5.75	4	0.2	113.3	1	15.73	4.4	1	23.49	0	3.44128	0.636569	1.98163	1.16787	76.61	4.62755	0	0	0	0	0	0	0	176	5.23	240	0	0
2	26	83	56	87	69	85	62.5	159	49	66	19.38	101	124.44	56	91.78	45.23	47.9	66.59	328	1.11	0.53	5.82	4	0.34	42.3	3	11.07	4.6	1	21.69	0	3.21883	0.75158	1.7044	1.16994	65.892	5.09436	0	0	0	0	0	0	0	145	4.83	342	0	0
1	33	109	63	120	61	114.5	62	163	53	73	19.95	68	149.6	86	87.61	54.83	58.4	69.65	378	1.29	0.62	5.75	4	0.2	283.3	3	19.71	4.7	1	27.73	0	3.86963	0.786117	2.09105	1.41826	80.84	4.8629	0	0	0	0	0	0	0	173	5.31	182	0	0
1	31	116	67	114	65	115	66	176	65	80	20.98	69	187.17	84	84.38	56.32	175.4	57.6	451	1.23	0.78	5.63	4	0.26	200.2	3	16.78	4.3	1	31.23	0	4.84144	0.650113	3.08665	1.4568	119.33	4.68361	0	0	0	0	0	0	0	179	5.21	281	0	0
2	26	108	67	122	78	115	72.5	161	47	73	18.13	78	185.85	68	81.43	62.77	77.3	42.41	272	1.24	0.73	4.71	3	0.22	14.2	2	15.73	6.2	3	28.87	0	4.80729	0.478668	2.96425	1.62364	114.598	4.51987	0	0	0	0	0	0	0	150	7.14	341	0	0
1	33	110	72	91	70	100.5	71	165	49	84	18	78	145.1	74	80.87	56.75	20	56.22	327	1.24	0.57	0.42	1	0.22	344.9	4	18.63	5.6	3	22.97	0	3.75323	0.634537	1.99446	1.46793	77.106	4.48879	0	0	0	0	0	0	0	166	6.64	148	0	0
1	54	166	84	174	93	170	88.5	165	64	97	23.51	75	210.04	79	90.35	41.52	112.8	139.49	357	1.13	0.95	5.27	3	0.4	67.1	1	19.88	4.8	2	51.83	0	5.43301	1.57438	3.6374	1.07398	140.622	5.01499	0	0	0	1	0	0	0	169	8.27	209	0	0
1	30	117	62	117	66	117	64	174	59.2	77	19.55	77	163.88	83	78.97	53.67	26.1	58.07	324	1.25	0.72	3.35	2	0.23	204.1	3	17.28	8	4	31.35	0	4.23901	0.655418	2.55034	1.38826	98.596	4.38333	0	0	0	0	0	0	0	173	7.15	177	0	0
1	55	105	66	107	67	106	66.5	0	0	0	20	91	244.08	85	255.74	35.27	17.4	753.46	439	1.33	0.63	0.64	1	0.84	1342.8	4	55.58	6.2	3	44.4	0	6.3135	8.50406	1.50331	0.912312	58.118	14.1952	0	1	0	0	1	0	0	160	4.66	142	1	0
1	35	118	77	127	76	122.5	76.5	188	78	85	22.07	70	209.56	74	86.64	39.27	222.3	96.05	375	1.15	1.03	5.43	4	0.27	556.7	4	21.03	4.5	1	58.51	1	5.42059	1.08409	3.90792	1.01578	151.08	4.80906	0	1	0	0	0	0	0	172	8.53	284	0	0
2	61	0	0	0	0	0	0	155	48	65	19.98	0	170.12	65	99.87	64.98	415	82.53	258	1.48	0.68	4.57	2	0.72	48.2	3	14.84	5.1	2	31.99	0	4.40041	0.93149	2.29265	1.68081	88.634	5.54341	0	0	0	0	0	0	0	158	8.66	191	0	0
1	50	173	95	160	104	166.5	99.5	172	64	106	21.63	81	182.99	82	94.6	34.7	30.5	278.86	445	1.1	0.81	7.54	4	0.33	133.7	1	22.22	11	4	58.05	1	4.73332	3.1474	2.39312	0.897569	92.518	5.25089	1	1	0	1	0	0	0	184	7.45	255	0	0
2	38	114	69	138	54	126	61.5	165	48	73	17.63	73	168.5	47	85.09	49.63	256.1	56.54	182	1.13	0.75	5.56	4	0.52	5.4	1	14.45	4.4	1	34.37	0	4.35851	0.638149	2.78226	1.28376	107.562	4.72302	0	0	0	0	0	0	0	102	9.02	332	0	0
1	37	122	76	113	74	117.5	75	174	73	78	20	73	170.03	67	77.55	40.33	37.9	79.89	372	1.08	0.77	0.8	1	0.2	313.9	4	24.23	5	2	39.81	0	4.39809	0.901693	2.94159	1.0432	113.722	4.30451	0	0	0	0	0	0	0	171	6.49	247	0	0
2	26	127	66	101	55	114	60.5	149	45	66	20.27	86	171.97	64	81.96	56.61	23.8	53.12	264	1.24	0.69	5.64	4	0.28	10.8	1	21.19	4.7	1	26.89	0	4.44827	0.599549	2.70916	1.4643	104.736	4.54929	0	0	0	0	0	0	0	160	8.55	191	0	0
1	37	120	71	131	68	125.5	69.5	175	72	82	23.51	72	186.46	72	85.78	43.99	71.9	96	242	1.13	0.83	3.14	2	0.22	372.4	4	16.2	6.5	4	47.81	0	4.82307	1.08352	3.18857	1.13787	123.27	4.76132	0	0	0	0	0	0	0	169	7.96	298	0	0
1	54	106	66	124	58	115	62	172	66	90	22.31	60	192.21	73	72.48	36.11	130.3	121.39	344	1.1	0.93	0.05	1	0.36	135.8	2	21.29	5.5	3	59.06	1	4.97181	1.37009	3.40978	0.93404	131.822	4.02309	0	1	0	0	0	0	0	172	4.71	255	0	0
1	30	120	76	125	68	122.5	72	168	70	87	24.8	78	141.54	66	81.75	54.6	50.1	108.88	345	1.16	0.54	2.94	2	0.36	87.8	1	18.88	5.3	3	19.72	0	3.66115	1.22889	1.68557	1.41231	65.164	4.53763	0	0	0	0	0	0	0	167	7.85	217	0	0
1	41	123	66	111	74	117	70	163	64	81	24.09	78	192.22	99	74.64	65.24	86	94.25	370	1.68	0.84	3.15	2	0.59	236.6	3	23.64	8	4	47.67	0	4.97206	1.06377	2.79695	1.68753	108.13	4.14298	0	0	0	0	0	0	0	179	8.73	268	0	0
1	37	121	77	117	77	119	77	168	71	88	25.16	74	158.8	81	76.75	45.13	545.8	40.43	335	1	0.72	2.79	2	0.24	172.4	2	22.62	5.1	2	32.5	0	4.1076	0.456321	2.73109	1.16736	105.584	4.2601	0	0	0	0	0	0	0	156	7.1	320	0	0
2	39	118	66	117	64	117.5	65	157	49	67	19.88	91	146.95	73	81.58	50.96	172.3	106.2	287	1.34	0.61	5.66	4	0.54	2.9	1	19.09	4.6	1	32.11	0	3.80109	1.19865	1.93352	1.31816	74.75	4.5282	0	0	0	0	0	0	0	108	6.8	300	0	0
1	62	128	73	128	74	128	73.5	162	51	76	19.43	87	178.97	62	83	40.7	7.8	82.02	305	0.96	0.87	0.55	1	1.25	328.9	4	21.49	5.3	3	32.09	0	4.62933	0.925734	3.15225	1.05277	121.866	4.60702	0	0	0	0	0	0	0	183	8.04	210	0	0
1	44	112	54	113	57	112.5	55.5	172	68	86	22.99	52	217.38	49	95.09	47.84	19.7	138.07	376	1.27	0.99	5.95	4	0.37	119.6	1	15.62	6.2	3	64.01	1	5.62287	1.55835	3.67113	1.23745	141.926	5.27809	0	0	0	0	0	0	0	175	7.06	271	0	0
1	56	120	59	89	57	104.5	58	177	81	85	25.85	66	183.19	76	114.56	29.63	73.5	166.12	311	0.96	0.83	4.16	2	0.18	572.1	4	17.71	5.6	3	53.54	0	4.73849	1.87494	3.11267	0.766425	120.336	6.35879	0	1	0	0	0	0	0	191	7.25	263	0	0
1	67	130	82	136	81	133	81.5	180	80	90	24.69	68	36.59	14	17.62	6.85	30.5	21.34	103	0.16	0.25	4.25	2	0.26	80.2	1	5.6	4.6	1	7.46	0	0.946456	0.240858	0.658872	0.177186	25.472	0.97802	1	1	0	1	0	0	0	183	5.93	207	0	0
2	54	119	73	110	69	114.5	71	153	50	77	21.36	75	195.25	49	93.59	47.49	239.7	64.51	292	1.17	0.88	3.17	2	0.33	237.1	4	12.08	5	2	45.77	0	5.05044	0.728104	3.48831	1.2284	134.858	5.19483	1	0	0	1	0	0	0	159	6.92	278	0	0
2	27	107	53	97	55	102	54	162	67.2	80	25.61	59	150.2	52	79.32	37.2	249.4	111.66	301	1.11	0.7	2.04	1	0.24	17.2	2	11.42	5.2	2	41.63	0	3.88515	1.26027	2.34527	0.962235	90.668	4.40275	0	1	0	0	0	0	0	152	7.04	281	0	0
1	41	100	64	105	57	102.5	60.5	160	59	70	23.05	77	200.31	88	85.81	39.81	129.3	118.88	381	1.17	0.82	0	1	0	0	1	0	0	1	57.33	1	5.18132	1.34176	3.53658	1.02975	136.724	4.76299	0	1	0	0	0	0	0	169	5.36	182	0	0
1	50	116	79	115	81	115.5	80	165	56	70	20.57	79	195.81	75	88.8	58.04	364.1	65.71	304	1.47	0.81	3.19	2	0.2	68.1	1	13.57	6	3	43.58	0	5.06492	0.741648	3.22369	1.50129	124.628	4.92895	0	0	0	0	0	0	0	175	6.35	186	0	0
1	38	108	57	101	64	104.5	60.5	165	51	70	18.73	76	252.85	97	86.44	72.07	11.3	153.53	139	1.57	0.9	5.68	4	0.16	106.1	1	19.47	5.2	2	54.94	1	6.54035	1.73284	3.88189	1.8642	150.074	4.79796	0	1	0	0	0	0	0	165	7.62	199	1	0
1	57	111	71	111	64	111	67.5	160	57	85	22.27	53	180.49	74	78.49	59.65	125.5	41.25	357	1.39	0.8	5.2	3	0.17	150.2	2	16.67	4.5	1	31.49	0	4.66865	0.465576	2.91231	1.54294	112.59	4.35668	0	0	0	0	0	0	0	120	5.6	253	0	0
2	28	108	63	113	56	110.5	59.5	170	51	72	17.65	68	146.6	70	87.38	69.42	46.2	43.2	253	1.4	0.53	5.2	3	0.26	55.2	3	13.17	5.2	2	19.39	0	3.79203	0.487585	1.77289	1.79565	68.54	4.85013	0	0	0	0	0	0	0	134	5.01	267	0	0
1	32	138	113	117	52	127.5	82.5	170	64	76	22.15	69	147.08	83	76.13	43.48	555.7	46.91	357	1.13	0.67	0.85	1	0.16	383	4	15.19	5.9	3	31.52	0	3.80445	0.529458	2.43709	1.12468	94.218	4.22569	0	0	0	0	0	0	0	167	6.2	323	0	0
1	47	116	70	104	67	110	68.5	172	66	77	22.31	73	219.65	85	92.34	38.23	312.7	81.36	365	1.05	1.04	3.3	2	0.01	436.5	4	16.81	5.4	3	59.2	1	5.68158	0.918284	4.27181	0.988877	165.148	5.12544	0	1	0	0	0	0	0	182	5.71	192	0	1
2	32	108	68	98	61	103	64.5	160	50	64	19.53	79	181.95	57	90.26	62.91	255.9	66.82	227	1.5	0.72	5.23	3	0.55	9.3	1	13.27	6.9	3	34.23	0	4.70641	0.754176	2.73347	1.62726	105.676	5.00999	0	0	0	0	0	0	0	149	14.57	354	0	0
1	41	116	77	116	70	116	73.5	165	65	90	23.88	73	289.46	85	96.96	58.81	53.3	125.64	440	1.42	1.21	5.17	3	0.19	142.2	2	22.75	4.8	2	78.99	1	7.48733	1.41806	5.31614	1.52121	205.522	5.38188	0	1	0	0	0	0	0	174	6.69	265	1	1
1	30	144	85	136	68	140	76.5	158	63	69	25.24	113	180.56	76	107.97	64.81	87.3	77.29	281	1.64	0.77	5.28	3	0.25	144.8	2	28.19	4.8	2	43.07	0	4.67046	0.872348	2.59421	1.67641	100.292	5.99301	0	0	0	1	0	0	0	176	7.28	90	0	0
1	41	147	68	141	65	144	66.5	165	53	73	19.47	75	175.22	70	92.56	49.36	57.8	43.45	335	1.18	0.75	4.41	3	0.12	355.1	4	14.45	6.3	4	36.03	0	4.53233	0.490406	3.03078	1.27677	117.17	5.13766	0	0	0	1	0	0	0	168	6.58	178	0	0
2	58	141	77	131	76	136	76.5	158	70	90	28.04	84	193.8	69	91.76	53.51	92.7	83.1	285	1.36	0.78	0.68	1	0.4	168	4	16.49	9.3	4	32.19	0	5.01293	0.937923	3.19891	1.38412	123.67	5.09325	0	0	0	0	0	0	0	165	6.89	188	0	0
1	40	148	79	137	74	142.5	76.5	166	71.3	89	25.87	64	183.05	68	99.78	34.78	74.1	114.68	366	1.03	0.87	3.63	2	0.33	627.8	4	15.44	4.7	1	51.43	0	4.73487	1.29436	3.24196	0.899638	125.334	5.53841	0	1	0	1	0	0	0	177	5.31	230	0	0
1	18	98	49	93	46	95.5	47.5	182	61	73	18.42	47	131.42	88	80.86	32.67	65.2	83	398	0.97	0.61	1.34	1	0.15	92.3	1	16.38	5.3	3	27.14	0	3.39938	0.936795	2.12494	0.845059	82.15	4.48823	0	1	0	0	0	0	0	185	6.26	235	0	0
1	51	189	107	183	107	186	107	173	85	103	28.4	72	183.05	65	108.05	30.96	42.1	193.98	272	1.03	0.87	3.5	2	0.3	258.7	3	15.48	6.1	3	53.98	0	4.73487	2.18939	2.93052	0.800828	113.294	5.99745	0	1	0	1	0	0	0	192	6.99	267	0	0
1	34	105	34	107	49	106	41.5	0	0	0	20	58	132.04	71	87.35	40.01	253.7	47.8	347	1	0.55	3.46	2	0.2	192.9	2	11.36	4.5	1	21.99	0	3.41542	0.539503	2.13321	1.03492	82.47	4.84847	0	0	0	0	0	0	0	157	7.18	201	0	0
1	38	124	56	123	58	123.5	57	155	51	75	21.23	55	177.1	90	75.83	49.69	208.6	68.55	278	1.2	0.79	5.27	3	0.26	279.6	3	12.49	5.1	2	33.03	0	4.58096	0.773702	2.94102	1.28531	113.7	4.20904	0	0	0	0	0	0	0	174	5.92	228	0	0
1	28	110	49	120	45	115	47	179	65	75	20.29	55	140.92	66	85.62	33.23	30.2	93.01	330	0.95	0.67	4.29	3	0.29	142.7	2	18	4.8	2	28.82	0	3.64511	1.04977	2.3044	0.859545	89.088	4.75244	0	1	0	0	0	0	0	169	6.81	272	0	0
2	24	115	53	91	56	103	54.5	167	50	64	17.93	78	165.94	60	81.38	59.33	53.3	54.94	265	1.18	0.67	2.22	1	0.21	65.1	3	14.59	15.4	4	26.11	0	4.29229	0.62009	2.47341	1.53466	95.622	4.5171	0	0	0	0	0	0	0	142	5.32	216	0	0
1	35	114	75	111	78	112.5	76.5	170	67	83	23.18	81	173.63	90	97.15	51.35	71.6	47.52	391	1.23	0.67	3.88	2	0.12	172.4	2	20.29	4.7	1	25.1	0	4.49121	0.536343	2.91712	1.32825	112.776	5.39243	0	0	0	0	0	0	0	171	5.05	292	0	0
1	22	98	62	99	62	98.5	62	170	75.6	79	26.16	78	167.53	92	99.44	26.85	49.5	155.9	380	0.92	0.73	2.22	1	0.31	179.5	2	27.46	5	2	44.67	0	4.33342	1.75959	2.83238	0.694516	109.5	5.51954	0	1	0	0	0	0	0	198	7.93	288	0	0
1	27	113	72	118	70	115.5	71	165	54.5	70	20.02	74	169.75	76	85.1	46.16	41.8	87.73	270	1.2	0.69	5.01	3	0.22	148.6	2	13.4	4.5	1	33.39	0	4.39084	0.990181	2.74299	1.194	106.044	4.72358	0	0	0	0	0	0	0	163	4.45	205	0	0
2	33	120	81	118	86	119	83.5	158	42.6	61	17.06	87	144.87	51	92.42	51.66	109	58.92	184	1.22	0.6	5.66	4	0.45	5.9	1	9.25	5.2	2	22.09	0	3.74728	0.665011	2.10621	1.33626	81.426	5.12988	0	0	0	0	0	0	0	119	5.61	291	0	0
1	51	146	88	145	77	145.5	82.5	180	67	92	20.68	67	145.56	67	80.54	50.46	399.8	45.08	331	1.14	0.65	11.23	4	0.45	162.6	2	25.73	43.2	4	25.78	0	3.76513	0.508804	2.22669	1.30523	86.084	4.47047	0	0	0	1	0	0	0	156	5.69	217	0	0
2	35	124	84	131	81	127.5	82.5	163	68	77	25.59	68	141.4	51	66.51	33.33	21.6	59.35	252	0.89	0.68	4.88	3	0.28	17.2	2	14.98	15	4	23.63	0	3.65753	0.669865	2.48836	0.862131	96.2	3.69172	0	1	0	0	0	0	0	141	5.54	205	0	0
1	25	116	63	109	65	112.5	64	160	56	75	21.87	62	192.34	72	77.2	39.79	73.2	182.46	326	1.15	0.83	1.48	1	0.2	172.4	2	14.7	5.3	3	46.94	0	4.97517	2.05937	3.00202	1.02923	116.058	4.28508	0	1	0	0	0	0	0	178	10.62	237	0	0
1	78	103	71	104	69	103.5	70	170	61	75	21.11	85	163.03	80	93.91	43.37	235.8	79.44	359	1.14	0.74	2.04	1	1.18	222.5	3	27.96	6.1	3	35.74	0	4.21702	0.896614	2.68422	1.12183	103.772	5.21259	0	0	0	0	0	0	0	188	8.45	188	0	0
2	54	158	99	155	98	156.5	98.5	153	51	75	21.79	85	195.74	52	80.4	50.42	381.2	84.82	291	1.17	0.84	2.42	1	0.54	199.6	4	12.78	12.3	4	35.6	0	5.06311	0.957336	3.32012	1.30419	128.356	4.4627	1	0	0	1	0	0	0	157	3.95	227	0	0
1	43	153	89	154	91	153.5	90	180	68	83	20.99	76	188.05	82	78.14	64.87	550.8	53.51	274	1.5	0.74	4.84	3	0.15	283.9	3	20.76	5	2	34.46	0	4.8642	0.60395	2.90942	1.67796	112.478	4.33726	0	0	0	1	0	0	0	183	6.41	214	0	0
1	57	185	94	178	92	181.5	93	168	61	95	21.61	72	176.54	51	66.41	40.64	224.1	115.94	297	1.04	0.82	31.43	4	0.4	333.6	4	17.82	97.3	4	40.27	0	4.56648	1.30858	2.91547	1.05122	112.712	3.68617	0	0	0	1	0	0	0	166	8.11	293	0	0
1	30	128	77	127	67	127.5	72	175	80	94	26.12	68	253.83	74	81.37	40.48	0	423.3	436	1.05	1.13	2.11	1	0.47	165.3	2	24.13	5.1	2	61.67	1	6.5657	4.77765	3.32876	1.04708	128.69	4.51654	0	1	0	0	0	0	0	176	7.55	241	1	0
1	58	118	59	116	59	117	59	176	71	93	22.92	70	134.13	82	89.19	39.24	0	377.27	315	1.09	0.63	4.41	3	0.55	385.8	4	35.26	4.8	2	27.67	0	3.46948	4.25813	0.502742	1.015	19.436	4.9506	0	1	0	0	0	0	0	179	5.42	256	0	0
2	31	105	76	95	65	100	70.5	160	47.5	69	18.55	52	149.43	78	104.82	50.69	18.7	74.78	351	1.17	0.62	5.4	3	0.32	32.4	2	19.23	4.4	1	21.94	0	3.86524	0.844018	2.1672	1.31117	83.784	5.81816	0	0	0	0	0	0	0	142	5.12	134	0	0
1	37	110	80	100	70	105	75	176	62	72	20.02	78	128.36	83	84.13	45.15	44	53.56	299	1.1	0.56	2.55	1	0.3	441.9	4	19.43	4.5	1	17.95	0	3.32023	0.604515	1.87527	1.16787	72.498	4.66974	0	0	0	0	0	1	1	168	6.84	211	0	0
1	32	120	80	110	75	115	77.5	173	60	75	20.05	80	145.27	74	91.28	64.32	33.1	65.51	332	1.49	0.52	5.13	3	0.25	156.1	2	13.7	6	3	17.92	0	3.75763	0.739391	1.75499	1.66374	67.848	5.06661	0	0	0	0	0	0	1	186	6.35	226	0	0
2	59	140	90	130	80	135	85	160	62	86	24.22	57	173.9	72	124.1	51.21	660.1	116.09	448	1.29	0.81	16.99	4	0.45	254.5	4	14.07	29.4	4	36.6	0	4.49819	1.31027	2.573	1.32462	99.472	6.88832	0	0	0	0	0	0	0	175	5.69	195	0	0
1	42	120	80	110	70	115	75	180	74	80	22.84	55	142.7	87	104.75	51.47	104.8	81.26	335	1.27	0.58	4.8	3	0.3	582.2	4	13.33	5.1	2	20.26	0	3.69115	0.917156	1.93942	1.33135	74.978	5.81428	0	0	0	0	0	0	0	171	4.54	227	0	0
1	47	120	80	110	70	115	75	166	65	87	23.59	60	153.24	83	78.75	45.9	532.5	74.59	305	1.13	0.7	0.73	1	0.22	325	4	21.93	12.7	4	28.67	0	3.96379	0.841874	2.39064	1.18727	92.422	4.37111	0	0	0	0	0	0	0	184	5.18	180	0	0
1	41	140	90	130	80	135	85	182	78	95	23.55	61	171.47	81	91.39	45.17	71.6	120.45	403	1.26	0.77	3.57	2	0.3	183.4	2	20.08	9.5	4	39.78	0	4.43533	1.35948	2.64382	1.16839	102.21	5.07271	0	0	0	0	0	1	1	181	10.31	406	0	0
2	39	120	80	110	70	115	75	150	44	71	19.56	58	181.59	60	87.85	88.25	347.5	39.21	215	1.73	0.59	37.69	4	0.53	49.2	3	12.08	307	4	18.64	0	4.6971	0.442551	2.21154	2.28272	85.498	4.87622	0	0	0	0	0	0	0	142	7.08	236	0	0
2	28	130	90	120	80	125	85	157	43	73	17.44	58	173.9	56	93.19	61.92	662.1	38	201	1.33	0.68	5.19	3	0.12	15.2	2	16.52	4.9	2	25.5	0	4.49819	0.428894	2.69995	1.60166	104.38	5.17262	0	0	0	0	0	0	0	133	5.37	290	0	0
1	66	130	80	120	70	125	75	182	70	89	21.13	58	202.39	89	86.18	59.15	91.1	190.94	495	1.46	0.76	4.64	3	0.16	223.7	3	22.35	4.8	2	34.85	0	5.23513	2.15508	2.71733	1.53001	105.052	4.78353	0	0	0	0	0	1	0	143	6.25	225	0	0
2	26	110	80	100	70	105	75	144	67	96	32.31	58	154	57	81.77	57.23	135	54.22	336	1.29	0.63	9.2	4	1.02	61.7	3	13.7	6.2	3	19.99	0	3.98345	0.611964	2.22261	1.48034	85.926	4.53874	0	0	0	0	0	0	0	141	4.11	198	0	0
2	23	110	70	100	60	105	65	142	44	70	21.82	58	163.29	68	80.52	72.24	48.5	75.98	196	1.75	0.56	5.23	3	0.22	9.3	1	19.33	5.2	2	21.25	0	4.22375	0.857562	1.96208	1.8686	75.854	4.46936	0	0	0	0	0	0	0	182	8.45	224	0	0
2	19	120	80	110	70	115	75	153	45	67	19.22	58	154.63	67	74.24	72.97	21.9	56.07	281	1.6	0.51	5.29	3	0.07	11.8	1	16.96	5.6	3	15.27	0	3.99974	0.632844	1.82219	1.88748	70.446	4.12078	0	0	0	0	0	0	0	163	8.68	197	0	0
2	35	100	80	90	70	95	75	154	52	70	21.93	58	192.89	53	89.65	44.8	11.3	67.19	274	1.23	0.84	4.85	3	0.14	153.9	4	11.19	5.3	2	37.43	0	4.98939	0.758352	3.48298	1.15882	134.652	4.97613	0	0	0	0	0	0	0	192	6.02	168	0	0
2	18	100	70	90	60	95	65	160	45	67	17.58	58	137.85	66	82.74	25.84	167.4	76.08	249	0.76	0.67	5.88	4	0.25	31	2	17.53	4.2	1	31.92	0	3.5657	0.858691	2.50372	0.668391	96.794	4.59258	0	1	0	0	0	0	0	151	7.11	267	0	0
1	59	130	90	120	80	125	85	160	54	85	21.09	74	161.49	72	75.76	45.8	45.6	101.09	252	1.15	0.7	1.71	1	0.38	942.8	4	19.09	5.7	3	27.61	0	4.17719	1.14097	2.46953	1.18469	95.472	4.20515	0	0	0	0	0	1	0	184	9.63	136	0	0
1	49	130	90	120	80	125	85	165	80	106	29.38	72	223.94	72	113.16	32.64	76.4	466.43	1083	1.04	0.92	1.9	1	0.35	169.6	2	21.49	5.6	3	65.72	1	5.79255	5.26445	2.53528	0.844283	98.014	6.28108	0	1	0	0	0	1	0	181	6.32	189	0	0
1	40	120	80	110	70	115	75	164	58	73	21.56	68	172.51	89	82.64	43.41	85.7	61.82	306	1.07	0.81	5.51	4	0.18	113.9	1	20.93	4.2	1	33.57	0	4.46223	0.697743	3.01956	1.12287	116.736	4.58703	0	0	0	0	0	1	0	181	7.37	183	0	0
1	55	130	80	120	70	125	75	163	57	86	21.45	58	233.3	98	87.92	52.2	194.8	49.87	377	1.31	1.06	3.41	2	0.23	185.6	2	18.49	4.9	2	57.74	1	6.03466	0.562867	4.42644	1.35023	171.126	4.88011	0	1	0	0	0	1	0	170	6.38	311	0	1
1	38	110	70	90	60	100	65	180	68	85	20.99	58	188.59	66	79.62	49.01	159.3	56.9	216	1.2	0.84	4.8	3	0.32	83.7	1	13.87	5.3	3	35.17	0	4.87817	0.642212	3.31609	1.26772	128.2	4.4194	0	0	1	0	1	0	0	180	6.72	232	0	0
1	57	110	80	100	70	105	75	166	62	87	22.5	49	207.59	69	96.29	30.98	207.7	134	378	0.99	1.06	4.95	3	0.4	154.5	2	15.62	4.5	1	64.74	1	5.36963	1.51242	3.87506	0.801345	149.81	5.34469	0	1	0	0	0	1	0	174	10.76	228	0	0
2	40	140	90	130	80	135	85	158	49	70	19.63	60	158.65	82	87.12	62.49	4.9	65.54	322	1.38	0.6	5.31	3	0.21	136.3	4	11.78	5.2	2	20.06	0	4.10372	0.739729	2.14827	1.6164	83.052	4.8357	0	0	0	0	0	0	0	166	6.69	240	0	0
2	65	140	80	130	70	135	75	143	47	84	22.98	58	132.87	57	90.9	40.32	256.4	59.06	334	0.98	0.62	3.57	2	4.59	221.9	4	13.8	4.9	2	17.42	0	3.43689	0.666591	2.08841	1.04294	80.738	5.04552	0	0	0	0	0	0	0	170	5.24	243	0	0
1	61	130	90	120	80	125	85	154	53	78	22.35	69	140.84	71	85.66	57.49	165.2	99.08	331	1.22	0.52	0.05	1	0.41	168	2	23.44	5.1	2	19.34	0	3.64304	1.11828	1.6434	1.48707	63.534	4.75466	0	0	0	0	0	0	0	170	5.74	146	0	0
1	64	140	95	130	85	135	90	160	76	106	29.69	58	199.34	91	136.6	43.92	52	118.35	512	1.21	0.94	2.27	1	0.54	121.7	1	24.75	13.5	4	49.94	0	5.15623	1.33578	3.40792	1.13606	131.75	7.58215	1	0	0	1	1	0	0	205	9.09	240	0	0
2	59	140	90	130	80	135	85	154	41	72	17.29	58	183.26	58	88.82	47.87	341.6	86.67	215	1.34	0.81	0.05	1	0.43	59.7	3	14.63	8.9	4	26.89	0	4.7403	0.978217	3.0537	1.23823	118.056	4.93006	0	0	0	0	0	0	0	170	5.89	204	0	0
1	50	100	70	90	60	95	65	167	56	73	20.08	60	115.12	93	79.9	57.44	56.8	35.63	264	1.14	0.43	9.11	4	2.42	18.2	1	21.73	28.1	4	9.98	0	2.97775	0.402144	1.30766	1.48577	50.554	4.43495	0	0	0	0	0	0	0	150	5.41	211	0	0
1	36	120	90	110	85	115	87.5	168	54	68	19.13	68	154.36	89	86.39	46.52	390.1	99.36	365	1.31	0.63	3.81	2	7.94	240.1	3	18.63	5.2	2	29.58	0	3.99276	1.12144	2.27543	1.20331	87.968	4.79518	0	0	0	0	0	0	0	174	7.11	349	0	0
1	68	120	80	110	60	115	70	167	47	75	16.85	68	172.24	80	81.46	34.55	422.2	99.36	391	0.91	0.89	49.68	4	1.49	90.8	1	17.39	149.6	4	35.35	0	4.45525	1.12144	3.04754	0.893689	117.818	4.52154	0	1	0	0	0	1	0	189	7.81	151	0	0
1	23	120	78	110	65	115	71.5	169	51.5	70	18.03	55	113.25	72	88.09	33.99	21.9	76.85	362	0.93	0.55	5.28	3	0.1	201.9	3	22.16	4.4	1	21.09	0	2.92938	0.867381	1.65261	0.879203	63.89	4.88954	0	1	0	0	0	1	0	184	8.2	303	0	0
1	38	120	76	110	67	115	71.5	172	52	70	17.58	54	158.93	75	94.24	63.35	21.3	67.67	278	1.4	0.62	5.64	4	0.5	17.7	1	18.35	4.6	1	23.36	0	4.11097	0.76377	2.12225	1.63864	82.046	5.23091	0	0	0	0	0	0	0	157	6.9	275	0	0
2	35	115	80	105	75	110	77.5	153	48.5	70	20.72	60	162.88	57	82.12	67.61	62.3	81.57	250	1.51	0.64	5.7	4	0.23	19.6	2	13.87	5	2	21.03	0	4.21314	0.920655	2.04232	1.74884	78.956	4.55817	0	0	0	0	0	0	0	140	3.89	332	0	0
2	28	118	76	107	67	112.5	71.5	156	55	70	22.6	61	181.67	68	93.23	47.34	76	91.11	313	1.23	0.79	5.15	3	0.38	7.4	1	9.58	4.9	2	38.96	0	4.69917	1.02833	3.00331	1.22452	116.108	5.17484	0	0	0	0	0	0	0	148	7.65	218	0	0
1	35	118	76	108	63	113	69.5	178	61	77	19.25	60	150.13	79	101.98	49.04	335.8	98.25	337	1.34	0.65	2.58	2	0.2	132.1	1	20.32	5.4	3	34.84	0	3.88334	1.10892	2.10657	1.26849	81.44	5.66052	0	0	0	0	0	1	1	171	6.69	206	0	0
1	32	123	73	120	75	121.5	74	164	63	90	23.42	78	191.4	89	100.04	33.87	67.1	164.33	398	1.05	0.92	1.99	1	0.22	328.9	4	13.23	4.9	2	52.18	0	4.95085	1.85474	3.22462	0.876099	124.664	5.55284	0	1	0	0	0	0	0	181	8.01	266	0	0
1	26	126	71	125	70	125.5	70.5	178	72	76	22.72	78	143.85	83	88.34	35.54	83.1	72.62	349	1.02	0.67	5.78	4	0.24	28	1	14.84	4.4	1	31.38	0	3.7209	0.819639	2.42592	0.919296	93.786	4.90342	0	1	0	0	0	1	0	179	6.15	239	0	0
1	39	116	70	115	65	115.5	67.5	169	63	82	22.06	88	171.98	81	81.71	44	180.7	106.25	413	1.2	0.8	4.67	3	0.74	168.5	2	16.31	4.8	2	40.79	0	4.44853	1.19921	2.76073	1.13813	106.73	4.53541	0	0	0	0	0	1	1	165	6.17	273	0	0
1	19	105	51	105	50	105	50.5	181	56	74	17.09	78	177.26	86	82.54	51.85	622.7	61.23	346	1.17	0.74	4.68	3	0.31	28	1	15.09	4.4	1	27.23	0	4.5851	0.691084	2.92716	1.34118	113.164	4.58148	0	0	0	0	0	0	0	179	5.41	229	0	0
1	31	117	79	115	80	116	79.5	164	47	65	17.47	90	178.44	62	88.16	75.09	97.2	102.73	22	1.67	0.62	5.6	4	0.34	142.7	2	19.64	5	2	27.59	0	4.61562	1.15948	2.14185	1.94232	82.804	4.89343	0	0	0	0	0	0	0	182	8.32	307	0	0
2	30	113	62	110	60	111.5	61	157	44	67	17.85	55	149.53	62	96.43	52.07	327.1	100.51	232	1.31	0.63	5.59	4	0.21	7.9	1	17.14	5.1	2	30.26	0	3.86782	1.13442	2.00098	1.34687	77.358	5.35246	0	0	0	0	0	0	0	163	6.54	186	0	0
1	26	122	76	120	70	121	73	186	66	75	19.08	89	181.14	80	80.98	35.15	17.4	429.63	358	1.26	0.54	3.97	2	0.51	249.6	3	35.22	5.2	2	40.38	0	4.68546	4.8491	1.55365	0.909208	60.064	4.49489	0	1	0	0	0	1	1	141	6.96	226	0	0
1	35	120	81	119	80	119.5	80.5	171	62	87	21.2	86	170.02	82	78.13	31.58	698.8	62.03	375	0.89	0.86	3.29	2	0.26	218.5	3	16.42	5.2	2	27.34	0	4.39783	0.700113	3.26006	0.816865	126.034	4.3367	0	1	0	0	0	0	0	182	6.75	180	0	0
1	42	110	80	100	70	105	75	164	55	74	20.45	56	175.01	68	103.69	47.45	287	67.03	293	1.21	0.78	5.72	4	0.21	195.7	2	19.26	4.6	1	33.59	0	4.5269	0.756546	2.95277	1.22737	114.154	5.75544	1	0	0	1	0	1	0	164	5.14	229	0	0
1	64	140	100	130	90	135	95	168	69	89	24.45	60	224.5	67	100.29	54.65	274.4	289.81	333	1.52	0.96	3.14	2	0.38	666.9	4	22.29	7.7	4	64.58	1	5.80704	3.27099	2.89415	1.41361	111.888	5.56672	0	1	0	1	0	1	0	178	5.51	215	0	0
1	68	150	110	140	105	145	107.5	162	64	95	24.39	60	210.84	161	92.96	29.34	37	157.54	443	0.94	1.02	24.61	4	0.47	334.2	4	77.77	11.7	4	58.79	1	5.4537	1.7781	3.87977	0.758924	149.992	5.15986	0	1	0	1	0	1	0	180	9.82	282	0	0
1	21	110	80	100	60	105	70	174	64	71	21.14	49	130.02	69	79.38	44.37	89.8	101.31	300	1.1	0.54	1.18	1	0.29	222.5	3	18.74	4.4	1	20.99	0	3.36317	1.14345	1.69136	1.1477	65.388	4.40608	0	0	0	0	0	0	0	163	7.3	237	0	0
2	27	100	70	90	60	95	65	156	39	70	16.03	68	123.79	74	85.32	42.68	54.6	143.73	236	1.19	0.54	5.55	4	0.35	2	1	8.23	4.4	1	22.78	0	3.20202	1.62223	1.35447	1.10398	52.364	4.73579	0	0	0	0	0	0	0	173	7.1	307	0	0
2	36	120	80	110	70	115	75	162	49	61	18.67	69	129.47	58	106.67	51.34	371.2	42.4	222	1.13	0.55	5.7	4	0.38	11.8	1	11.27	5.5	3	18.48	0	3.34894	0.478555	1.8016	1.32799	69.65	5.92085	0	0	0	0	0	0	0	183	8.96	208	0	0
1	56	170	110	160	100	165	105	167	58	78	20.8	60	228.38	67	92.02	54.74	251.3	122.06	280	1.34	0.98	3.19	2	0.32	122.2	1	71	5.1	2	60.02	1	5.9074	1.37765	3.86001	1.41593	149.228	5.10768	1	0	0	1	0	0	0	152	6.69	435	0	0
1	31	120	80	110	70	115	75	165	51	73	18.73	58	185.55	67	85.32	59.68	188.4	109.55	354	1.52	0.75	4.62	3	0.36	240.1	3	21.26	5.2	2	42.06	0	4.79953	1.23646	2.68908	1.54371	103.96	4.73579	0	0	0	0	0	1	1	174	9.52	297	0	0
1	33	100	70	90	60	95	65	166	53	80	19.23	60	226.16	69	91.54	61.14	74.1	134.75	343	1.49	0.96	3.7	2	0.47	139	2	14.28	5.1	2	55.09	1	5.84997	1.52088	3.57139	1.58148	138.07	5.08104	0	0	0	0	0	0	0	160	4.4	205	0	0
2	25	110	70	100	60	105	65	163	53	70	19.95	60	185.54	58	91.33	64.1	36.3	62.13	306	1.42	0.73	5.31	3	0.2	60.7	3	13.57	5.2	2	27.49	0	4.79928	0.701242	2.81981	1.65804	109.014	5.06938	0	0	0	0	0	0	0	176	6.73	245	0	0
1	44	120	90	110	70	115	80	170	55	76	19.03	85	153.66	68	69.97	70.79	468.6	83.99	391	1.53	0.54	3.14	2	0.24	180.1	2	17.64	4.9	2	19.44	0	3.97465	0.947968	1.70905	1.83109	66.072	3.88377	0	0	0	0	0	0	0	167	7.35	371	0	0
1	47	120	85	110	75	115	80	173	76	93	25.39	60	175.08	77	146.99	32.4	30.9	254.62	360	1.03	0.76	1.17	1	0.47	145.4	2	16.96	5.1	2	53.62	0	4.52871	2.87381	2.37341	0.838076	91.756	8.15886	0	1	0	0	1	0	0	185	7.31	211	0	0
2	51	120	90	110	80	115	85	148	48	74	21.91	61	135.92	56	105.04	52.18	6.8	54.26	285	1.17	0.54	17.42	4	0.4	106.1	3	11.84	86.2	4	16.2	0	3.51578	0.612415	1.88536	1.34972	72.888	5.83037	0	0	0	0	0	0	0	164	10.28	217	0	0
1	36	130	80	120	70	125	75	174	58	70	19.16	61	151.79	87	84.24	67.01	22.2	67.78	334	1.5	0.51	4.46	3	0.21	350.4	4	19.88	6.4	4	18.44	0	3.92628	0.765011	1.84232	1.73332	71.224	4.67584	0	0	0	0	0	0	0	173	5.9	209	0	0
1	60	110	70	100	65	105	67.5	160	43	66	16.8	66	198.16	93	108.76	56.52	652.8	93.63	299	1.47	0.83	1.53	1	0.22	766.5	4	19.4	9.5	4	37.88	0	5.12571	1.05677	3.17936	1.46198	122.914	6.03686	0	0	0	0	0	1	0	191	10.56	169	0	0
1	58	110	80	100	70	105	75	173	57	76	19.05	59	187.69	63	99	74.01	244.1	69.54	311	1.7	0.72	5.23	3	0.22	139	2	18.11	5.9	3	28.74	0	4.85489	0.784876	2.58076	1.91438	99.772	5.49512	0	0	0	0	0	1	0	178	8.9	239	0	0
1	62	134	79	125	80	129.5	79.5	170	54.5	78	18.86	84	181.6	73	80.58	54.03	128.4	83.84	323	1.44	0.75	4.56	3	0.76	176.2	2	17.25	4.9	2	29.65	0	4.69736	0.946275	2.86606	1.39757	110.802	4.47269	0	0	0	0	0	0	0	120	5.85	229	0	0
1	51	140	90	140	90	140	90	175	73.5	88	24	69	174.46	98	78.01	36.75	54.6	135.52	393	1.14	0.86	3.31	2	0.4	387.2	4	24.88	4.6	1	48.63	0	4.51267	1.52957	2.86099	0.950595	110.606	4.33004	0	1	0	1	0	1	1	140	7.59	194	0	0
1	38	127	70	117	68	122	69	167	68.5	89	24.56	58	195.32	79	66.07	36.11	52.3	225.28	345	1.13	0.83	4.87	3	0.67	228.3	3	15.34	4.8	2	52.2	0	5.05225	2.54266	2.95277	0.93404	114.154	3.6673	0	1	0	0	0	1	1	140	8.41	248	0	0
2	28	120	73	132	72	126	72.5	154	68	87	28.67	80	126.49	50	68.67	44.22	302.6	53.17	351	1.12	0.52	0.97	1	0.51	5.4	1	23.08	5.5	3	16.9	0	3.27186	0.600113	1.85297	1.14382	71.636	3.81161	0	0	0	0	0	0	0	141	6.17	220	0	0
1	28	134	68	126	67	130	67.5	175	76.5	87	24.98	74	224.92	76	81.07	33.08	99.7	179.71	421	1.04	1.08	4.24	2	0.38	183.9	2	18.84	5.9	3	71.55	1	5.8179	2.02833	4.03254	0.855665	155.898	4.49989	0	1	0	0	0	0	0	120	6.32	200	0	0
1	18	122	74	120	70	121	72	173	63.5	70	21.22	91	120.26	84	83.57	50.98	292.8	40.67	436	1.1	0.5	5.62	4	0.33	68.6	1	17.39	4.7	1	15.51	0	3.11071	0.459029	1.58163	1.31868	61.146	4.63865	0	0	0	0	0	0	0	150	6.14	278	0	0
2	22	110	81	110	80	110	80.5	158	56.5	78	22.63	81	177.93	52	74.33	52.31	50.4	54.66	264	1.22	0.78	4.42	2	0.34	10.3	1	14.11	4.9	2	26.47	0	4.60243	0.61693	2.96658	1.35308	114.688	4.12578	0	0	0	0	0	0	0	159	7.11	214	0	0
1	23	121	84	120	80	120.5	82	179	71.5	80	22.32	89	154.15	73	78.5	37.54	67.4	140.34	327	1.08	0.66	4.93	3	0.36	144.3	2	16.67	4.9	2	30.72	0	3.98733	1.58397	2.29027	0.971029	88.542	4.35724	0	1	0	0	0	1	0	150	6.39	276	0	0
1	30	120	73	120	70	120	71.5	173	61.5	79	20.55	64	114.29	53	67.84	36.46	167.4	51.41	232	1	0.53	4.96	3	0.8	148	2	11.81	6.3	4	15.57	0	2.95629	0.580248	1.74723	0.943094	67.548	3.76554	0	1	0	0	0	1	0	150	6.28	187	0	0
2	30	126	76	119	85	122.5	80.5	164	57	72	21.19	63	133.91	60	71.66	46.03	24.1	93.75	261	1.09	0.54	0.55	1	0.48	3.9	1	19.3	5.2	2	20.08	0	3.46379	1.05813	1.78815	1.19064	69.13	3.97758	0	0	0	0	0	0	0	113	5.68	201	0	0
1	28	123	72	125	69	124	70.5	183	88	100	26.28	78	148.26	84	64.33	33.08	76	205	523	1.08	0.64	2.71	2	0.41	21.6	1	17.5	4.7	1	41.92	0	3.83497	2.31377	1.91878	0.855665	74.18	3.57071	0	1	0	0	0	1	1	140	6.83	250	0	0
1	34	135	85	131	75	133	80	162	61	82	23.24	72	211.41	83	85.58	57.86	65.5	81.52	421	1.43	0.9	3.55	2	0.2	297.2	3	16.2	5.3	3	41.78	0	5.46844	0.92009	3.55008	1.49664	137.246	4.75022	0	0	0	0	0	0	1	150	9.67	289	0	0
2	25	104	61	101	55	102.5	58	153	50.5	73	21.57	68	131.28	65	70.1	38.01	296.9	84.3	278	0.96	0.63	5.08	3	0.38	17.7	2	13.84	4.8	1	20.97	0	3.39576	0.951467	1.97646	0.983187	76.41	3.89099	0	1	0	0	0	0	0	140	5	281	0	0
1	42	127	81	129	78	128	79.5	166	58.5	65	21.23	75	259.5	82	68.22	48.15	123	95.83	353	1.36	1.18	2.84	2	0.19	325.6	4	19.88	6	3	75.71	1	6.71236	1.0816	4.97113	1.24547	192.184	3.78663	0	1	0	0	0	0	0	179	8.31	259	1	1
1	53	110	71	113	66	111.5	68.5	164	58	72	21.56	62	146.93	88	88.54	42.75	41.8	48.03	277	1.03	0.67	1.87	1	0.08	227.2	3	18.14	5	2	25.64	0	3.80057	0.542099	2.4463	1.10579	94.574	4.91452	0	0	0	0	0	0	0	166	6.93	187	0	0
2	22	93	59	108	65	100.5	62	155	45	59	18.73	87	165.75	59	74.07	51.26	25.4	106.98	311	1.32	0.63	3.98	2	0.24	17.7	2	17.93	4.6	1	25.95	0	4.28738	1.20745	2.40802	1.32592	93.094	4.11135	0	0	0	0	0	0	0	152	8.43	235	0	0
2	35	118	74	125	71	121.5	72.5	161	45	60	17.36	81	103.85	51	86.39	30.83	29.9	51.31	265	0.81	0.53	31.4	4	5.41	14.2	2	13.84	98.8	4	17.48	0	2.68624	0.57912	1.62333	0.797465	62.758	4.79518	0	1	0	0	0	0	0	118	7.41	303	0	0
1	67	112	53	105	66	108.5	59.5	166	54	70	19.6	72	127.14	67	76.53	43.69	159.6	58.07	341	1.05	0.61	12.74	4	1.12	54.7	1	19.02	7.3	4	21.33	0	3.28867	0.655418	1.85815	1.13011	71.836	4.24789	0	0	0	0	0	0	0	195	8.96	200	0	0
2	20	110	75	122	86	116	80.5	163	43	62	16.18	78	141.9	51	73.55	50.08	135	44.45	184	1.16	0.61	3.39	2	0.03	47.3	3	15.37	5.3	2	21.08	0	3.67046	0.501693	2.14511	1.2954	82.93	4.08248	1	0	0	1	0	0	0	153	7.63	211	0	0
2	20	120	73	111	72	115.5	72.5	166	53	75	19.23	75	137.88	57	79.55	58.11	40.2	37.13	264	1.19	0.57	3.51	2	0.38	13.7	2	20.32	5.2	2	18.93	0	3.56648	0.419074	1.87129	1.5031	72.344	4.41552	0	0	0	0	0	0	0	139	5.08	256	0	0
1	22	105	49	128	63	116.5	56	168	55	70	19.49	77	143.43	73	87.85	50.03	37.3	62.42	421	1.17	0.64	4.99	3	0.15	191.7	2	58.17	6.2	3	26.5	0	3.71004	0.704515	2.09302	1.2941	80.916	4.87622	0	0	0	0	0	0	0	156	5.83	151	0	0
2	27	101	59	100	57	100.5	58	163	44	60	16.56	62	143.36	62	64.49	40.85	58.1	155.61	254	1.15	0.63	5.55	4	0.29	2.5	1	18.32	4.5	1	34.15	0	3.70823	1.75632	1.84656	1.05665	71.388	3.5796	0	0	0	0	0	0	0	138	6.35	229	0	0
1	30	137	70	155	77	146	73.5	165	78	97	28.65	68	205.26	71	91.46	48.12	32.8	191.46	422	1.23	0.84	1.36	1	0.39	359.9	4	19.81	7.4	4	54.79	1	5.30936	2.16095	3.07419	1.2447	118.848	5.0766	0	0	0	1	0	0	0	179	7.67	224	0	0
1	18	111	63	103	52	107	57.5	181	60.3	70	18.41	83	98.59	58	91.95	41.47	246.9	79.28	332	0.97	0.39	5.7	4	0.06	46.3	1	15.91	4.5	1	14.41	0	2.55018	0.894808	1.06736	1.07268	41.264	5.1038	0	0	0	0	0	0	0	174	5.37	186	0	0
2	20	113	65	188	65	150.5	65	155	56.3	73	23.43	93	133.71	53	71.3	45.95	60.3	98.42	255	1.2	0.58	3.53	2	0.22	1	1	18.03	6.5	3	25.06	0	3.45861	1.11084	1.76089	1.18857	68.076	3.95759	0	0	0	1	0	0	0	162	8.11	220	0	0
1	54	150	106	137	102	143.5	104	181	96	110	29.3	71	184.1	86	82.93	44.05	22.2	56.45	382	1.16	0.85	3.5	2	0.26	151.2	2	26.49	4.8	2	36.73	0	4.76203	0.637133	3.33057	1.13942	128.76	4.60313	0	0	0	1	0	0	0	174	5.91	198	0	0
1	37	150	72	137	74	143.5	73	173	73	80	24.39	56	239.21	104	113.98	42.22	41.4	178.55	371	1.18	1.05	3.88	2	0.47	248.4	3	20.66	4.8	2	71.41	1	6.18753	2.01524	4.17175	1.09208	161.28	6.3266	0	1	0	1	0	0	0	180	7.79	228	0	1
2	33	120	77	125	72	122.5	74.5	157	42	64	17.04	91	157.28	65	92.24	85.35	451.6	44.88	249	1.51	0.52	4.62	3	0.23	9.8	1	19.33	5.6	3	18.78	0	4.06829	0.506546	1.6284	2.20771	62.954	5.11989	0	0	0	0	0	0	0	145	9.22	323	0	0
1	66	153	93	150	95	151.5	94	163	69	90	25.97	80	171.41	72	89.35	31.2	290.2	164.92	256	1.05	0.81	3.88	2	0.2	32.9	1	21.16	5	2	49.5	0	4.43378	1.8614	2.77356	0.807036	107.226	4.95948	1	1	0	1	0	0	0	181	6.64	186	0	0
1	35	0	0	0	0	0	0	181	75	85	22.89	0	134.88	80	74.25	43.94	13.9	69.04	476	1.18	0.63	0.38	1	0.18	117.5	1	25.44	5.8	3	27.65	0	3.48888	0.779233	1.99514	1.13658	77.132	4.12134	0	0	0	0	0	0	0	172	8.21	198	0	0
1	39	127	77	116	69	121.5	73	165	68	85	24.98	76	160.74	73	84.6	42.51	514.1	85.81	384	1.14	0.7	3.97	2	0.34	615.2	4	13.84	4.9	2	40.77	0	4.15779	0.96851	2.61428	1.09959	101.068	4.69583	0	0	0	0	0	0	0	181	4.41	228	0	0
1	31	127	69	122	59	124.5	64	172	64	81	21.63	74	177.58	72	87.94	29.5	51.4	180.17	361	1	0.81	4.56	3	0.36	197.9	2	13.13	5.3	3	52.68	0	4.59338	2.03352	2.89824	0.763063	112.046	4.88122	0	1	0	0	0	0	0	175	6.07	238	0	0
1	29	140	54	112	63	126	58.5	173	58	71	19.38	82	107.37	70	82.04	38.32	145.1	45.21	402	1.02	0.53	6.17	4	0.02	176.2	2	19.16	19.9	4	17.41	0	2.77729	0.510271	1.5522	0.991205	60.008	4.55373	0	1	0	0	0	0	0	174	9.59	301	0	0
2	47	137	80	148	76	142.5	78	157	71	89	28.8	82	158.94	46	95.24	54.81	46.2	66.79	331	1.31	0.7	9.61	4	0.38	61.2	3	12.91	9.5	4	25.57	0	4.11123	0.753837	2.34796	1.41774	90.772	5.28641	0	0	0	1	0	0	0	156	7.48	184	0	0
1	47	116	77	116	79	116	78	177	88.4	103	28.22	68	218.89	96	96.76	38.62	306.8	155.44	447	1.23	1.09	4.32	3	0.19	283.9	3	20.93	5.8	3	64.4	1	5.66192	1.7544	3.85882	0.998965	149.182	5.37078	0	1	0	0	0	0	0	167	6.06	246	0	0
2	37	115	57	113	57	114	57	152	62	82	26.84	85	160.95	74	77.35	48.8	115.7	41.5	341	1.16	0.71	2.19	1	0.12	21.6	2	14.63	6.3	3	26.25	0	4.16322	0.468397	2.68624	1.26229	103.85	4.29341	0	0	0	0	0	0	0	164	7.19	209	0	0
1	23	140	81	126	79	133	80	173	79	86	26.4	71	209.12	68	111.42	27.28	126.5	379.61	421	1.01	0.81	1.32	1	0.41	387.2	4	16.09	5.3	3	65.81	1	5.40921	4.28454	2.73973	0.705639	105.918	6.1845	0	1	0	0	0	0	0	171	6.99	270	0	0
1	40	114	72	114	70	114	71	177	73	85	23.3	54	225.41	76	80.68	39.86	73.5	193.2	302	1.12	0.96	0.39	1	0.4	149.6	2	26.16	5.1	2	54.59	1	5.83057	2.18059	3.80005	1.03104	146.91	4.47824	0	1	0	0	0	0	0	172	8.78	246	0	0
1	46	115	72	107	69	111	70.5	172	68.4	92	23.12	60	183.06	74	70.64	35.56	561.7	87.14	297	1.03	0.86	22.12	4	0.46	417	4	18.88	15.4	4	47.05	0	4.73513	0.983521	3.36451	0.919814	130.072	3.92096	0	1	0	0	0	0	0	179	7.93	231	0	0
1	61	137	80	127	82	132	81	174	56	70	18.5	86	197.2	59	82.52	42.05	562.3	132.34	281	1.23	0.87	4.26	2	0.79	42.8	1	20.32	5.4	3	50.43	0	5.10088	1.49368	3.32856	1.08769	128.682	4.58037	0	0	0	0	0	0	0	178	7.85	247	0	0
1	46	95	70	102	75	98.5	72.5	171	56	73	19.15	96	201.36	94	56.72	49.79	331.4	94.36	339	1.23	0.89	2.62	2	0.42	190.1	2	23.87	5	2	40.56	0	5.20848	1.06501	3.43244	1.28789	132.698	3.14831	0	0	0	0	0	0	0	186	8.71	252	0	0
1	36	114	67	115	67	114.5	67	164	58	75	21.56	79	190.75	76	72.1	40.13	0	144.94	318	1.15	0.87	5.44	4	0.24	336.9	4	15.37	4.4	1	48.05	0	4.93404	1.63589	3.1462	1.03802	121.632	4.002	0	0	0	0	0	0	0	169	5.65	131	0	0
2	34	109	58	107	70	108	64	158	44	70	17.63	72	111.6	60	71.48	49.33	0	302.98	221	1.2	0.42	5.75	4	0.24	28	2	16.7	4.1	1	11.83	0	2.8867	3.41964	0.0433006	1.276	1.674	3.96758	0	1	0	0	0	0	0	149	6.99	242	0	0
2	31	116	56	116	59	116	57.5	166	42	60	15.24	0	132.18	61	73.53	57.23	0	53.32	250	1.31	0.53	5.68	4	0.36	11.8	1	13.33	4.2	1	17.22	0	3.41904	0.601806	1.66286	1.48034	64.286	4.08137	0	0	0	0	0	0	0	128	12.11	332	0	0
2	31	106	64	99	61	102.5	62.5	166	53.7	69	19.49	78	133.29	42	81.13	52.73	0	83.9	280	1.03	0.62	3.26	2	0.22	6.4	1	15.95	4.7	1	27.52	0	3.44775	0.946953	1.64977	1.36394	63.78	4.50322	0	0	0	0	0	0	0	121	9.61	241	0	0
1	59	140	105	130	95	135	100	170	59	82	20.42	85	188.04	88	100.8	42	165.2	105.72	354	1.24	0.89	3.37	2	0.31	217.9	3	23.54	7.9	4	43.06	0	4.86394	1.19323	3.23063	1.08639	124.896	5.59503	1	0	0	1	0	1	1	189	6.58	234	0	0
2	42	110	80	100	70	105	75	159	64	81	25.32	63	199.95	60	107.43	39.4	612.3	90.71	270	1.06	0.98	4.75	3	0.24	67.6	3	15.37	4.8	1	42.01	0	5.17201	1.02381	3.6836	1.01914	142.408	5.96303	0	1	0	0	0	0	0	153	6.44	279	0	0
1	27	120	80	110	70	115	75	168	60	86	21.26	68	169.25	68	77.22	32.32	92.7	113.68	464	0.99	0.82	14.42	4	0.29	282	3	15.8	54.3	4	35.65	0	4.37791	1.28307	2.9538	0.836006	114.194	4.28619	0	1	0	0	0	1	0	167	13.51	253	0	0
1	73	160	90	150	80	155	85	164	54	79	20.08	58	175.42	89	81.08	51.35	71.6	55.14	286	1.22	0.79	3.74	2	1.74	297.8	3	23.51	4.6	1	27.06	0	4.53751	0.622348	2.924	1.32825	113.042	4.50044	1	0	0	1	0	0	0	180	7.1	207	0	0
1	25	120	70	110	65	115	67.5	147	60	76	27.77	56	110.26	89	80.8	34.32	85	96.64	307	0.92	0.47	5.62	4	0.13	173.5	2	19.64	4.4	1	16.61	0	2.85204	1.09074	1.46436	0.887739	56.612	4.4849	0	1	0	0	0	0	0	160	7.37	222	0	0
1	38	120	80	110	70	115	75	178	75	90	23.67	58	219.02	82	96.6	31.49	29.3	327.11	344	1.04	0.92	3.82	2	0.29	331.6	4	23.31	4.5	1	65.52	1	5.66529	3.69199	3.15851	0.814537	122.108	5.3619	0	1	0	0	0	1	0	175	7.39	167	0	0
1	62	140	100	130	90	135	95	162	64	89	24.39	58	187.69	82	105.1	85.96	203.5	48.01	874	1.85	0.69	1.44	1	0.96	282.7	3	29.42	5.5	3	25.24	0	4.85489	0.541874	2.38303	2.22349	92.128	5.8337	0	0	0	1	0	0	0	176	6.69	229	0	0
2	19	100	70	90	60	95	65	154	45	64	18.97	58	120.66	62	70	39.58	79.2	52.73	419	0.99	0.54	5.44	4	0.22	73.2	3	16.7	5.2	2	16.52	0	3.12106	0.595147	1.82447	1.0238	70.534	3.88544	0	1	0	0	0	0	0	137	6.04	237	0	0
2	20	120	70	100	60	110	65	160	50	67	19.53	58	139.24	67	80.94	56.89	594.8	37.08	280	1.18	0.58	5.66	4	0.02	30.5	2	11.01	5.7	3	21.77	0	3.60166	0.41851	1.93828	1.47155	74.934	4.49267	0	0	0	0	0	0	0	141	6.36	244	0	0
1	64	140	90	130	80	135	85	167	63	90	22.59	69	163.02	66	0.07	51.56	88.2	76.73	336	1.28	0.73	2.84	2	0.25	414.8	4	20.01	4.9	2	31.65	0	4.21676	0.866027	2.48614	1.33368	96.114	0.00388544	0	0	0	0	0	0	0	199	7.33	193	0	0
1	64	160	110	150	100	155	105	165	53	84	19.47	87	143.26	78	95.73	31.86	157.1	93.31	272	0.96	0.74	3.23	2	0.29	269.7	3	19.95	6.8	4	32.91	0	3.70564	1.05316	2.39881	0.824108	92.738	5.31361	1	1	0	1	0	0	0	200	6.32	178	0	0
1	52	120	70	110	60	115	65	168	70	86	24.8	58	179.99	74	85.42	41.21	93.7	80.9	354	1.11	0.83	2.5	1	0.11	150.7	2	18.18	4.9	2	37.64	0	4.65572	0.913093	3.17124	1.06596	122.6	4.74134	0	0	0	0	0	1	0	177	5.65	196	0	0
1	65	140	90	130	80	135	85	164	79	109	29.37	60	189.22	55	126.36	29.13	285	133.54	294	1.03	1.04	22.79	4	0.58	213.3	3	19.95	18.8	4	57.68	1	4.89446	1.50722	3.45013	0.753492	133.382	7.01377	1	1	0	1	1	1	0	158	5.64	291	0	0
1	40	136	86	126	78	131	82	167	65	87	23.31	70	141.39	76	77.12	34.06	45	155.03	322	1.03	0.57	6.13	4	0.29	94.9	1	15.95	4.9	2	28.35	0	3.65727	1.74977	1.97424	0.881014	76.324	4.28064	0	1	0	0	0	1	1	173	7.85	223	0	0
1	50	125	82	115	75	120	78.5	170	53.5	78	18.51	80	204.33	89	79	38.78	450.3	121.68	302	1.1	0.96	4.68	3	0.35	56.2	1	29.21	4.5	1	53.45	0	5.28531	1.37336	3.65272	1.0031	141.214	4.38499	0	1	0	0	0	1	1	172	9.71	251	0	0
1	35	120	78	110	69	115	73.5	176	88.5	95	28.57	71	200.1	72	94.2	37.86	244.7	329.64	431	1.12	0.85	2.07	1	0.48	340.2	4	20.08	7.9	4	60.7	1	5.17589	3.72054	2.49126	0.979307	96.312	5.22869	0	1	0	0	0	0	0	164	8.31	251	0	0
1	37	95	74	90	60	92.5	67	167	63	80	22.59	60	224.71	98	85.11	53.45	91.7	71.38	418	1.36	0.99	0.01	1	0.27	346.3	4	22.82	6.1	3	47.41	0	5.81247	0.805643	4.06063	1.38257	156.984	4.72413	0	0	0	0	0	1	0	170	6.3	283	0	0
2	23	116	78	105	67	110.5	72.5	160	41	58	16.02	61	157.41	53	80.52	46.04	224.1	55.36	308	1.17	0.7	5.11	3	0.27	55.2	3	16.92	7.8	4	34.06	0	4.07165	0.624831	2.59436	1.19089	100.298	4.46936	0	0	0	0	0	0	0	157	4.62	302	0	0
2	25	120	77	111	69	115.5	73	152	40.5	62	17.53	60	116.53	61	123.93	47.23	51.1	50.48	247	1.04	0.51	4.56	2	0.33	44.8	3	9.87	8.5	4	11.51	0	3.01423	0.569752	1.5314	1.22168	59.204	6.87889	0	0	0	0	0	0	0	155	9.57	313	0	0
1	23	170	76	135	75	152.5	75.5	163	70	89	26.35	89	190.35	62	96.77	20.06	26.7	502.34	385	0.85	0.77	3.51	2	0.38	212.1	3	60.39	7.2	4	41.93	0	4.92369	5.66975	1.80605	0.518883	69.822	5.37134	0	1	0	1	0	1	0	214	10.68	178	0	0
2	38	113	67	115	68	114	67.5	163	57	78	21.45	78	156.12	53	83.41	41.76	629.9	62.52	196	1.07	0.69	0.5	1	0.37	50.2	3	9.03	5.1	2	23.94	0	4.03828	0.705643	2.63466	1.08019	101.856	4.62977	0	0	0	0	0	0	0	149	6.31	340	0	0
1	48	125	79	125	75	125	77	178	88	107	27.77	78	204.98	84	103.3	26.58	67.1	288.92	384	1.02	0.92	3.3	2	0.48	547.9	4	24.39	7.2	4	62.13	1	5.30212	3.26095	3.11992	0.687532	120.616	5.73379	0	1	0	0	0	1	1	145	9.1	340	0	0
2	19	120	78	120	75	120	76.5	165	61	84	22.41	78	215.73	46	79.24	71.89	200.5	191.66	288	1.86	0.9	2.34	1	1.58	20.6	2	11.13	5.9	3	52.51	0	5.58019	2.16321	2.72913	1.85954	105.508	4.39831	0	0	0	0	0	0	0	164	6.63	184	0	0
1	48	110	62	110	60	110	61	177	59	73	18.83	78	171.99	68	88.93	74.43	24.1	62.43	291	1.63	0.63	4.24	2	0.27	368.9	4	16.23	5	2	24.15	0	4.44878	0.704628	2.20057	1.92525	85.074	4.93617	0	0	0	0	0	1	0	169	7.4	163	0	0
1	38	120	80	110	70	115	75	169	61	72	21.36	56	150.33	100	77.68	40.24	32.8	106.87	250	1.11	0.64	3.92	2	0.38	196.8	2	27.39	4.9	2	28.07	0	3.88852	1.20621	2.29477	1.04087	88.716	4.31172	0	0	0	0	0	1	0	113	6.25	425	0	0
2	19	100	70	90	60	95	65	149	35	57	15.77	68	154.42	70	80.53	57.13	20	120.03	274	1.28	0.57	5.51	4	0.37	5.4	1	14.59	5.3	2	24.22	0	3.99431	1.35474	1.8956	1.47775	73.284	4.46992	0	0	0	0	0	0	0	124	9.55	393	0	0
1	42	120	80	110	70	115	75	180	61	80	18.83	54	186.86	73	126.22	72.07	24.8	111.69	277	1.61	0.66	3.5	2	0.26	196.8	2	18.84	5.4	3	27.8	0	4.83342	1.26061	2.39141	1.8642	92.452	7.00599	0	0	0	0	1	1	1	165	6.33	215	0	0
2	58	130	90	120	80	125	85	154	64	94	26.99	93	149.43	44	101.47	40.69	79.9	87.14	322	1.11	0.69	5.47	4	0.31	125.8	4	15.66	7.1	4	35.86	0	3.86524	0.983521	2.36192	1.05251	91.312	5.63222	0	0	0	0	0	0	0	172	5.62	201	0	0
1	69	140	90	130	80	135	85	178	74	99	23.36	57	215.76	78	85.84	60.21	611.6	98.62	474	1.52	0.97	2.62	2	1.88	240.7	3	21.19	5.6	3	49.22	0	5.58096	1.11309	3.51335	1.55742	135.826	4.76465	0	0	0	0	0	0	0	180	5.41	183	0	0
1	39	127	60	124	66	125.5	63	162	58	80	22.1	66	144.1	88	70.93	41.31	108.4	129.31	348	1.11	0.6	5.47	4	0.49	420.7	4	18.77	5.9	3	27.44	0	3.72737	1.45948	1.98986	1.06855	76.928	3.93706	0	0	0	0	0	0	1	140	7.04	204	0	0
2	49	107	62	106	62	106.5	62	160	44	80	17.19	67	139.46	71	74.02	39.81	67.1	72.9	289	1.1	0.63	5.45	4	0.39	107.2	3	16.78	4.9	2	22.39	0	3.60735	0.822799	2.20047	1.02975	85.07	4.10857	0	1	0	0	0	0	0	120	4.14	293	0	0
1	49	119	81	122	80	120.5	80.5	157	71	95	28.8	70	244.47	79	88.12	28.38	205.6	454.37	453	1	0.92	1.92	1	0.33	326.3	4	14.73	5.5	3	65.05	1	6.32359	5.12833	3.2389	0.734092	125.216	4.89121	0	1	0	0	0	0	1	140	7.52	281	1	0
1	38	121	64	116	62	118.5	63	177	87	106	27.77	64	177.3	72	87.32	37.87	36.3	150.62	359	1.11	0.83	3.45	2	0.28	238.3	3	17.53	6.4	4	47.06	0	4.58614	1.7	2.82737	0.979565	109.306	4.8468	0	1	0	0	0	0	1	140	7.36	230	0	0
1	21	124	64	120	73	122	68.5	178	58.5	75	18.46	71	137.52	75	69.5	40.37	25.7	89.58	384	1.1	0.61	5.79	4	0.4	22.1	1	15.05	4.2	1	28.05	0	3.55717	1.01106	2.04951	1.04423	79.234	3.85768	0	0	0	0	0	0	0	150	6.38	276	0	0
1	35	112	76	121	80	116.5	78	179	79	86	24.66	68	158.93	85	79.89	33.35	25.4	251.96	421	1.02	0.66	4.77	3	0.46	274.6	3	22.65	5.9	3	41.71	0	4.11097	2.84379	1.94485	0.862649	75.188	4.43439	0	1	0	0	0	0	1	120	6.75	238	0	0
1	28	115	74	118	75	116.5	74.5	176	77	88	24.86	84	203.3	87	90.89	26.54	37.9	288.09	426	0.91	0.88	5.43	4	0.41	226.6	3	17.03	6	3	62.24	1	5.25867	3.25158	3.08179	0.686498	119.142	5.04496	0	1	0	0	0	0	0	150	6.21	200	0	0
1	30	109	73	117	73	113	73	172	73.5	90	24.84	75	188.39	79	77.21	32.41	23.5	187.31	466	0.94	0.81	0.11	1	0.34	325.6	4	17.39	5.4	3	53.2	0	4.873	2.11411	3.06565	0.838334	118.518	4.28563	0	1	0	0	0	0	1	150	6.62	264	0	0
1	32	121	80	117	81	119	80.5	172	83.5	97	28.22	80	202.88	69	105.58	25.23	174.2	271.88	445	0.88	0.94	1.27	1	0.51	196.8	2	13.67	6.5	4	64.96	1	5.2478	3.06862	3.18867	0.652613	123.274	5.86035	0	1	0	0	0	0	1	150	8.34	279	0	0
1	33	115	72	123	67	119	69.5	172	64	76	21.63	79	244.47	96	73.19	66.05	157.4	123.21	483	1.81	1.02	5.37	4	0.36	358.6	4	24.72	6	3	64.75	1	6.32359	1.39063	3.9777	1.70848	153.778	4.0625	0	1	0	0	0	0	1	140	8.51	274	1	0
1	31	109	61	104	60	106.5	60.5	177	57	76	18.19	44	137.87	81	77.08	54.37	9.1	81.06	306	1.28	0.52	5	3	0.3	266	3	19.81	4.7	1	20.96	0	3.56622	0.914898	1.74051	1.40636	67.288	4.27842	0	0	0	0	0	0	0	140	7.64	280	0	0
2	37	125	77	116	73	120.5	75	165	51	76	18.73	80	148.59	56	77.81	52.64	255.1	61.37	198	1.26	0.61	5.51	4	0.45	2.5	1	11.87	4.8	1	24.36	0	3.84351	0.692664	2.16441	1.36161	83.676	4.31894	0	0	0	0	0	0	0	124	8.17	329	0	0
1	52	164	88	162	82	163	85	165	68	90	24.98	74	204.22	85	81.46	32.99	67.7	121.06	579	0.98	1.07	3.53	2	0.29	478.7	4	16.96	5.4	3	61.36	1	5.28246	1.36637	3.80285	0.853337	147.018	4.52154	0	1	0	1	0	0	0	183	7.71	261	0	0
2	23	118	61	107	58	112.5	59.5	163	53	73	19.95	76	152.99	48	74.45	62.29	8.1	33.71	210	1.31	0.58	5.43	3	0.17	0	1	15.87	6	3	23.52	0	3.95732	0.380474	2.1717	1.61123	83.958	4.13244	0	0	0	0	0	0	0	114	6.31	243	0	0
2	21	110	52	102	59	106	55.5	164	43	52	15.99	99	133.31	53	80.11	43.85	42.7	44.91	347	0.96	0.61	5.68	4	0.16	17.7	2	23.11	4.3	1	17.7	0	3.44827	0.506885	2.08169	1.13425	80.478	4.4466	0	0	0	0	0	0	0	154	4.79	241	0	0
2	20	115	73	114	72	114.5	72.5	168	52	68	18.42	67	142.53	66	81.22	64.03	58.7	59.64	376	1.4	0.49	4.79	3	0.12	4.9	1	16.09	4.8	1	19.69	0	3.68676	0.673138	1.72199	1.65623	66.572	4.50821	0	0	0	0	0	0	0	146	6.29	170	0	0
1	32	122	69	103	77	112.5	73	168	50	63	17.72	73	158.41	68	81.95	47.32	26.4	71.78	361	1.15	0.73	4.89	3	0.22	368.2	4	18.35	4.8	2	31.39	0	4.09752	0.810158	2.50217	1.224	96.734	4.54873	0	0	0	0	0	0	0	182	3.96	166	0	0
2	23	98	60	98	70	98	65	165	53	58	19.47	74	111.76	71	83.96	52.72	35.7	66.59	237	1.14	0.45	5.63	4	0.23	20.6	2	22.32	4.7	1	14.5	0	2.89084	0.75158	1.18267	1.36368	45.722	4.6603	0	0	0	0	0	0	0	158	6.91	272	0	0
2	22	121	100	102	63	111.5	81.5	170	52	58	17.99	65	149.88	61	85.84	71.16	261.5	50.2	353	1.4	0.54	5.64	4	0.27	27	2	12.24	6.7	3	17.99	0	3.87688	0.566591	1.77651	1.84066	68.68	4.76465	0	0	0	0	0	0	0	147	8.27	261	0	0
2	24	110	73	109	69	109.5	71	160	48	60	18.75	81	149.12	54	89.83	70.55	295	39.54	284	1.34	0.56	5.11	3	0.05	66.6	3	15.62	4.8	1	18.09	0	3.85722	0.446275	1.82778	1.82488	70.662	4.98612	0	0	0	0	0	0	0	153	5.46	259	0	0
2	24	106	56	103	67	104.5	61.5	158	44	64	17.63	75	165.82	48	81.29	74.3	136.9	45.66	220	1.52	0.05	4.58	3	0.21	16.2	2	12.65	5.4	2	21.71	0	4.28919	0.51535	2.13109	1.92188	82.388	4.5121	0	0	0	0	0	0	0	136	7.15	323	0	0
1	45	117	73	106	76	111.5	74.5	172	73	78	24.68	71	192.14	88	80.95	34.76	35	207.63	528	0.99	0.87	2.34	1	0.36	186.2	2	22.91	6	3	61.25	1	4.96999	2.34345	2.99674	0.899121	115.854	4.49323	0	1	0	0	0	0	0	181	9.15	210	0	0
1	56	131	88	138	70	134.5	79	175	62	85	20.24	94	211.07	71	93.21	49.53	92.4	108.24	341	1.24	0.96	2.86	2	0.25	168.5	2	19.02	6.8	4	51.82	0	5.45965	1.22167	3.61852	1.28117	139.892	5.17373	0	0	0	0	0	0	0	185	12.77	231	0	0
2	31	119	70	117	67	118	68.5	164	88	95	32.72	85	170.17	61	85.96	39.35	51.4	176.04	345	1.17	0.74	3.22	2	0.38	118.5	4	12.24	4.9	2	38.68	0	4.40171	1.98691	2.47315	1.01785	95.612	4.77131	0	1	0	0	0	0	0	162	7.78	234	0	0
2	36	120	69	120	78	120	73.5	155	59	60	24.56	75	226.58	59	86.72	61.03	330.7	65.89	160	1.26	0.91	0.02	1	0.42	96.4	3	14.77	64.5	4	43.8	0	5.86084	0.743679	3.94133	1.57863	152.372	4.8135	0	0	0	0	0	0	0	136	8.54	201	0	0
1	47	148	95	146	97	147	96	180	79	85	24.38	72	179.03	69	94.63	47.24	305.8	75.16	229	1.19	0.78	4.92	3	0.28	373.1	4	18.77	6	3	36.42	0	4.63088	0.848307	3.02012	1.22193	116.758	5.25255	0	0	0	1	0	0	0	163	6.09	237	0	0
1	34	120	70	124	74	122	72	167	61	70	21.87	80	175.02	85	101.58	50.97	102.3	125.83	432	1.3	0.7	3.52	2	0.36	247.8	3	20.39	7.7	4	33.44	0	4.52716	1.4202	2.55779	1.31842	98.884	5.63832	0	0	0	0	0	0	0	174	6.77	241	0	0
1	25	201	179	113	68	157	123.5	165	62	72	22.77	70	174.95	67	74.98	34.16	86.3	126.76	255	1.01	0.83	5.59	4	0.25	465.2	4	19.64	5.1	2	53.89	0	4.52535	1.4307	2.98598	0.883601	115.438	4.16186	0	1	0	1	0	0	0	175	8.11	223	0	0
1	24	106	64	114	55	110	59.5	164	57	67	21.19	62	124.97	78	75.12	61.28	45.3	63.49	269	1.28	0.46	5.79	4	0.15	255.7	3	20.18	4.4	1	15.88	0	3.23254	0.716591	1.31899	1.5851	50.992	4.16963	0	0	0	0	0	0	0	181	4.23	167	0	0
2	22	108	70	110	71	109	70.5	160	42	65	16.41	89	173.49	55	82.97	56.03	17.4	48.76	254	1.23	0.69	5.68	4	0.39	2.5	1	23.51	5.2	2	33.09	0	4.48758	0.550339	2.78603	1.4493	107.708	4.60535	0	0	0	0	0	0	0	110	9.51	361	0	0
2	55	138	85	122	84	130	84.5	161	75	90	28.93	71	175.22	56	88.25	45.96	64.2	56.72	290	1.1	0.79	4.28	2	0.6	117	3	15.69	5.1	2	32.12	0	4.53233	0.640181	3.05008	1.18883	117.916	4.89842	0	0	0	0	0	0	0	185	9.03	221	0	0
2	41	100	54	104	59	102	56.5	172	68	85	22.99	67	145.14	59	95.57	39.38	63.2	85.17	347	1.05	0.66	0.65	1	0.12	24.6	2	13.84	10.2	4	27.53	0	3.75427	0.961287	2.29503	1.01862	88.726	5.30473	0	1	0	0	0	0	0	151	8.54	235	0	0
2	27	111	78	111	75	111	76.5	168	69	84	24.45	88	214.6	54	79.29	62.15	262.3	66.08	377	1.35	0.89	3.07	2	0.4	42.3	3	8.72	9.4	4	45.57	0	5.55096	0.745824	3.6015	1.6076	139.234	4.40109	0	0	0	0	0	0	0	163	9.37	295	0	0
2	30	117	75	123	73	120	74	164	64	73	23.8	72	149.78	57	79.44	45.84	270.9	43.26	357	1.1	0.62	0.53	1	0.36	37.4	2	17.32	5.5	3	20.87	0	3.87429	0.488262	2.46477	1.18572	95.288	4.40941	0	0	0	0	0	0	0	148	6.91	321	0	0
1	58	145	84	138	79	141.5	81.5	168	72	89	25.51	65	194.56	72	98.91	43.54	81.5	40.76	376	1.13	0.92	0.88	1	0.29	66.6	1	17.25	6.8	4	39.82	0	5.03259	0.460045	3.6955	1.12623	142.868	5.49012	0	0	0	1	0	0	0	163	10.32	231	0	0
1	53	110	53	107	64	108.5	58.5	173	63	85	21.05	65	163.92	68	88.15	40.39	295	105.51	333	1.11	0.76	1.14	1	0.22	195.1	2	13.9	10.9	4	42.51	0	4.24004	1.19086	2.64946	1.04475	102.428	4.89287	0	0	0	0	0	0	0	167	8.09	206	0	0
1	63	0	0	0	0	0	0	168	70	88	24.8	0	200.53	98	115.58	26.08	118.9	305.88	557	1.04	0.84	0.45	1	0.44	818.9	4	23.51	7.7	4	59.02	1	5.18702	3.45237	2.93001	0.674599	113.274	6.41541	1	1	0	1	0	0	0	164	9.17	338	0	0
2	44	112	53	108	58	110	55.5	0	0	0	20	76	144.04	63	90.58	60.86	31.8	40.21	257	1.26	0.55	5.47	4	0.88	13.7	2	9.87	5.1	2	17.08	0	3.72581	0.453837	1.94356	1.57424	75.138	5.02775	0	0	0	0	0	0	0	103	3.95	229	0	0
1	27	133	67	117	64	125	65.5	173	62	76	20.72	75	145.63	74	79.74	43.78	0	334.93	399	1.14	0.64	2.87	2	0.22	210.4	3	13.1	7.4	4	33.68	0	3.76694	3.78025	0.901811	1.13244	34.864	4.42607	0	1	0	0	0	0	0	179	8.87	201	0	0
1	33	130	81	129	83	129.5	82	178	68	80	21.46	62	134.33	61	84.22	38.97	0	155.97	348	1.09	0.59	2.12	1	0.41	371	4	19.88	7.4	4	27.85	0	3.47465	1.76038	1.65975	1.00802	64.166	4.67473	0	1	0	0	0	0	0	175	11.15	240	0	0
1	26	120	79	114	76	117	77.5	0	0	0	20	107	153.54	76	95.86	47.01	0	329.38	402	1.17	0.64	2.56	1	0.51	160.9	2	17.96	4.7	1	29.17	0	3.97155	3.71761	1.05158	1.21599	40.654	5.32083	0	1	0	0	0	0	0	177	8.09	252	0	0
2	69	120	80	110	60	115	70	140	42	80	21.43	68	215.07	83	85.59	49.34	150.8	105.9	405	1.36	1	1.87	1	0.51	495	4	18.98	5.8	3	42.12	0	5.56311	1.19526	3.73901	1.27625	144.55	4.75078	0	0	0	0	0	0	0	128	7.63	219	0	0
1	21	110	70	100	60	105	65	167	54	71	19.36	58	155.8	77	94.1	51.36	99.7	76.82	418	1.3	0.68	5.09	3	0.28	94.9	1	20.18	4.6	1	32.19	0	4.03001	0.867043	2.30409	1.3285	89.076	5.22313	0	0	0	0	0	0	0	186	7.53	273	0	0
1	36	120	80	100	70	110	75	164	67	88	24.91	58	238.98	69	96.22	37.69	135.4	182.89	350	1.08	1.09	4.3	3	0.28	383	4	14.45	5.3	3	70.56	1	6.18158	2.06422	4.26053	0.974909	164.712	5.34081	0	1	0	0	0	1	0	180	8.9	246	0	1
1	47	140	90	130	80	135	85	174	85	95	28.08	54	196.08	86	101.11	39.21	116.3	84.72	415	1.09	0.87	12.1	4	0.24	388.7	4	19.12	7	4	41.47	0	5.07191	0.956208	3.6194	1.01423	139.926	5.61223	0	1	0	0	0	0	0	178	10.33	272	0	0
1	39	100	80	90	60	95	70	169	56	76	19.61	60	170.58	82	95.21	36.69	25.7	70.09	280	0.99	0.84	4.58	3	0.2	151.2	2	15.98	4.6	1	34.29	0	4.41231	0.791084	3.10067	0.949043	119.872	5.28475	0	1	0	0	0	1	0	166	6.9	259	0	0
2	46	120	90	110	80	115	85	152	60	85	25.97	49	156.3	69	95.11	42.53	171.7	127.89	324	1.16	0.68	2.51	1	0.31	150.2	4	11.75	6.3	3	28.57	0	4.04294	1.44345	2.28122	1.1001	88.192	5.2792	0	0	0	0	0	0	0	150	5.28	173	0	0
1	28	118	76	107	65	112.5	70.5	180	69.5	81	21.45	60	257.84	66	89.93	35.27	240.8	369.2	386	1.09	1.04	5.6	4	0.37	308.7	4	19.36	5.1	2	79.54	1	6.66943	4.16704	3.84713	0.912312	148.73	4.99167	0	1	0	0	0	1	0	188	5.59	259	1	0
1	39	105	78	100	68	102.5	73	162	54	74	20.58	43	145.97	83	86.6	45.19	44	61.66	309	1.08	0.66	4.53	3	0.22	132.7	1	13.77	4.4	1	28.13	0	3.77574	0.695937	2.28784	1.16891	88.448	4.80684	0	0	0	0	0	0	0	166	8.46	178	0	0
1	32	120	78	112	65	116	71.5	165	61	69	22.41	60	164.68	91	85.35	44.91	220.6	101.95	379	1.14	0.71	5.17	3	0.24	508.3	4	16.16	4.4	1	31.97	0	4.2597	1.15068	2.57062	1.16167	99.38	4.73746	0	0	0	0	0	1	0	168	5.91	187	0	0
2	22	108	78	98	66	103	72	168	55	66	19.49	60	140.63	73	77.09	59.56	80.2	56.01	228	1.2	0.55	5.74	4	0.24	14.2	2	19.09	5.2	2	17.47	0	3.63761	0.632167	1.80724	1.54061	69.868	4.27897	0	0	0	0	0	0	0	145	6	258	0	0
1	30	114	58	114	58	114	58	165	52	70	19.1	78	139.76	86	85.56	32.55	28.3	107.26	322	1.01	0.68	5.17	3	0.14	150.7	2	13.9	4.9	2	36.24	0	3.61511	1.21061	2.21826	0.841956	85.758	4.74911	0	1	0	0	0	1	1	182	7.92	219	0	0
2	19	115	68	120	65	117.5	66.5	160	47	65	18.36	78	149.6	58	84	41.73	73.2	69.93	418	1.02	0.67	4.32	2	0.24	107.7	3	14.98	5.6	3	20.93	0	3.86963	0.789278	2.42845	1.07941	93.884	4.66252	0	0	0	0	0	0	0	159	7.32	362	0	0
1	25	123	75	120	75	121.5	75	179	63	75	19.66	78	187.51	84	90.21	28.39	723.1	148.12	422	0.94	0.93	5.8	4	0.37	234.2	3	18.98	4.8	2	56.69	1	4.85023	1.67178	3.34961	0.734351	129.496	5.00722	0	1	0	0	0	1	0	179	6.29	222	0	0
1	26	122	86	120	85	121	85.5	176	81	84	26.15	78	233.05	96	85.14	31.87	69.6	163.77	386	1	1.09	0.78	1	0.34	172.9	2	17.5	12.6	4	70.68	1	6.02819	1.84842	4.3566	0.824366	168.426	4.7258	0	1	0	0	0	1	1	168	8.9	242	0	1
2	32	115	62	110	65	112.5	63.5	155	49	73	20.4	78	185.92	55	50.38	46.11	91.7	151.82	283	1.15	0.76	5.05	3	0.3	3.4	1	12.65	4.7	1	37.78	0	4.80911	1.71354	2.83099	1.19271	109.446	2.7964	0	0	0	0	0	0	0	139	6.39	268	0	0
1	29	129	80	130	82	129.5	81	175	74	86	24.16	78	132.2	97	87.92	36.18	344.1	157.38	390	1.13	0.58	2.15	1	0.33	228.9	3	23.28	6.3	4	29.76	0	3.41956	1.7763	1.66953	0.935851	64.544	4.88011	0	1	0	0	0	0	1	184	6.11	234	0	0
2	37	129	83	130	80	129.5	81.5	156	68	90	27.94	78	145.09	60	75.14	53.08	21.6	79.38	251	1.32	0.54	8.93	4	0.29	73.7	3	12.4	12.9	4	18.12	0	3.75297	0.895937	1.96932	1.373	76.134	4.17074	0	0	0	0	0	0	0	156	5.49	225	0	0
2	26	116	73	115	70	115.5	71.5	158	55	70	22.03	78	124.79	57	81.53	41.31	89.5	60.67	291	0.95	0.54	1.33	1	0.24	12.3	2	11.51	5.4	2	16.74	0	3.22788	0.684763	1.84547	1.06855	71.346	4.52542	0	0	0	0	0	0	0	140	6.37	296	0	0
1	24	120	60	121	65	120.5	62.5	169	68	82	23.81	88	191.74	91	84.21	34.81	135	206.75	390	1	0.83	5.32	4	0.28	69.6	1	22.39	5.4	3	49	0	4.95965	2.33352	2.98965	0.900414	115.58	4.67418	0	1	0	0	0	1	1	192	7.69	268	0	0
1	28	130	85	128	80	129	82.5	176	74	77	23.89	78	188	70	81.71	38.26	572.5	139.41	421	1.04	0.92	3.05	2	0.36	150.2	2	17.39	5.9	3	50.36	0	4.86291	1.57348	3.15204	0.989653	121.858	4.53541	0	1	0	0	0	1	1	174	7.57	192	0	0
1	37	131	88	130	85	130.5	86.5	174	77	103	25.43	89	207.54	68	100.07	37.68	111.9	203.98	502	1.08	0.89	2.69	2	0.27	386.5	4	17.25	8.1	4	56.83	1	5.36834	2.30226	3.33844	0.974651	129.064	5.55451	0	1	0	0	0	1	1	182	10.44	210	0	0
1	23	122	63	120	60	121	61.5	175	54	71	17.63	78	131.79	80	89.24	60.13	17.7	110.79	374	1.39	0.48	3.35	2	0.24	302.3	3	8.79	10	4	18.32	0	3.40895	1.25045	1.28044	1.55535	49.502	4.95337	0	0	0	0	0	1	1	108	3.52	320	0	0
2	34	143	86	140	80	141.5	83	145	40	59	19.02	73	143.43	46	88.37	43.9	39.2	66.51	182	1	0.65	5.24	3	0.24	2.9	1	15.48	4.9	2	24.08	0	3.71004	0.750677	2.23042	1.13554	86.228	4.90508	0	0	0	1	0	0	0	163	6.53	189	0	0
1	31	126	73	125	70	125.5	71.5	161	62	90	23.92	50	242.41	86	84.8	33.02	19	141.64	482	0.97	1.22	4.08	2	0.33	321.7	4	15.77	4.8	2	70.1	1	6.27031	1.59865	4.68345	0.854113	181.062	4.70693	0	1	0	0	0	1	1	180	5.55	232	1	1
1	30	135	77	130	75	132.5	76	171	66	85	22.57	54	170.54	87	92.44	61	18.4	84.11	361	1.47	0.68	3.59	2	0.24	122.2	1	22.45	5.7	3	27.29	0	4.41128	0.949323	2.39829	1.57786	92.718	5.13099	0	0	0	0	0	0	1	110	3.54	305	0	0
1	19	120	80	110	70	115	75	170	54	69	18.69	60	152.69	84	89.59	56.22	240.5	44.43	393	1.18	0.61	5.4	4	0.09	294.6	3	24.42	4.4	1	20.37	0	3.94956	0.501467	2.26549	1.45422	87.584	4.9728	0	0	0	0	0	0	0	164	6.59	202	0	0
1	26	120	90	110	80	115	85	180	74	92	22.84	60	181.11	85	83.97	28.24	161.1	182.55	416	0.9	0.84	2.32	1	0.29	403.1	4	17.96	4.6	1	58.12	1	4.68469	2.06038	3.00983	0.730471	116.36	4.66086	0	1	0	0	0	0	0	100	5.4	424	0	0
2	44	120	90	110	80	115	85	154	58	80	24.46	72	189.01	54	82.89	35.03	92.4	109.93	306	1.03	0.88	3.97	2	0.27	69.6	3	13.57	5.4	2	48.19	0	4.88903	1.24074	3.41423	0.906105	131.994	4.60091	0	1	0	0	0	0	0	149	7.64	221	0	0
1	70	140	90	130	80	135	85	177	73	80	23.3	70	195.04	95	105.6	37.24	91.4	112.43	427	1.04	0.97	7.87	4	0.6	60.2	1	21.26	6.8	4	50.31	0	5.04501	1.26896	3.5001	0.96327	135.314	5.86146	0	1	0	0	0	1	0	182	6.25	288	0	0
1	37	140	88	141	85	140.5	86.5	181	87	98	26.56	101	164.9	60	98.7	31.47	20.6	186.34	450	1.01	0.74	7.58	4	0.26	563.9	4	19.12	6.8	4	39	0	4.26539	2.10316	2.48738	0.81402	96.162	5.47846	0	1	0	1	0	0	0	182	5.88	233	0	0
1	32	134	74	131	73	132.5	73.5	160	62.5	90	24.41	53	204.82	89	88.36	40.81	35.7	292.54	362	1.26	0.76	3.62	2	0.29	187.3	2	18.67	6.4	4	45.88	0	5.29798	3.30181	2.72897	1.05561	105.502	4.90453	0	1	0	0	0	1	1	120	7.85	276	0	0
1	39	135	81	135	74	135	77.5	172	64.5	85	21.8	59	189.01	83	74.33	46.37	163	52.07	361	1.24	0.86	4.83	3	0.54	106.1	1	21.69	4.7	1	37.84	0	4.88903	0.587698	3.42023	1.19943	132.226	4.12578	0	0	0	0	0	0	0	160	5.2	252	0	0
2	61	130	79	140	79	135	79	154	46.5	90	19.61	60	214.45	61	87.84	74.38	24.1	74.85	259	1.88	0.76	3.58	2	0.2	269.7	4	18.6	6.1	3	31.5	0	5.54708	0.844808	3.2359	1.92395	125.1	4.87567	0	0	0	0	0	0	0	158	6.03	300	0	0
2	57	160	87	169	94	164.5	90.5	162	63.5	105	24.2	74	204.2	37	311.48	47.89	54.6	178.97	172	1.27	0.89	0.17	1	0.44	348.3	4	14.95	6.1	3	51.94	0	5.28195	2.01998	3.11733	1.23875	120.516	17.2891	0	0	1	1	1	0	0	154	5.48	226	0	0
1	30	130	80	125	85	127.5	82.5	178	81	100	25.56	70	212.37	65	94.09	36.11	31.5	341.63	360	1.09	0.77	5.35	4	0.45	754	4	15.23	4.9	2	61.12	1	5.49327	3.85587	2.79188	0.93404	107.934	5.22258	0	1	0	0	0	1	0	130	7.19	213	0	0
2	24	112	74	105	63	108.5	68.5	158	38	72	15.22	72	157.2	50	75.34	54.16	55.5	78.55	207	1.26	0.62	5.82	4	0.33	4.4	1	9.11	4.3	1	22.91	0	4.06622	0.886569	2.25892	1.40093	87.33	4.18184	0	0	0	0	0	0	0	98	6.5	226	0	0
1	30	120	73	117	64	118.5	68.5	166	61	81	22.14	60	175.57	82	74.92	49.15	28	85.32	328	1.23	0.71	5.25	3	0.36	180.6	2	18.28	5.8	3	27.83	0	4.54139	0.96298	2.82866	1.27134	109.356	4.15853	0	0	0	0	0	0	0	120	5.69	204	0	0
2	35	127	80	130	77	128.5	78.5	160	76.5	99	29.88	56	214.94	65	73.98	39.66	16.5	132	326	1.08	0.94	0.64	1	0.29	114.9	3	17.25	5	2	50.55	0	5.55975	1.48984	3.85101	1.02587	148.88	4.10635	0	1	0	0	0	0	0	143	5.39	263	0	0
1	38	150	95	150	95	150	95	175	68.5	93	22.37	59	307.4	63	91	67.99	218.9	136.92	395	1.81	1.31	3.98	2	0.15	88.3	1	17.35	4.9	2	89.66	1	7.95137	1.54537	5.48438	1.75867	212.026	5.05107	0	1	0	1	0	1	1	152	5.31	217	1	1
2	36	104	77	111	82	107.5	79.5	149	62.5	90	28.15	84	211.06	56	97.98	28.98	60	378.5	341	1.22	0.74	2.19	1	0.4	82.7	3	14.84	7.4	4	55.18	1	5.45939	4.27201	2.75168	0.749612	106.38	5.4385	0	1	0	0	0	0	0	154	8.97	230	0	0
1	42	119	77	121	81	120	79	170	62	80	21.45	60	202.26	74	87.32	39.66	478.9	210.28	296	1.15	0.93	3.61	2	0.4	224.3	3	16.49	5.3	3	64.99	1	5.23176	2.37336	3.11805	1.02587	120.544	4.8468	0	1	0	0	0	1	1	130	7.7	172	0	0
2	51	111	76	114	76	112.5	76	163	65	87	24.46	64	215.15	48	82.32	48.36	22.9	143.03	290	1.38	0.86	2.94	2	0.29	275.8	4	11.99	10.2	4	45.16	0	5.56518	1.61433	3.57434	1.25091	138.184	4.56927	0	0	0	0	0	0	0	120	8.5	245	0	0
1	29	112	71	112	67	112	69	170	64	82	22.15	77	148.81	92	80.13	37.82	134.4	101.9	350	1.04	0.62	5.51	4	0.29	224.3	3	20.25	5.2	2	29.69	0	3.8492	1.15011	2.34377	0.978272	90.61	4.44771	0	1	0	0	0	1	1	152	4.9	193	0	0
1	35	133	85	129	85	131	85	171	74.5	89	25.48	0	164.96	71	76.83	40.66	63.9	53.55	281	1.09	0.74	2.58	2	0.29	280.8	3	21.76	6.1	3	25.88	0	4.26694	0.604402	2.93818	1.05173	113.59	4.26454	0	0	0	0	0	1	1	150	7.89	205	0	0
2	51	146	76	129	74	137.5	75	156	44	73	18.08	78	170.23	56	81.03	56.24	55.5	83.84	228	1.32	0.71	5.8	4	0.68	13.7	2	12.78	4.8	1	29.23	0	4.40326	0.946275	2.5148	1.45473	97.222	4.49767	0	0	0	0	0	0	0	139	6.87	238	0	0
2	21	111	70	118	75	114.5	72.5	162	50	70	19.05	70	150.13	52	75.68	62.77	37.9	62.25	299	1.38	0.56	5.92	4	0.27	30.5	2	14.66	5.2	2	17.87	0	3.88334	0.702596	1.93766	1.62364	74.91	4.20071	0	0	0	0	0	0	0	154	5.24	284	0	0
1	18	124	67	118	60	121	63.5	184	66	76	19.49	68	154.36	70	88.67	44.34	170.8	56.05	401	1.13	0.67	5.12	3	0.19	112.3	1	15.23	4.6	1	25.72	0	3.99276	0.632619	2.55587	1.14692	98.81	4.92174	0	0	0	0	0	0	0	150	5.61	207	0	0
2	36	116	73	116	70	116	71.5	168	77.5	86	27.46	75	133.22	56	85.06	35.08	60	71.24	243	0.92	0.62	4.29	2	0.45	42.8	3	10.82	5.6	3	20.01	0	3.44594	0.804063	2.16999	0.907398	83.892	4.72136	0	1	0	0	0	0	0	150	8.63	248	0	0
2	36	150	96	160	100	155	98	151	93	108	40.79	84	133.42	48	91.38	37.41	227.2	83.28	347	1.01	0.59	0.02	1	0.94	4.9	1	19.84	5.7	3	21.21	0	3.45111	0.939955	2.05261	0.967667	79.354	5.07216	0	1	0	1	0	0	0	135	7.55	209	0	0
2	55	126	67	122	62	124	64.5	155	54	85	22.48	68	140.15	53	86.93	38.72	46.6	69.76	224	1.13	0.65	1.14	1	0.42	290.8	4	13.67	8	4	20.35	0	3.62519	0.787359	2.26275	1.00155	87.478	4.82516	0	1	0	0	0	0	0	125	6.63	181	0	0
1	28	119	68	124	74	121.5	71	177	64.5	74	20.59	65	126.36	75	83.01	38.72	25.4	58.45	262	1.1	0.58	4.61	3	0.24	223.1	3	24.06	6.6	4	19.59	0	3.26849	0.659707	1.96456	1.00155	75.95	4.60757	0	1	0	0	0	0	0	122	7.12	181	0	0
1	37	132	59	125	30	128.5	44.5	165	89	104	32.69	77	195.05	79	87.59	25.26	75.1	231.77	394	0.87	0.89	1.57	1	0.4	336.2	4	16.52	5.7	3	53.43	0	5.04527	2.61591	3.19286	0.653389	123.436	4.86179	0	1	0	0	0	0	0	125	6.53	244	0	0
1	56	126	76	126	76	126	76	167	59	83	21.16	79	154.36	52	114.57	47.77	62.3	77.17	298	1.21	0.71	1.09	1	0.52	115.9	1	16.81	5.5	3	25.81	0	3.99276	0.870993	2.35789	1.23564	91.156	6.35935	1	0	0	1	0	1	1	125	4.66	190	0	0
2	33	123	77	112	74	117.5	75.5	164	69	89	25.65	75	153.39	56	74.68	53.69	168	79.57	296	1.41	0.66	2.84	2	0.47	49.7	3	11.01	6	3	22.43	0	3.96767	0.898081	2.16725	1.38877	83.786	4.1452	0	0	0	0	0	0	0	159	7.9	187	0	0
2	59	140	80	135	70	137.5	75	148	38	60	17.35	68	185.06	59	85.51	68.8	106.4	77.54	267	1.55	0.7	4.37	2	0.76	123.2	4	18.84	5.3	2	23.05	0	4.78686	0.875169	2.6061	1.77962	100.752	4.74634	0	0	0	0	0	0	0	158	6.07	239	0	0
1	25	109	67	100	65	104.5	66	182	63.5	72	19.17	81	134.88	84	80.96	44.22	61.9	83.19	369	1.18	0.58	4.61	3	0.31	104.6	1	21.19	4.5	1	22.37	0	3.48888	0.938939	1.91469	1.14382	74.022	4.49378	0	0	0	0	0	0	0	120	5.71	253	0	0
1	28	123	81	123	75	123	78	175	85	97	27.76	76	201.7	83	78.95	34.3	22.9	318.19	510	1.17	0.9	2.09	1	0.35	217.3	3	21.26	6.6	4	58.43	1	5.21728	3.59131	2.68396	0.887222	103.762	4.38222	0	1	0	0	0	0	0	150	6.75	277	0	0
1	30	122	60	112	66	117	63	162	48	72	18.29	74	129.69	48	61.45	49.7	133.5	51.88	217	1.18	0.51	3.47	2	0.44	9.8	1	10.82	7.2	4	15.56	0	3.35463	0.585553	1.80067	1.28557	69.614	3.41086	0	0	0	0	0	0	0	136	7	262	0	0
1	31	117	64	114	65	115.5	64.5	178	60	75	18.94	58	169.82	75	66.31	41.88	149.6	66.05	315	1.1	0.82	5.7	4	0.36	102	1	16.6	4.5	1	35.29	0	4.39265	0.745485	2.96767	1.08329	114.73	3.68062	0	0	0	0	0	1	0	145	6.19	155	0	0
1	40	145	90	150	80	147.5	85	162	62.5	82	23.81	94	265.95	46	84.89	113.98	113.1	57.99	414	2.2	0.95	4.72	3	0.75	272.7	3	31.35	7.2	4	51.13	0	6.8792	0.654515	3.63094	2.94827	140.372	4.71192	0	1	0	1	0	1	1	150	5.26	187	1	0
2	33	118	84	118	80	118	82	162	59	73	22.48	80	174.95	57	74.19	44.08	67.7	96.24	331	1.06	0.78	5.32	3	0.62	10.3	1	14.45	4.5	1	34.91	0	4.52535	1.08623	2.88727	1.1402	111.622	4.11801	0	0	0	0	0	0	0	144	8.38	190	0	0
2	31	104	69	104	65	104	67	121	30.5	72	20.83	64	130.86	41	72.98	52.7	88.9	44.93	223	1.23	0.55	5.04	3	0.71	65.6	3	11.78	5.1	2	15.02	0	3.38489	0.507111	1.78929	1.36317	69.174	4.05084	0	0	0	0	0	0	0	155	7.7	213	0	0
2	58	145	78	140	80	142.5	79	157	66.5	95	26.98	60	167.87	56	78.98	34.32	30.2	145.35	341	1.07	0.77	0.33	1	0.58	279.6	4	16.05	5.2	2	44.5	0	4.34221	1.64052	2.70253	0.887739	104.48	4.38388	0	1	0	1	0	0	0	160	7.48	250	0	0
1	47	135	76	130	70	132.5	73	169	83	104	29.06	61	146.53	68	74.44	41.41	19.7	88.84	366	1.05	0.66	4.12	2	0.33	682.4	4	16.52	4.7	1	24.23	0	3.79022	1.00271	2.25949	1.07113	87.352	4.13188	0	0	0	0	0	0	0	140	6.23	263	0	0
2	44	121	71	121	70	121	70.5	160	48	76	18.75	61	178.07	60	74.44	70.76	53.3	69.11	257	1.43	0.66	5.33	3	0.51	29	2	14.04	4.5	1	22.55	0	4.60605	0.780023	2.41821	1.83032	93.488	4.13188	0	0	0	0	0	0	0	139	5.7	258	0	0
1	24	120	65	120	60	120	62.5	173	62	74	20.72	60	144.59	85	69.23	38.94	16.5	97.82	462	1.1	0.64	4.22	2	0.29	294	3	19.36	4.9	2	31.18	0	3.74004	1.10406	2.22675	1.00724	86.086	3.8427	0	1	0	0	0	0	0	140	7	240	0	0
1	33	123	69	123	60	123	64.5	167	60.5	77	21.69	58	181.53	66	76.45	55.64	86.9	63.74	399	1.32	0.76	4.97	3	0.34	156.1	2	18.98	5.5	3	29.34	0	4.69555	0.719413	2.92659	1.43921	113.142	4.24345	0	0	0	0	0	0	0	120	6.03	251	0	0
2	34	130	75	125	80	127.5	77.5	154	78.5	100	33.1	86	158.87	50	78.95	47.62	31.5	46.97	309	1.16	0.72	26.8	4	0.48	48.2	3	15.55	167.3	4	28.74	0	4.10942	0.530135	2.63466	1.23176	101.856	4.38222	0	0	1	0	1	0	0	160	7	200	0	0
1	30	104	56	100	55	102	55.5	175	61.5	78	20.08	65	133.98	65	62.91	36.05	55.5	71.61	354	0.95	0.6	2.07	1	0.27	204.1	3	20.18	4.6	1	22.11	0	3.4656	0.808239	2.16265	0.932488	83.608	3.4919	0	1	0	0	0	1	1	120	6.12	200	0	0
2	51	119	45	110	55	114.5	50	147	50	79	23.14	76	134.67	55	75.89	43.75	97.2	68.09	276	1.13	0.59	0.78	1	0.51	103	3	19.02	5.4	2	18.51	0	3.48345	0.76851	1.99953	1.13166	77.302	4.21237	0	0	0	0	0	0	0	150	8.4	296	0	0
2	48	123	70	120	65	121.5	67.5	163	56.5	74	21.27	69	175.36	55	72.42	56.59	31.8	85.78	179	1.28	0.66	5.82	4	0.49	20.6	2	16.42	4.3	1	26.73	0	4.53595	0.968172	2.6284	1.46379	101.614	4.01976	0	0	0	0	0	0	0	155	5.35	171	0	0
2	27	105	49	110	50	107.5	49.5	149	54.5	84	24.55	62	192.27	55	50.65	64.71	234.4	123.39	194	1.78	0.82	9.17	4	2.41	3.9	1	11.63	6.7	3	35.03	0	4.97336	1.39266	2.6612	1.67382	102.882	2.81139	0	0	0	0	0	0	0	128	9.29	266	0	0
2	25	108	68	110	65	109	66.5	164	44.5	73	16.55	82	109.31	52	64.26	42.56	301.9	46.42	199	0.96	0.49	26.21	4	0.71	25.5	2	15.95	90.8	4	13.9	0	2.82747	0.523928	1.48645	1.10088	57.466	3.56683	0	0	0	0	0	0	0	130	9	200	0	0
2	32	120	68	120	65	120	66.5	169	61	85	21.36	78	177.03	62	71.73	48.44	44	59.57	266	1.24	0.79	3.93	2	0.54	32.4	2	22.72	7.9	4	36.4	0	4.57915	0.672348	3.018	1.25297	116.676	3.98146	0	0	0	0	0	0	0	144	6.44	300	0	0
2	36	108	74	108	70	108	72	154	43.5	70	18.34	76	163.23	50	79.4	52.07	64.2	83.47	204	1.28	0.66	5.67	4	0.42	75.2	3	16.38	5.9	3	27.67	0	4.22219	0.942099	2.44351	1.34687	94.466	4.40719	0	0	0	0	0	0	0	155	7.89	289	0	0
2	50	124	66	120	65	122	65.5	149	44	70	19.82	68	166.77	58	74.16	61.31	102.3	68.74	178	1.44	0.68	5.67	4	0.69	3.9	1	12.94	5	2	26.32	0	4.31376	0.775847	2.37227	1.58588	91.712	4.11634	0	0	0	0	0	0	0	120	7.91	203	0	0
1	52	136	71	120	70	128	70.5	160	55.5	78	21.68	58	126.7	61	83.95	58.48	8.4	44.38	298	1.21	0.48	5.33	4	0.39	176.2	2	14.63	5.5	3	12.35	0	3.27729	0.500903	1.53502	1.51267	59.344	4.65975	0	0	0	0	0	0	0	112	5.41	269	0	0
2	28	118	80	118	80	118	80	157	47	82	19.07	76	163.58	73	90.48	76.57	82.5	40.76	339	1.63	0.58	1.92	1	0.26	24.1	2	23.01	9	4	14.48	0	4.23125	0.460045	2.03978	1.9806	78.858	5.0222	0	0	0	0	0	0	0	145	6.18	300	0	0
2	31	118	66	119	69	118.5	67.5	170	54.5	71	18.86	67	159.35	79	86.07	62.11	143.6	68.65	270	1.43	0.62	4.42	2	0.56	1	1	21.79	4.9	2	22.28	0	4.12183	0.774831	2.16011	1.60657	83.51	4.77742	0	0	0	0	0	0	0	142	8.21	166	0	0
1	32	103	54	101	59	102	56.5	174	56	65	18.5	61	128.65	82	69.5	44.1	221.5	40.3	356	1.03	0.57	4.92	3	0.01	95.4	1	17.68	4.4	1	17.76	0	3.32773	0.454853	1.97853	1.14071	76.49	3.85768	0	0	0	0	0	1	0	130	6.47	228	0	0
1	37	102	66	112	71	107	68.5	175	59	66	19.27	60	128.44	60	67.39	49.19	38.9	49.93	302	1.11	0.54	2.03	1	0.33	39.8	1	17.35	5.4	3	14.76	0	3.3223	0.563544	1.79162	1.27237	69.264	3.74056	0	0	0	0	0	1	0	120	6.4	212	0	0
2	32	119	82	130	78	124.5	80	163	83	98	31.24	66	182.99	53	88.12	48.04	163	103.38	347	1.24	0.77	1.27	1	0.5	29	2	14.01	6	3	35.47	0	4.73332	1.16682	2.95587	1.24263	114.274	4.89121	0	0	0	0	0	0	0	155	7.03	120	0	0
1	32	126	72	117	74	121.5	73	162	66.5	84	25.34	60	144.38	91	73.71	33.91	20	110.8	497	0.96	0.67	0.25	1	0.33	107.7	1	24.23	4.7	1	28.07	0	3.73461	1.25056	2.28427	0.877134	88.31	4.09136	0	1	0	0	0	0	0	120	9.4	294	0	0
2	28	114	63	124	66	119	64.5	166	65	82	23.59	61	207.59	46	72.94	77.22	24.1	103.66	202	1.89	0.84	3.06	2	0.69	32.4	2	11.54	7.9	4	35.64	0	5.36963	1.16998	2.83595	1.99741	109.638	4.04862	0	0	0	0	0	0	0	147	5	286	0	0
1	25	116	75	116	75	116	75	183	62	78	18.51	62	168.22	83	66.9	42.93	54.6	108.02	306	1.08	0.74	5.04	3	0.36	276.5	3	16.99	5.9	3	35.4	0	4.35127	1.21919	2.682	1.11045	103.686	3.71337	0	0	0	0	0	1	0	160	7.25	195	0	0
1	39	110	70	117	63	113.5	66.5	170	60.5	74	20.93	76	142.3	63	74.12	72.12	22.5	53.45	327	1.42	0.5	1.53	1	0.29	192.3	2	13.8	5.2	2	13.11	0	3.68081	0.603273	1.5388	1.86549	59.49	4.11412	0	0	0	0	0	1	1	120	6.05	297	0	0
2	35	140	72	130	79	135	75.5	156	57.5	78	23.63	60	193.04	67	89.71	57.12	30.2	115.33	267	1.41	0.75	4.95	3	0.64	65.1	3	13.47	5.1	2	33.31	0	4.99327	1.30169	2.91914	1.4775	112.854	4.97946	0	0	0	0	0	0	0	152	6.65	300	0	0
2	31	140	80	130	75	135	77.5	146	38	68	17.83	88	114.02	47	79.33	45.29	82.8	25.29	191	1.05	0.51	5.62	4	0.33	40.3	2	12.21	5	2	13.8	0	2.9493	0.28544	1.64697	1.1715	63.672	4.40331	0	0	0	0	0	0	0	120	7.79	269	0	0
1	46	127	67	128	65	127.5	66	167	58	75	20.8	58	157.48	60	87.46	51.49	12.6	65.5	334	1.29	0.71	4.09	2	0.28	171.3	2	15.69	4.7	1	24.13	0	4.07346	0.739278	2.40274	1.33187	92.89	4.85457	0	0	0	0	0	0	0	120	5.03	232	0	0
1	21	126	69	137	68	131.5	68.5	161	53.5	66	20.64	64	113.47	72	81.55	38.48	69.6	56.05	373	1	0.54	5.63	4	0.27	209.8	3	20.52	5.1	2	18.63	0	2.93508	0.632619	1.64977	0.995344	63.78	4.52653	0	1	0	0	0	0	0	120	7.73	236	0	0
1	49	122	79	124	78	123	78.5	164	71	87	26.4	68	179.38	77	86.9	49.27	224.9	88.28	410	1.21	0.76	4.93	3	0.39	235.4	3	17.71	5.1	2	34.92	0	4.63994	0.996388	2.90879	1.27444	112.454	4.82349	0	0	0	0	0	1	1	120	6.17	299	0	0
2	64	150	80	140	80	145	80	138	38	69	19.95	82	181.26	48	86.31	62.2	143.3	71.52	240	1.54	0.81	5.5	4	0.51	41.8	2	17.46	4.9	2	29	0	4.68857	0.807223	2.70967	1.6089	104.756	4.79074	1	0	0	1	0	0	0	160	6.48	287	0	0
2	32	105	72	102	67	103.5	69.5	157	47.5	78	19.27	68	110.83	41	80.06	51.59	218.6	34.84	231	1.13	0.43	3.62	2	0.4	28.5	2	9.87	4.7	1	9.45	0	2.86679	0.393228	1.3521	1.33445	52.272	4.44383	0	0	0	0	0	0	0	144	5.73	177	0	0
2	58	160	88	170	90	165	89	156	69.5	87	28.56	77	223.12	47	126.94	52.35	123.3	197.87	369	1.35	0.85	7.95	4	0.46	183.9	4	16.81	8.8	4	50.15	0	5.77134	2.2333	3.39359	1.35411	131.196	7.04596	1	0	0	1	1	0	0	120	5.37	245	0	0
2	41	160	88	150	90	155	89	153	48	76	20.5	76	149.99	54	79.61	52.47	223.8	46.32	246	1.16	0.64	5.6	4	0.3	7.4	1	12.05	4.9	2	22.87	0	3.87972	0.522799	2.28288	1.35722	88.256	4.41885	0	0	0	1	0	0	0	132	5.35	203	0	0
2	50	140	74	130	77	135	75.5	157	52.5	78	21.3	95	155.88	34	328.64	49.72	15.2	72.72	218	1.27	0.67	2.83	2	0.38	163.6	4	10.54	4.9	2	23.53	0	4.03207	0.820767	2.36979	1.28608	91.616	18.2416	0	0	0	0	1	0	0	143	7.22	190	0	0
1	29	117	68	134	68	125.5	68	174	81.5	90	26.92	52	172.73	83	100.72	42.48	35	163.68	466	1.13	0.75	3.67	2	0.36	230.1	3	15.34	5.6	3	45.13	0	4.46793	1.8474	2.52235	1.09881	97.514	5.59059	0	0	0	0	0	1	1	120	6.74	211	0	0
1	31	128	74	125	72	126.5	73	179	62.5	84	19.51	57	201.98	66	83.33	41.28	96.2	112.65	399	1.16	0.93	5.45	4	0.37	173.5	2	16.09	6.6	4	44.24	0	5.22452	1.27144	3.57398	1.06777	138.17	4.62533	0	0	0	0	0	0	0	120	5.87	200	0	0
1	26	124	80	124	80	124	80	171	68	77	23.26	65	127.12	70	83.95	37.38	148.9	57.43	294	1.02	0.62	2.11	1	0.36	185.6	2	12.94	12.4	4	26.76	0	3.28815	0.648194	2.02416	0.966891	78.254	4.65975	0	1	0	0	0	0	0	120	5.34	250	0	0
2	61	117	76	118	77	117.5	76.5	153	53.5	87	22.85	74	226.17	55	95.06	55.03	201.1	122.74	262	1.57	0.94	4.75	3	0.38	153.9	4	17.03	6.1	3	44.6	0	5.85023	1.38533	3.79183	1.42344	146.592	5.27642	0	0	0	0	0	0	0	152	4.12	237	0	0
2	38	111	53	111	53	111	53	167	54	77	19.36	66	133.98	47	89.16	50.68	336.2	56.88	240	1.18	0.58	5.09	3	0.47	2	1	10.29	4.7	1	16.59	0	3.4656	0.641986	1.86042	1.31092	71.924	4.94893	0	0	0	0	0	0	0	120	5.35	182	0	0
2	35	122	75	122	75	122	75	165	66.5	88	24.43	77	178.97	68	89.54	49.21	27	81.06	263	1.19	0.75	3.37	2	0.27	6.4	1	10.82	5.1	2	31.57	0	4.62933	0.914898	2.93709	1.27289	113.548	4.97003	0	0	0	0	0	0	0	145	8.33	210	0	0
2	61	160	88	166	85	163	86.5	162	64	92	24.39	81	282.38	54	201.9	45.44	152.1	374.15	336	1.38	1.16	7.19	4	0.66	298.4	4	16.96	6.9	3	76.76	1	7.30419	4.22291	4.19322	1.17538	162.11	11.2067	0	1	0	1	1	0	0	146	7.18	241	1	1
1	33	150	90	140	80	145	85	169	68.5	88	23.98	68	254.31	71	93.57	88.15	19.3	84.2	461	2.02	0.97	5.4	4	0.74	346.3	4	77.4	6.3	4	51.11	0	6.57812	0.950339	3.86239	2.28013	149.32	5.19372	0	1	0	1	0	0	1	150	6.24	217	1	0
1	28	129	64	125	65	127	64.5	169	65	73	22.76	85	145.28	72	88.25	43.62	56.8	354.14	407	1.32	0.47	4.95	3	0.53	326.9	4	21.19	4.7	1	24.14	0	3.75789	3.99707	0.797517	1.1283	30.832	4.89842	0	1	0	0	0	1	1	150	4	211	0	0
1	24	109	56	100	56	104.5	56	180	61	73	18.83	60	115.96	67	71.13	40.98	136.6	34.18	327	1.03	0.56	2.31	1	0.91	132.7	1	13.63	6	3	13.19	0	2.99948	0.385779	1.76265	1.06001	68.144	3.94816	0	0	0	0	0	0	0	140	6.21	227	0	0
1	35	122	80	120	80	121	80	171	63.5	80	21.72	95	179.79	66	86.52	32.96	331.8	293.46	293	1.03	0.76	5.58	4	0.53	111.3	1	19.33	4.4	1	40.93	0	4.65054	3.31219	2.27982	0.852561	88.138	4.8024	0	1	0	0	0	0	1	150	7.32	275	0	0
1	51	117	58	110	61	113.5	59.5	175	73	94	23.84	52	112.84	85	70.2	43.11	30.2	97.45	458	1.2	0.46	4.76	3	0.37	310.6	4	18.07	4.9	2	19.93	0	2.91878	1.09989	1.29953	1.11511	50.24	3.89654	0	0	0	0	0	1	1	140	6.38	261	0	0
2	50	113	53	113	54	113	53.5	163	68	88	93	68	157.41	55	72	50.98	159.6	52.43	238	1.21	0.63	3.82	2	0.77	6.4	1	12.91	5	2	20.53	0	4.07165	0.591761	2.48174	1.31868	95.944	3.99645	0	0	0	0	0	0	0	119	4	88	0	0
2	28	121	74	120	70	120.5	72	157	43.5	65	17.65	83	179.45	59	67.94	50.89	690	45.48	225	1.14	0.74	5.92	4	0.69	21.1	2	16.34	4.5	1	31.1	0	4.64175	0.513318	3.09012	1.31635	119.464	3.77109	0	0	0	0	0	0	0	146	4.66	200	0	0
2	27	106	60	110	60	108	60	162	55	70	20.96	71	145	59	71.1	52.9	105.2	72.72	228	1.24	0.56	5.7	4	0.36	2.5	1	12.68	4.6	1	19.59	0	3.75065	0.820767	2.0061	1.36834	77.556	3.94649	0	0	0	0	0	0	0	108	5.05	234	0	0
2	22	119	70	107	66	113	68	157	56	73	22.72	81	207.59	54	72.73	48.08	421	125.61	287	1.31	0.92	3.42	2	1.01	6.9	1	16.81	75.8	4	43.64	0	5.36963	1.41772	3.47615	1.24366	134.388	4.03697	0	0	0	0	0	0	0	142	6.58	200	0	0
2	24	111	69	102	70	106.5	69.5	158	47	67	18.83	78	179.66	52	78.71	69.46	60.3	43.17	234	1.4	0.67	5.86	4	0.4	61.7	3	13	6.8	3	25.74	0	4.64718	0.487246	2.62716	1.79669	101.566	4.36889	0	0	0	0	0	0	0	160	6.68	271	0	0
1	23	126	83	128	78	127	80.5	174	69	80	22.79	85	187.08	69	83.95	45.62	319	107.36	316	1.15	0.84	4.69	3	0.42	165.8	2	17.53	5.2	2	38.22	0	4.83911	1.21174	3.10367	1.18003	119.988	4.65975	0	0	0	0	0	0	0	140	4.93	115	0	0
1	47	141	85	144	83	142.5	84	177	84	94	26.81	87	228.39	71	120.69	28.66	162.1	452.14	284	0.91	0.92	3.42	2	0.47	326.3	4	19.67	5	2	58.21	1	5.90766	5.10316	2.82726	0.741335	109.302	6.69905	0	1	0	1	0	1	0	150	8.33	196	0	0
1	52	151	96	154	91	152.5	93.5	177	95	108	30.32	0	229.08	68	93.88	34.12	78	132.1	266	1.01	1.15	0.57	1	0.49	225.4	3	16.6	7.7	4	59.38	1	5.9255	1.49097	4.35954	0.882566	168.54	5.21092	0	1	0	1	0	0	0	150	6.82	218	0	1
2	44	155	95	158	89	156.5	92	160	70.5	90	27.54	69	203.92	52	92.63	37.39	118.9	160.17	300	1.11	0.96	4.64	3	0.36	183.4	4	11.63	8.2	4	51.28	0	5.2747	1.80779	3.47894	0.96715	134.496	5.14154	0	1	0	1	0	0	0	140	7.96	218	0	0
2	63	150	90	160	80	155	85	143	44.5	76	21.76	72	185.55	50	79.3	50.6	81.8	80.41	218	1.38	0.81	2.88	2	0.38	166.4	4	13.17	7.2	4	27.65	0	4.79953	0.907562	3.0747	1.30885	118.868	4.40164	0	0	0	1	0	0	0	155	3.83	229	0	0
1	29	132	75	130	79	131	77	178	76.5	85	24.14	65	144.59	77	62.6	39.13	56.8	43.36	317	0.94	0.71	5.39	4	0.23	86.2	1	12.46	4.5	1	26.61	0	3.74004	0.489391	2.50357	1.01216	96.788	3.47469	0	1	0	0	0	0	0	150	6.15	236	0	0
1	18	120	70	120	70	120	70	179	61	78	19.04	86	105.98	66	73.39	43.19	192.9	120.89	405	1.06	0.4	5.01	3	0.42	37.4	1	18.49	4.9	2	12.72	0	2.74133	1.36445	0.998758	1.11718	38.612	4.0736	0	0	0	0	0	0	0	150	8.3	277	0	0
1	21	108	58	108	58	108	58	173	60	75	20.05	78	137.31	72	57.98	28.49	154.9	154.24	464	0.97	0.62	6.55	4	0.27	126.9	1	16.6	10.8	4	35.04	0	3.55173	1.74086	2.01686	0.736937	77.972	3.21825	0	1	0	0	0	0	0	120	7.31	279	0	0
1	36	126	78	126	75	126	76.5	176	97	102	31.31	75	182.23	73	97.67	29.1	29.3	254.09	482	0.93	0.79	1.76	1	0.48	246.1	3	15.27	6.4	4	50.75	0	4.71366	2.86783	2.64646	0.752716	102.312	5.42129	0	1	0	0	0	0	0	120	7.09	249	0	0
2	60	145	80	140	80	142.5	80	154	58	84	24.46	68	225.82	57	91.35	33.75	62.6	244.18	321	1.09	1.04	0.19	1	0.63	237.7	4	14.66	5.4	2	63.53	1	5.84118	2.75598	3.70497	0.872995	143.234	5.07049	0	1	0	1	0	0	0	140	7.65	290	0	0
2	49	135	66	140	70	137.5	68	158	48	76	19.23	72	170.1	54	86.24	45.03	173	109.5	249	1.27	0.71	5.24	3	0.42	141.6	4	13.1	4.7	1	29.94	0	4.3999	1.23589	2.66865	1.16477	103.17	4.78686	0	0	0	0	0	0	0	120	7.59	294	0	0
1	56	159	83	143	84	151	83.5	161	68.5	92	26.43	72	181.19	59	94.23	39.28	103.2	244	411	1.26	0.72	7.15	4	0.62	395.8	4	21.19	7.6	4	37.84	0	4.68676	2.75395	2.40843	1.01604	93.11	5.23035	1	1	0	1	0	0	0	140	9.49	200	0	0
2	24	108	50	108	50	108	50	162	58.5	93	108	74	304.43	45	62.87	93	129.3	155.72	266	2.11	1.3	4.65	3	1.84	6.4	1	9.74	7.2	4	77.31	1	7.87455	1.75756	4.66337	2.40559	180.286	3.48968	0	1	0	0	0	0	0	101	8	258	1	1
2	28	116	74	116	70	116	72	150	62.5	89	27.78	74	121.16	45	84.51	39.31	16.8	59.48	209	1.05	0.54	4.1	2	0.42	4.9	1	10.05	10.4	4	21.91	0	3.13399	0.671332	1.80947	1.01681	69.954	4.69083	0	1	0	0	0	0	0	133	8.02	248	0	0
1	72	149	91	148	86	148.5	88.5	179	73.8	85	23.03	85	201.34	59	82.67	40.67	519	74.24	287	1.09	0.89	1.87	1	0.89	80.7	1	32.29	6.7	4	47.34	0	5.20797	0.837923	3.77191	1.05199	145.822	4.5887	1	0	0	1	0	0	0	114	4.98	205	0	0
2	81	188	94	195	99	191.5	96.5	161	56.1	65	21.64	88	196.35	47	91.69	37.02	124.9	193.74	312	1.18	0.87	5.09	3	0.51	193.4	4	17.14	6.5	3	56.02	1	5.07889	2.18668	3.11904	0.957579	120.582	5.08937	1	1	0	1	0	0	0	177	10.12	189	0	0
1	71	204	75	192	88	198	81.5	171	67.3	79	23.02	75	172.02	79	73.95	46	134.7	69.33	471	1.17	0.76	2.01	1	0.66	281.4	3	16.49	4.9	2	35.82	0	4.44956	0.782506	2.90103	1.18986	112.154	4.10468	1	0	0	1	0	0	0	193	8.35	205	0	0
2	60	100	62	98	62	99	62	156	73	80	30	75	188.66	58	79.23	29.82	18.1	156.87	345	1.04	0.86	4.91	3	0.71	351.7	4	15.59	6.8	3	54.55	1	4.87998	1.77054	3.2971	0.77134	127.466	4.39776	1	1	0	1	0	0	0	172	7.62	187	0	0
2	61	147	88	154	84	150.5	86	165	46	70	16.9	66	165.78	76	84.51	68.34	87.3	45.99	244	1.37	0.6	4.02	2	1.32	174	4	20.18	5.5	3	20.47	0	4.28815	0.519074	2.28251	1.76772	88.242	4.69083	1	0	0	1	0	0	0	160	5.47	223	0	0
2	54	162	91	156	92	159	91.5	152	56.4	75	24.41	82	122.67	60	79.96	46.24	102.3	71.92	192	1.13	0.49	11.76	4	0.35	237.1	4	17.28	8.7	4	18.03	0	3.17305	0.811738	1.60491	1.19607	62.046	4.43828	0	0	0	1	0	0	0	168	10.35	239	0	0
1	58	113	45	110	54	111.5	49.5	178	75.8	85	23.92	60	196.35	75	79.33	26.88	70	73.13	345	0.83	0.99	3.34	2	0.67	264.2	3	32.54	7.8	4	55.78	1	5.07889	0.825395	4.00528	0.695292	154.844	4.40331	0	1	0	0	0	0	0	173	8.06	261	0	0
2	45	121	70	124	77	122.5	73.5	156	44.5	60	18.29	65	142.08	65	63.47	54.27	443.3	41.08	319	1.27	0.59	5.24	3	0.55	42.3	3	14.73	4.9	2	25.41	0	3.67512	0.463657	2.05882	1.40378	79.594	3.52298	0	0	0	0	0	0	0	160	10.35	166	0	0
1	22	137	78	127	86	132	82	181	67.9	70	20.73	66	116.64	83	74.26	33.39	40.8	74.24	337	0.85	0.57	31.54	4	0.4	199.1	2	28.97	272.9	4	24.35	0	3.01707	0.837923	1.76932	0.863683	68.402	4.12189	0	1	0	0	0	0	0	172	10.9	196	0	0
1	59	175	77	165	71	170	74	168	55.5	70	19.66	55	196.49	63	75.55	54.48	811.3	71.56	324	1.34	0.83	4.34	3	0.49	173.5	2	19.6	5.2	2	44.84	0	5.08251	0.807675	3.3031	1.40921	127.698	4.19349	0	0	0	1	0	0	0	172	5.79	291	0	0
2	47	113	76	110	69	111.5	72.5	151	55.9	65	24.52	67	214.79	89	90.34	55.88	79.6	78.41	368	1.38	0.86	4.57	2	0.24	40.8	2	23.28	5.2	2	45.77	0	5.55587	0.884989	3.70481	1.44542	143.228	5.01443	0	0	0	0	0	0	0	159	6.39	233	0	0
2	35	121	79	125	81	123	80	159	41.8	65	16.53	75	129.04	68	72.49	46.12	29.9	46.92	231	1.11	0.55	5.12	3	0.45	7.9	1	13.97	4.8	1	17.25	0	3.33782	0.529571	1.90212	1.19296	73.536	4.02365	0	0	0	0	0	0	0	142	6.41	236	0	0
1	50	204	117	209	119	206.5	118	161	50	60	19.29	67	218.88	69	75.03	53.81	60	192.9	336	1.6	0.9	1.14	1	0.58	203.6	3	29.77	7	4	50.48	0	5.66167	2.1772	3.27186	1.39188	126.49	4.16463	1	0	0	1	0	0	0	190	6.33	179	0	0
1	33	121	74	115	70	118	72	179	62.7	70	19.57	63	124.68	63	62.91	41.88	223.2	42.47	228	1.05	0.56	5.39	4	0.63	164.7	2	18.98	4.4	1	19.5	0	3.22504	0.479345	1.92204	1.08329	74.306	3.4919	0	0	0	0	0	0	0	176	6.5	199	0	0
2	28	92	57	94	60	93	58.5	160	48.7	65	19.02	79	184.5	52	66.69	51.17	43.4	83.32	241	1.31	0.79	4.58	3	0.26	26	2	17.07	5.4	2	43.63	0	4.77237	0.940406	3.01774	1.32359	116.666	3.70171	0	0	0	0	0	0	0	172	6.33	273	0	0
2	33	109	63	103	58	106	60.5	157	55.1	65	22.35	61	134.38	51	66.87	61.12	37	57.94	305	1.53	0.5	4.54	2	0.38	65.6	3	15.41	6.8	3	16	0	3.47594	0.65395	1.59524	1.58096	61.672	3.7117	0	0	0	0	0	0	0	150	9.67	273	0	0
1	18	123	66	111	71	117	68.5	168	53.6	60	18.99	75	146.86	65	71.59	47.45	30.5	77.02	447	1.25	0.63	5.05	3	0.24	42.8	1	13.04	4.6	1	30.48	0	3.79876	0.8693	2.17294	1.22737	84.006	3.97369	0	0	0	0	0	0	0	174	7.87	242	0	0
2	52	0	0	0	0	0	0	157	45	65	18.26	0	158.16	64	71.52	66.05	21.3	69.7	301	1.62	0.63	4.2	2	0.26	47.3	3	15.62	5.1	2	25.08	0	4.09105	0.786682	2.02199	1.70848	78.17	3.9698	0	0	0	0	0	0	0	146	8.36	353	0	0
2	63	136	79	133	79	134.5	79	162	52	65	19.81	77	233.99	66	75.97	58.17	724.3	88.33	272	1.51	0.93	5	3	0.69	114.4	3	16.05	6.1	3	56.5	1	6.05251	0.996953	4.09089	1.50466	158.154	4.21681	1	0	0	1	0	0	0	164	5.31	139	0	0
2	47	113	72	114	71	113.5	71.5	168	53.6	65	18.99	83	175.21	66	77.7	58.21	514.1	75.17	222	1.37	0.68	5.35	3	0.47	3.4	1	22.39	4.6	1	36.16	0	4.53207	0.84842	2.63751	1.50569	101.966	4.31283	0	0	0	0	0	0	0	123	6.93	264	0	0
1	45	134	84	126	80	130	82	167	68.9	75	24.71	74	138.89	86	64.02	43.04	102	87.31	373	1.18	0.59	5.17	3	0.38	227.2	3	23.44	4.7	1	28.91	0	3.5926	0.98544	2.02763	1.1133	78.388	3.55351	0	0	0	0	0	0	0	178	5.51	252	0	0
1	51	143	75	103	73	123	74	185	59.1	75	17.27	107	248.96	79	72.15	50.97	142.6	101.66	295	1.44	0.99	2.67	2	2.84	1292.9	4	23.18	14	4	65.77	1	6.43973	1.1474	4.5954	1.31842	177.658	4.00477	0	1	0	0	0	0	0	166	6.89	189	1	1
1	38	105	73	100	60	102.5	66.5	159	55.9	65	22.11	77	200.79	70	72.01	36.79	42.1	106.67	263	1.11	0.95	3.19	2	0.22	562.1	4	16.2	4.3	1	61.96	1	5.19374	1.20395	3.69027	0.95163	142.666	3.997	0	1	0	0	0	0	0	184	8.02	176	0	0
2	41	119	70	112	63	115.5	66.5	169	64.9	70	22.72	67	178.88	62	79.3	68.69	75.7	55.72	319	1.51	0.67	12.51	4	0.47	12.3	2	12.46	11.1	4	28.23	0	4.627	0.628894	2.56198	1.77677	99.046	4.40164	0	0	0	0	0	0	0	149	12.03	219	0	0
2	36	100	63	97	68	98.5	65.5	159	52	70	20.57	69	143.05	61	73.22	48.4	0.4	37.47	247	1.12	0.58	5.68	4	0.83	2	1	13.47	4.6	1	19.68	0	3.70021	0.422912	2.25442	1.25194	87.156	4.06417	0	0	0	0	0	0	0	119	7.19	217	0	0
2	43	111	66	105	71	108	68.5	162	55	65	20.96	82	228.1	71	74.54	53.91	213.6	78.41	296	1.43	0.93	4.1	2	0.37	14.2	2	14.01	5.1	2	52.32	0	5.90016	0.884989	4.10005	1.39446	158.508	4.13743	1	0	0	1	0	0	0	159	6.8	221	0	0
2	58	221	149	246	144	233.5	146.5	160	63	70	24.61	93	187.69	59	82.7	51.28	13.2	245.34	322	1.33	0.75	1.22	1	0.69	186.7	4	15.19	8.4	4	38.58	0	4.85489	2.76907	2.25923	1.32644	87.342	4.59036	1	1	0	1	0	0	0	187	8.52	284	0	0
1	58	110	65	112	63	111	64	166	52.6	65	19.09	61	224.91	76	78.99	49.55	57.5	150.85	329	1.48	0.99	0.86	1	0.42	402.3	4	20.25	5.1	2	60.25	1	5.81764	1.7026	3.75556	1.28169	145.19	4.38444	0	0	0	0	0	0	0	183	10.61	160	0	0
1	38	128	82	125	75	126.5	78.5	170	77.6	85	26.85	55	187.48	81	84.4	33.55	31.8	162.52	357	1.01	0.85	1.57	1	0.17	220.2	3	16.92	5.6	3	53.15	0	4.84946	1.83431	3.14087	0.867822	121.426	4.68472	0	1	0	0	0	0	0	171	7.21	194	0	0
1	43	139	77	131	72	135	74.5	165	53	65	19.47	68	167.38	72	76.97	35.16	103.9	171.69	325	1.09	0.72	32.16	4	0.67	271.5	3	22.49	99.7	4	35.35	0	4.32954	1.93781	2.53187	0.909467	97.882	4.27231	0	1	0	0	0	0	0	188	7.54	186	0	0
2	53	174	98	172	91	173	94.5	162	47.8	69	18.21	87	213.47	55	76.17	34.76	58.4	145.2	245	1.17	0.95	3.79	2	0.36	208.1	4	12.94	4.8	1	61.78	1	5.52173	1.63883	3.87144	0.899121	149.67	4.22791	0	1	0	1	0	0	0	163	8.38	259	0	0
2	26	108	68	106	68	107	68	152	56	65	24.24	84	167.38	65	73.22	37.26	54.3	83.32	361	1.02	0.74	2.56	1	0.42	69.6	3	21.66	5.3	2	35.64	0	4.32954	0.940406	2.93471	0.963787	113.456	4.06417	0	1	0	0	0	0	0	162	11.16	275	0	0
2	63	128	63	125	59	126.5	61	152	57.7	65	24.97	91	262.61	72	77.22	32.77	597.3	178.09	291	1.26	1.21	0.06	1	0.65	205.3	4	26.92	5.6	3	83.59	1	6.79281	2.01005	5.02385	0.847646	194.222	4.28619	0	1	0	0	0	0	0	174	11.35	268	1	1
2	31	125	71	117	74	121	72.5	159	72.8	75	28.8	71	198.15	62	72.88	49.36	71.9	69.8	310	1.2	0.84	3.22	2	0.27	0.5	1	17.5	6.2	3	39.58	0	5.12545	0.78781	3.48758	1.27677	134.83	4.04529	0	0	0	0	0	0	0	139	5.76	244	0	0
2	57	119	83	116	76	117.5	79.5	167	69	75	24.74	73	150.4	72	84.06	46.09	534.9	54.7	285	1.1	0.66	21.84	4	0.55	231.9	4	20.12	32.1	4	28.55	0	3.89033	0.617381	2.41516	1.19219	93.37	4.66585	0	0	0	0	0	0	0	159	6.19	231	0	0
1	29	116	69	103	64	109.5	66.5	169	62	67	21.71	60	178.68	72	83.36	34.5	19.3	110.28	345	1.13	0.83	4.26	2	0.1	162	2	19.43	5.1	2	52.24	0	4.62183	1.2447	3.15892	0.892395	122.124	4.627	0	1	0	0	0	0	0	197	8.42	214	0	0
1	72	127	69	123	75	125	72	166	57.9	75	21.01	100	223.94	68	99.86	46.45	39.5	120.19	326	1.22	0.96	0.39	1	0.74	210.4	3	26.46	4.7	1	57.46	1	5.79255	1.35655	3.96927	1.2015	153.452	5.54285	0	0	0	0	0	0	0	189	6.73	234	0	0
2	44	134	86	134	81	134	83.5	158	51.7	65	20.71	85	192.12	76	80.34	50.93	341.2	77.95	318	1.26	0.84	1.64	1	0.13	46.3	3	15.73	10.5	4	47.28	0	4.96948	0.879797	3.24884	1.31738	125.6	4.45937	0	0	0	0	0	0	0	155	7.74	664	0	0
2	56	123	70	123	62	123	66	153	54	66	23.07	68	180.2	50	97.25	52.48	614.5	82.3	283	1.35	0.72	5.12	3	0.6	387.9	4	12.71	4.9	2	45.03	0	4.66115	0.928894	2.87791	1.35748	111.26	5.39798	0	0	0	0	0	0	0	168	6.78	279	0	0
1	44	129	81	128	80	128.5	80.5	159	51.5	65	20.37	63	219.78	83	74.47	63.1	670.5	90.92	343	1.61	0.87	5.16	3	0.16	581.3	4	20.79	4.6	1	59.66	1	5.68495	1.02619	3.58241	1.63218	138.496	4.13355	0	0	0	0	0	0	0	188	6.56	307	0	0
1	40	129	76	129	73	129	74.5	166	66.3	75	24.06	89	197.39	71	80.48	47.91	25.1	145.48	340	1.3	0.79	0.24	1	0.29	107.7	1	26.92	6.5	4	54.91	1	5.10579	1.64199	3.11392	1.23927	120.384	4.46714	0	0	0	0	0	0	0	171	10.51	308	0	0
2	56	124	69	125	68	124.5	68.5	162	65	75	24.77	100	178.4	63	77.18	42.62	62.9	79.25	327	1.09	0.79	2.36	1	0.78	126.4	4	20.79	7.7	4	36.17	0	4.61459	0.89447	3.10217	1.10243	119.93	4.28397	0	0	0	0	0	0	0	160	5.21	251	0	0
2	32	0	0	0	0	0	0	158	53	56	21.23	0	219.92	66	75.27	85.44	260.7	47.01	269	1.73	0.78	5.25	3	0.29	27.5	2	16.52	7.9	4	40.04	0	5.68857	0.530587	3.23533	2.21004	125.078	4.17795	0	0	0	0	0	0	0	155	10.13	246	0	0
2	31	121	72	116	71	118.5	71.5	159	53.6	65	21.2	85	131.96	60	88.12	61.85	30.2	60.45	235	1.36	0.47	5.56	4	0.22	75.7	3	13.6	4.8	1	15.47	0	3.41335	0.68228	1.50078	1.59984	58.02	4.89121	0	0	0	0	0	0	0	154	8.28	327	0	0
2	43	165	80	158	81	161.5	80.5	164	70.5	80	26.21	73	158.78	57	93.12	35.6	137.3	201.89	221	1.16	0.67	3.82	2	0.42	10.8	1	14.07	6.3	3	40.59	0	4.10709	2.27867	2.1418	0.920848	82.802	5.16874	0	1	0	1	0	0	0	128	7.51	208	0	0
1	57	164	93	163	87	163.5	90	167	65.7	80	23.56	81	208.9	56	79.93	42.48	249.4	84.34	299	1.17	1.02	2.43	1	0.39	249.6	3	21.69	4.9	2	56.34	1	5.40352	0.951919	3.86839	1.09881	149.552	4.43661	0	0	0	1	0	0	0	189	8.57	201	0	0
1	33	113	69	111	66	112	67.5	170	69.6	75	24.08	64	165.23	90	69.4	52.79	14.9	47.38	278	1.31	0.72	3.74	2	0.2	142.2	2	18.56	9	4	32.24	0	4.27393	0.534763	2.66332	1.36549	102.964	3.85213	0	0	0	0	0	0	0	172	6.58	172	0	0
2	32	133	73	133	72	133	72.5	154	42	60	17.71	55	138.06	61	74.06	49.94	8.8	54.14	296	1.14	0.58	4.99	3	0.57	1.5	1	16.92	4.8	1	20.83	0	3.57113	0.611061	1.99928	1.29177	77.292	4.11079	0	0	0	0	0	0	0	132	6.87	259	0	0
2	46	126	79	120	70	123	74.5	158	66.5	70	26.64	64	182.56	51	75.52	54.27	50.7	60.72	327	1.27	0.78	3.96	2	0.49	42.8	3	17.75	5.3	2	35.27	0	4.72219	0.685327	3.00429	1.40378	116.146	4.19183	0	0	0	0	0	0	0	163	6.96	276	0	0
2	41	119	76	127	70	123	73	165	48.5	70	17.81	82	154.83	64	69.2	69.62	240.3	48.4	283	1.49	0.56	3.47	2	0.48	2.9	1	15.55	5.1	2	22.96	0	4.00491	0.546275	1.9537	1.80083	75.53	3.84103	0	0	0	0	0	0	0	119	7.73	299	0	0
2	57	153	82	146	90	149.5	86	161	40	65	15.43	91	174.59	57	82.04	68.11	37.3	67.21	295	1.56	0.64	3.89	2	0.17	142.7	4	16.7	5.6	3	31.04	0	4.51604	0.758578	2.40657	1.76177	93.038	4.55373	0	0	0	1	0	0	0	155	7.73	268	0	0
1	46	111	65	108	68	109.5	66.5	162	66.7	75	25.42	61	147.62	82	73.12	48.28	477.4	130.29	368	1.31	0.62	2.42	1	0.23	637.7	4	20.15	5.3	3	33.02	0	3.81842	1.47054	1.89555	1.24884	73.282	4.05861	0	0	0	0	0	0	0	183	9.16	217	0	0
2	46	165	91	156	89	160.5	90	157	70.9	80	28.76	88	192.54	52	98.15	43.95	167.1	96.2	276	1.14	0.86	3.59	2	0.65	173.5	4	16.31	8.3	4	51.23	0	4.98034	1.08578	3.34584	1.13683	129.35	5.44794	0	0	0	1	0	0	0	174	5.75	191	0	0
2	48	134	82	125	79	129.5	80.5	150	54	65	24	75	229.28	66	92.25	53.65	690.3	115.28	278	1.49	1.03	10.81	4	0.16	14.7	2	14.18	8.7	4	67.9	1	5.93068	1.30113	3.94656	1.38774	152.574	5.12045	0	0	0	0	0	0	0	152	8.51	382	0	0
2	77	143	87	141	85	142	86	159	43.4	60	17.17	90	128.42	69	75.03	46.97	32.2	70.73	301	1.09	0.54	3.35	2	0.42	98.4	3	24.91	10.4	4	19.2	0	3.32178	0.798307	1.74092	1.21495	67.304	4.16463	0	0	0	1	0	0	0	153	8.83	228	0	0
2	50	126	66	126	71	126	68.5	170	74.3	75	25.71	62	105.97	59	83.22	41.76	25.4	44.7	219	1.01	0.44	5.52	4	0.31	8.8	1	12.52	4.2	1	13.46	0	2.74108	0.504515	1.42964	1.08019	55.27	4.61923	0	0	0	0	0	0	0	92	2.91	257	0	0
2	45	118	59	113	63	115.5	61	160	58.5	70	22.85	63	208.41	66	81.49	48.89	82.5	93.42	332	1.29	0.86	3.31	2	0.15	24.1	2	13.7	11.4	4	46.8	0	5.39084	1.0544	3.64294	1.26461	140.836	4.5232	0	0	0	0	0	0	0	157	8.51	370	0	0
1	32	132	66	124	72	128	69	176	79.9	85	25.79	74	195.11	86	68.81	53.3	12.6	128.62	505	1.51	0.84	5.09	3	0.2	156.1	2	24.36	4.8	2	52.17	0	5.04682	1.45169	3.00274	1.37869	116.086	3.81938	0	0	0	0	0	0	0	212	6.37	185	0	0
1	34	121	65	114	64	117.5	64.5	172	64.9	65	21.94	75	181.52	75	75.2	34.17	61	145.29	222	1.08	0.85	2.36	1	0.04	263.5	3	17.32	5.2	2	53.04	0	4.69529	1.63984	3.0598	0.883859	118.292	4.17407	0	1	0	0	0	0	0	184	8.53	245	0	0
2	32	122	71	115	72	118.5	71.5	159	46.9	65	18.55	68	113.52	58	55.72	37.76	43.4	60.54	188	0.99	0.54	5.74	4	0.31	4.9	1	15.34	4.8	1	21.68	0	2.93637	0.683296	1.64646	0.97672	63.652	3.09281	0	1	0	0	0	0	0	142	6.99	264	0	0
2	33	102	62	100	62	101	62	156	52	60	21.37	76	134.66	50	66.38	32.33	282.5	56.55	230	0.88	0.66	5.22	3	0.29	9.3	1	12.12	23.4	4	30.96	0	3.48319	0.638262	2.35437	0.836265	91.02	3.6845	0	1	0	0	0	0	0	140	5.64	285	0	0
1	66	137	88	146	93	141.5	90.5	168	62.8	75	22.25	83	196.08	77	76.18	39.73	432.2	111.02	384	1.15	0.9	2.86	2	0.44	109.7	1	24.46	5.4	3	53.22	0	5.07191	1.25305	3.46989	1.02768	134.146	4.22846	0	1	0	1	0	0	0	193	8.27	192	0	0
1	34	105	51	98	64	101.5	57.5	173	67.2	70	22.45	60	176.46	81	69.72	40.04	255.6	91.29	293	1.03	0.82	0.92	1	0.5	349	4	63.74	6	3	40.43	0	4.56441	1.03036	3.05644	1.0357	118.162	3.86989	0	0	0	0	0	0	0	159	10.42	266	0	0
2	35	123	60	116	68	119.5	64	165	48	65	17.63	72	166.89	60	70.86	51.39	22.9	51.09	251	1.18	0.67	4.52	2	0.32	3.4	1	12.4	7.2	4	31.26	0	4.31686	0.576637	2.72328	1.32928	105.282	3.93317	0	0	0	0	0	0	0	107	6.28	377	0	0
2	18	98	57	102	60	100	58.5	156	43.4	56	17.83	81	121.84	87	75.38	46.78	96.2	53.77	218	1.07	0.52	15.21	4	0.4	42.3	3	40.65	43.4	4	16.13	0	3.15158	0.606885	1.66337	1.21004	64.306	4.18406	0	0	0	0	0	0	0	145	4.91	201	0	0
1	27	124	53	98	53	111	53	184	61.7	70	18.22	69	127.66	86	73.26	45.28	22.2	116.3	386	1.22	0.4	4.13	2	0.31	125.3	1	21.63	4.8	2	22.47	0	3.30212	1.31264	1.52923	1.17124	59.12	4.06639	0	0	0	0	0	0	0	167	7.42	223	0	0
1	46	124	72	119	71	121.5	71.5	172	67.7	80	22.88	66	154.07	68	78.92	36.96	275.5	65.45	263	0.97	0.72	4.29	3	0.25	119.6	1	17.14	5	2	31.29	0	3.98526	0.738713	2.69064	0.956027	104.02	4.38055	0	1	0	0	0	0	0	177	6.59	295	0	0
2	38	111	75	125	71	118	73	163	51.6	65	19.42	73	148.18	54	77.6	36.5	73.2	106.39	193	1	0.69	0.7	1	0.69	10.3	1	13.27	5.2	2	39.11	0	3.8329	1.20079	2.33839	0.944128	90.402	4.30728	1	1	0	1	0	0	0	114	4.83	272	0	0
1	65	111	71	113	62	112	66.5	177	63	87	20.11	68	168	58	82.77	53.03	55.9	76.28	248	1.23	0.71	1.56	1	0.8	516.7	4	19.6	7.3	4	28.8	0	4.34558	0.860948	2.57926	1.3717	99.714	4.59425	0	0	0	0	0	0	0	191	5.14	238	0	0
2	61	135	81	134	76	134.5	78.5	142	39	62	19.34	64	211.39	95	79.85	28.74	126.2	278.96	396	1.08	1.02	4.91	3	1.37	70.6	3	23.08	5.1	2	61.36	1	5.46793	3.14853	3.28138	0.743404	126.858	4.43217	0	1	0	0	0	0	0	132	5.02	50	0	0
2	34	124	68	108	61	116	64.5	158	48	78	19.23	59	153.37	64	75.83	57.92	279.5	47.38	132	1.25	0.63	5.5	4	0.33	18.7	2	13.47	4.9	2	22.7	0	3.96715	0.534763	2.22385	1.49819	85.974	4.20904	0	0	0	0	0	0	0	153	6.41	169	0	0
2	57	161	83	155	88	158	85.5	142	53	76	26.28	84	186.65	60	93.29	49.24	737.4	98.33	281	1.3	0.81	3.78	2	0.58	188.4	4	14.98	5.4	2	40.75	0	4.82799	1.10982	3.04563	1.27367	117.744	5.17817	1	0	0	1	0	0	0	173	6.39	383	0	0
2	56	158	135	138	87	148	111	162	51	76	19.43	63	160.65	55	81.03	66.19	59.1	60.35	287	1.53	0.63	2.96	2	0.39	270.9	4	14.84	6.3	3	21.4	0	4.15546	0.681151	2.13114	1.71211	82.39	4.49767	0	0	0	1	0	0	0	158	5.68	196	0	0
2	27	111	69	109	66	110	67.5	153	44	72	18.8	84	166.61	52	74.65	54.83	70	52.2	240	1.2	0.68	3.53	2	0.28	80.7	3	11.66	6.8	3	28.54	0	4.30962	0.589165	2.62131	1.41826	101.34	4.14354	0	0	0	0	0	0	0	147	12.26	197	0	0
2	26	111	57	109	65	110	61	158	55	80	22.03	92	156.84	60	85.9	67.79	43.7	49.32	261	1.46	0.61	2.68	1	0.03	75.2	3	14.01	11.8	4	20.36	0	4.05691	0.556659	2.04827	1.75349	79.186	4.76798	0	0	0	0	0	0	0	155	5.31	233	0	0
1	18	116	39	121	51	118.5	45	181	53	168	16.18	95	125.72	75	65.72	45.63	31.8	70.35	342	1.13	0.53	4.42	3	0.29	448.8	4	15.37	4.5	1	20.94	0	3.25194	0.794018	1.70771	1.18029	66.02	3.64787	0	0	0	0	0	0	0	180	8.59	210	0	0
1	55	196	114	180	113	188	113.5	166	72	87	26.13	59	165.16	82	96.17	52.58	44.6	64.61	296	1.22	0.7	2.39	1	0.37	92.3	1	21.19	6.5	4	31.46	0	4.27212	0.729233	2.57781	1.36006	99.658	5.33803	1	0	0	1	0	0	0	161	5.51	224	0	0
2	43	151	67	140	70	145.5	68.5	165	56	78	20.57	53	207.79	60	81.35	42.08	71.6	80.36	295	1.15	0.92	5.21	3	0.48	133.7	4	17.89	4.8	1	53.27	0	5.37481	0.906998	3.87062	1.08846	149.638	4.51543	0	0	0	1	0	0	0	163	6.19	293	0	0
2	64	119	67	109	62	114	64.5	151	49	78	21.49	78	185.19	71	92.56	55.14	104.5	108.98	409	1.47	0.79	3.61	2	0.21	360.6	4	22.52	5.5	3	35.9	0	4.79022	1.23002	2.80016	1.42628	108.254	5.13766	0	0	0	0	0	0	0	164	8.98	237	0	0
1	38	184	119	186	119	185	119	178	87	186	27.46	82	148.94	84	89.26	33.94	74.1	78.04	346	0.96	0.68	4.01	2	0.44	179.5	2	21.19	7.5	4	29.79	0	3.85256	0.880813	2.57093	0.87791	99.392	4.95448	1	1	0	1	0	0	0	180	6.64	140	0	0
2	37	152	80	138	82	145	81	149	60	85	27.03	64	170.98	47	108.15	37.44	21.9	138.35	370	1.09	0.79	1.6	1	0.2	105.1	3	15.37	5	2	46.84	0	4.42266	1.56151	2.73849	0.968443	105.87	6.003	0	1	0	1	0	0	0	167	8.25	251	0	0
2	60	131	63	116	68	123.5	65.5	152	58	85	25.1	81	186.51	49	112.91	68.45	415.9	69.8	294	1.73	0.76	3.39	2	0.51	166.4	4	12.78	12.2	4	35.66	0	4.82437	0.78781	2.69271	1.77056	104.1	6.26721	0	0	0	0	0	0	0	162	8.63	248	0	0
2	43	135	82	122	87	128.5	84.5	160	92	104	35.94	73	166.27	49	76.56	33.06	42.4	136.31	211	1.03	0.71	4.55	2	0.26	9.3	1	10.24	6.3	3	38.49	0	4.30083	1.53849	2.74051	0.855147	105.948	4.24956	0	1	0	0	0	0	0	130	9.79	381	0	0
1	43	131	90	137	86	134	88	179	69	176	21.53	85	198.08	65	83.22	47.83	213	162.34	344	1.27	0.89	2.58	2	0.13	270.3	3	18.74	5.4	3	60.56	1	5.12364	1.83228	3.04661	1.2372	117.782	4.61923	0	0	0	0	0	0	0	199	5.63	239	0	0
2	42	141	78	130	74	135.5	76	154	53	72	22.35	85	221.03	65	82.77	32.98	950.5	155.76	493	1.03	1.05	1.57	1	0.56	287.1	4	21.63	10.3	4	69.41	1	5.71728	1.75801	4.05841	0.853078	156.898	4.59425	0	1	0	0	0	0	0	163	8.21	304	0	0
2	22	119	97	115	95	117	96	157	41	68	16.63	97	113.73	71	91.24	51.67	158.3	50.99	375	1.13	0.46	5.56	4	0.25	115.9	3	21.66	6.3	3	13.65	0	2.9418	0.575508	1.34149	1.33652	51.862	5.06439	0	0	0	1	0	0	0	154	6.88	254	0	0
2	50	152	89	159	96	155.5	92.5	162	50	69	19.05	70	232.46	57	90.1	74.02	90.5	71.1	286	1.87	0.88	4.38	2	0.29	120.1	4	19.74	5.7	3	45.35	0	6.01293	0.802483	3.73047	1.91464	144.22	5.00111	0	0	0	1	0	0	0	157	6.36	320	0	0
2	54	117	69	108	69	112.5	69	154	58	76	24.46	65	255.96	62	94.58	48.79	82.1	137.23	287	1.49	1.16	5.25	3	0.02	317.8	4	14.49	5.4	2	79.28	1	6.6208	1.54887	4.64884	1.26203	179.724	5.24978	0	1	0	0	0	0	0	168	6.76	208	1	1
2	79	138	67	129	65	133.5	66	145	65	78	30.92	71	226.85	67	74.86	42.56	117.3	105.74	303	1.16	1.09	0.03	1	1.04	216.7	4	23.57	5.9	3	62.65	1	5.86782	1.19345	4.21992	1.10088	163.142	4.1552	0	1	0	0	0	0	0	166	4.72	198	0	1
2	70	153	81	163	97	158	89	145	40	66	19.02	92	229.14	54	81.97	69.48	86	95.46	297	1.67	0.91	5.15	3	1.91	153.4	4	21.69	28.9	4	50.07	0	5.92706	1.07743	3.63601	1.79721	140.568	4.54984	1	0	0	1	0	0	0	182	8.53	361	0	0
2	43	126	78	115	78	120.5	78	156	50	78	20.55	73	151.57	61	89.58	55.11	44.6	76.84	304	1.31	0.6	5.44	4	0.17	29	2	12.84	5	2	26.19	0	3.92059	0.867269	2.09757	1.4255	81.092	4.97225	0	0	0	0	0	0	0	162	8.08	255	0	0
1	27	131	93	135	98	133	95.5	172	63	78	21.3	71	157.46	82	82.53	26.78	43	260.07	457	1.07	0.66	5.13	3	0.2	159.9	2	19.02	4.9	2	49.29	0	4.07294	2.93533	2.03482	0.692706	78.666	4.58093	0	1	0	1	0	0	0	175	5.65	157	0	0
1	26	122	82	116	85	119	83.5	169	67	78	23.46	73	173.41	72	101.45	56.1	410	139.37	450	1.56	0.78	4.69	3	0.24	417.7	4	16.67	5.4	3	45.87	0	4.48551	1.57302	2.3134	1.45111	89.436	5.63111	0	0	0	0	0	0	0	179	6.31	262	0	0
2	32	0	0	0	0	0	0	168	51	68	18.4	0	137.16	62	71.14	60.02	70	52.75	288	1.42	0.48	4.09	2	0.22	39.8	2	14.11	6	3	17.23	0	3.54785	0.595372	1.72245	1.55251	66.59	3.94871	0	0	0	0	0	0	0	152	7.09	251	0	0
2	50	143	66	133	68	138	67	148	44	73	20.09	118	198.57	60	87.53	72.85	415.5	53.22	170	1.5	0.73	5.36	3	1.78	272.7	4	15.8	5.6	3	31.23	0	5.13632	0.600677	2.97662	1.88438	115.076	4.85846	0	0	0	0	0	0	0	144	5.63	191	0	0
2	52	0	0	0	0	0	0	160	49	67	19.14	0	136.39	55	97.84	37.29	216.5	119.82	269	1.09	0.57	4.83	3	0.33	107.2	3	14.52	5.2	2	27.41	0	3.52794	1.35237	1.94351	0.964563	75.136	5.43073	0	1	0	0	0	0	0	171	4.74	221	0	0
2	30	106	64	109	65	107.5	64.5	155	56	72	23.6	79	182.83	57	81.63	72.44	63.2	51.18	329	1.57	0.72	0.93	1	0.21	51.2	3	11.19	5.4	2	28.9	0	4.72918	0.577652	2.59064	1.87377	100.154	4.53097	0	0	0	0	0	0	0	148	8.58	311	0	0
1	26	112	70	104	64	108	67	187	64	74	18.3	51	157.95	82	85.76	45.76	52	88.7	293	1.19	0.67	5.7	4	0.19	182.8	2	18.21	4.3	1	32.51	0	4.08562	1.00113	2.44309	1.18365	94.45	4.76021	0	0	0	0	0	0	0	174	6.63	261	0	0
1	57	105	75	104	70	104.5	72.5	180	71	76	21.91	75	184.43	79	104.44	68.22	124.3	53.96	328	1.55	0.71	4.52	3	0.4	192.9	2	18.07	5.7	3	30.74	0	4.77056	0.609029	2.7268	1.76461	105.418	5.79707	0	0	0	0	0	0	0	179	5.04	180	0	0
1	31	130	63	132	64	131	63.5	157	50	174	20.28	73	142.29	71	90.79	31.85	479.9	146.13	440	1.05	0.68	5.72	4	0.4	251.4	3	16.38	5	2	38.56	0	3.68055	1.64932	2.10072	0.823849	81.214	5.03941	0	1	0	0	0	0	0	191	7.67	304	0	0
2	58	165	91	165	87	165	89	0	0	0	20	77	179.65	54	93.02	54.52	150.5	74.34	312	1.31	0.76	3.69	2	0.42	125.3	4	15.91	8.3	4	32.92	0	4.64692	0.839052	2.8521	1.41024	110.262	5.16319	0	0	0	1	0	0	0	151	6.24	281	0	0
2	26	91	50	80	54	85.5	52	168	47	164	16.65	76	130.02	58	81.73	45.59	96.2	51.55	197	1.13	0.54	5.76	4	0.24	64.6	3	14.49	4.5	1	19.88	0	3.36317	0.581828	1.91723	1.17926	74.12	4.53652	0	0	0	0	0	0	0	154	6.23	204	0	0
1	30	99	74	100	59	99.5	66.5	168	67	176	23.74	54	165.09	77	80.27	37.75	186.8	100.18	335	1.05	0.73	2.26	1	0.3	112.3	1	17.5	5.1	2	38.77	0	4.27031	1.1307	2.77558	0.976461	107.304	4.45548	0	1	0	0	0	0	0	175	6.93	288	0	0
1	41	114	68	110	65	112	66.5	172	70	85	23.66	73	230.8	70	80.65	36.35	72.2	273.68	357	1.15	1.05	2.36	1	0.26	288.3	3	19.81	6.5	4	75.1	1	5.96999	3.08894	3.61392	0.940248	139.714	4.47658	0	1	0	0	0	0	0	190	5.84	215	0	0
1	37	125	74	124	70	124.5	72	160	65	85	25.39	57	213.06	89	86.59	55.51	54.3	116.3	360	1.37	0.9	4.12	2	0.32	300.3	3	19.78	6.4	4	53.33	0	5.51112	1.31264	3.47362	1.43585	134.29	4.80628	0	0	0	0	0	0	0	170	7.59	207	0	0
2	33	103	62	106	60	104.5	61	168	65	78	23.03	66	133.41	64	74.82	52.19	27.7	57.76	292	1.19	0.52	2.2	1	0.15	14.7	2	17.75	5.4	2	19.86	0	3.45085	0.651919	1.80207	1.34997	69.668	4.15298	0	0	0	0	0	0	0	158	8.66	161	0	0
1	23	109	51	92	43	100.5	47	175	58	80	18.94	59	116.3	85	85.34	43.43	23.8	77.49	375	1.11	0.48	5.59	4	0.16	261.1	3	14.91	6.3	4	20.36	0	3.00828	0.874605	1.48401	1.12338	57.372	4.7369	0	0	0	0	0	0	0	172	5.13	193	0	0
2	24	120	69	120	76	120	72.5	152	44	65	19.04	87	116.5	53	79.47	52.11	29.9	42.57	250	1.14	0.49	4.58	3	0.22	12.3	2	7.81	5.1	2	15.45	0	3.01345	0.480474	1.44532	1.3479	55.876	4.41108	0	0	0	0	0	0	0	159	7.83	280	0	0
1	28	110	52	102	51	106	51.5	172	55	82	18.59	62	133.62	81	70.62	46.74	47.2	47.29	302	1.16	0.56	4.58	3	0.15	93.9	1	16.92	4.6	1	21.96	0	3.45629	0.533747	2.00264	1.209	77.422	3.91985	0	0	0	0	0	0	0	168	7.42	276	0	0
1	31	121	67	112	79	116.5	73	170	55	76	19.03	59	101.81	78	91.11	33.81	26.7	84.16	248	1	0.48	5.28	3	0.16	308	4	15.23	4.3	1	19.76	0	2.63347	0.949887	1.32354	0.874547	51.168	5.05717	0	1	0	0	0	0	0	175	6.2	233	0	0
2	33	131	90	131	86	131	88	151	43	70	18.86	72	171.47	62	73.02	67.91	571.6	40.53	245	1.43	0.62	2.83	2	0.35	22.1	2	14.49	6.4	3	31.08	0	4.43533	0.457449	2.46906	1.7566	95.454	4.05306	0	0	0	0	0	0	0	142	5.82	247	0	0
2	56	143	72	140	73	141.5	72.5	154	56	76	23.61	81	185.95	61	92.77	39.79	324	112.69	246	1.16	0.82	2.34	1	0.65	137.4	4	14.91	6	3	43.52	0	4.80988	1.2719	3.19767	1.02923	123.622	5.14931	1	1	0	1	0	0	0	162	5.02	211	0	0
1	33	116	75	106	74	111	74.5	171	77	86	26.33	96	206.19	85	94.27	28.55	171.7	145.94	430	0.92	1.04	1.61	1	0.22	324.3	4	21.06	4.8	2	63.64	1	5.33342	1.64718	3.83994	0.738489	148.452	5.23257	0	1	0	0	0	0	0	182	5.75	219	0	0
2	22	120	64	124	58	122	61	158	43	70	17.22	90	145.54	70	81.87	56	48.5	48.5	285	1.22	0.57	4.33	2	0.2	13.3	2	13.5	5.3	2	22.25	0	3.76461	0.547404	2.06518	1.44853	79.84	4.54429	0	0	0	0	0	0	0	150	5.65	260	0	0
1	59	125	69	117	68	121	68.5	170	54	78	18.69	66	146.79	61	94.06	53.02	18.4	49.98	325	1.22	0.66	0.9	1	0.54	60.7	1	21.36	4.7	1	26.07	0	3.79695	0.564108	2.16694	1.37144	83.774	5.22091	0	0	0	0	0	0	0	179	6.85	137	0	0
2	42	165	104	173	105	169	104.5	161	61	78	23.53	91	152.75	55	97.53	53.05	378.4	47.29	189	1.2	0.67	5.88	4	0.29	7.9	1	16.49	4.7	1	30.32	0	3.95111	0.533747	2.33425	1.37222	90.242	5.41352	1	0	0	1	0	0	0	125	6.83	333	0	0
2	49	125	75	122	70	123.5	72.5	155	59	78	24.56	78	193.51	69	93.09	38.58	32.2	233.48	361	1.2	0.81	2.15	1	0.49	171.3	4	18.81	7.8	4	58.55	1	5.00543	2.63521	2.79964	0.997931	108.234	5.16707	0	1	0	0	0	0	0	169	8.39	251	0	0
1	19	125	58	110	49	117.5	53.5	177	59	78	18.83	51	152.13	78	86.91	43.07	37.3	127.97	461	1.16	0.63	5.36	4	0.22	62.2	1	15.48	4.5	1	37.48	0	3.93508	1.44436	2.15898	1.11407	83.466	4.82405	0	0	0	0	0	0	0	162	4.79	169	0	0
1	31	103	59	104	54	103.5	56.5	170	62	78	21.45	80	149.08	87	101.21	58.18	93.7	69.62	316	1.26	0.63	1.32	1	0.08	193.4	2	16.67	23.5	4	24.46	0	3.85618	0.785779	1.9911	1.50491	76.976	5.61778	0	0	0	0	0	0	0	176	8.47	216	0	0
1	29	114	70	118	66	116	68	176	66	74	21.31	59	187.55	83	89.58	52.46	106.4	65.26	375	1.29	0.83	4.72	3	0.26	207	3	19.33	4.6	1	41.5	0	4.85127	0.736569	3.1567	1.35696	122.038	4.97225	0	0	0	0	0	0	0	172	6.53	188	0	0
2	60	94	56	0	0	47	28	149	42	78	19	63	169.38	55	62.74	65.36	100.4	61.53	297	1.55	0.65	4.96	3	1.42	68.6	3	22.26	5	2	25.82	0	4.38127	0.69447	2.37232	1.69064	91.714	3.48246	0	0	0	0	0	0	0	184	5.9	138	0	0
1	64	154	79	145	79	149.5	79	156	52	90	21	0	150.6	70	64.92	66.07	94.3	61.99	289	1.35	0.59	3.62	2	0.43	129	1	25.57	6.2	3	22.8	0	3.8955	0.699661	1.8658	1.709	72.132	3.60346	1	0	0	1	0	0	0	172	7.31	228	0	0
2	59	140	89	0	0	70	44.5	162	82	108	31.4	0	211.25	48	79.54	51.13	34.4	133.22	198	1.26	0.89	13.68	4	0.72	72.2	3	20.56	11.8	4	55.53	1	5.4643	1.50361	3.45256	1.32256	133.476	4.41496	1	0	0	1	0	0	0	158	6.08	168	0	0
1	59	0	0	0	0	0	0	166	79.4	105	28.81	80	154.06	86	55.72	43.44	96.2	78.47	400	1.18	0.75	10.94	4	0.76	35.9	1	26.76	9.1	4	29.83	0	3.985	0.885666	2.45541	1.12364	94.926	3.09281	1	0	0	1	0	0	0	201	8.53	200	0	0
1	61	132	88	0	0	66	44	160	51	75	20	81	218.94	75	61.66	63.45	156.1	134.61	284	1.7	0.87	4.36	3	1.18	144.3	2	19.81	4.6	1	47.5	0	5.66322	1.5193	3.32561	1.64123	128.568	3.42251	1	0	0	1	0	0	0	163	5.37	243	0	0
1	34	120	76	118	77	119	76.5	170	54	70	18.8	47	168.48	88	62.84	48.11	121.7	91.35	343	1.2	0.73	5.32	4	0.66	105.6	1	22.02	5.2	2	38.4	0	4.35799	1.03104	2.64097	1.24444	102.1	3.48801	0	0	0	0	0	0	0	171	7.21	282	0	0
2	58	181	86	170	75	175.5	80.5	157	66	89	26.4	96	193.02	63	86.63	78.34	18.4	122.94	298	1.73	0.7	6.62	4	0.66	156.6	4	22.85	12.9	4	34.31	0	4.99276	1.38758	2.33037	2.02638	90.092	4.8085	1	0	0	1	0	0	0	157	10.41	332	0	0
2	73	182	84	184	91	183	87.5	149	49	90	22.4	60	217.69	66	59.99	35.92	96.2	152.12	343	1.1	1.03	5.24	3	1	69.1	3	21.69	10.1	4	62.17	1	5.63088	1.71693	3.9148	0.929126	151.346	3.32982	1	1	0	1	0	0	0	160	6.67	243	0	0
1	78	140	84	0	0	70	42	163	75	100	28.5	68	164.67	106	65.06	28.6	94.3	205.38	400	0.97	0.76	2.27	1	0.66	193.4	2	33.83	6.4	4	43.71	0	4.25944	2.31806	2.45717	0.739783	94.994	3.61123	0	1	0	0	0	0	0	190	7.58	187	0	0
1	77	0	0	111	72	55.5	36	159	48	93	18.99	55	186.85	75	59.65	75.99	466.8	53.37	312	1.5	0.7	33.66	4	4.62	236.6	3	27.42	278.7	4	32.58	0	4.83316	0.60237	2.59146	1.9656	100.186	3.31095	0	0	0	0	0	0	0	175	5.12	161	0	0
1	74	0	0	138	79	69	39.5	172	73	85	28.4	85	203.07	103	235.34	42.36	87.9	82.92	237	1.07	0.95	0.85	1	0.54	378.7	4	23.47	5.2	2	51.16	0	5.25272	0.935892	3.72804	1.09571	144.126	13.0628	0	0	0	0	1	0	0	164	5.91	252	0	0
1	60	127	88	129	84	128	86	165	63.9	83	23.47	72	205.57	86	76	32.16	386.9	186.02	488	1.07	1.13	1.49	1	0.46	627.8	4	25.9	7.5	4	73.21	1	5.31738	2.09955	3.52318	0.831868	136.206	4.21847	0	1	0	0	0	0	0	177	9.05	209	0	0
2	30	118	79	113	75	115.5	77	159	49	70	19	82	161.48	75	64.06	63.12	15.2	68.1	227	1.38	0.65	4.58	3	0.31	19.6	2	16.85	6.7	3	25.86	0	4.17693	0.768623	2.19193	1.6327	84.74	3.55573	0	0	0	0	0	0	0	165	4.34	238	0	0
1	48	136	91	130	97	133	94	168	58	75	17.5	84	243.2	57	82.01	90.31	49.5	98.12	273	2.06	0.85	1.95	1	1.02	281.4	3	25.93	5.1	2	49.45	0	6.29074	1.10745	3.44713	2.33601	133.266	4.55206	0	1	0	1	0	0	0	164	5.66	146	1	0
2	45	142	85	140	80	141	82.5	150	44	80	19.5	60	242.58	78	80.58	48.1	68	148.32	239	1.31	1.13	5.04	3	0.86	12.3	2	18.35	4.9	2	72.55	1	6.2747	1.67404	4.26322	1.24418	164.816	4.47269	0	1	0	1	0	0	0	148	7.36	235	1	1
2	34	106	48	104	66	105	57	163	41	65	15.3	76	128.63	57	71.1	52.58	52.3	39.94	272	1.1	0.52	3.03	2	0.78	86.2	3	15.98	5.5	3	23.1	0	3.32721	0.45079	1.76053	1.36006	68.062	3.94649	0	0	0	0	0	0	0	151	5.37	214	0	0
1	33	126	82	134	80	130	81	163	60	75	23.6	76	171.53	63	67.49	50.18	78.6	80.79	332	1.2	0.71	0.53	1	0.33	334.9	4	19.26	4.9	2	36.2	0	4.43689	0.911851	2.72095	1.29798	105.192	3.74611	0	0	0	0	0	0	0	178	7.48	312	0	0
2	44	0	0	98	64	49	32	164	53	65	21.4	56	129.67	67	60.83	49.57	10.7	46.89	261	1.21	0.53	0.89	1	0.63	17.7	2	21.19	7.8	4	18.17	0	3.35411	0.529233	1.82933	1.2822	70.722	3.37644	0	0	0	0	0	0	0	158	6.92	201	0	0
2	35	102	67	105	66	103.5	66.5	171	51	63	17	86	184.84	61	69.96	73.3	540.4	44.11	208	1.59	0.72	5.52	4	0.78	1.5	1	14.98	5	2	35.67	0	4.78117	0.497856	2.65696	1.89602	102.718	3.88321	0	0	0	0	0	0	0	137	6.51	179	0	0
1	43	109	67	107	66	108	66.5	165	58	74	21.6	61	154	74	65.79	47.57	349.6	48.37	442	1.15	0.69	3.25	2	0.42	347	4	26.76	4.9	2	36.55	0	3.98345	0.545937	2.50274	1.23047	96.756	3.65175	0	0	0	0	0	0	0	191	9.07	232	0	0
2	30	110	79	0	0	55	39.5	156	48	65	19.8	83	115.18	48	70.9	39.95	20.9	51.99	247	1.04	0.51	4.93	3	0.68	21.1	2	17.43	4.6	1	19.88	0	2.97931	0.586795	1.67698	1.03337	64.832	3.93539	0	1	0	0	0	0	0	142	6.56	317	0	0
1	62	154	99	159	98	156.5	98.5	165	83.7	103	30.74	82	246.05	81	64.93	25.12	55.5	420.76	382	1.09	1.13	0.58	1	0.49	113.3	1	33.9	7.9	4	89.34	1	6.36446	4.74898	3.53797	0.649767	136.778	3.60402	0	1	0	1	0	0	0	208	5.71	197	1	0
1	38	130	82	130	82	130	82	183	66	97	19.71	80	165.23	66	75.58	59.24	99.7	109.97	528	1.44	0.66	2.02	1	0.24	200.2	3	23.11	6.5	4	36.36	0	4.27393	1.2412	2.17268	1.53233	83.996	4.19516	0	0	0	0	0	0	0	164	8.05	250	0	0
2	57	114	67	0	0	57	33.5	157	52	80	21.1	65	184.36	67	79.99	44.2	76	101.36	182	1.13	0.84	1.83	1	0.36	183.9	4	23.67	5.2	2	48.17	0	4.76875	1.14402	3.10109	1.1433	119.888	4.43994	0	0	0	0	0	0	0	163	4.71	293	0	0
2	28	148	86	0	0	74	43	160	47	65	18.36	99	172.92	67	60.34	58.48	337.7	64.12	260	1.29	0.69	1.41	1	0.35	78.7	3	19.71	12.5	4	31.2	0	4.47284	0.723702	2.62845	1.51267	101.616	3.34925	0	0	0	0	0	0	0	164	7.53	323	0	0
1	40	120	84	110	78	115	81	175	61	70	19.92	65	146.79	64	67.84	42.86	159	102.38	412	1.13	0.63	5	3	0.28	127.4	1	23.28	5.3	3	34.2	0	3.79695	1.15553	2.15867	1.10864	83.454	3.76554	0	0	0	0	0	0	0	177	6.22	253	0	0
2	32	0	0	132	61	66	30.5	162	65	75	24.77	91	198.29	41	71.94	48.76	350.4	84.04	321	1.18	0.83	1.53	1	0.46	16.7	2	17.17	6.3	3	49.63	0	5.12907	0.948533	3.43306	1.26125	132.722	3.99312	0	0	0	0	0	0	0	138	7.95	278	0	0
2	50	117	78	108	76	112.5	77	161	46	66	17.1	74	242.3	75	69.13	62.76	125.9	85.8	353	1.58	1.01	2.32	1	0.51	131.6	4	21.23	5.3	2	57.63	1	6.26746	0.968397	4.20021	1.62338	162.38	3.83714	0	1	0	0	0	0	0	152	8.71	278	1	1
2	29	110	69	104	65	107	67	157	44	55	21.1	65	199.4	72	66.59	53.66	18.7	81.44	314	1.3	0.86	5.09	3	0.29	171.3	4	19.36	5	2	40.86	0	5.15779	0.919187	3.34847	1.388	129.452	3.69616	0	0	0	0	0	0	0	151	5.37	274	0	0
1	29	149	89	140	86	144.5	87.5	169	65	76	23.1	65	132.86	76	78.78	36.06	54.3	120.63	384	1.1	0.63	0.6	1	0.53	153.9	2	21.46	4.6	1	29.31	0	3.43663	1.36151	1.87982	0.932747	72.674	4.37278	0	1	0	1	0	0	0	191	8.12	201	0	0
2	34	129	78	126	82	127.5	80	163	62.8	81	23.64	67	158.29	53	61.52	46.72	69.6	102.29	287	1.17	0.66	4.68	3	0.44	19.1	2	18.88	4.7	1	34.54	0	4.09441	1.15451	2.35675	1.20848	91.112	3.41474	0	0	0	0	0	0	0	155	5.01	137	0	0
1	37	0	0	123	79	61.5	39.5	162	46	64	17.8	82	152.96	69	52.95	44.51	71.9	148.14	271	1.23	0.65	3.97	2	0.37	52.2	1	24.98	4.7	1	36.97	0	3.95654	1.67201	2.03885	1.15132	78.822	2.93905	0	0	0	0	0	0	0	195	7.64	300	0	0
1	57	188	118	184	110	186	114	171	84	110	28.73	75	202.66	85	99.96	12.94	290.9	577.03	418	0.76	0.74	1.19	1	1.22	787.2	4	22.06	5.4	3	48.25	0	5.24211	6.51275	1.92225	0.334713	74.314	5.5484	1	1	0	1	0	0	0	167	7.78	295	0	0
1	26	136	57	0	0	68	28.5	179	71	80	22.16	63	156.98	81	73.68	35.44	299.3	143.42	308	1.06	0.7	5.41	4	0.1	370.3	4	16.92	4.6	1	37.96	0	4.06053	1.61874	2.40186	0.91671	92.856	4.0897	0	1	0	0	0	0	0	183	8.15	225	0	0
2	58	149	67	154	68	151.5	67.5	158	59	92	27.8	62	246.81	61	84.79	36.8	80.8	303.86	327	1.26	1.05	0.03	1	0.31	253.9	4	20.12	6.8	3	78.65	1	6.38412	3.42957	3.86027	0.951888	149.238	4.70637	0	1	0	1	0	0	0	167	7.11	199	1	0
2	59	123	86	127	86	125	86	153	52.9	83	22.6	67	167.24	54	78.74	43.75	625.8	98.03	248	1.18	0.73	2.89	2	0.42	266	4	16.45	6	3	33.92	0	4.32592	1.10643	2.68712	1.13166	103.884	4.37056	0	0	0	0	0	0	0	149	7.32	217	0	0
1	25	132	77	0	0	66	38.5	173	53.1	63	17.74	95	193.92	81	68.54	59.09	297.1	159.26	370	1.48	0.75	5.55	4	0.26	294.6	3	22.98	4.7	1	47.87	0	5.01604	1.79752	2.66368	1.52845	102.978	3.8044	0	0	0	0	0	0	0	179	10.49	181	0	0
1	34	109	69	0	0	54.5	34.5	166	56	74	20.32	65	148.66	68	71.28	56	21.6	58.29	380	1.31	0.64	3.74	2	0.29	100	1	18.49	5.6	3	27.75	0	3.84532	0.657901	2.09524	1.44853	81.002	3.95648	0	0	0	0	0	0	0	171	8.13	224	0	0
2	35	0	0	120	69	60	34.5	154	57	74	24.03	72	191.63	63	74.2	39.76	89.5	113.03	311	1.08	0.88	4.18	2	0.39	159.3	4	21.63	4.5	1	53.82	0	4.9568	1.27573	3.34361	1.02845	129.264	4.11856	0	1	0	0	0	0	0	132	7.34	293	0	0
1	32	141	80	0	0	70.5	40	166	67	83	24.31	82	212.71	80	73.78	59.29	68.7	109.88	477	1.54	0.93	3.67	2	0.51	118	1	25.41	4.6	1	67.43	1	5.50207	1.24018	3.4	1.53363	131.444	4.09525	0	0	0	0	0	0	0	190	7.32	202	0	0
1	30	120	57	0	0	60	28.5	174	53	67	17.51	62	171.53	75	56.91	46.66	16.5	108.87	358	1.23	0.77	4.38	3	0.25	196.8	2	21.43	4.6	1	44.23	0	4.43689	1.22878	2.66674	1.20693	103.096	3.15886	0	0	0	0	0	0	0	199	7.27	165	0	0
2	28	114	74	120	80	117	77	163	50	62	18.82	87	151.22	72	69.79	57.03	41.1	69.59	242	1.28	0.6	5.44	4	0.54	1	1	24.91	5.2	2	26.9	0	3.91154	0.78544	2.07636	1.47517	80.272	3.87378	0	0	0	0	0	0	0	111	4.2	153	0	0
1	33	111	65	0	0	55.5	32.5	181	74	87	22.59	58	201.34	78	77.63	43.67	414.7	74.31	331	1.17	0.94	4.65	3	0.28	332.2	4	24.95	5.5	3	56.79	1	5.20797	0.838713	3.69395	1.12959	142.808	4.30895	0	0	0	0	0	0	0	178	6.75	268	0	0
2	44	216	97	208	94	212	95.5	167	59	80	21.16	0	240.02	61	65.79	73.4	106.4	75.52	240	1.57	0.94	4.16	2	0.5	117.5	3	17.43	6.8	3	53.97	0	6.20848	0.85237	3.91919	1.8986	151.516	3.65175	0	1	0	1	0	0	0	146	6.89	153	0	0
2	51	138	71	136	81	137	76	155	74.4	94	30.97	70	200.16	58	75.79	32.31	54.6	174.91	348	1	0.9	4.31	2	0.77	50.2	3	14.25	9.1	4	61.82	1	5.17744	1.97415	3.43683	0.835748	132.868	4.20682	0	1	0	0	0	0	0	154	10.06	337	0	0
2	48	210	116	0	0	105	58	150	41	65	18.1	76	179.64	54	73.54	76.05	69.6	76.82	167	1.74	0.65	5.55	4	0.45	7.4	1	21.36	4.6	1	30.51	0	4.64666	0.867043	2.2821	1.96715	88.226	4.08193	0	0	0	0	0	0	0	100	5.52	270	0	0
1	41	118	77	119	76	118.5	76.5	162	49	79	20	79	164.6	78	72.63	52.8	150.5	68.66	346	1.25	0.69	4.92	3	0.2	53.2	1	21.06	4.6	1	34.04	0	4.25763	0.774944	2.53668	1.36575	98.068	4.03142	0	0	0	0	0	0	0	174	6.93	291	0	0
1	48	116	81	0	0	58	40.5	172	72.9	86	24.64	80	157.05	89	88.85	38.91	14.2	103.96	364	1.03	0.73	3.03	2	1.67	685.6	4	15.84	5.9	3	42.78	0	4.06234	1.17336	2.51805	1.00647	97.348	4.93173	0	1	0	0	0	0	0	169	4.27	251	0	0
2	47	110	67	0	0	55	33.5	160	47	69	18.36	51	142.08	76	66.59	76.04	36.3	46.89	303	1.46	0.47	4.72	3	0.4	13.7	2	23.18	4.7	1	14.91	0	3.67512	0.529233	1.46565	1.96689	56.662	3.69616	0	0	0	0	0	0	0	130	4.21	264	0	0
1	55	146	98	145	98	145.5	98	170	70	87	24.22	65	183.94	68	70.31	64.07	69.6	73.76	419	1.43	0.73	9.49	4	0.45	187.3	2	19.12	11.1	4	34.15	0	4.75789	0.832506	2.71904	1.65727	105.118	3.90264	0	0	0	1	0	0	0	196	6.94	156	0	0
2	42	110	73	0	0	55	36.5	155	52.4	70	21.81	74	191.01	47	89.34	71.35	28.6	85.34	226	1.66	0.67	3.96	2	0.32	11.8	1	15.66	5.1	2	31.56	0	4.94077	0.963205	2.6537	1.84558	102.592	4.95893	0	0	0	0	0	0	0	150	5.68	182	0	0
1	30	120	56	0	0	60	28	166	57.2	73	20.76	60	171.53	73	84.34	40.72	32.5	91.73	251	1.11	0.77	5.56	4	0.33	462.8	4	20.99	4.5	1	39.95	0	4.43689	1.03533	2.90905	1.05329	112.464	4.68139	0	0	0	0	0	0	0	184	6.28	213	0	0
2	30	0	0	0	0	0	0	144	37.3	64	17.99	0	120.38	49	63.29	52.91	52	42.73	202	1.13	0.5	3.07	2	0.36	42.3	3	14.07	4.7	1	14.95	0	3.11381	0.48228	1.52416	1.3686	58.924	3.51299	0	0	0	0	0	0	0	154	9.33	298	0	0
1	21	116	62	0	0	58	31	172	53.9	63	18.22	76	126.62	80	71.14	39.83	280	73.94	357	1.04	0.58	5.72	4	0.32	250.2	3	20.52	5.1	2	33.71	0	3.27522	0.834537	1.86244	1.03026	72.002	3.94871	0	1	0	0	0	0	0	171	5.64	210	0	0
2	19	121	76	0	0	60.5	38	157	44.2	60	17.93	98	169.8	70	70.9	51.96	374.6	119.52	270	1.36	0.69	5.79	4	0.63	30	2	18.53	5.9	3	44.46	0	4.39214	1.34898	2.4298	1.34402	93.936	3.93539	0	0	0	0	0	0	0	151	5.04	365	0	0
1	32	119	69	120	76	119.5	72.5	182	62.3	75	18.81	0	114.49	69	61.38	39.18	37.9	74.69	268	1.04	0.52	5.21	3	0.23	168.5	2	18.42	4.6	1	20.79	0	2.96146	0.843002	1.56161	1.01345	60.372	3.40697	0	1	0	0	0	0	0	190	6.05	166	0	0
1	41	131	77	122	78	126.5	77.5	163	60.9	82	22.92	68	165.3	79	71.25	44.77	33.4	187.42	184	1.14	0.64	4.08	2	0.4	153.4	2	26.33	4.9	2	39.09	0	4.27574	2.11535	2.14811	1.15804	83.046	3.95482	0	0	0	0	0	0	0	168	5.42	147	0	0
2	39	102	70	0	0	51	35	163	47.6	62	17.92	71	166.41	68	82.74	80.61	34.4	87.38	272	1.91	0.52	5	3	0.42	21.6	2	24.82	5.2	2	23.53	0	4.30445	0.98623	1.7673	2.0851	68.324	4.59258	0	0	0	0	0	0	0	149	5.28	226	0	0
2	54	171	96	167	95	169	95.5	156	63	95	25.89	92	307.46	59	82.67	54.86	401.1	248.09	483	1.66	1.37	1.41	1	0.59	345.6	4	21.53	6.5	3	109.65	1	7.95292	2.80011	5.25044	1.41904	202.982	4.5887	0	1	0	1	0	0	0	163	8.72	299	1	1
2	27	124	67	0	0	62	33.5	154	41.5	60	17.5	73	146.72	47	67.53	54.91	275.2	92.01	267	1.41	0.63	5.21	3	0.41	3.9	1	15.34	5.8	3	33.05	0	3.79514	1.03849	1.89881	1.42033	73.408	3.74833	0	0	0	0	0	0	0	107	7.55	393	0	0
2	25	110	60	0	0	55	30	163	49.4	65	85	73	123.08	60	70.69	50.51	15.2	46.71	202	1.16	0.48	5.58	4	0.38	54.2	3	22.49	4.3	1	17.49	0	3.18365	0.527201	1.63549	1.30652	63.228	3.92373	0	0	0	0	0	0	0	154	6.74	288	0	0
2	31	126	77	0	0	63	38.5	152	49.5	65	21.42	86	163.29	55	83.43	51.62	53.6	62.27	184	1.28	0.72	5.86	4	0.47	8.3	1	17.07	4.7	1	43.98	0	4.22375	0.702822	2.56637	1.33523	99.216	4.63088	0	0	0	0	0	0	0	151	9.46	246	0	0
1	35	173	98	171	99	172	98.5	176	79.2	80	25.57	58	194.83	74	83.12	40.74	46.2	201.22	313	1.17	0.79	3.35	2	0.39	224.3	3	20.93	5.8	3	47.19	0	5.03958	2.27111	2.9448	1.0538	113.846	4.61368	0	1	0	1	0	0	0	180	7.38	340	0	0
2	28	110	70	0	0	55	35	143	70	89	34.23	70	134.8	56	79.41	40.33	369.5	54.12	282	0.99	0.61	5.75	4	0.29	12.3	2	20.62	4.6	1	27.14	0	3.48681	0.610835	2.16363	1.0432	83.646	4.40775	1	0	0	1	0	0	0	156	8.54	246	0	0
1	27	124	68	0	0	62	34	170	59.1	70	20.45	57	227.26	73	90.79	45.92	53.3	142.77	301	1.24	1.02	4.49	3	0.24	198.5	2	19.57	6.3	4	66.08	1	5.87843	1.6114	3.95204	1.18779	152.786	5.03941	0	0	0	0	0	0	0	168	5.76	252	0	0
1	32	118	72	0	0	59	36	177	64.5	78	20.59	71	179.92	76	74.51	26.67	241.4	179.64	304	0.96	0.85	3.46	2	0.29	158.8	2	27.29	4.8	2	59.59	1	4.65391	2.02754	3.03471	0.68986	117.322	4.13577	0	1	0	0	0	0	0	170	6.14	209	0	0
1	34	118	69	0	0	59	34.5	179	70	72	21.85	75	175.21	92	69.41	66.53	139.8	78.86	379	1.51	0.67	1.69	1	0.4	315.8	4	28.63	4.8	2	31.21	0	4.53207	0.890068	2.40321	1.7209	92.908	3.85269	0	0	0	0	0	0	0	170	7.74	221	0	0
2	37	142	84	0	0	71	42	158	80	59	32.05	65	202.66	53	69.23	72.04	58.4	97.47	253	1.61	0.75	4.93	3	0.19	192.9	4	18.63	5.9	3	37.71	0	5.24211	1.10011	2.87444	1.86342	111.126	3.8427	0	0	0	0	0	0	0	159	6.12	249	0	0
2	19	105	78	102	74	103.5	76	159	60	70	23.73	91	178.67	68	75.2	64.93	167.7	86.17	279	1.37	0.67	2.16	1	0.67	23.1	2	17.03	5.3	2	32.21	0	4.62157	0.972573	2.49628	1.67951	96.506	4.17407	0	0	0	0	0	0	0	151	8.29	261	0	0
2	22	106	66	0	0	53	33	157	48.9	64	19.84	90	145.68	63	72.18	58.6	69.6	60.14	373	1.25	0.56	4.91	3	0.29	15.7	2	20.66	5.1	2	22.8	0	3.76824	0.678781	1.94133	1.51578	75.052	4.00644	0	0	0	0	0	0	0	148	8.35	306	0	0
2	39	124	84	0	0	62	42	160	68.6	80	26.8	73	154.83	54	73.78	45.42	142.9	70.05	285	1.16	0.72	5.29	3	0.63	4.9	1	18.88	5.7	3	37.12	0	4.00491	0.790632	2.46767	1.17486	95.4	4.09525	0	0	0	0	0	0	0	89	6.99	302	0	0
2	59	137	89	0	0	68.5	44.5	152	47.2	84	20.43	72	173.75	48	76.31	51.76	71.2	83.3	226	1.29	0.72	4.41	2	0.45	153.9	4	16.67	5.3	2	33.96	0	4.49431	0.940181	2.72452	1.33885	105.33	4.23568	1	0	0	1	0	0	0	150	5.62	322	0	0
1	56	137	87	0	0	68.5	43.5	172	71	92	24	89	168.76	76	66.52	33.26	49.8	151.02	427	1.08	0.79	1.68	1	0.66	100.5	1	22.29	5.9	3	54.03	0	4.36524	1.70451	2.72364	0.860321	105.296	3.69227	1	1	0	1	0	0	0	187	8.53	176	0	0
1	33	118	75	0	0	59	37.5	165	53.3	72	19.58	66	220.89	69	77.53	50.78	36	117.21	341	1.3	0.93	5.64	4	0.31	219.6	3	24.75	4.3	1	58.08	1	5.71366	1.32291	3.79379	1.3135	146.668	4.3034	0	0	0	0	0	0	0	164	5.73	209	0	0
2	34	122	73	0	0	61	36.5	162	53.3	73	20.31	57	145.47	61	72.22	48.02	352	107.66	221	1.2	0.63	5.04	3	0.69	8.3	1	15.66	4.8	1	35.14	0	3.7628	1.21512	1.96374	1.24211	75.918	4.00866	0	0	0	0	0	0	0	110	6.68	234	0	0
1	39	141	88	137	85	139	86.5	173	62	71	20.72	94	156.25	101	90.38	46.11	33.4	72.61	383	1.13	0.72	5.23	3	0.21	438	4	28.16	4.7	1	25.98	0	4.04165	0.819526	2.47331	1.19271	95.618	5.01665	0	0	0	0	0	0	0	188	8.29	175	0	0
2	20	104	67	106	60	105	63.5	156	49	63	20.13	75	148.9	58	81.15	51.36	3.3	41.02	336	1.15	0.62	5.74	4	0.29	45.8	3	14.42	4.4	1	19.22	0	3.85153	0.46298	2.31081	1.3285	89.336	4.50433	0	0	0	0	0	0	0	159	6.43	210	0	0
2	34	118	64	123	65	120.5	64.5	164	44	68	16.36	62	111.55	55	72.82	52.34	463.8	46.77	255	1.2	0.48	1.56	1	0.32	2.5	1	12.62	6.9	3	14.64	0	2.88541	0.527878	1.2896	1.35385	49.856	4.04196	0	0	0	0	0	0	0	113	5.07	344	0	0
1	44	132	83	133	76	132.5	79.5	168	66	87	23.38	63	122.56	62	104.94	37.83	64.2	110.22	348	1.02	0.56	5.43	4	0.28	547	4	12.71	4.6	1	22.19	0	3.1702	1.24402	1.62147	0.978531	62.686	5.82482	0	1	0	0	0	0	0	183	8.02	201	0	0
2	54	120	99	150	88	135	93.5	151	52	72	22.81	78	173.72	46	81.12	56.23	98.8	60.38	315	1.32	0.7	5.11	3	0.51	103.6	3	12.52	6.2	3	29.78	0	4.49353	0.68149	2.72669	1.45447	105.414	4.50266	0	0	0	1	0	0	0	148	6.02	225	0	0
1	57	133	86	121	81	127	83.5	171	70	78	23.94	63	249.83	57	86.71	57.84	778.8	140.23	301	1.39	1.1	3.97	2	0.26	283.3	3	24.42	7.2	4	65.7	1	6.46223	1.58273	4.24066	1.49612	163.944	4.81294	0	1	0	0	0	0	0	162	7.13	288	1	1
2	51	129	76	131	72	130	74	158	58	73	23.23	86	174.83	64	90.46	48.65	32.5	123.37	202	1.21	0.71	0.68	1	0.89	387.2	4	17.28	6.5	3	38.13	0	4.52225	1.39244	2.62561	1.25841	101.506	5.02109	0	0	0	0	0	0	0	160	7.26	229	0	0
2	45	116	96	111	71	113.5	83.5	155	42	73	17.48	64	155.63	41	82.92	66.81	12.6	47.97	223	1.39	0.59	5.76	4	0.39	4.9	1	8.77	4.5	1	20.48	0	4.02561	0.541422	2.0493	1.72814	79.226	4.60258	0	0	0	0	0	0	0	124	8.64	254	0	0
2	43	117	80	112	78	114.5	79	164	61	77	22.68	78	211.98	69	88.06	40.35	25.1	109.39	257	1.1	0.99	5.16	3	0.24	87.8	3	17.17	4.9	2	59.13	1	5.48319	1.23465	3.87356	1.04371	149.752	4.88788	0	0	0	0	0	0	0	155	6.9	199	0	0
2	63	132	71	137	72	134.5	71.5	157	70	99	28.4	81	180.52	61	94.03	32.92	54.3	154.5	342	0.97	0.86	13.75	4	0.38	253.2	4	15.09	13.2	4	49.54	0	4.66943	1.74379	3.01862	0.851526	116.7	5.21925	1	1	0	1	0	0	0	153	8.21	273	0	0
1	67	196	112	199	115	197.5	113.5	173	62	97	20.72	84	165.61	104	136.22	31.89	526.5	139.49	366	1.02	0.8	18.48	4	14.38	63.2	1	28.23	11.7	4	35.4	0	4.28376	1.57438	2.73725	0.824884	105.822	7.56106	0	1	0	1	1	0	0	163	8.11	113	0	0
1	24	94	57	104	61	99	59	173	57	63	19.05	80	146.97	81	87.82	51.43	413.8	114.85	390	1.26	0.62	5.03	3	0.2	217.3	3	58.09	4.9	2	31.53	0	3.8016	1.29628	1.87713	1.33032	72.57	4.87456	0	0	0	0	0	0	0	185	7.38	286	0	0
2	37	186	95	180	82	183	88.5	150	56	78	24.89	82	154.45	65	94.8	63.01	56.8	66.87	266	1.28	0.61	3.84	2	0.4	60.2	3	15.3	5.3	2	22.45	0	3.99509	0.75474	2.0193	1.62985	78.066	5.26199	0	0	0	1	0	0	0	155	4.74	271	0	0
2	55	133	74	138	71	135.5	72.5	179	92	99	28.71	91	184.05	56	108.37	42.49	8.4	170.15	326	1.22	0.86	3.65	2	0.47	191.7	4	13.87	9.9	4	56.14	1	4.76073	1.92043	2.78143	1.09907	107.53	6.01521	0	0	0	0	0	0	0	167	10.49	208	0	0
2	53	148	87	135	79	141.5	83	159	49	65	19.38	65	187.18	54	142.12	80.37	637.5	53.62	302	1.72	0.66	3.31	2	0.57	122.7	4	15.16	5.1	2	24.25	0	4.8417	0.605192	2.48541	2.07889	96.086	7.88854	1	0	0	1	1	0	0	170	5.9	248	0	0
2	31	116	65	122	58	119	61.5	156	48	70	19.72	79	188.9	55	84.8	63.64	138.8	51.03	257	1.39	0.76	3.74	2	0.56	3.9	1	9.87	5.1	2	33	0	4.88619	0.575959	2.97605	1.64615	115.054	4.70693	0	0	0	0	0	0	0	123	6.41	287	0	0
2	52	143	63	139	70	141	66.5	159	59	86	23.34	67	178.92	63	87.06	59.05	125.2	101.24	251	1.32	0.74	5.17	3	0.31	33.4	2	19.36	5.8	3	34.61	0	4.62804	1.14266	2.57688	1.52742	99.622	4.83237	0	0	0	1	0	0	0	165	6.83	214	0	0
1	27	137	57	136	63	136.5	60	165	45	62	16.53	81	148.15	63	77.51	67.16	148.3	33.8	257	1.32	0.57	0.62	1	0.15	104.6	1	19.88	9.4	4	19.02	0	3.83213	0.38149	1.92007	1.7372	74.23	4.30229	0	0	0	0	0	0	0	138	5.22	312	0	0
2	36	105	61	123	56	114	58.5	171	59	76	20.18	71	168.94	54	96.78	56.57	43.4	42.69	239	1.24	0.7	5.51	4	0.42	6.4	1	12.08	4.5	1	24.17	0	4.36989	0.481828	2.68577	1.46327	103.832	5.37189	0	0	0	0	0	0	0	121	6.02	282	0	0
2	33	117	65	121	64	119	64.5	165	66	83	24.24	62	148.22	58	78.79	50.07	32.2	56.4	246	1.14	0.66	0.21	1	0.36	36.4	2	13.13	7	3	24.45	0	3.83394	0.636569	2.24703	1.29514	86.87	4.37333	0	0	0	0	0	0	0	148	6.39	222	0	0
2	28	104	69	118	62	111	65.5	155	52	74	21.64	66	166.86	50	83.27	37.62	67.4	91.79	274	0.99	0.79	3.33	2	0.31	9.3	1	16.89	5.7	3	47.67	0	4.31609	1.036	2.86813	0.973099	110.882	4.622	0	1	0	0	0	0	0	142	7.28	205	0	0
2	29	135	80	134	75	134.5	77.5	174	56	77	18.5	77	162.08	64	87.68	61.74	63.5	47.79	280	1.27	0.66	4.21	2	0.2	102	3	18.03	5	2	21.83	0	4.19245	0.539391	2.34822	1.597	90.782	4.86679	0	0	0	0	0	0	0	156	6.66	224	0	0
2	34	95	60	96	55	95.5	57.5	161	61	91	23.53	66	170.53	70	81.53	61.43	48.5	65.3	248	1.27	0.69	5.19	3	0.45	39.3	2	13.6	4.7	1	28.17	0	4.41102	0.73702	2.48422	1.58898	96.04	4.52542	0	0	0	0	0	0	0	143	6.82	291	0	0
1	54	132	45	141	73	136.5	59	179	82	96	25.59	66	163.54	88	92.68	39.38	61.9	81.88	270	0.99	0.77	6.35	4	0.49	166.4	2	22.68	6.4	4	30.42	0	4.23021	0.924153	2.788	1.01862	107.784	5.14432	0	1	0	0	0	0	0	157	6.75	243	0	0
2	52	134	73	130	73	132	73	164	64	91	23.8	68	165.82	57	94.56	44.6	397	99.39	259	1.16	0.73	5.05	3	0.76	133.2	4	13.2	5.4	2	38.06	0	4.28919	1.12178	2.62137	1.15365	101.342	5.24867	0	0	0	0	0	0	0	146	7.01	207	0	0
2	49	111	69	111	65	111	67	156	41	63	16.85	72	147.23	44	81.48	45.32	15.2	77.3	165	1.09	0.66	5.54	4	0.46	4.4	1	23.74	4.8	1	21.13	0	3.80833	0.87246	2.23616	1.17227	86.45	4.52265	0	0	0	0	0	0	0	123	7.83	396	0	0
1	66	136	79	133	76	134.5	77.5	158	52	84	20.83	79	205.38	78	80.68	56.25	124.9	55.9	367	1.29	0.89	0.92	1	0.74	520.1	4	26.33	9.2	4	37.82	0	5.31247	0.630926	3.56829	1.45499	137.95	4.47824	0	0	0	0	0	0	0	0	0	0	0	0
1	43	145	74	131	73	138	73.5	175	76	83	24.82	62	137.8	71	72	36.88	247.2	79.05	332	0.98	0.68	4.62	3	0.12	234.8	3	20.35	5.3	3	31.47	0	3.56441	0.892212	2.2015	0.953958	85.11	3.99645	0	1	0	0	0	0	0	161	6.75	209	0	0
2	44	163	73	161	81	162	77	145	51	85	24.26	65	174.4	62	85.33	54.39	725.1	96.93	281	1.3	0.71	2.82	1	0.36	13.3	2	19.6	7.2	4	35.27	0	4.51112	1.09402	2.60279	1.40688	100.624	4.73635	0	0	0	1	0	0	0	131	5.23	240	0	0
2	28	110	70	110	80	110	75	156	43	70	17.67	0	125.39	55	76.61	48.66	14.2	105.82	252	1.31	0.49	5.79	4	0.27	4.4	1	14.95	4.4	1	21.38	0	3.2434	1.19436	1.4373	1.25867	55.566	4.25233	0	0	0	0	0	0	0	157	6.64	291	0	0
1	34	128	70	138	74	133	72	166	70	78	25.4	77	155.41	61	91.48	43.46	34.4	211.8	289	1.15	0.59	5.32	4	0.25	354.4	4	16.31	4.5	1	28.43	0	4.01992	2.39052	1.80005	1.12416	69.59	5.07771	0	1	0	0	0	0	0	172	5.54	156	0	0
2	27	154	82	147	85	150.5	83.5	147	66	79	30.54	111	185.14	63	77.55	55.84	225.5	68.96	444	1.29	0.78	0.13	1	0.41	39.8	2	11.3	6.7	3	39.26	0	4.78893	0.77833	2.98779	1.44439	115.508	4.30451	0	0	0	1	0	0	0	121	5.3	256	0	0
1	41	135	75	134	77	134.5	76	183	65	76	19.41	72	152.42	99	79.64	61.45	122.4	60.8	308	1.38	0.63	4.97	3	0.06	184.5	2	22.12	5.2	2	27.65	0	3.94258	0.68623	2.03854	1.5895	78.81	4.42052	0	0	0	0	0	0	0	170	6.39	267	0	0
2	43	125	89	138	75	131.5	82	170	55	70	19.03	56	165.8	53	72.62	62.26	25.7	41.63	211	1.3	0.66	5.27	3	0.49	2	1	16.31	5.6	3	29.99	0	4.28867	0.469865	2.46286	1.61045	95.214	4.03086	0	0	0	0	0	0	0	95	4.35	322	0	0
1	57	107	64	106	69	106.5	66.5	164	54	76	20.08	79	200.81	79	68.32	64.57	373.5	87.3	251	1.5	0.82	5.47	4	0.41	187.8	2	24	11.4	4	39.94	0	5.19426	0.985327	3.07243	1.6702	118.78	3.79218	0	0	0	0	0	0	0	182	7.14	192	0	0
1	28	154	94	148	88	151	91	169	49	66	17.16	62	104.04	87	81.23	45.98	25.4	47.19	224	1.04	0.45	5.16	3	0.14	211	3	19.16	6.9	4	10.81	0	2.69115	0.532619	1.25768	1.18934	48.622	4.50877	0	0	0	1	0	0	0	177	5.83	142	0	0
2	28	111	55	109	65	110	60	162	43	61	16.38	76	141.47	42	85.05	63.77	39.2	37.74	170	1.29	0.51	5.51	4	0.53	2.9	1	7.81	4.6	1	17.66	0	3.65934	0.425959	1.81459	1.64951	70.152	4.7208	0	0	0	0	0	0	0	104	5.89	477	0	0
2	30	115	71	116	71	115.5	71	164	47	68	21	96	149.86	56	92.07	61.87	45.9	67.01	249	1.5	0.58	5.15	3	0.38	60.7	3	9.94	7.9	4	23.73	0	3.87636	0.756321	1.92933	1.60036	74.588	5.11046	0	0	0	0	0	0	0	161	11.35	280	0	0
1	27	100	55	94	44	97	49.5	162	61	83	23.24	65	192.63	74	90.68	47.53	72.5	91.28	368	1.17	0.84	5	3	0.2	366.8	4	13.23	4.8	2	38.26	0	4.98267	1.03025	3.28101	1.22944	126.844	5.0333	0	0	0	0	0	0	0	175	4.93	230	0	0
2	23	112	58	120	52	116	55	161	60	85	23.15	88	205.31	58	79.12	60.14	84.1	208.65	251	1.71	0.9	18.75	4	0.66	33.4	2	9.53	12.3	4	45.72	0	5.31066	2.35497	2.67563	1.55561	103.44	4.39165	0	1	0	0	0	0	0	127	7.52	190	0	0
1	22	125	77	114	77	119.5	77	162	52	65	19.81	83	130.66	83	73.94	42.86	335.6	76.46	323	1.12	0.62	3.39	2	0.18	111.8	1	23.74	5.7	3	27.94	0	3.37972	0.86298	1.87553	1.10864	72.508	4.10413	0	0	0	0	0	0	0	159	5.36	205	0	0
1	42	115	57	114	62	114.5	59.5	173	84	95	28.07	79	201.09	70	78.77	34.85	43.4	264.04	395	1.11	0.9	5.91	4	0.48	167.5	2	33.27	7.3	4	62.51	1	5.2015	2.98014	2.93409	0.901449	113.432	4.37222	1	1	0	1	0	0	0	184	8.51	178	0	0
2	86	229	136	194	115	211.5	125.5	147	53	94	24.53	101	231.51	75	83.21	54.14	86.9	104.16	285	1.26	1.04	2.28	1	0.87	407.4	4	24.59	5.6	3	56.81	1	5.98836	1.17562	4.04909	1.40041	156.538	4.61867	1	0	0	1	0	0	0	166	5.74	222	0	0
1	34	93	54	90	54	91.5	54	184	63	72	18.61	84	127.13	66	84.74	24.34	171.4	114.07	264	0.71	0.79	71.58	4	1	986.6	4	17.43	166.9	4	24.54	0	3.28841	1.28747	2.0687	0.629591	79.976	4.7036	0	1	0	0	0	0	0	154	8.14	200	0	0
1	35	150	95	139	85	144.5	90	174	79	83	20	65	162.55	71	78.7	56.9	74.4	80.91	258	1.31	0.64	2.43	1	0.28	134.2	2	17.21	5.3	3	28.18	0	4.2046	0.913205	2.31423	1.47181	89.468	4.36834	0	0	0	1	0	0	0	155	6.65	210	0	0
2	21	107	57	102	58	104.5	57.5	156	46	71	20	75	279.9	53	65.57	80.63	506.4	168.73	244	2.04	1.3	0.76	1	1.35	9.8	1	10.65	5	2	83.11	1	7.24004	1.9044	4.28153	2.08562	165.524	3.63954	0	1	0	0	0	0	0	128	10.29	191	1	1
2	20	99	60	99	63	99	61.5	161	61	70	23.53	79	158.25	62	61.48	58.41	557.3	63.31	249	1.18	0.63	5.36	3	0.17	19.6	2	12.3	4.8	1	26.68	0	4.09338	0.71456	2.25499	1.51086	87.178	3.41252	0	0	0	0	0	0	0	143	7.17	246	0	0
2	27	108	79	103	71	105.5	75	155	46	66	19.15	87	192.77	60	83.84	49.16	44.3	57.75	243	1.15	0.82	5.64	4	0.24	81.2	3	12.52	4.9	2	39.81	0	4.98629	0.651806	3.41593	1.2716	132.06	4.65364	0	0	0	0	0	0	0	156	9.96	245	0	0
1	55	134	85	130	79	132	82	173	65	77	21.72	78	158.25	69	87.17	44.35	74.8	65.72	267	0.96	0.76	43.09	4	0.75	341.6	4	18.98	359.1	4	30.39	0	4.09338	0.741761	2.60621	1.14718	100.756	4.83848	0	0	0	0	0	0	0	0	0	0	0	0
2	43	120	70	120	70	120	70	165	65	60	23.88	70	179.4	61	77.62	41.45	158.6	158.81	343	1.17	0.82	5.04	3	0.53	109.7	3	9.48	5.1	2	53.64	0	4.64046	1.79244	2.74671	1.07217	106.188	4.30839	0	0	0	0	0	0	0	171	7.61	251	0	0
1	29	128	75	99	55	113.5	65	165	64	76	23.51	78	191.45	89	78.77	55.91	73.2	92.77	392	1.47	0.81	2.39	1	0.29	176.2	2	18.81	5.3	3	40.93	0	4.95215	1.04707	3.02602	1.4462	116.986	4.37222	0	0	0	0	0	0	0	184	7.63	211	0	0
2	22	100	61	82	38	91	49.5	154	44	78	18.55	100	193.67	46	71.2	57.66	67.7	150.2	290	1.46	0.83	1.29	1	1.52	2	1	9.89	5.1	2	43.45	0	5.00957	1.69526	2.74108	1.49146	105.97	3.95204	0	0	0	0	0	0	0	103	7.94	244	0	0
2	77	157	77	153	71	155	74	142	39	67	19.34	86	200.74	67	93.25	54.48	130.3	101.01	234	1.28	0.82	3.5	2	0.63	107.2	3	26.66	4.9	2	44.65	0	5.19245	1.14007	3.26068	1.40921	126.058	5.17595	0	0	0	1	0	0	0	163	7.57	237	0	0
1	69	160	92	157	84	158.5	88	152	62	90	26.84	83	197.27	72	154.81	40.02	42.7	118.61	208	1.05	0.88	1.49	1	0.42	521.8	4	19.95	6.3	4	43.33	0	5.10269	1.33871	3.45391	1.03518	133.528	8.59292	1	0	0	1	1	0	0	178	9.65	294	0	0
1	26	101	58	102	65	101.5	61.5	165	51	69	18.73	69	133.23	68	73.6	43.22	241.9	71.28	370	1.12	0.59	5.23	3	0.26	317.1	4	22.55	5.7	3	26.75	0	3.4462	0.804515	1.95949	1.11795	75.754	4.08526	0	0	0	0	0	0	0	180	5.13	234	0	0
1	21	108	50	104	51	106	50.5	174	70	76	23.12	69	188.61	67	96.03	48.63	644.4	177.16	398	1.32	0.82	4.62	3	0.45	141.6	2	19.19	6.4	4	53.64	0	4.87869	1.99955	2.70429	1.25789	104.548	5.33026	0	0	0	0	0	0	0	176	5.91	274	0	0
1	42	111	54	101	59	106	56.5	159	57	75	22.55	79	191.87	111	83.8	55.14	117	58.03	389	1.26	0.81	6.22	4	0.18	176.8	2	15.37	6.8	4	34.48	0	4.96301	0.654966	3.23652	1.42628	125.124	4.65142	0	0	0	0	0	0	0	163	6.31	236	0	0
2	33	118	72	118	70	118	71	158	43	70	17.22	74	166.36	45	82.66	65.69	33.4	107.59	222	1.51	0.62	3.62	2	0.26	10.3	1	18.88	7.7	4	27.1	0	4.30316	1.21433	2.04739	1.69917	79.152	4.58814	0	0	0	0	0	0	0	137	7.45	223	0	0
1	28	121	64	110	61	115.5	62.5	167	64	73	22.95	70	151.59	77	90.5	46.38	294.7	66.46	265	1.05	0.7	2.11	1	0.31	321.7	4	18.98	5	2	27.66	0	3.92111	0.750113	2.3776	1.19969	91.918	5.02331	0	0	0	0	0	0	0	186	7.91	184	0	0
2	52	178	103	146	88	162	95.5	154	72	95	30.36	76	225.62	60	100.85	51.94	57.1	127.22	386	1.24	1.02	10.52	4	0.45	278.9	4	21.73	15.4	4	56.4	1	5.83601	1.43589	3.83435	1.34351	148.236	5.5978	1	0	0	1	0	0	0	172	7.6	227	0	0
1	23	121	68	113	62	117	65	166	51	64	18.51	64	177.17	84	78.35	54.64	45.9	81.47	407	1.37	0.76	4.01	2	0.15	333.6	4	17.43	5.5	3	39.53	0	4.58277	0.919526	2.74796	1.41335	106.236	4.34891	0	0	0	0	0	0	0	183	9.44	232	0	0
1	23	131	90	148	77	139.5	83.5	166	58	76	21.05	65	185.63	68	93.87	38.24	59.4	202.63	446	1.04	0.78	1.43	1	0.36	244.3	3	18.88	5.2	2	53.29	0	4.8016	2.28702	2.7642	0.989136	106.864	5.21037	0	1	0	0	0	0	0	170	10.39	237	0	0
2	38	114	67	114	67	114	67	169	57	74	19.96	74	141.89	64	85.33	59.38	55.9	52.29	205	1.28	0.57	5.55	4	0.16	7.9	1	13.4	4.6	1	21.41	0	3.6702	0.590181	1.86374	1.53595	72.052	4.73635	0	0	0	0	0	0	0	147	6.86	213	0	0
1	51	121	50	118	49	119.5	49.5	167	55	70	19.72	65	165.95	71	80.16	50	438.3	46.17	240	1.1	0.76	4.5	3	0.49	287.7	3	21.26	5.1	2	34.88	0	4.29255	0.521106	2.76037	1.29333	106.716	4.44938	0	0	0	0	0	0	0	169	7.97	257	0	0
2	61	208	95	209	104	208.5	99.5	146	66	86	30.96	74	205.87	101	88.21	44.61	62.6	122.59	393	1.17	0.92	3.43	2	0.42	210.4	4	21.39	5.7	3	58.01	1	5.32514	1.38363	3.53704	1.15391	136.742	4.8962	1	0	0	1	0	0	0	169	7.57	251	0	0
2	30	96	62	101	60	98.5	61	143	39	79	19.07	127	150.49	46	124.88	47.33	66.1	122.59	333	1.2	0.64	10.95	4	0.68	3.4	1	20.93	32.9	4	29.25	0	3.89265	1.38363	2.0342	1.22426	78.642	6.93162	0	0	0	0	0	0	0	104	12.68	296	0	0
1	72	117	83	120	75	118.5	79	170	56	93	19.38	84	195.06	97	88.98	43.32	72.2	127.59	482	1.15	0.9	16.14	4	0.85	80.2	1	35.11	6.7	4	45.25	0	5.04553	1.44007	3.26492	1.12054	126.222	4.93894	1	0	0	1	0	0	0	175	7.77	197	0	0
1	20	139	64	130	54	134.5	59	175	61	66	19.92	65	126.5	81	83.42	53.49	149.9	34.22	325	1.1	0.55	5.16	3	0.17	101.5	1	23.28	5.3	3	16.84	0	3.27212	0.38623	1.71148	1.3836	66.166	4.63033	0	0	0	0	0	0	0	169	5.47	207	0	0
1	22	110	82	129	66	119.5	74	168	58	68	20.55	72	171.14	58	85.05	48.87	568.7	140.66	357	1.18	0.73	3.98	2	0.65	304.2	4	12.75	4.9	2	42.01	0	4.4268	1.58758	2.43502	1.2641	94.138	4.7208	0	0	0	0	0	0	0	182	6.46	191	0	0
1	24	113	77	137	73	125	75	180	70	79	21.6	68	171.97	104	96.13	67.8	25.4	64.98	312	1.44	0.64	5.67	4	0.2	71.6	1	19.43	5.5	3	28.1	0	4.44827	0.733409	2.35835	1.75375	91.174	5.33581	0	0	0	0	0	0	0	163	7.88	211	0	0
1	18	107	50	107	54	107	52	167	51	63	18.29	64	132.6	67	95.64	49.9	688.4	61.37	321	1.05	0.6	5.91	4	0.27	83.2	1	14.88	4.4	1	24.5	0	3.4299	0.692664	1.82168	1.29074	70.426	5.30861	0	0	0	0	0	0	0	158	4.87	317	0	0
2	53	103	69	122	65	112.5	67	162	75	92	28.58	73	226.11	62	123.25	47.39	28.6	147.79	297	1.26	1.02	1.19	1	0.54	304.2	4	17.71	8.6	4	55.93	1	5.84868	1.66806	3.8583	1.22581	149.162	6.84114	1	0	0	1	0	0	0	164	5.71	257	0	0
1	29	132	52	111	49	121.5	50.5	173	65	77	21.72	0	123.8	61	84.67	45.51	36.6	31.17	295	0.98	0.56	5.43	4	0.17	287.7	3	11.45	4.5	1	21.68	0	3.20228	0.351806	1.86384	1.17719	72.056	4.69971	0	0	0	0	0	0	0	168	7.12	156	0	0
1	53	109	62	106	58	107.5	60	184	62	70	18.31	71	144.45	78	83.07	48.51	8.1	58.02	341	1.2	0.59	4.5	3	0.17	318.4	4	19.05	4.8	2	15.31	0	3.73642	0.654853	2.18148	1.25479	84.336	4.6109	0	0	0	0	0	0	0	171	6.31	148	0	0
2	46	115	70	117	72	116	71	166	67	89	24.31	71	204.96	62	79.46	55.92	58.4	75.16	348	1.39	0.77	2.67	1	0.51	107.2	3	19.47	6	3	39.28	0	5.3016	0.848307	3.46632	1.44646	134.008	4.41052	1	0	0	1	0	0	0	158	7.16	245	0	0
1	63	161	83	149	83	155	83	177	95	105	30.32	69	187.84	71	102.24	39.84	65.8	136.94	430	1.15	0.77	5.75	4	0.61	70.1	1	18.56	7.5	4	40.44	0	4.85877	1.5456	3.11981	1.03052	120.612	5.67496	0	1	0	1	0	0	0	178	8.16	256	0	0
2	76	0	0	0	0	0	0	152	41.8	60	18.09	0	235.45	57	76.19	55.2	46.2	99.15	296	1.45	0.9	5.31	3	0.66	211.6	4	19.4	4.6	1	46.61	0	6.09027	1.11907	4.14951	1.42783	160.42	4.22902	0	1	0	0	0	0	0	163	5.77	166	0	1
1	78	160	101	173	108	166.5	104.5	169	58	87	20.31	80	191.72	86	80.92	42.03	102.6	99.15	423	1.12	0.82	18.34	4	0.91	183.4	2	28.46	15.1	4	45.08	0	4.95913	1.11907	3.35903	1.08717	129.86	4.49156	1	0	0	1	0	0	0	181	7.95	201	0	0
2	68	155	93	154	99	154.5	96	158	70	80	28.04	80	212.3	73	101.3	42.66	102	183.17	324	1.19	0.86	6.7	4	0.53	333.6	4	18.14	10.9	4	55.57	1	5.49146	2.06738	3.4404	1.10347	133.006	5.62278	1	0	0	1	0	0	0	164	7.27	259	0	0
2	28	111	67	106	68	108.5	67.5	166	54	60	19.6	90	128.57	61	79.91	36.04	249.9	71.64	244	0.98	0.63	5.86	4	0.18	2.9	1	12.4	4.7	1	31.94	0	3.32566	0.808578	2.02281	0.93223	78.202	4.4355	0	1	0	0	0	0	0	97	4.53	228	0	0
1	37	121	73	115	74	118	73.5	167	54	70	19.36	90	156.65	82	81.58	54.56	63.2	40.79	291	1.22	0.67	8.89	4	0.19	177.3	2	21.86	27.8	4	28.96	0	4.05199	0.460384	2.42969	1.41128	93.932	4.5282	0	0	0	0	0	0	0	173	13.21	268	0	0
2	40	147	76	134	80	140.5	78	156	39.8	60	16.35	77	155.88	66	76.82	67.12	226.7	69.5	268	1.51	0.55	5.05	3	0.08	202.4	4	13.73	5.3	2	24.07	0	4.03207	0.784424	1.93637	1.73616	74.86	4.26399	0	0	0	1	0	0	0	152	5.65	274	0	0
2	75	140	89	145	77	142.5	83	137	39	89	20.78	104	220.34	61	97.24	44.32	57.8	105.08	221	1.1	0.99	2.79	1	1.08	104.1	3	30.64	7.6	4	61.15	1	5.69943	1.186	4.00942	1.1464	155.004	5.39742	0	0	0	1	0	0	0	163	5.62	233	0	0
2	32	124	81	119	76	121.5	78.5	160	58	77	22.66	97	148.54	55	87.72	65.88	36	39.22	251	1.32	0.56	6.37	4	0.38	7.4	1	14.28	11.8	4	19.33	0	3.84221	0.442664	1.93523	1.70409	74.816	4.86901	0	0	0	0	0	0	0	99	4.98	271	0	0
1	36	119	75	116	74	117.5	74.5	177	64	73	20.43	87	139.6	87	109.18	31.98	164.6	102.95	348	1	0.67	4.14	2	0.2	219	3	17.32	4.6	1	39.91	0	3.61097	1.16196	2.25116	0.827212	87.03	6.06017	0	1	0	0	0	0	0	185	5.07	157	0	0
2	22	103	58	98	55	100.5	56.5	161	51	65	19.68	75	126.98	54	73.97	47.84	34.4	31.34	222	1.02	0.54	3.92	2	0.33	14.7	2	9.63	5	2	18.31	0	3.28453	0.353725	1.88495	1.23745	72.872	4.10579	0	0	0	0	0	0	0	144	7.14	344	0	0
1	19	109	59	109	63	109	61	183	53	65	15.83	64	148.19	70	84.53	55.68	268.3	69.87	391	1.38	0.59	5.76	4	0.09	0.5	1	19.12	4.9	2	30.37	0	3.83316	0.7886	2.03145	1.44025	78.536	4.69194	0	0	0	0	0	0	0	0	0	0	0	0
1	19	117	66	107	61	112	63.5	176	55	71	17.76	65	173.56	86	80.95	47.38	37.9	115.27	370	1.23	0.6	5.37	4	0.17	48.2	1	22.52	4.5	1	46.99	0	4.48939	1.30102	2.66751	1.22556	103.126	4.49323	0	0	0	0	0	0	0	184	8.11	231	0	0
1	44	135	80	130	79	132.5	79.5	172	64	77	21.63	67	225.41	43	91.96	125.96	136.9	56.72	424	2.2	0.59	1.87	1	1.1	61.2	1	30.75	6.1	3	26.32	0	5.83057	0.640181	2.279	3.25815	88.106	5.10435	0	0	0	0	0	0	0	177	7.47	126	0	0
2	53	136	72	130	68	133	70	161	66	97	25.46	97	136.13	55	88.11	42.63	43.4	80.16	315	1.11	0.6	6.1	4	0.17	59.7	3	19.74	5.2	2	27.86	0	3.52121	0.90474	2.00383	1.10269	77.468	4.89065	0	0	0	0	0	0	0	171	5.62	149	0	0
2	27	128	59	120	57	124	58	163	48	63	18.07	74	125.39	62	80.22	49.3	112.5	32.55	272	1.05	0.54	4.68	3	0.01	22.6	2	15.27	5.3	2	17.7	0	3.2434	0.367381	1.79979	1.27522	69.58	4.45271	0	0	0	0	0	0	0	139	6.83	252	0	0
2	59	173	101	177	101	175	101	156	73	100	30	99	168.64	58	107.93	42.52	30.9	128.98	399	1.2	0.71	0.1	1	0.36	289.6	4	22.59	5.6	3	42.83	0	4.36213	1.45576	2.59503	1.09984	100.324	5.99079	0	0	0	1	0	0	0	168	7.76	251	0	0
2	34	131	49	112	57	121.5	53	170	58	70	20.07	69	164.48	73	99.84	61.23	119.2	60.43	193	1.47	0.67	5.71	4	0.16	8.8	1	12.05	4.9	2	25.77	0	4.25453	0.682054	2.3581	1.58381	91.164	5.54174	0	0	0	0	0	0	0	133	5.91	207	0	0
1	57	124	79	121	80	122.5	79.5	175	91	81	29.71	67	214.73	68	99.46	47.83	119.2	144.63	343	1.2	0.96	4.09	2	0.41	282.7	3	15.12	9.7	4	53.08	0	5.55432	1.63239	3.56891	1.2372	137.974	5.52065	0	0	0	0	0	0	0	173	6.45	192	0	0
1	35	114	72	110	70	112	71	180	64.7	74	19.97	70	154.85	94	89.67	37.02	176.4	97.67	344	1.06	0.75	5.54	4	0.29	142.7	2	16.6	4.5	1	44.66	0	4.00543	1.10237	2.54258	0.957579	98.296	4.97724	0	1	0	0	0	0	0	173	7.29	203	0	0
2	48	162	70	157	73	159.5	71.5	163	89	105	33.5	87	165.93	48	104.29	42.37	124	102.67	367	1.08	0.75	2.7	1	0.6	6.4	1	13.37	5.5	3	45.56	0	4.29203	1.1588	2.66492	1.09596	103.026	5.78874	1	0	0	1	0	0	0	116	4.71	226	0	0
2	48	108	74	111	73	109.5	73.5	165	55	72	20.2	70	218.89	57	90.47	62.64	63.5	136.29	311	1.51	0.85	3.29	2	0.42	174.6	4	15.62	6.2	3	49.38	0	5.66192	1.53826	3.33658	1.62028	128.992	5.02165	0	0	0	0	0	0	0	143	7.14	180	0	0
2	27	116	76	116	75	116	75.5	159	39	55	15.43	111	115.68	54	90.47	41.72	168	42.65	302	0.98	0.55	9.24	4	1.02	11.3	1	11.36	43.9	4	21.94	0	2.99224	0.481377	1.69245	1.07915	65.43	5.02165	0	0	0	0	0	0	0	141	10.69	242	0	0
2	20	106	71	99	46	102.5	58.5	169	51	59	17.86	97	109.65	66	84.46	49.14	91.4	33.66	239	1.06	0.48	5.08	3	0.2	58.2	3	15.12	4.7	1	16.87	0	2.83626	0.37991	1.39105	1.27108	53.778	4.68806	0	0	0	0	0	0	0	155	7.47	296	0	0
2	45	125	49	112	65	118.5	57	148	64	84	29.22	67	198.65	44	114.56	36.05	13.9	252.55	403	1.1	0.91	6.55	4	0.33	257.5	4	13.94	6.6	3	69.49	1	5.13839	2.85045	2.89938	0.932488	112.09	6.35879	0	1	0	0	0	0	0	154	7.96	211	0	0
1	57	157	95	151	82	154	88.5	180	86	90	26.54	69	193.18	71	100.22	46.32	43.4	86.56	356	1.15	0.87	1.65	1	0.27	240.1	3	21.09	6.1	3	47.49	0	4.9969	0.976975	3.35096	1.19814	129.548	5.56283	0	0	0	1	0	0	0	183	8.26	225	0	0
2	44	114	70	107	70	110.5	70	152	61	85	26.4	74	135.16	41	92.13	44.26	38.6	53.2	253	1.05	0.63	2.19	1	0.33	14.2	2	14.04	5.6	3	28.55	0	3.49612	0.600451	2.07605	1.14485	80.26	5.11379	0	0	0	0	0	0	0	128	6.72	366	0	0
2	56	160	92	157	96	158.5	94	162	57	75	21.72	69	182.36	66	94.04	56.3	55.2	72.66	277	1.3	0.76	2.26	1	0.27	74.7	3	19.95	8.6	4	39.07	0	4.71702	0.82009	2.88484	1.45629	111.528	5.2198	1	0	0	1	0	0	0	162	9.07	208	0	0
1	29	125	78	114	75	119.5	76.5	172	52.5	70	17.75	86	162.88	68	92.55	45.99	44	117.12	307	1.22	0.74	5.67	4	0.11	237.1	3	14.98	5.4	3	40.87	0	4.21314	1.3219	2.41764	1.1896	93.466	5.1371	0	0	0	0	0	0	0	158	6.71	239	0	0
1	22	97	63	95	65	96	64	173	54	68	18.04	87	147.84	79	85.05	40.14	56.8	126.57	392	1.11	0.6	5.44	4	0.23	87.8	1	31.6	4.7	1	37.29	0	3.82411	1.42856	2.13104	1.03828	82.386	4.7208	0	0	0	0	0	0	0	166	6.85	187	0	0
2	31	146	92	139	86	142.5	89	169	47	62	16.46	54	154.64	62	91.66	39.74	153.3	83.56	292	1.05	0.69	8.93	4	0.26	5.4	1	13.73	20.3	4	25.89	0	4	0.943115	2.53978	1.02794	98.188	5.0877	0	1	0	1	0	0	0	124	5.18	278	0	0
2	48	0	0	0	0	0	0	160	53	80	20.7	0	208.49	47	98.36	32.88	72.2	356.82	239	1.12	0.78	4.02	2	0.31	142.2	4	20.12	5.3	2	60.16	1	5.39291	4.02731	2.69648	0.850491	104.246	5.45959	0	1	0	0	0	0	0	151	8.06	248	0	0
1	45	116	68	112	73	114	70.5	150	34.1	58	15.16	81	163.02	61	76.34	35.35	63.9	105.6	222	1.03	0.78	5.84	4	0.22	78.2	1	21.23	4.3	1	40.08	0	4.21676	1.19187	2.75608	0.914382	106.55	4.23734	1	1	0	1	0	0	0	167	7.73	232	0	0
2	52	164	88	148	90	156	89	156	58	86	23.83	72	208.08	65	107.73	41.96	115	167.48	278	1.33	0.82	0.49	1	0.38	163.6	4	17.61	5.9	3	43.58	0	5.38231	1.89029	3.43052	1.08536	132.624	5.97968	1	0	0	1	0	0	0	149	7.96	338	0	0
1	51	137	70	133	75	135	72.5	177	77	94	24.58	67	241.63	79	102.98	21.14	362	456.22	494	0.91	0.99	3.27	2	0.49	536.5	4	22.22	4.7	1	66.78	1	6.25013	5.14921	3.34315	0.546818	129.246	5.71603	0	1	0	0	0	0	0	177	7.51	228	1	0
1	76	171	82	160	82	165.5	82	173	85	109	28.4	78	109.79	92	127.46	33.06	114.4	100.23	340	1.01	0.56	6.29	4	0.4	16.2	1	14.49	6.2	3	19.5	0	2.83989	1.13126	1.46622	0.855147	56.684	7.07482	0	1	0	1	1	0	0	140	6.67	220	0	0
2	68	195	100	195	96	195	98	156	62.9	97	25.85	68	121.02	62	105.34	34.91	20.9	62.43	358	1.04	0.6	4.93	3	0.24	285.2	4	24.06	4.8	1	27.35	0	3.13037	0.704628	1.9044	0.903001	73.624	5.84702	1	1	0	1	0	0	0	181	6.13	129	0	0
1	55	116	69	111	68	113.5	68.5	180	76	80	23.46	76	187.21	78	92.7	45.14	393	62.16	417	1.17	0.82	3.26	2	0.1	285.8	3	21.23	6.6	4	42.8	0	4.84247	0.70158	3.35329	1.16762	129.638	5.14543	0	0	0	0	0	0	0	164	5.4	194	0	0
2	32	128	60	108	67	118	63.5	160	52	67	20.31	69	131.35	41	84.26	47.64	13.9	45.76	235	1.21	0.55	5.36	3	0.15	14.7	2	14.25	4.7	1	17.38	0	3.39757	0.516479	1.92856	1.23228	74.558	4.67695	0	0	0	0	0	0	0	151	6.55	244	0	0
2	24	104	53	102	55	103	54	153	50	67	21.36	52	114.71	57	71.66	37.02	38.2	48.63	250	0.97	0.53	2.78	1	0.25	79.2	3	8.58	41.9	4	16.8	0	2.96715	0.548871	1.75799	0.957579	67.964	3.97758	0	1	0	0	0	0	0	150	6.2	228	0	0
2	23	113	71	110	59	111.5	65	0	0	0	20	81	138.35	65	73.78	54.46	398.9	33.63	263	1.17	0.55	5.4	3	0.38	21.1	2	13.4	5.2	2	16.61	0	3.57863	0.379571	1.99596	1.40869	77.164	4.09525	0	0	0	0	0	0	0	155	6.59	209	0	0
1	67	104	61	98	58	101	59.5	0	0	0	20	69	221.67	74	94.16	67.66	376.1	76.61	287	1.51	0.88	3.85	2	0.14	267.2	3	21.33	5.2	2	43.84	0	5.73383	0.864673	3.58738	1.75013	138.688	5.22647	0	0	0	0	0	0	0	192	5.53	229	0	0
1	56	0	0	0	0	0	0	160	51	84	19.92	0	193.04	87	96.38	60.71	61.9	54.2	96	1.55	0.78	1.53	1	0.23	268.4	3	18.6	5.1	2	33.76	0	4.99327	0.611738	3.14252	1.57036	121.49	5.34969	0	0	0	0	0	0	0	169	4.75	168	0	0
2	46	0	0	0	0	0	0	158	50	70	20.03	0	198.1	62	104.68	53.67	38.6	73.37	263	1.34	0.82	5.36	3	0.21	7.4	1	17.17	4.8	1	36.03	0	5.12416	0.828104	3.35634	1.38826	129.756	5.81039	0	0	0	0	0	0	0	146	5.95	237	0	0
1	61	123	72	132	65	127.5	68.5	161	61	82	23.53	50	202.81	74	92.18	45.3	25.7	51.6	326	1.24	0.88	4.52	3	0.31	339.6	4	20.93	5.2	2	45.95	0	5.24599	0.582393	3.80729	1.17175	147.19	5.11656	0	0	0	0	0	0	0	181	4.61	217	0	0
1	35	155	77	127	65	141	71	178	63	80	19.88	79	143.2	85	89.44	40.45	293.8	75.69	323	1.11	0.66	5	3	0.33	391.5	4	19.81	4.5	1	30.06	0	3.70409	0.854289	2.26622	1.0463	87.612	4.96448	0	0	0	1	0	0	0	162	5.38	293	0	0
1	42	128	70	136	73	132	71.5	172	66	85	22.31	77	123.1	65	90.86	42.18	335.2	48.36	251	1.07	0.59	2.32	1	0.24	455.8	4	16.78	6.5	4	21.36	0	3.18417	0.545824	1.84294	1.09105	71.248	5.04329	0	0	0	0	0	0	0	173	9.97	215	0	0
1	33	137	86	129	83	133	84.5	170	58	72	20.07	69	147.64	83	87.66	36.35	55.5	59.2	354	1.09	0.67	2.51	1	0.12	166.9	2	20.05	5.6	3	29.75	0	3.81893	0.668172	2.57243	0.940248	99.45	4.86567	0	1	0	0	0	0	0	177	7.34	239	0	0
2	51	111	67	115	69	113	68	171	83	99	28.38	60	201.29	66	89.4	49.86	33.4	121.82	213	1.31	0.85	1.99	1	0.54	4.4	1	18.07	8.5	4	50.74	0	5.20667	1.37494	3.28676	1.28971	127.066	4.96226	0	0	0	0	0	0	0	94	3.94	264	0	0
1	49	116	74	116	67	116	70.5	160	58	76	22.66	66	167.18	59	85.86	47.18	34.1	83.84	309	1.18	0.71	0.6	1	0.14	92.3	1	19.02	4.8	2	33.28	0	4.32437	0.946275	2.67025	1.22038	103.232	4.76576	0	0	0	0	0	0	0	199	8.61	211	0	0
1	40	108	57	102	52	105	54.5	165	55	83	20.2	60	127.19	65	83.74	53.89	33.8	54.01	288	1.21	0.51	5.17	3	0.28	142.2	2	14.7	4.8	2	17.12	0	3.28996	0.609594	1.61661	1.39395	62.498	4.64809	0	0	0	0	0	0	0	166	7.54	236	0	0
1	72	186	66	177	46	181.5	56	167	58	84	20.8	79	217.79	75	110.51	53.77	127.8	66.33	378	1.45	1	5.05	3	0.29	122.2	1	18.95	4.7	1	51.03	0	5.63347	0.748646	3.89948	1.39084	150.754	6.13399	0	0	0	1	0	0	0	185	9.16	301	0	0
1	64	0	0	0	0	0	0	166	55	84	19.96	0	195.74	68	85.17	78.18	452.4	39.28	351	1.59	0.69	3.02	2	0.24	250.2	3	17.68	4.5	1	27.43	0	5.06311	0.443341	2.83766	2.02225	109.704	4.72746	0	0	0	0	0	0	0	153	4.7	255	0	0
1	36	132	74	111	71	121.5	72.5	185	68	86	19.87	58	157.34	76	96.17	71.92	145.5	52.62	471	1.66	0.56	5.48	4	0.2	103.6	1	19.81	5	2	19.75	0	4.06984	0.593905	1.9373	1.86032	74.896	5.33803	0	0	0	0	0	0	0	173	6.61	208	0	0
1	48	0	0	0	0	0	0	164	66	88	24.54	0	190.68	83	89.44	46.43	101.3	83.19	377	1.14	0.82	3.96	2	0.41	506.6	4	14.59	7.4	4	38.28	0	4.93223	0.938939	3.30088	1.20098	127.612	4.96448	0	0	0	0	0	0	0	162	9.65	208	0	0
1	78	168	87	162	83	165	85	162	67	94	25.53	71	204.41	76	98.43	51.03	37.3	101.26	467	1.38	0.9	3.71	2	0.25	338.9	4	19.84	4.6	1	53.83	0	5.28738	1.14289	3.44356	1.31997	133.128	5.46348	1	0	0	1	0	0	0	198	7.79	65	0	0
2	49	0	0	0	0	0	0	171	77	89	26.33	0	198.65	51	90.51	68.77	469.8	86.43	318	1.58	0.71	2.91	2	0.31	73.7	3	20.89	11.3	4	34.06	0	5.13839	0.975508	2.91242	1.77884	112.594	5.02387	0	0	0	0	0	0	0	173	4.25	237	0	0
1	51	130	79	126	78	128	78.5	174	85	107	28.08	60	290.98	85	100.79	41.97	99.1	240.76	490	1.36	1.35	1.6	1	0.23	193.4	2	20.22	5.2	2	93.14	1	7.52664	2.71738	5.1955	1.08562	200.858	5.59447	1	1	0	1	0	0	0	184	7.21	279	1	1
1	45	0	0	0	0	0	0	178	70	94	22.09	0	123.86	81	95.27	48.68	124	56.7	380	1.14	0.52	3.97	2	0.22	136.9	2	19.74	4.4	1	16.12	0	3.20383	0.639955	1.65132	1.25918	63.84	5.28808	0	0	0	0	0	0	0	219	9.25	191	0	0
2	44	0	0	0	0	0	0	158	48	72	19.23	0	142.51	55	87.46	58.72	78	55.12	174	1.39	0.5	5.55	4	0.24	1	1	15.59	5.2	2	20.73	0	3.68624	0.622122	1.8822	1.51888	72.766	4.85457	0	0	0	0	0	0	0	873	5.92	356	0	0
1	24	137	66	120	70	128.5	68	172	67	78	22.65	60	121.92	64	71.2	45.34	67.4	72.78	396	1.11	0.54	6.74	4	0.1	106.1	1	13.37	6.3	4	18.54	0	3.15365	0.821445	1.60435	1.17279	62.024	3.95204	0	0	0	0	0	0	0	162	7.61	157	0	0
1	36	122	51	129	58	125.5	54.5	178	82	86	25.88	51	143.76	82	86.96	39.15	10.7	37.21	349	0.95	0.65	3.1	2	0.24	187.8	2	18.77	4.6	1	19.62	0	3.71857	0.419977	2.5134	1.01267	97.168	4.82682	0	1	0	0	0	0	0	161	5.66	225	0	0
2	34	143	81	124	80	133.5	80.5	177	75	77	23.94	85	151.72	42	84.22	51.84	53	38.97	260	1.22	0.63	5.51	4	0.28	9.8	1	14.32	4.9	2	22.33	0	3.92447	0.439842	2.38195	1.34092	92.086	4.67473	0	0	0	0	0	0	0	151	7.66	251	0	0
1	18	119	72	119	78	119	75	167	57	66	20.44	61	138.21	64	71.61	36.98	214.2	115.66	393	1.08	0.62	5.74	4	0.36	181.2	2	20.45	4.4	1	25.51	0	3.57501	1.30542	2.02012	0.956544	78.098	3.9748	0	1	0	0	0	0	0	168	7.09	344	0	0
1	22	123	52	106	59	114.5	55.5	171	63	72	21.55	0	138.42	79	69.84	43.48	343.1	43.32	319	1.08	0.61	5.2	3	0.26	83.2	1	23.87	4.3	1	19.92	0	3.58044	0.488939	2.23166	1.12468	86.276	3.87655	0	0	0	0	0	0	0	169	7.51	194	0	0
2	27	123	79	117	74	120	76.5	164	50	66	18.59	94	121.78	59	79.81	49.9	97.2	31.18	259	1.07	0.49	5.64	4	0.15	12.3	2	19.09	4.7	1	12.95	0	3.15003	0.351919	1.69798	1.29074	65.644	4.42995	0	0	0	0	0	0	0	145	9.48	307	0	0
2	52	124	73	124	75	124	74	150	51	76	22.67	69	156.86	60	81.86	38.99	412.3	80.56	231	1.07	0.7	2.74	1	0.42	71.6	3	22.85	5.3	2	29.51	0	4.05742	0.909255	2.63213	1.00854	101.758	4.54374	1	1	0	1	0	0	0	154	6.44	243	0	0
1	26	109	66	108	68	108.5	67	176	62	71	20.02	59	172.87	63	73.18	54.55	29.6	59.71	380	1.26	0.7	5.09	3	0.22	191.7	2	23.8	4.8	2	29.42	0	4.47155	0.673928	2.75163	1.41102	106.378	4.06194	0	0	0	0	0	0	0	166	5.56	241	0	0
2	29	106	60	101	67	103.5	63.5	157	43	62	17.44	88	152.35	58	69.36	71.63	58.1	62.4	247	1.65	0.54	4.72	3	0.29	12.3	2	14.8	5.2	2	19.2	0	3.94077	0.704289	1.76513	1.85282	68.24	3.84991	0	0	0	0	0	0	0	145	9.78	271	0	0
2	66	135	61	116	61	125.5	61	157	50	73	20.28	91	205.79	58	68.56	63.62	145.1	74.72	260	1.61	0.82	3.65	2	0.75	84.2	3	15.44	9.1	4	33.24	0	5.32307	0.843341	3.29089	1.64563	127.226	3.80551	0	0	0	0	0	0	0	163	4.95	161	0	0
2	72	127	71	128	73	127.5	72	153	54	87	23.07	83	190.75	65	73.18	62.11	34.1	50.54	165	1.46	0.73	3.47	2	0.61	191.7	4	21.23	4.9	2	27.68	0	4.93404	0.570429	3.06601	1.60657	118.532	4.06194	0	0	0	0	0	0	0	145	4.33	268	0	0
1	40	109	68	108	68	108.5	68	169	57	74	19.96	72	130.79	61	83.18	39.82	38.6	89.54	281	1.05	0.57	5.4	4	0.38	214.4	3	13.17	4.4	1	24.94	0	3.38308	1.01061	1.88986	1.03001	73.062	4.61701	0	1	0	0	0	0	0	167	5.51	207	0	0
1	41	122	74	121	77	121.5	75.5	170	53.5	72	18.51	65	159.08	60	92.24	48.71	543.8	46.38	310	1.16	0.68	4.92	3	0.38	241.3	3	14.77	4.9	2	27.28	0	4.11485	0.523476	2.61495	1.25996	101.094	5.11989	0	0	0	0	0	0	0	174	5.87	206	0	0
1	44	135	85	135	80	135	82.5	0	0	0	20	70	116.86	69	76.86	28.88	50.1	92.51	271	0.85	0.56	1.01	1	0.57	203	3	33.64	5.2	2	23.53	0	3.02276	1.04413	1.79715	0.747025	69.478	4.26621	0	1	0	0	0	0	0	184	8.84	299	0	0
1	19	109	56	89	45	99	50.5	174	64	73	21.14	62	109.45	83	61.75	46	28.6	55.82	262	1.08	0.45	4.18	2	0.2	93.3	1	17.28	4.8	2	13.71	0	2.83109	0.630023	1.35246	1.18986	52.286	3.42751	0	0	0	0	0	0	0	174	7.76	174	0	0
1	21	114	65	110	66	112	65.5	170	51	66	17.65	62	117.14	68	79.71	45.92	261.5	45.73	353	0.94	0.5	5.31	3	0.13	111.8	1	17.46	4.7	1	14.19	0	3.03001	0.51614	1.60564	1.18779	62.074	4.4244	0	0	0	0	0	0	0	159	4.87	209	0	0
1	24	113	61	109	60	111	60.5	170	59	71	20.42	69	101.54	60	76.96	38.57	50.4	35.35	338	0.86	0.47	1.47	1	0.1	125.3	1	63.23	4.6	1	12.98	0	2.62649	0.398984	1.44594	0.997672	55.9	4.27176	0	1	0	0	0	0	0	175	5.75	227	0	0
2	24	107	66	107	67	107	66.5	0	0	0	20	78	160.32	54	77.93	50.3	30.2	61.94	237	1.19	0.7	5.72	4	0.36	1.5	1	12.97	5.8	3	30.56	0	4.14692	0.699097	2.5254	1.30109	97.632	4.3256	0	0	0	0	0	0	0	133	10.26	267	0	0
2	46	115	70	109	66	112	68	152	44	63	19.04	103	203.37	44	543.98	63.33	341.2	68.98	200	1.36	0.89	5.17	3	0.59	11.3	1	10.24	4.5	1	41.02	0	5.26048	0.778555	3.26549	1.63813	126.244	30.1943	0	0	1	0	1	0	0	122	7.61	373	0	0
1	57	162	88	157	86	159.5	87	170	61	81	21.11	67	201.91	91	81.16	53.15	306.8	68.7	315	1.31	0.87	5.44	4	0.36	526.1	4	18.84	5	2	38.14	0	5.22271	0.775395	3.4925	1.37481	135.02	4.50488	0	0	0	1	0	0	0	161	11.59	300	0	0
2	30	118	74	114	77	116	75.5	159	62	75	24.52	81	139.25	56	76.89	55.16	47.9	78.34	273	1.25	0.5	4.64	3	0.33	102.5	3	13.43	5.2	2	18.5	0	3.60191	0.884199	1.76984	1.4268	68.422	4.26787	0	0	0	0	0	0	0	152	8.56	283	0	0
1	79	149	75	153	72	151	73.5	161	73	100	28.16	60	183.75	77	140.19	38.41	389.9	102.33	307	1.05	0.87	0.98	1	0.62	230.7	3	20.89	5.9	3	40.01	0	4.75297	1.15497	3.23006	0.993533	124.874	7.78142	1	1	1	1	1	0	0	171	6.33	243	0	0
2	54	160	92	146	90	153	91	161	78	100	30.09	70	181.33	41	80.12	30.27	59.4	161.24	220	0.98	0.89	3.18	2	0.43	504.9	4	13.27	5	2	54.45	1	4.69038	1.81986	3.07325	0.78298	118.812	4.44716	1	1	0	1	0	0	0	171	11.44	300	0	0
2	35	118	67	103	67	110.5	67	168	54	73	19.13	66	173.91	58	82.93	62.55	46.9	55.36	291	1.42	0.65	5.78	4	0.31	7.9	1	15.87	4.8	1	24.88	0	4.49845	0.624831	2.5941	1.61795	100.288	4.60313	0	0	0	0	0	0	0	139	6.06	244	0	0
2	61	118	71	116	76	117	73.5	153	49	94	20.93	77	203.71	37	90.99	61.35	81.5	99.92	220	1.58	0.78	4.37	2	0.29	211.6	4	16.27	5.6	3	37.92	0	5.26927	1.12777	3.16544	1.58691	122.376	5.05051	0	0	0	0	0	0	0	170	5.74	219	0	0
1	29	127	74	128	77	127.5	75.5	0	0	0	20	78	150.76	55	80.54	33.82	29.9	189.86	256	1	0.61	3.75	2	0.25	236	3	21.36	4.4	1	38.2	0	3.89964	2.14289	2.04263	0.874806	78.968	4.47047	0	1	0	0	0	0	0	180	8.17	241	0	0
2	35	129	71	113	67	121	69	164	58	73	21.56	82	147.36	62	76.27	43.94	75.7	36.93	227	1	0.65	5.45	4	0.36	7.9	1	12.02	5	2	21.9	0	3.81169	0.416817	2.48407	1.13658	96.034	4.23346	0	0	0	0	0	0	0	104	5.96	193	0	0
2	40	142	93	136	93	139	93	165	76.3	86	28.03	90	164.14	50	88.84	28.27	34.7	193.57	410	0.87	0.75	4.5	2	0.75	283.9	4	11.84	4.8	1	48.46	0	4.24573	2.18476	2.51309	0.731247	97.156	4.93117	0	1	0	1	0	0	0	160	9.27	237	0	0
2	58	218	130	223	123	220.5	126.5	165	57	78	20.94	86	161.43	63	89.95	42.54	400.9	81.49	287	1.14	0.71	1.24	1	0.26	52.2	3	15.3	7.4	4	36.95	0	4.17563	0.919752	2.6537	1.10036	102.592	4.99278	1	0	0	1	0	0	0	176	9.58	232	0	0
2	36	138	82	129	89	133.5	85.5	165	89	80	32.69	99	185.35	46	88.39	34.61	14.2	275.18	315	1.09	0.75	0.78	1	0.33	124.3	4	12.46	5.1	2	55.16	1	4.79436	3.10587	2.47553	0.895241	95.704	4.90619	0	1	0	0	0	0	0	167	10.58	302	0	0
1	22	111	71	106	69	108.5	70	175	60	70	19.59	70	140.64	64	77.17	47.42	28.6	69.26	341	1.2	0.55	5.74	4	0.32	183.4	2	19.98	4.3	1	21.53	0	3.63787	0.781716	2.05297	1.22659	79.368	4.28341	0	0	0	0	0	0	0	180	6.61	179	0	0
2	49	169	94	155	103	162	98.5	164	114	125	42.39	87	165.8	60	75.71	45.55	0	101.49	315	1.18	0.69	7.39	4	0.64	87.8	3	17.61	7.4	4	28.77	0	4.28867	1.14549	2.58541	1.17822	99.952	4.20238	0	0	0	1	0	0	0	162	8.37	256	0	0
1	68	141	84	128	88	134.5	86	156	49	73	20.13	64	155.61	59	76.03	44.04	0	310.11	308	1.06	0.7	2.26	1	0.71	61.2	1	23.28	8.4	4	27.21	0	4.02509	3.50011	1.28163	1.13916	49.548	4.22014	0	1	0	0	0	0	0	161	4.44	185	0	0
2	58	115	61	115	71	115	66	145	57	75	27.11	73	250.57	44	81.55	51.54	0	133.73	319	1.4	1.06	4.13	2	0.4	585.9	4	13.6	5.1	2	60.2	1	6.48138	1.50937	4.45639	1.33316	172.284	4.52653	0	1	0	0	0	0	0	157	5.71	197	1	1
1	28	123	69	117	67	120	68	176	78	93	25.18	78	197.55	65	65.51	47.78	0	98.72	366	1.24	0.9	4.4	3	0.41	195.7	2	22.45	8.9	4	45.23	0	5.10993	1.11422	3.36332	1.2359	130.026	3.63621	0	0	0	0	0	0	0	181	8.01	192	0	0
1	38	131	77	108	67	119.5	72	177	63	79	20.11	61	140.16	79	87	49.82	0	53.51	319	1.12	0.61	5.76	4	0.19	53.7	1	26.86	4.6	1	22.06	0	3.62545	0.60395	2.05996	1.28867	79.638	4.82904	0	0	0	0	0	0	0	162	7.33	304	0	0
1	39	116	68	122	69	119	68.5	152	50	71	21.64	81	179.16	66	64.57	45.76	0	267.12	314	1.13	0.76	5.13	3	0.41	371.7	4	15.44	4.9	2	30.77	0	4.63425	3.0149	2.0687	1.18365	79.976	3.58404	0	1	0	0	0	0	0	180	5.84	197	0	0
2	27	77	45	84	38	80.5	41.5	155	36	59	14.98	52	169.75	58	55.12	69.79	0	41.93	284	1.48	0.62	5.84	4	0.19	18.7	2	11.93	4.5	1	23.17	0	4.39084	0.473251	2.3687	1.80523	91.574	3.0595	0	0	0	0	0	0	0	155	5.56	191	0	0
2	69	128	73	114	88	121	80.5	150	52	94	23.11	80	176.83	66	88.94	38.96	0	407.46	288	1.13	0.78	5.29	3	0.47	264.8	4	20.83	4.5	1	46.89	0	4.57398	4.59887	1.4583	1.00776	56.378	4.93672	0	1	0	0	0	0	0	158	6.37	191	0	0
2	20	120	80	120	70	120	75	151	51	69	22.37	0	147.85	61	83.46	67.07	0	80.19	236	1.4	0.58	5.72	4	0.22	7.4	1	12.62	5	2	21	0	3.82437	0.905079	1.67465	1.73487	64.742	4.63255	0	0	0	0	0	0	0	161	10.04	213	0	0
2	35	129	82	121	81	125	81.5	157	38	59	15.42	85	162.13	53	70.23	63.01	0	54.72	281	1.34	0.65	5.71	4	0.24	29.5	2	12.91	4.9	2	24.81	0	4.19374	0.617607	2.28081	1.62985	88.176	3.8982	0	0	0	0	0	0	0	158	11.93	246	0	0
1	23	129	74	122	73	125.5	73.5	168	66	70	23.38	69	144.66	95	78.04	44.61	0	61.39	337	1.12	0.64	5.33	4	0.6	177.3	2	27.59	5	2	33.72	0	3.74185	0.692889	2.27036	1.15391	87.772	4.33171	0	0	0	0	0	0	0	166	7.06	297	0	0
2	21	99	62	123	108	111	85	153	41	63	17.51	63	163.38	61	74.05	65.12	0	302.33	208	1.49	0.63	5.2	3	0.26	46.8	3	14.21	4.3	1	23.45	0	4.22607	3.4123	0.9776	1.68443	37.794	4.11024	0	1	0	0	0	0	0	139	6.52	209	0	0
2	38	121	66	113	60	117	63	158	59	80	23.63	70	144.94	52	81.44	50.21	0	42.12	278	1.14	0.63	5.72	4	0.24	0.5	1	10.02	5.1	2	24.18	0	3.74909	0.475395	2.23244	1.29876	86.306	4.52043	0	0	0	0	0	0	0	108	6.61	318	0	0
1	40	111	77	109	73	110	75	165	53	70	19.47	89	155.13	80	71.93	47.05	0	69.08	360	1.17	0.7	5.72	4	0.2	189	2	16.23	4.6	1	29.6	0	4.01267	0.779684	2.43828	1.21702	94.264	3.99256	0	0	0	0	0	0	0	162	8.2	250	0	0
2	28	127	71	128	73	127.5	72	161	46	62	17.75	68	155.06	58	78.53	54.05	0	53.98	306	1.1	0.61	2.15	1	0.21	9.8	1	15.19	10.9	4	22.5	0	4.01086	0.609255	2.33352	1.39809	90.214	4.3589	0	0	0	0	0	0	0	125	5.8	205	0	0
2	35	116	62	107	60	111.5	61	161	50	64	19.29	84	206.56	47	82.66	50.43	0	90.66	275	1.2	0.95	5.15	3	0.4	59.7	3	11.99	8.8	4	51.62	0	5.34299	1.02325	3.56953	1.30445	137.998	4.58814	0	0	0	0	0	0	0	155	9.02	189	0	0
2	63	155	99	144	95	149.5	97	166	48	67	17.42	80	224.73	64	87.66	56.29	0	378.84	267	1.35	0.9	4.75	3	0.41	80.2	3	27.16	5	2	44.85	0	5.81298	4.27585	2.3971	1.45603	92.672	4.86567	1	1	0	1	0	0	0	161	5.34	224	0	0
1	38	120	67	114	66	117	66.5	180	88	95	27.16	75	192.14	83	83.21	31.6	0	239.99	424	0.99	0.88	3.63	2	0.32	241.3	3	21.99	4.8	2	53.67	0	4.96999	2.70869	2.91107	0.817382	112.542	4.61867	0	1	0	0	0	0	0	175	5.47	196	0	0
2	39	114	69	112	68	113	68.5	153	45	72	19.22	69	172.32	53	80.02	64.4	0	43.32	194	1.39	0.7	2.72	1	0.14	14.2	2	16.45	5.5	3	28.08	0	4.45732	0.488939	2.56741	1.6658	99.256	4.44161	0	0	0	0	0	0	0	129	8.16	231	0	0
1	19	133	68	118	68	125.5	68	168	57	70	20.2	51	129.41	66	84.39	36.05	0	316.31	206	0.95	0.6	5.76	4	0.22	38.8	1	17.64	4.6	1	25.85	0	3.34739	3.57009	0.778531	0.932488	30.098	4.68417	0	1	0	0	0	0	0	175	7.37	239	0	0
1	18	123	64	116	65	119.5	64.5	173	60	66	20.05	78	125.67	53	75.16	69.3	0	30.08	370	1.21	0.5	4.46	3	0.15	82.7	1	17.5	5.7	3	16.97	0	3.25065	0.339503	1.30248	1.79255	50.354	4.17185	0	0	0	0	0	0	0	182	6.78	197	0	0
1	27	155	84	153	81	154	82.5	166	94.5	110	34.29	80	183.41	72	111.65	42.76	0	269.63	521	1.13	0.76	0.9	1	0.42	414	4	18.88	5.1	2	49.87	0	4.74418	3.04323	2.24325	1.10605	86.724	6.19727	0	1	0	1	0	0	0	181	7.75	162	0	0
1	29	100	70	102	65	101	67.5	182	74	81	22.34	86	162.48	82	75.51	38.62	0	65.28	344	1.01	0.82	2.09	1	0.54	247.2	3	15.91	6.5	4	41.97	0	4.20279	0.736795	2.86611	0.998965	110.804	4.19127	0	1	0	0	0	0	0	163	6.79	244	0	0
1	40	147	96	133	95	140	95.5	176	84	93	27.12	97	242.19	75	65.3	78.91	0	167.18	673	1.85	0.96	0.19	1	0.29	507.4	4	27.79	13.5	4	56.8	1	6.26461	1.88691	3.35861	2.04113	129.844	3.62456	0	1	0	1	0	0	0	120	5.6	231	1	0
1	58	124	75	126	77	125	76	160	64.5	87	25.2	88	147.36	72	84.36	28.5	0	131.42	330	0.88	0.75	14.53	4	0.51	112.3	1	19.91	8.3	4	37.67	0	3.81169	1.4833	2.39462	0.737196	92.576	4.6825	0	1	0	0	0	0	0	159	5.93	278	0	0
1	70	127	85	134	85	130.5	85	167	64	85	22.95	76	201.98	87	82.1	47.85	0	66.48	345	1.2	0.87	0.36	1	0.25	140	2	21.06	5.4	3	45.13	0	5.22452	0.750339	3.64289	1.23771	140.834	4.55706	0	0	0	0	0	0	0	186	7.17	240	0	0
1	28	119	72	110	66	114.5	69	177	58	68	18.51	84	221.6	61	90.92	61.61	0	83.99	346	1.53	0.96	0.54	1	0.28	335.6	4	15.09	5.6	3	59.01	1	5.73202	0.947968	3.70388	1.59364	143.192	5.04663	0	0	0	0	0	0	0	180	6.69	254	0	0
2	28	110	70	100	60	105	65	166	51	65	18.51	60	153.03	60	85.83	44.33	47.5	100.72	207	1.27	0.64	2.07	1	0.37	15.7	2	13.7	6.1	3	25.59	0	3.95835	1.13679	2.29064	1.14666	88.556	4.7641	0	0	0	0	0	0	0	143	5.96	256	0	0
2	32	100	80	90	70	95	75	156	43	69	17.67	60	148.87	64	82.88	55.23	33.1	49.68	252	1.25	0.59	4.89	3	0.36	37.9	2	14.49	4.9	2	16.6	0	3.85075	0.560722	2.16513	1.42861	83.704	4.60036	0	0	0	0	0	0	0	156	6.56	177	0	0
2	58	130	80	120	70	125	75	164	62	87	23.05	60	226.08	67	71.28	48.38	359.9	101.64	280	1.29	0.94	0.03	1	0.63	258.7	4	17.1	5.4	2	43.09	0	5.8479	1.14718	4.07067	1.25142	157.372	3.95648	0	0	0	0	0	0	0	157	7.14	292	0	0
1	69	170	120	160	110	165	115	174	59	75	19.49	79	146.65	79	92.77	48.25	13.9	70.24	280	1.14	0.63	3.09	2	0.45	163.6	2	23.41	7.5	4	21.74	0	3.79333	0.792777	2.18189	1.24806	84.352	5.14931	1	0	0	1	0	0	0	183	7.19	232	0	0
1	59	120	80	110	70	115	75	176	55	80	17.76	60	161	86	84.26	37.3	359.9	87.19	270	1.05	0.74	5.41	4	0.25	332.2	4	23.18	4.1	1	30.71	0	4.16451	0.984086	2.74863	0.964822	106.262	4.67695	0	1	0	0	0	1	0	167	6.57	232	0	0
2	56	180	110	160	105	170	107.5	152	53	80	22.94	55	158.5	63	91.77	80.38	59.1	33.1	361	1.62	0.53	2.18	1	0.38	244.9	4	14.35	5.9	3	18.55	0	4.09984	0.373589	1.84946	2.07915	71.5	5.09381	0	0	0	1	0	0	0	173	7.45	176	0	0
2	30	120	80	110	75	115	77.5	157	46	73	18.66	80	179.71	65	78.12	78.18	182.2	57.64	235	1.86	0.58	5.16	3	0.22	12.8	2	11.22	8.2	4	16.16	0	4.64847	0.650564	2.32804	2.02225	90.002	4.33615	0	0	0	0	0	0	0	144	5.19	288	0	0
2	57	130	90	120	80	125	85	155	51	83	21.23	61	191.84	51	94.65	32.34	146.4	151.57	304	0.99	0.97	0.05	1	2.4	324.3	4	18.74	7.2	4	59.53	1	4.96223	1.71072	3.34159	0.836524	129.186	5.25366	1	1	0	1	0	0	0	132	6.19	247	0	0
1	67	180	140	170	120	175	130	180	80	80	24.69	60	299.49	98	87.88	46.32	218.9	205.3	441	1.41	1.39	2.01	1	0.36	453.4	4	27.25	4.8	2	89.83	1	7.74677	2.31716	5.48655	1.19814	212.11	4.87789	1	1	0	1	0	1	0	148	8.18	270	1	1
1	37	100	70	90	60	95	65	168	49	67	17.36	64	121.28	60	85.72	26.45	300.7	90.8	333	0.8	0.64	1.92	1	0.62	106.6	1	16.27	8.6	4	27.08	0	3.13709	1.02483	1.98319	0.68417	76.67	4.75799	0	1	0	0	0	0	0	162	7.53	221	0	0
1	32	120	90	110	80	115	85	158	56	78	22.43	72	158.23	95	85.65	37.61	56.5	72.56	346	1.07	0.75	4.41	3	0.23	175.7	2	14.11	4.9	2	27.75	0	4.09286	0.818962	2.74465	0.97284	106.108	4.75411	0	1	0	0	0	0	0	159	7.66	254	0	0
1	39	110	70	100	60	105	65	167	69	82	24.74	60	180.55	100	95.2	34.58	64.5	187.51	397	1.14	0.85	5.79	4	0.26	597.1	4	24.29	8.4	4	56.01	1	4.6702	2.11637	2.80569	0.894465	108.468	5.28419	0	1	0	0	0	0	0	187	6.39	207	0	0
1	63	140	90	130	80	135	85	171	63	85	21.55	60	169.25	79	69.89	47.61	107.4	112.39	338	1.3	0.72	2.52	1	0.46	297.8	3	19.98	4.8	2	29.96	0	4.37791	1.26851	2.56498	1.23151	99.162	3.87933	1	0	0	1	0	1	1	183	6.68	202	0	0
1	49	120	80	110	70	115	75	174	65	85	21.47	60	178.19	79	91.94	64.14	54.3	102.2	403	1.72	0.68	3.92	2	0.33	534.7	4	18.39	4.7	1	31.45	0	4.60916	1.1535	2.42137	1.65908	93.61	5.10324	0	0	0	0	0	1	1	172	6.57	209	0	0
1	28	100	70	90	60	95	65	177	56	72	17.87	46	147.14	78	82.18	40.3	36	125.63	397	1.06	0.62	5	3	0.22	215.6	3	19.05	5.2	2	30.24	0	3.806	1.41795	2.11366	1.04242	81.714	4.5615	0	0	0	0	0	1	0	179	9.5	203	0	0
1	40	140	90	130	80	135	85	173	53	81	17.71	66	188.59	71	103.92	55.64	17.4	71.26	340	1.39	0.77	5.66	4	0.16	204.1	3	20.42	5.1	2	31.23	0	4.87817	0.804289	3.07031	1.43921	118.698	5.76821	0	0	0	0	0	1	0	177	6.38	177	0	0
2	36	110	80	100	60	105	70	165	50	68	18.37	86	138.96	67	90.65	64.7	141.1	46.9	275	1.37	0.48	6.01	4	0.33	9.8	1	15.02	6.2	3	13.39	0	3.59441	0.529345	1.67822	1.67356	64.88	5.03164	0	0	0	0	0	0	0	174	6.62	285	0	0
1	56	120	80	110	70	115	75	165	49	74	18	60	197.46	69	68.71	56.64	75.7	77.74	323	1.35	0.79	3.97	2	0.21	297.2	3	17.35	5	2	34	0	5.1076	0.877427	3.24035	1.46508	125.272	3.81383	0	0	0	0	0	1	0	133	5.66	293	0	0
2	49	150	105	145	95	147.5	100	161	75	86	28.93	60	236.69	66	92.81	46.68	12.6	261.62	345	1.26	0.91	2.9	2	0.35	219.6	4	17.07	6	3	62.27	1	6.12235	2.95282	3.56146	1.20745	137.686	5.15153	1	1	0	1	0	0	0	163	4.97	194	0	0
2	67	140	98	130	80	135	89	153	56	75	23.92	0	246.53	61	98.88	36.61	557.9	131.38	403	1.18	1.23	4.13	2	0.91	456.5	4	19.54	10.7	4	89.06	1	6.37688	1.48284	4.75023	0.946974	183.644	5.48845	0	1	0	0	0	0	0	172	8.61	250	1	1
1	26	120	80	110	70	115	75	173	59	77	19.71	59	165.85	71	82.32	44.32	160.5	109.98	298	1.18	0.73	3.89	2	0.31	249	3	15.34	6.8	4	37.35	0	4.28996	1.24131	2.5746	1.1464	99.534	4.56927	0	0	0	0	0	1	0	178	7.76	256	0	0
1	55	120	90	110	80	115	85	162	54	77	20.58	60	228.93	76	86.25	50.51	1157.3	103.22	329	1.52	1.04	4.64	3	0.36	349.7	4	18.98	8.3	4	54.66	1	5.92162	1.16501	4.08112	1.30652	157.776	4.78741	0	0	0	0	0	1	0	164	7.31	231	0	0
2	53	130	80	120	70	125	75	159	56	95	22.15	60	143.53	45	80.41	33.28	75.4	91.36	271	1	0.67	20.96	4	0.87	797.7	4	18.46	16.3	4	26.89	0	3.71262	1.03115	2.37915	0.860838	91.978	4.46325	0	1	0	0	0	0	0	162	6.7	223	0	0
2	25	120	80	110	65	115	72.5	160	45	71	17.58	60	144.64	67	82.04	49.25	18.7	60.14	281	1.23	0.6	5.45	4	0.13	68.6	3	14.7	4.4	1	19.74	0	3.74133	0.678781	2.15629	1.27393	83.362	4.55373	0	0	0	0	0	0	0	147	7.8	256	0	0
1	31	100	70	90	60	95	65	164	52	70	19.33	60	159.96	82	97.81	43.94	51.7	77.83	359	1.09	0.7	4.09	2	0.15	272.7	3	17.03	4.8	2	28.12	0	4.13761	0.878442	2.5984	1.13658	100.454	5.42906	0	0	0	0	0	0	0	171	9.11	292	0	0
2	35	120	70	110	65	115	67.5	154	44	69	18.55	60	122.81	62	93.61	48.42	231.8	63.39	265	1.17	0.51	4.88	3	0.33	14.7	2	17.57	4.6	1	15.19	0	3.17667	0.715463	1.59628	1.25246	61.712	5.19594	0	0	0	0	0	0	0	155	10.07	220	0	0
2	46	130	90	120	80	125	85	154	52	75	21.93	60	171.67	58	78.26	69.38	21.9	62.09	203	1.48	0.63	5.5	4	0.3	47.7	3	17.43	5.6	3	18.41	0	4.44051	0.70079	2.32468	1.79462	89.872	4.34392	0	0	0	0	0	0	0	149	7.46	277	0	0
1	20	120	80	110	70	115	75	170	60	76	20.76	60	120.94	88	83.19	46.63	28.9	57.18	360	1.13	0.47	5.5	4	0.07	203	3	18.25	4.8	2	13.53	0	3.1283	0.645372	1.62633	1.20616	62.874	4.61756	0	0	0	0	0	0	0	123	6.38	306	0	0
2	19	110	80	100	70	105	75	164	53	73	19.71	60	136.32	58	69.68	43.96	50.4	76.45	314	1.03	0.56	2.67	1	0.22	107.2	3	17.17	6	3	18.62	0	3.52613	0.862867	1.99353	1.13709	77.07	3.86767	0	0	0	0	0	0	0	139	5.75	227	0	0
2	30	110	80	100	70	105	75	157	50	69	20.28	71	168	57	83.05	54.18	308.4	58.38	317	1.22	0.73	3.43	2	0.06	5.4	1	11.51	6.7	3	28.35	0	4.34558	0.658916	2.64211	1.40145	102.144	4.60979	0	0	0	0	0	0	0	122	5.68	299	0	0
2	27	110	80	100	70	105	75	150	55	87	24.44	55	171.81	72	60.13	49.16	138.5	70.05	298	1.15	0.71	5.28	3	0.22	1.5	1	14.14	4.8	1	27.22	0	4.44413	0.790632	2.81014	1.2716	108.64	3.33759	0	0	0	0	0	0	0	119	5.88	289	0	0
1	33	130	90	120	80	125	85	172	60	69	20.28	69	162.94	61	82.11	35.73	42.1	98.96	231	1.07	0.81	14.45	4	0.49	67.1	1	22.75	12.5	4	39.86	0	4.21469	1.11693	2.77853	0.924211	107.418	4.55762	0	1	0	0	0	1	0	185	9.75	269	0	0
2	38	140	90	130	80	135	85	165	71	96	26.08	85	179.65	65	93.02	36.39	313.4	150.09	269	1.13	0.76	0.26	1	0.62	1	1	17.82	4.8	1	39.12	0	4.64692	1.69402	2.92918	0.941283	113.242	5.16319	0	1	0	0	0	0	0	123	8.29	428	0	0
1	24	117	78	107	66	112	72	178	56	65	17.67	71	148.45	85	82.08	40.32	293.5	80.34	346	1.16	0.67	4.97	3	0.34	151.8	2	44.91	5.1	2	25.35	0	3.83989	0.906772	2.38132	1.04294	92.062	4.55595	0	0	0	0	0	1	0	184	8.33	295	0	0
1	33	120	80	110	70	115	75	172	54	70	18.25	62	203.9	84	92.63	49.38	115.7	136.94	303	1.24	0.83	2.04	1	0.33	207.6	3	18.35	5.8	3	39.11	0	5.27419	1.5456	3.28846	1.27729	127.132	5.14154	0	0	0	0	0	1	0	176	7.99	171	0	0
2	33	100	70	90	60	95	65	160	50	76	19.53	66	157.81	65	95.06	52.56	219.4	70.42	293	1.2	0.63	4.62	3	0.38	2.9	1	14.73	6.4	3	23.29	0	4.082	0.794808	2.35815	1.35954	91.166	5.27642	0	0	0	0	0	0	0	136	8.45	372	0	0
2	63	125	85	115	75	120	80	157	51	84	20.69	81	192.19	51	87.98	54.21	336	101.83	273	1.39	0.8	0.9	1	0.49	136.9	4	14.18	5.8	3	36.03	0	4.97129	1.14932	3.04227	1.40222	117.614	4.88344	0	0	0	0	0	0	0	163	4.39	256	0	0
2	27	105	75	90	65	97.5	70	160	54	70	21.09	76	194.06	62	81.66	59.91	377.4	65.33	313	1.34	0.79	3.11	2	0.25	74.2	3	16.27	5.2	2	34.2	0	5.01966	0.737359	3.13202	1.54966	121.084	4.53264	0	0	0	0	0	0	0	150	4.51	277	0	0
2	25	100	70	90	60	95	65	170	44	64	15.22	67	148.52	62	66.04	64.69	18.1	41.25	269	1.28	0.55	5.32	3	0.13	33.9	2	14.11	5.9	3	16.97	0	3.8417	0.465576	1.95499	1.67331	75.58	3.66563	0	0	0	0	0	0	0	149	5.42	219	0	0
2	76	150	110	140	100	145	105	144	51	81	24.59	64	186.51	62	104.09	44.28	742	115.82	210	1.25	0.84	3.3	2	0.36	224.3	4	13.4	5.1	2	35.89	0	4.82437	1.30722	3.07982	1.14537	119.066	5.77764	1	0	0	1	0	0	0	148	7.37	254	0	0
2	51	120	75	105	65	112.5	70	169	69	82	24.16	58	161.14	73	93.22	52.09	46.9	102.66	224	1.26	0.65	3.94	2	0.14	92.8	3	13.97	4.8	1	25.08	0	4.16813	1.15869	2.28965	1.34739	88.518	5.17429	0	0	0	0	0	0	0	173	5.4	242	0	0
1	51	120	80	110	70	115	75	173	56	73	18.71	45	156.01	64	102.22	29.66	1037.7	157.04	260	0.96	0.78	1	1	0.38	156.6	2	10.73	6.4	4	40.26	0	4.03544	1.77246	2.45582	0.767201	94.942	5.67385	0	1	0	0	0	1	0	156	8.47	247	0	0
1	42	123	83	115	78	119	80.5	167	56	77	20.08	59	159.82	83	103.78	34.65	741.4	187.88	492	1.1	0.74	7.99	4	0.42	277.1	3	24	5.9	3	35.62	0	4.13399	2.12054	2.26575	0.896275	87.594	5.76044	0	1	0	0	0	1	0	171	7.35	210	0	0
1	50	165	95	155	85	160	90	167	60	90	21.51	76	177.43	71	113.12	39.19	29.3	288.76	591	1.78	0.79	7.82	4	0.38	720.8	4	24.29	5.1	2	48.36	0	4.5895	3.25914	2.08195	1.01371	80.488	6.27886	0	1	0	1	0	1	1	183	7.39	178	0	0
2	73	135	84	125	76	130	80	148	40	75	18.26	71	227.47	60	85.14	53.7	147.4	77.84	267	1.3	0.99	4.77	3	0.38	62.2	3	17.43	5.2	2	44.78	0	5.88386	0.878555	4.09214	1.38903	158.202	4.7258	0	0	0	0	0	0	0	153	5.7	233	0	0
2	48	118	78	107	63	112.5	70.5	161	51	70	19.68	63	171.74	76	93.19	68.4	60.7	40.32	199	1.44	0.66	1.72	1	0.16	62.7	3	14.01	5.7	3	19.83	0	4.44232	0.455079	2.46446	1.76927	95.276	5.17262	0	0	0	0	0	0	0	153	6.16	169	0	0
1	24	108	78	98	68	103	73	177	68	75	21.71	67	192.54	76	103.85	41.46	38.2	157.32	299	1.17	0.84	1.25	1	0.3	259.9	3	21.83	9.8	4	43	0	4.98034	1.77562	3.09405	1.07243	119.616	5.76432	0	0	0	0	0	0	0	179	6.78	181	0	0
1	22	120	78	108	63	114	70.5	176	61	77	19.69	46	140.97	81	83.43	39.59	66.1	109.24	338	1.14	0.67	10.52	4	0.34	183.4	2	14.95	7.2	4	33.03	0	3.6464	1.23296	2.05722	1.02406	79.532	4.63088	0	1	0	0	0	0	0	167	5.97	180	0	0
1	45	105	75	95	66	100	70.5	172	61	80	20.62	62	166.75	91	92.77	53.37	109.6	75.71	325	1.43	0.68	2.84	2	0.23	212.7	3	21.09	6.1	3	26	0	4.31324	0.854515	2.54108	1.3805	98.238	5.14931	0	0	0	0	0	1	1	185	6.45	155	0	0
2	81	160	95	155	85	157.5	90	138	39	75	20.48	60	126.69	52	85.31	59.43	160.2	67.56	250	1.3	0.51	4.29	2	0.4	180.1	4	21.26	5.6	3	13.93	0	3.27703	0.762528	1.39027	1.53725	53.748	4.73524	0	0	0	1	0	0	0	154	6.95	187	0	0
1	52	135	95	125	88	130	91.5	162	66	86	25.15	60	178.12	86	86.32	38.28	185	123.41	289	1.04	0.84	0.4	1	0.37	250.8	3	20.76	4.8	2	40.43	0	4.60735	1.39289	2.97874	0.990171	115.158	4.7913	0	1	0	1	0	1	0	169	8.59	194	0	0
2	80	140	88	130	76	135	82	147	40	84	18.51	60	183.53	61	102.7	42.15	23.2	124.62	339	1.11	0.8	4.61	3	0.49	195.1	4	16.7	5.2	2	36.53	0	4.74728	1.40655	3.01231	1.09027	116.456	5.70049	0	0	0	0	0	0	0	147	3.55	186	0	0
1	83	140	80	130	70	135	75	160	58	89	22.66	60	131.33	77	88.5	34.16	43.7	72.74	251	0.95	0.63	5.28	3	0.29	13.7	1	18.6	4.7	1	24.01	0	3.39705	0.820993	2.13714	0.883601	82.622	4.9123	1	1	0	1	0	1	0	109	7.6	251	0	0
1	41	135	85	125	76	130	80.5	169	72	95	25.21	87	223.45	74	97.5	59.32	12	335.08	440	1.52	0.78	3.37	2	0.31	441.1	4	25.9	6	3	57.66	1	5.77988	3.78194	2.512	1.5344	97.114	5.41186	0	1	0	0	0	0	1	162	5.66	224	0	0
2	32	105	75	95	65	100	70	163	43	61	16.18	60	154	65	84.89	64.34	190.5	61.72	284	1.38	0.58	5.32	3	0.36	8.8	1	18.77	4.8	1	21.18	0	3.98345	0.696614	1.9999	1.66425	77.316	4.71192	0	0	0	0	0	0	0	126	4.45	213	0	0
1	37	110	80	100	70	105	75	173	65	84	21.72	60	184.98	93	88.43	80.83	13.6	81.64	476	1.75	0.66	0.05	1	0.39	141.6	2	26.96	5.7	3	23.62	0	4.78479	0.921445	2.27165	2.09079	87.822	4.90841	0	0	0	0	0	1	1	156	6.19	182	0	0
2	18	112	82	102	74	107	78	152	39	60	16.88	56	136.19	72	75.03	54.27	101.6	66.91	276	1.24	0.54	5.82	4	0.36	19.1	2	21.26	4.6	1	18.3	0	3.52276	0.755192	1.77284	1.40378	68.538	4.16463	0	0	0	0	0	0	0	151	5.11	177	0	0
1	36	110	80	100	70	105	75	165	58	82	21.3	60	176.32	76	90.17	36.12	816.8	67.46	399	0.97	0.86	1.06	1	0.19	96.4	1	15.55	5.3	3	44.13	0	4.56079	0.7614	3.2775	0.934299	126.708	5.005	0	1	0	0	0	1	0	168	5.5	191	0	0
1	34	120	80	110	60	115	70	175	58	75	18.94	60	163.7	74	94.48	49.5	143.6	83.68	506	1.37	0.75	3.34	2	0.16	609.5	4	35.07	7.1	4	42.02	0	4.23435	0.94447	2.52106	1.28039	97.464	5.24423	0	0	0	0	0	1	1	162	4	316	0	0
2	58	167	108	156	96	161.5	102	157	63	88	25.56	63	209.52	55	125.86	41.83	43	216.51	289	1.25	0.88	1.64	1	0.65	199.6	4	21.29	7.3	4	61.06	1	5.41956	2.44368	3.21749	1.082	124.388	6.98601	1	1	0	1	0	0	0	146	6.1	321	0	0
2	35	115	76	95	65	105	70.5	164	63	76	23.42	60	134.45	63	92.46	51.27	28.9	65.8	280	1.18	0.55	5.15	3	0.19	0	1	16.78	5.5	3	19.62	0	3.47775	0.742664	1.81117	1.32618	70.02	5.1321	0	0	0	0	0	0	0	128	4.35	206	0	0
1	35	130	80	120	70	125	75	168	56	87	19.84	0	217.21	81	96.35	40.02	46.6	130.08	343	1.08	0.97	4.13	2	0.26	180.6	2	20.15	4.6	1	52.92	0	5.61847	1.46817	3.91035	1.03518	151.174	5.34802	0	0	0	0	0	0	0	163	7.9	333	0	0
1	32	118	78	108	67	113	72.5	171	66	83	22.57	57	146.79	78	95.9	42.89	44	82.84	311	1.07	0.63	5.41	4	0.26	184.5	2	15.59	5.1	2	24.36	0	3.79695	0.934989	2.25898	1.10942	87.332	5.32305	0	0	0	0	0	1	0	174	7	240	0	0
2	27	102	72	92	66	97	69	161	45	70	17.36	65	123.64	55	83.99	76.55	68.4	35.6	140	1.48	0.39	5.56	4	0.22	7.4	1	16.16	4.4	1	10.07	0	3.19814	0.401806	1.03389	1.98008	39.97	4.66197	0	0	0	0	0	0	0	94	5.11	386	0	0
2	25	106	78	96	64	101	71	156	49	73	20.13	59	200.58	82	80.38	45.92	490	61.35	320	1.18	0.92	0.37	1	0.63	72.2	3	19.4	5.2	2	42.91	0	5.18831	0.692438	3.68314	1.18779	142.39	4.46159	0	0	0	0	0	0	0	146	5.3	232	0	0
2	24	108	78	98	63	103	70.5	163	44	65	16.56	58	144.09	67	86.63	43.42	37.9	94.24	269	1.09	0.65	5.55	4	0.48	21.1	2	12.81	4.8	1	29.84	0	3.72711	1.06366	2.11645	1.12312	81.822	4.8085	0	0	0	0	0	0	0	158	6.34	254	0	0
2	43	128	78	116	68	122	73	156	47	70	19.31	60	228.03	69	85.31	53.76	175.4	63.2	302	1.34	0.99	3.34	2	0.4	139	4	16.16	6.4	3	46.37	0	5.89834	0.713318	4.18081	1.39058	161.63	4.73524	0	1	0	0	0	0	0	161	7.61	294	0	1
1	41	102	83	96	73	99	78	171	54	76	18.47	58	192.88	73	97.64	35.24	526.4	74.88	449	1.04	0.97	22.81	4	0.4	390.8	4	25.37	7.1	4	49.04	0	4.98914	0.845147	3.69022	0.911536	142.664	5.41963	0	1	0	0	0	1	0	198	7.26	193	0	0
2	29	138	98	128	88	133	93	157	49	71	19.88	60	131.75	71	93.4	57.79	81.2	58.29	286	1.18	0.53	5.66	4	0.38	26.5	2	21.53	4.9	2	13.92	0	3.40792	0.657901	1.61154	1.49483	62.302	5.18428	0	0	0	1	0	0	0	144	4.83	242	0	0
2	32	118	78	108	66	113	72	156	41	70	16.85	80	181.1	79	96.56	54.31	758.1	77.1	339	1.18	0.8	5.75	4	0.28	40.3	2	16.34	4.5	1	33.2	0	4.68443	0.870203	2.88076	1.40481	111.37	5.35968	0	0	0	0	0	0	0	140	4.93	302	0	0
1	27	108	79	98	68	103	73.5	165	52	74	19.1	60	159.54	92	91.18	29.31	430.3	212.8	375	0.95	0.68	5.35	4	0.35	75.7	1	24.26	4.4	1	43.46	0	4.12675	2.40181	2.26772	0.758148	87.67	5.06106	0	1	0	0	0	0	0	155	5.6	336	0	0
2	71	102	83	92	73	97	78	158	47	72	18.83	60	147.76	73	101.42	51.74	21.3	81.36	307	1.37	0.66	2.19	1	0.76	86.8	3	19.84	5.2	2	25.72	0	3.82204	0.918284	2.0628	1.33833	79.748	5.62944	0	0	0	0	0	0	0	168	7.96	219	0	0
1	29	110	70	100	60	105	65	176	55	80	17.76	60	147.97	94	88.75	41.86	373.3	70.15	334	1.08	0.69	5.5	4	0.22	205.3	3	21.79	4.6	1	28.15	0	3.82747	0.791761	2.38179	1.08277	92.08	4.92618	0	0	0	0	0	0	0	167	5.63	294	0	0
1	35	118	78	97	67	107.5	72.5	181	79	85	24.11	60	173.41	80	107.57	24.47	75.4	274.04	411	0.88	0.83	1.87	1	0.2	311.9	4	23.18	4.9	2	60.91	1	4.48551	3.093	2.43487	0.632954	94.132	5.9708	0	1	0	0	0	0	0	184	9.04	220	0	0
1	24	122	82	112	76	117	79	176	68	68	21.95	68	178.4	71	99.37	48.6	58.7	139.25	287	1.3	0.77	5.08	3	0.16	159.3	2	37.26	5.5	3	45.96	0	4.61459	1.57167	2.63709	1.25711	101.95	5.51565	0	0	0	0	0	1	1	182	4.85	254	0	0
1	32	118	77	107	69	112.5	73	165	61	83	22.41	49	145.41	72	97.32	37.62	160.8	124.34	269	1	0.68	1.6	1	0.23	54.7	1	18.91	7.1	4	39.21	0	3.76125	1.40339	2.1449	0.973099	82.922	5.40187	0	1	0	0	0	0	0	170	5.39	224	0	0
2	33	111	77	101	63	106	70	150	73	87	32.44	62	144.37	58	91.49	83.24	46.6	37.54	272	1.67	0.44	4.45	2	0.15	4.4	1	15.27	12	4	11.99	0	3.73435	0.423702	1.38702	2.15313	53.622	5.07826	0	0	0	0	0	0	0	136	8.85	271	0	0
1	35	118	78	108	67	113	72.5	167	63	68	22.59	51	184.08	76	103.92	39.02	86.3	128.32	337	1.15	0.84	1.69	1	0.4	400.9	4	19.95	6.1	3	37.04	0	4.76151	1.44831	3.08836	1.00931	119.396	5.76821	0	1	0	0	0	1	0	176	8.01	190	0	0
1	59	141	101	131	97	136	99	172	68	73	22.99	63	136.67	75	84.3	38.15	558.8	50.23	323	0.92	0.68	5	3	0.22	255.7	3	20.76	4.7	1	26.45	0	3.53518	0.56693	2.28852	0.986808	88.474	4.67917	0	1	0	1	0	0	0	173	5.04	296	0	0
1	18	119	81	109	73	114	77	176	67.5	74	21.79	65	109.99	75	87.29	28.81	13.9	199.28	283	0.96	0.49	5.11	3	0.28	60.7	1	18.35	4.5	1	26.07	0	2.84506	2.24921	1.06891	0.745215	41.324	4.84514	0	1	0	0	0	0	0	181	9.13	278	0	0
1	22	102	73	92	65	97	69	162	48.5	65	18.48	56	148.32	82	95.59	43.78	143.9	43.84	303	1.06	0.72	5.09	3	0.11	164.2	2	13.63	4.6	1	27.95	0	3.83652	0.494808	2.47729	1.13244	95.772	5.30584	0	0	0	0	0	1	0	182	7.05	241	0	0
1	35	115	76	105	67	110	71.5	170	63.5	82	21.97	79	267.68	76	76.7	50.46	47.9	567.68	471	1.66	0.89	2.9	2	0.36	230.1	3	58.13	5.1	2	62.87	1	6.92395	6.40722	2.68195	1.30523	103.684	4.25733	0	1	0	0	0	1	0	183	7.6	273	1	0
2	66	117	80	107	75	112	77.5	143	40	81	19.56	58	188.52	62	93.3	41.52	148.9	139.53	270	1.19	0.85	1.34	1	0.41	226.6	4	14.04	5	2	45.45	0	4.87636	1.57483	3.08055	1.07398	119.094	5.17873	0	0	0	0	0	0	0	157	5.87	284	0	0
1	64	111	78	101	68	106	73	170	65.5	87	22.66	54	201.27	66	90.48	55.44	241.1	78.3	199	1.34	0.9	2.26	1	0.38	263.5	3	18.77	6.9	4	37.16	0	5.20616	0.883747	3.36705	1.43404	130.17	5.0222	0	0	0	0	0	1	0	155	5.84	217	0	0
1	70	133	81	123	75	128	78	171	59.5	84	20.35	0	159.2	60	83.19	51.89	55.2	94.6	326	1.26	0.72	22.24	4	1.94	234.2	3	21.49	14.6	4	29.32	0	4.11795	1.06772	2.28634	1.34221	88.39	4.61756	0	0	0	0	0	1	1	167	5.73	298	0	0
1	46	91	73	88	68	89.5	70.5	167	59.5	84	21.33	55	147.76	70	89.58	48.46	40.5	105.44	417	1.29	0.67	3.98	2	0.22	218.5	3	13.8	4.6	1	32.78	0	3.82204	1.19007	2.02307	1.25349	78.212	4.97225	0	0	0	0	0	1	1	191	7.08	180	0	0
2	29	101	71	91	62	96	66.5	154	48	65	20.24	70	167.65	67	82.43	41.89	411.4	78.3	267	1.08	0.75	5.37	3	0.31	8.3	1	18.95	4.9	2	32.71	0	4.33652	0.883747	2.8479	1.08355	110.1	4.57538	0	0	0	0	0	0	0	136	6.19	256	0	0
1	35	116	76	106	68	111	72	172	64	70	21.63	65	150.19	63	65.07	61.54	36	88.12	366	1.46	0.58	5.6	4	0.22	160.4	2	18.63	4.6	1	22.26	0	3.88489	0.994582	1.8372	1.59183	71.026	3.61179	0	0	0	0	0	1	0	167	7.43	238	0	0
1	29	120	90	110	80	115	85	175	63	76	20.57	60	182.07	99	85.86	59.92	36.3	109.69	350	1.42	0.69	2.74	2	0.18	334.2	4	23.05	5.7	3	27.11	0	4.70952	1.23804	2.59214	1.54992	100.212	4.76576	0	0	0	0	0	1	1	160	6.27	228	0	0
1	74	160	110	150	100	155	105	163	62	85	23.34	60	190.87	97	94.48	35.58	115.7	115.72	301	1.1	0.92	4.71	3	0.52	107.2	1	24.49	4.5	1	49.22	0	4.93714	1.30609	3.41816	0.920331	132.146	5.24423	1	1	0	1	0	0	0	149	4.5	219	0	0
1	43	110	80	100	70	105	75	149	42	75	18.92	60	147.83	92	88.78	55.02	43	68.29	321	1.29	0.58	5.51	4	0.31	119.1	1	27.49	5.2	2	18.56	0	3.82385	0.770767	2.04739	1.42318	79.152	4.92784	0	0	0	0	0	0	0	166	7.29	247	0	0
2	40	90	60	80	50	85	55	153	43	66	18.37	60	213.47	56	97.46	59.21	46.2	140.82	238	1.53	0.84	5.36	3	0.07	85.7	3	25.31	6	3	39.32	0	5.52173	1.58939	3.26167	1.53156	126.096	5.40964	0	0	0	0	0	0	0	160	5.64	296	0	0
1	35	125	80	120	80	122.5	80	170	60	85	20.76	60	183.87	88	89.37	42.45	67.7	128.59	339	1.2	0.83	2.6	2	0.28	180.1	2	16.85	7.3	4	36.57	0	4.75608	1.45135	2.99281	1.09803	115.702	4.96059	0	0	0	0	0	0	0	167	6.68	231	0	0
2	68	140	90	130	80	135	85	149	39	68	17.57	81	108.8	54	91.49	42.67	36	41.61	313	1.1	0.5	4.28	2	0.31	78.2	3	14.95	4.7	1	10.28	0	2.81428	0.469639	1.49529	1.10372	57.808	5.07826	0	0	0	0	0	0	0	194	9.03	193	0	0
2	76	210	160	200	150	205	155	158	52	83	20.83	89	175.7	62	107.5	41.89	79.2	76.35	319	1.23	0.74	1.67	1	1.11	193.4	4	22.22	7.1	4	29.63	0	4.54475	0.861738	3.06622	1.08355	118.54	5.96692	1	0	0	1	0	0	0	169	6.72	295	0	0
2	35	110	80	100	70	105	75	158	53	84	21.23	63	151.37	51	88.5	42.9	15.5	99.32	235	1.09	0.6	1.09	1	0.39	20.6	2	9.51	5.5	3	23.93	0	3.91542	1.12099	2.29193	1.10967	88.606	4.9123	0	0	0	0	0	0	0	180	4.59	159	0	0
2	59	150	100	140	95	145	97.5	151	51	80	22.37	56	165.64	69	87.6	46.31	508.3	46.71	189	1.17	0.72	0.98	1	0.03	42.8	3	19.84	5.7	3	25.47	0	4.28453	0.527201	2.84501	1.19788	109.988	4.86234	1	0	0	1	0	0	0	148	7.43	261	0	0
2	24	130	90	120	70	125	80	167	50	68	17.93	67	111.02	78	88.61	36.08	21.9	43.74	287	0.94	0.52	5.54	4	0.29	50.7	3	16.38	5	2	15.98	0	2.8717	0.493679	1.71216	0.933264	66.192	4.91841	0	1	0	0	0	0	0	149	6.26	180	0	0
1	42	100	70	90	60	95	65	171	60	85	20.52	60	196.35	74	101.98	51.66	20.9	158.24	285	1.26	0.8	2.32	1	0.3	189.5	2	17.68	12.6	4	43.64	0	5.07889	1.786	2.924	1.33626	113.042	5.66052	0	0	0	0	0	1	1	172	9.16	284	0	0
1	74	155	110	145	100	150	105	164	59	68	21.94	60	148.11	120	104.61	47.57	149.6	93.49	395	1.25	0.59	4.83	3	0.49	326.3	4	52.82	5.3	3	22.53	0	3.83109	1.05519	2.11697	1.23047	81.842	5.80651	0	0	0	1	0	0	0	165	7.54	136	0	0
2	28	100	70	90	60	95	65	169	54	87	18.91	60	138.27	58	87.29	39.04	95.6	70.79	241	1.03	0.62	4.79	3	0.11	27.5	2	12.81	5.3	2	22.72	0	3.57656	0.798984	2.20052	1.00983	85.072	4.84514	0	1	0	0	0	0	0	192	6.47	182	0	0
2	23	120	70	100	60	110	65	164	44	68	16.36	60	148.73	59	80.41	56.51	56.2	73.85	274	1.24	0.57	5.63	4	0.22	31.9	2	14.14	4.4	1	16.97	0	3.84713	0.833521	2.00336	1.46172	77.45	4.46325	0	0	0	0	0	0	0	157	6.41	263	0	0
2	49	130	80	120	70	125	75	163	57	87	21.45	63	156.63	50	94.41	53.82	211.2	74.59	256	1.37	0.64	1.15	1	0.47	100.5	3	15.98	6	3	21.01	0	4.05147	0.841874	2.27346	1.39214	87.892	5.24034	0	0	0	0	0	0	0	150	4.32	295	0	0
1	50	130	90	120	80	125	85	165	56	87	20.57	58	219.29	70	90.52	51.5	83.1	75.88	352	1.46	0.92	4.91	3	0.29	380.1	4	23.77	6.7	4	53.42	0	5.67227	0.856433	3.94759	1.33213	152.614	5.02442	0	0	0	0	0	0	0	135	6.12	180	0	0
1	27	100	70	90	60	95	65	167	51	68	18.29	67	116.22	70	87.5	45.78	26.4	50.41	318	0.99	0.49	57.76	4	0.22	118	1	20.76	373.1	4	11.94	0	3.00621	0.568962	1.56125	1.18417	60.358	4.85679	0	0	0	0	0	0	0	164	6.83	279	0	0
1	69	140	80	130	70	135	75	154	43	83	18.13	72	165.09	80	98.05	52.45	278.5	86.07	322	1.29	0.72	1.77	1	0.6	108.7	1	30.08	5.4	3	21.28	0	4.27031	0.971445	2.46834	1.3567	95.426	5.44238	0	0	0	0	0	1	0	172	6.4	234	0	0
1	31	120	70	110	65	115	67.5	172	73	85	24.68	80	130.02	83	94.93	37.14	459.8	90.89	342	1.06	0.6	0.93	1	0.38	325.6	4	14.39	5.7	3	24.92	0	3.36317	1.02585	1.93228	0.960683	74.702	5.26921	0	1	0	0	0	0	0	179	7.69	301	0	0
2	59	120	90	110	80	115	85	153	66	85	28.19	80	186.58	78	97.39	46.6	265.9	101.73	317	1.35	0.79	3.17	2	0.2	255.7	4	20.93	8.7	4	34.67	0	4.82618	1.14819	3.09452	1.20538	119.634	5.40575	0	0	0	0	0	0	0	151	5.08	264	0	0
1	21	120	80	110	70	115	75	168	49	70	17.36	83	123.57	82	95.41	37.41	32.2	103.3	489	1.06	0.53	2.94	2	0.25	135.8	2	20.59	5.5	3	22.8	0	3.19633	1.16591	1.69426	0.967667	65.5	5.29585	0	1	0	0	0	1	0	166	8.33	320	0	0
2	22	110	70	112	72	111	71	155	37	77	15.4	78	128.01	48	83.26	54.29	133.8	77	308	1.24	0.52	5.16	3	0.37	34.4	2	17.5	4.8	1	17.88	0	3.31117	0.869074	1.50854	1.40429	58.32	4.62145	0	0	0	0	0	0	0	147	7.86	242	0	0
2	34	80	50	90	55	85	52.5	157	52	75	21.1	0	176.46	66	92.64	40.72	41.8	70.14	346	1.02	0.82	5.4	3	0.24	71.1	3	14.07	5	2	31.82	0	4.56441	0.791648	3.14827	1.05329	121.712	5.1421	0	0	0	0	0	0	0	167	6.3	244	0	0
2	38	100	70	90	60	95	65	152	42	65	18.18	0	153.03	65	91	54.88	38.2	51.8	264	1.23	0.61	5.04	3	0.54	5.9	1	13.57	9.7	4	18.01	0	3.95835	0.58465	2.27082	1.41956	87.79	5.05107	0	0	0	0	0	0	0	147	13	300	0	0
2	32	120	80	122	81	121	80.5	158	54	86	21.63	0	151.02	53	89.86	48.97	33.1	55.23	319	1.23	0.67	5.12	3	0.3	43.8	3	10	6.1	3	20.89	0	3.90636	0.623363	2.35396	1.26668	91.004	4.98779	0	0	0	0	0	0	0	161	6.77	256	0	0
2	43	100	70	100	71	100	70.5	160	44	67	17.19	78	172.85	57	80.9	63.81	108.4	60.7	286	1.48	0.65	4.83	3	0.54	5.9	1	12.59	6.3	3	20.45	0	4.47103	0.685102	2.50647	1.65054	96.9	4.49045	0	0	0	0	0	0	0	79	6.33	403	0	0
2	31	110	80	100	70	105	75	162	48	70	18.29	0	125.58	61	49.68	56.9	431	42.17	325	1.26	0.5	4.65	3	0.21	21.1	2	13.84	4.7	1	14.38	0	3.24832	0.475959	1.55835	1.47181	60.246	2.75755	0	0	0	0	0	0	0	145	6.41	248	0	0
2	29	110	80	100	65	105	72.5	155	41	60	17.07	80	160.79	60	79.03	81.22	108.7	73.01	233	1.68	0.57	5.54	4	0.38	31.4	2	14.73	4.8	1	19.11	0	4.15908	0.824041	1.6805	2.10088	64.968	4.38666	0	0	0	0	0	0	0	156	9.69	363	0	0
2	22	110	70	100	60	105	65	157	45	62	18.26	81	117.54	63	87.46	41.21	144.5	44.21	290	0.95	0.55	5.35	3	0.38	40.3	2	9.66	5.3	2	15.9	0	3.04035	0.498984	1.74568	1.06596	67.488	4.85457	0	0	0	0	0	0	0	148	7.68	271	0	0
2	47	170	110	160	105	165	107.5	165	76	85	27.92	88	167.66	38	280.62	33.89	281.3	109.05	289	1.01	0.86	7.87	4	1.68	4.4	1	14.39	7.3	4	46.84	0	4.33678	1.23081	2.89602	0.876617	111.96	15.5762	0	1	1	1	1	0	0	102	11.05	415	0	0
1	49	110	80	100	70	105	75	154	55	86	23.19	80	155.32	88	93.44	70.86	329.4	33.28	346	1.48	0.62	5.31	3	0.5	9.3	1	20.59	5.2	2	21.35	0	4.01759	0.375621	2.01252	1.8329	77.804	5.1865	0	0	0	0	0	0	1	133	5.97	401	0	0
2	52	140	100	130	90	135	95	169	69	83	24.16	80	174.59	54	101.98	51.58	85	72.37	260	1.32	0.78	1.49	1	0.51	215	4	14.45	5.8	3	27.16	0	4.51604	0.816817	2.80745	1.3342	108.536	5.66052	0	0	0	1	0	0	0	154	7.18	328	0	0
2	29	110	80	100	70	105	75	156	63	80	25.89	80	166.62	58	89.68	31.55	113.1	123.69	300	0.97	0.82	0.48	1	0.69	19.6	2	15.59	8	4	42.86	0	4.30988	1.39605	2.85391	0.816089	110.332	4.9778	0	1	0	0	0	0	0	180	5.75	203	0	0
2	54	120	70	110	60	115	65	153	49	75	20.93	81	203.63	54	97.01	43.31	68.7	139.34	326	1.18	0.89	3.77	2	0.32	181.7	4	16.67	7.1	4	47.3	0	5.2672	1.57269	3.42607	1.12028	132.452	5.38466	0	0	0	0	0	0	0	165	8.12	243	0	0
2	18	120	80	110	70	115	75	160	46	68	17.97	0	176.6	54	92.91	53.99	571.2	75.61	277	1.27	0.73	4.65	3	0.31	28.5	2	11.72	13.8	4	29.11	0	4.56803	0.853386	2.78034	1.39653	107.488	5.15708	0	0	0	0	0	0	0	145	5.47	218	0	0
1	35	110	80	100	70	105	75	176	77	95	24.86	79	230.87	80	104.37	57.07	577	194.46	508	1.5	1	4.95	3	0.29	227.8	3	29.28	5.3	3	68.5	1	5.97181	2.19481	3.4896	1.4762	134.908	5.79318	0	0	0	0	0	0	1	174	6.04	204	0	0
2	57	140	90	130	80	135	85	167	70	90	25.1	78	234.27	69	95.38	40.33	474.1	195.76	279	1.11	1.08	3.92	2	0.38	103.6	3	18.98	6.1	3	68.96	1	6.05975	2.20948	4.00383	1.0432	154.788	5.29418	1	0	0	1	0	0	0	177	6.87	269	0	0
2	31	120	75	110	65	115	70	152	47	70	20.34	88	168.42	54	92.5	51.8	204.4	78.11	244	1.23	0.73	4.89	3	0.39	46.3	3	9.45	5.4	2	31.97	0	4.35644	0.881603	2.61247	1.33989	100.998	5.13433	0	0	0	0	0	0	0	142	7.69	295	0	0
2	41	140	90	130	80	135	85	159	62	80	24.52	0	221.58	71	79.34	40.69	20.3	104.79	363	1.12	1	0.96	1	0.56	99.5	3	17.03	5.3	2	51.53	0	5.73151	1.18273	4.13689	1.05251	159.932	4.40386	0	0	0	0	0	0	0	154	6.38	236	0	0
1	19	120	80	110	70	115	75	170	63	51	21.8	88	114.42	85	94.65	36.66	27.3	87.75	404	1	0.51	4.26	2	0.34	110.8	1	22.52	7	4	22.9	0	2.95965	0.990406	1.55742	0.948267	60.21	5.25366	0	1	0	0	0	0	0	167	5.45	227	0	0
1	25	140	80	130	75	135	77.5	181	62	77	18.92	88	144.58	80	89.13	37.48	24.5	99.51	353	1.01	0.69	4.83	3	0.2	195.1	2	19.43	5	2	39.2	0	3.73978	1.12314	2.25551	0.969477	87.198	4.94727	0	1	0	0	0	1	0	188	6.61	218	0	0
1	29	110	80	110	80	110	80	170	55	68	19.03	83	171.26	79	130.41	37.67	64.2	132.86	285	1.05	0.8	5.2	3	0.26	177.3	2	45.08	4.6	1	39.96	0	4.4299	1.49955	2.76818	0.974392	107.018	7.23857	0	1	0	0	1	1	0	171	7.86	301	0	0
2	31	110	70	100	60	105	65	154	45	73	18.97	82	124.13	66	86.66	59.35	21.9	37.45	249	1.26	0.49	12.08	4	0.38	19.1	2	13.1	21.1	4	15.22	0	3.21081	0.422686	1.48189	1.53518	57.29	4.81017	0	0	0	0	0	0	0	146	8.47	288	0	0
1	30	120	80	110	70	115	75	168	64	85	22.68	82	228.93	78	89.55	37.78	82.1	177.78	420	1.04	1.11	2.23	1	0.24	206.4	3	19.57	5.6	3	77.88	1	5.92162	2.00655	4.02468	0.977237	155.594	4.97058	0	1	0	0	0	1	1	184	9.98	282	0	0
1	62	160	110	150	100	155	105	167	69	68	24.74	98	119.69	80	103.09	34.94	63.5	134.43	318	1.01	0.53	19.19	4	0.54	166.4	2	50.9	18.5	4	18.69	0	3.09596	1.51727	1.49674	0.903777	57.864	5.72214	0	1	0	1	0	0	0	161	9.67	313	0	0
2	47	130	90	120	80	125	85	145	56	78	26.63	90	268.72	89	82.12	61.42	63.5	98.68	265	1.22	1.08	42.71	4	0.24	182.8	4	25.41	359.2	4	68.7	1	6.95085	1.11377	4.85163	1.58872	187.564	4.55817	0	1	0	0	0	0	0	130	8.15	169	1	1
1	22	120	80	110	70	115	75	175	63	76	20.57	88	172.44	91	91.87	59.37	32.2	137.58	381	1.45	0.68	3.35	2	0.36	95.4	1	25.83	5.3	3	35.63	0	4.46042	1.55282	2.21298	1.5357	85.554	5.09936	0	0	0	0	0	1	1	194	6.13	170	0	0
1	21	110	80	100	70	105	75	189	78	80	21.84	0	146.38	88	81.39	46.03	222.3	130.45	471	1.24	0.67	2.82	2	0.31	159.9	2	20.79	4.9	2	35.52	0	3.78634	1.47235	1.92085	1.19064	74.26	4.51765	0	0	0	0	0	0	0	178	9.77	229	0	0
1	77	130	80	120	75	125	77.5	169	62	85	21.71	0	191.36	84	123.64	43.48	30.2	91.18	276	1.08	0.85	4.44	3	0.64	700.4	4	26.99	5.9	3	35.69	0	4.94982	1.02912	3.35344	1.12468	129.644	6.86279	0	0	0	0	0	0	0	158	6.31	152	0	0
2	74	140	90	130	80	135	85	158	50	85	20.03	92	229.56	85	91.73	62.66	32.5	94.04	329	1.54	0.94	2.68	1	0.42	278.3	4	20.12	6.5	3	44.61	0	5.93792	1.0614	3.83063	1.6208	148.092	5.09159	1	0	0	1	0	0	0	160	6.34	192	0	0
2	35	120	75	110	60	115	67.5	152	49	70	21.21	0	194.48	73	93.23	49.06	455.3	64.59	292	1.17	0.87	2.56	1	0.33	88.8	3	13.77	7	3	37.54	0	5.03052	0.729007	3.42737	1.26901	132.502	5.17484	0	0	0	0	0	0	0	148	6.92	261	0	0
2	44	145	95	130	85	137.5	90	163	80	90	30.11	88	181.66	66	93.61	41.8	94	149.72	231	1.21	0.81	3.07	2	0.35	8.8	1	16.42	5.6	3	49.41	0	4.69891	1.68984	2.84315	1.08122	109.916	5.19594	0	0	0	1	0	0	0	118	8.53	355	0	0
2	76	180	110	170	100	175	105	154	41	75	17.29	98	228.86	85	89.3	62.14	817.4	110.44	307	1.4	0.97	4.34	2	0.6	159.3	4	20.22	6	3	48.01	0	5.91981	1.2465	3.74113	1.60735	144.632	4.95671	0	0	0	1	0	0	0	172	5.7	248	0	0
1	62	120	70	110	60	115	65	170	60	82	20.76	88	134.11	62	74.2	53.58	53.6	55.14	273	1.19	0.54	4.83	3	4.12	171.3	2	21.76	4.4	1	14.35	0	3.46896	0.622348	1.79778	1.38593	69.502	4.11856	0	0	0	0	0	0	1	208	5.97	160	0	0
2	58	120	80	110	70	115	75	164	52	86	19.33	88	143.68	68	88.89	42.91	356.5	82.28	287	1.07	0.67	5.78	4	0.24	57.2	3	23.74	4.7	1	32.96	0	3.7165	0.928668	2.18091	1.10993	84.314	4.93395	0	0	0	0	0	0	0	154	5.84	195	0	0
1	37	110	80	100	70	105	75	172	71	80	24	88	121.77	91	76.42	37.71	99.4	56.53	356	0.98	0.61	0.39	1	0.44	111.3	1	23.57	4.8	2	31.7	0	3.14977	0.638036	1.88189	0.975427	72.754	4.24179	0	1	0	0	0	0	0	155	5.81	196	0	0
2	32	110	80	100	70	105	75	161	48	76	18.52	0	132.45	73	74.03	60.16	101.6	63.76	284	1.29	0.49	4.83	3	0.36	33.4	2	12.49	4.9	2	14.63	0	3.42602	0.719639	1.54004	1.55613	59.538	4.10913	0	0	0	0	0	0	0	160	9.58	307	0	0
2	72	130	80	110	70	120	75	151	35	66	15.35	66	257.07	58	88.26	89.73	62.9	85.15	234	1.99	0.9	0.93	1	0.65	21.1	2	32.58	6.8	3	48.27	0	6.64951	0.961061	3.888	2.321	150.31	4.89898	0	1	0	0	0	0	0	159	7.12	163	1	0
2	31	120	80	110	70	115	75	142	49	91	24.3	72	180.83	62	92.6	72.33	179.8	111.27	299	1.93	0.76	1.55	1	0.71	18.2	2	8.65	5	2	29.59	0	4.67744	1.25587	2.23088	1.87093	86.246	5.13988	0	0	0	0	0	0	0	157	6.32	215	0	0
1	32	110	80	100	60	105	70	172	68	72	22.99	48	114.49	97	83.4	39.57	317.2	72.83	343	1.02	0.53	4.58	3	0.2	273.4	3	16.23	5.9	3	20.77	0	2.96146	0.822009	1.56115	1.02354	60.354	4.62922	0	1	0	0	0	1	0	177	5.7	116	0	0
1	34	120	75	110	65	115	70	178	76	88	23.99	54	205.5	73	95.76	68.81	42.7	92.47	399	1.62	0.87	1	1	0.47	435	4	25.73	7	4	40.82	0	5.31557	1.04368	3.05732	1.77988	118.196	5.31528	0	0	0	0	0	1	1	185	8.1	265	0	0
1	27	120	80	110	70	115	75	181	65	78	19.84	50	141.87	93	84.44	46.44	789.4	59.31	388	1.12	0.62	5.76	4	0.07	393.7	4	16.89	4.5	1	28.84	0	3.66968	0.669413	2.16161	1.20124	83.568	4.68694	0	0	0	0	0	1	0	174	6.31	223	0	0
2	27	120	80	110	70	115	75	169	53	69	18.56	69	111.58	50	78.44	51.97	125.9	64.4	246	1.29	0.51	10.87	4	0.58	8.8	1	10	6.7	3	17.3	0	2.88619	0.726862	1.20874	1.34428	46.73	4.35391	0	0	0	0	0	0	0	101	9.98	277	0	0
1	43	120	70	110	65	115	67.5	168	48	78	17.01	57	132.1	81	84.82	45.8	69.3	83.02	329	1.18	0.57	5.36	4	0.31	216.7	3	19.12	5.2	2	22.21	0	3.41697	0.93702	1.80279	1.18469	69.696	4.70804	0	0	0	0	0	1	1	175	12.31	381	0	0
2	35	130	80	120	70	125	75	165	51	73	18.73	63	175.21	58	80.52	58.73	279	58.2	248	1.21	0.72	5.76	4	0.18	5.9	1	15.34	4.5	1	26.97	0	4.53207	0.656885	2.71185	1.51914	104.84	4.46936	0	0	0	0	0	0	0	126	3.23	211	0	0
1	64	120	80	110	70	115	75	152	46	75	19.91	64	210.63	139	86.94	42.41	238.6	100.16	461	1.14	0.99	17.78	4	0.57	283.9	3	30.01	6	3	46.98	0	5.44827	1.13047	3.83311	1.097	148.188	4.82571	0	0	0	0	0	1	0	171	9.03	224	0	0
1	69	140	90	130	80	135	85	166	73	101	26.49	60	171.05	99	88.51	37.51	83.4	89.41	437	1.1	0.81	12.47	4	0.56	212.1	3	28.13	13.4	4	35.1	0	4.42447	1.00914	2.99167	0.970253	115.658	4.91286	0	1	0	0	0	0	0	161	6.18	275	0	0
2	33	120	80	110	70	115	75	174	53	71	17.51	65	131.41	64	93.44	55.26	404.1	44.3	223	1.2	0.54	5.4	3	0.23	5.9	1	18.28	4.7	1	17.7	0	3.39912	0.5	1.74056	1.42938	67.29	5.1865	0	0	0	0	0	0	0	99	6.91	304	0	0
2	48	130	80	120	70	125	75	152	55	82	23.81	73	167.52	66	95.97	39.44	436.3	123.13	264	1.2	0.78	2.95	2	0.38	99	3	15.69	8.1	4	40.24	0	4.33316	1.38973	2.676	1.02018	103.454	5.32693	0	1	0	0	0	0	0	173	7.74	273	0	0
2	31	100	70	90	60	95	65	155	51	69	21.23	60	181.03	66	89.58	61.48	35.4	60.61	273	1.38	0.71	3.81	2	0.28	12.8	2	19.3	6.9	3	26.3	0	4.68262	0.684086	2.77879	1.59027	107.428	4.97225	0	0	0	0	0	0	0	143	5.43	202	0	0
1	36	110	80	100	70	105	75	168	47	66	16.65	67	161.84	74	89.34	35.22	17.7	82.84	316	0.99	0.72	3.41	2	0.38	269.7	3	21.06	4.9	2	34.88	0	4.18624	0.934989	2.84666	0.911019	110.052	4.95893	0	1	0	0	0	0	0	171	12.51	274	0	0
1	62	140	90	130	80	135	85	159	48	69	18.99	59	198.78	88	79.16	56.71	40.5	79.5	268	1.36	0.85	5.25	3	0.22	102	1	19.74	5.3	3	31.26	0	5.14175	0.897291	3.26358	1.46689	126.17	4.39387	1	0	0	1	0	0	0	176	4.84	179	0	0
1	65	160	100	150	90	155	95	167	63	75	22.59	87	198.98	82	89.37	34.33	54.3	272.08	540	1.05	0.91	1.4	1	0.33	473.1	4	22.06	6.9	4	62.65	1	5.14692	3.07088	2.85137	0.887998	110.234	4.96059	0	1	0	1	0	0	0	179	6.91	183	0	0
1	45	110	80	100	70	105	75	170	64	80	22.15	68	170.22	79	94.41	31.63	204.1	131.74	323	0.97	0.86	9.09	4	0.42	86.2	1	15.52	5.3	3	38.49	0	4.403	1.48691	2.90331	0.818158	112.242	5.24034	0	1	0	0	0	1	1	186	8.81	207	0	0
2	49	140	90	130	80	135	85	165	74	95	27.18	65	174.79	60	94.2	42.46	682.4	74.03	293	1.12	0.77	2.86	2	0.33	165.8	4	13	6	3	28.17	0	4.52121	0.835553	3.03994	1.09829	117.524	5.22869	0	0	0	0	0	0	0	150	4.58	219	0	0
1	32	110	70	90	60	100	65	175	60	73	19.59	64	180.62	94	95.48	31.81	87.6	129.52	495	0.98	0.92	5.2	3	0.04	164.7	2	23.57	4.7	1	48.49	0	4.67201	1.46185	3.17915	0.822814	122.906	5.29973	0	1	0	0	0	0	0	180	7.02	261	0	0
2	40	130	90	120	80	125	85	169	52	61	18.21	61	154.21	56	92.39	50.18	145.8	50.13	305	1.07	0.67	4.93	3	0.44	32.9	2	15.37	7.7	4	19.83	0	3.98888	0.565801	2.43156	1.29798	94.004	5.12822	0	0	0	0	0	0	0	170	7.9	344	0	0
1	50	120	80	110	70	115	75	167	56	72	20.08	63	165.5	73	85.14	80.11	317	61.16	337	1.73	0.59	9.43	4	0.14	451.1	4	19.19	6.2	3	21.02	0	4.28091	0.690293	1.89234	2.07217	73.158	4.7258	0	0	0	0	0	1	1	164	6.18	249	0	0
2	53	120	70	110	60	115	65	161	60	87	23.15	67	160.03	44	104.55	36.87	12.9	174.91	289	1.26	0.7	4.77	3	0.36	13.7	2	4.06	6.9	3	38.25	0	4.13942	1.97415	2.28086	0.953699	88.178	5.80317	0	1	0	0	0	0	0	191	10.38	368	0	0
1	43	120	80	110	70	115	75	173	59	87	19.71	52	183.94	78	88.96	42.33	110.3	109.05	294	1.13	0.78	0.17	1	0.34	301	3	14.7	5.5	3	38.13	0	4.75789	1.23081	3.09881	1.09493	119.8	4.93783	0	0	0	0	0	0	0	181	9.29	308	0	0
2	55	120	70	110	60	115	65	164	51	76	18.96	65	140.27	55	89.02	51.01	234.4	77	296	1.27	0.53	0.37	1	0.33	57.7	3	16.7	8	4	16.73	0	3.6283	0.869074	1.9105	1.31945	73.86	4.94116	0	0	0	0	0	0	0	161	5.98	234	0	0
2	24	125	80	110	70	117.5	75	155	60	73	24.97	70	121.77	74	82.5	56.62	12.6	48.37	278	1.25	0.43	4.79	3	0.29	11.8	1	12.49	5.1	2	10.32	0	3.14977	0.545937	1.43497	1.46456	55.476	4.57926	0	0	0	0	0	0	0	150	7.64	262	0	0
1	40	120	80	110	70	115	75	176	58	87	18.72	59	153.79	71	77.88	42.54	106.4	165	289	1.25	0.62	0.69	1	0.36	209.8	3	14.98	10.5	4	34.8	0	3.97801	1.8623	2.02406	1.10036	78.25	4.32282	0	0	0	0	0	1	0	172	7.45	166	0	0
1	68	150	100	140	90	145	95	166	69	85	25.04	68	240.78	94	89.48	53.42	155.5	92.28	314	1.38	1.09	4.13	2	0.25	323.6	4	24.39	5.5	3	52.18	0	6.22814	1.04153	4.36896	1.38179	168.904	4.9667	0	1	0	1	0	1	0	178	6.39	177	1	1
2	30	120	80	110	70	115	75	167	44	83	15.78	81	177.91	62	88.33	44.7	158	57.36	190	1.06	0.76	4.96	3	0.17	18.7	2	12.12	4.5	1	24.51	0	4.60191	0.647404	3.14894	1.15623	121.738	4.90286	0	0	0	0	0	0	0	150	7.23	238	0	0
1	62	140	100	130	90	135	95	163	66	92	24.84	59	205.15	81	91.94	47.65	1064.1	88.11	361	1.16	0.96	1.04	1	0.34	176.2	2	21.56	5.4	3	39.71	0	5.30652	0.99447	3.61816	1.23254	139.878	5.10324	0	0	0	1	0	1	0	182	7.03	238	0	0
2	64	140	90	130	80	135	85	159	60	91	23.73	85	199.75	72	78.75	55.21	123	116.46	311	1.45	0.87	5.86	4	0.45	207.6	4	20.12	16	4	33.82	0	5.16684	1.31445	3.13626	1.42809	121.248	4.37111	0	0	0	0	0	0	0	189	9.31	181	0	0
2	38	140	90	130	80	135	85	156	47	73	19.31	69	182.63	61	83.82	74.01	572.9	49.76	211	1.58	0.69	5.8	4	0.4	9.3	1	15.05	4.8	1	23.04	0	4.724	0.561625	2.5522	1.91438	98.668	4.65253	0	0	0	0	0	0	0	109	6.13	344	0	0
1	43	130	90	120	80	125	85	173	71	91	23.72	56	217.56	96	100	59.4	112.2	73.2	429	1.55	0.86	4.96	3	0.34	153.4	2	20.25	8.3	4	34.25	0	5.62752	0.826185	3.71236	1.53647	143.52	5.55062	0	0	0	0	0	0	0	171	7.62	200	0	0
2	75	160	110	150	105	155	107.5	153	47	88	20.08	58	265.94	54	95.34	36.8	33.8	193.99	272	1.09	1.25	4.89	3	0.48	45.8	3	22.09	5.6	3	81.17	1	6.87894	2.1895	4.92349	0.951888	190.342	5.29196	1	1	0	1	0	0	0	148	6.36	254	1	1
1	36	120	85	118	86	119	85.5	171	65	89	22.23	53	222.9	116	104.2	50.36	429.5	119.89	386	1.42	0.99	5.4	4	0.83	220.8	3	19.71	6.8	4	50.84	0	5.76565	1.35316	3.84278	1.30264	148.562	5.78375	0	0	0	0	0	1	1	169	6.59	200	0	0
1	61	140	110	150	100	145	105	159	45	61	17.8	58	221.72	60	93.12	0.39	275.2	81.17	393	1.55	0.95	5.17	3	0.48	163.1	2	27.79	5.9	3	46.15	0	5.73513	0.91614	5.30512	0.0100879	205.096	5.16874	1	1	0	1	0	0	0	161	5.61	234	0	1
2	61	120	70	110	75	115	72.5	158	40	82	16.02	60	235.24	68	89.58	44.44	895.5	112.39	317	1.3	1.13	4.01	2	0.33	158.8	4	19.47	5.1	2	57.73	1	6.08484	1.26851	4.35391	1.14951	168.322	4.97225	0	1	0	0	0	0	0	166	4.32	199	0	1
1	30	120	80	110	70	115	75	171	56	76	19.15	0	169.18	64	91.21	35.82	170.8	136.19	330	1.05	0.77	4.88	3	0.26	27	1	11.51	4.6	1	45.63	0	4.3761	1.53713	2.74501	0.926539	106.122	5.06272	0	1	0	0	0	1	0	185	5.45	253	0	0
1	41	110	80	100	70	105	75	162	69	84	26.29	58	199.54	84	88.71	40.71	74.1	129.06	366	1.15	0.84	2.67	2	0.27	134.2	2	17.89	4.8	2	43.12	0	5.16141	1.45666	3.44071	1.05303	133.018	4.92396	0	0	0	0	0	1	0	185	7.79	343	0	0
1	31	120	80	110	70	115	75	169	57	90	19.96	63	192.4	85	96.84	51.65	550.1	50.51	368	1.24	0.8	4.44	3	0.28	149.6	2	17.43	5.3	3	34.11	0	4.97672	0.57009	3.37941	1.33601	130.648	5.37522	0	0	0	0	0	0	0	175	8.18	269	0	0
2	34	100	70	90	60	95	65	144	34	77	16.4	58	163.64	65	89.79	71.04	23.8	59.95	279	1.53	0.6	5.86	4	0.2	5.9	1	14.88	4.8	1	20.78	0	4.2328	0.676637	2.0851	1.83756	80.61	4.9839	0	0	0	0	0	0	0	122	4.7	251	0	0
1	53	130	90	120	80	125	85	183	74	90	22.1	58	170.43	80	93.09	38.91	214.8	73.76	312	1.08	0.84	3.96	2	0.42	257.5	3	19.6	9	4	39.18	0	4.40843	0.832506	3.02038	1.00647	116.768	5.16707	0	1	0	0	0	1	0	189	6.78	242	0	0
2	54	120	90	110	80	115	85	57	163	72	501.69	61	169.39	65	97.57	46.92	20.6	75.24	294	1.17	0.76	0.61	1	0.22	143.8	4	13.6	7.7	4	32.96	0	4.38153	0.84921	2.77863	1.21366	107.422	5.41574	0	0	0	0	0	0	0	169	5.58	595	0	0
1	43	130	90	120	80	125	85	171	66	94	22.57	62	164.81	92	101.39	46.72	10.4	55.97	410	1.22	0.77	4.85	3	0.09	73.7	1	14.66	5.1	2	30.38	0	4.26306	0.631716	2.76503	1.20848	106.896	5.62778	0	0	0	0	0	1	0	176	7.22	247	0	0
2	38	120	80	110	70	115	75	161	64	97	24.69	58	174.31	69	75.52	29.35	710	183.62	290	0.93	0.86	4.06	2	0.62	42.3	3	13.87	5.6	3	53.24	0	4.50879	2.07246	2.79969	0.759183	108.236	4.19183	0	1	0	0	0	0	0	154	5.97	261	0	0
1	27	110	70	90	60	100	65	177	56	75	17.87	75	133.69	81	84.62	44.88	150.2	56.81	333	1.15	0.59	4.99	3	0.2	194	2	15.37	5.5	3	23.57	0	3.4581	0.641196	2.00331	1.16089	77.448	4.69694	0	0	0	0	0	1	0	185	7.57	254	0	0
1	29	120	80	110	70	115	75	183	59	70	17.62	58	154.63	80	77.95	39.29	10.7	103.03	318	1.09	0.69	4.91	3	0.2	417.7	4	14.91	5.1	2	36.78	0	3.99974	1.16287	2.45044	1.0163	94.734	4.32671	0	1	0	0	0	1	0	171	8.3	308	0	0
1	27	110	80	100	70	105	75	171	56	85	19.15	58	160.31	86	80.07	37.39	29.6	79.22	344	0.96	0.76	11.43	4	0.11	253.9	3	19.57	31	4	28.43	0	4.14666	0.894131	2.76968	0.96715	107.076	4.44438	0	1	0	0	0	1	0	154	8.88	251	0	0
2	24	120	80	110	70	115	75	164	46	72	17.1	59	142.22	55	73.4	55.73	53.6	55.88	328	1.22	0.59	4.49	2	0.2	72.2	3	10.59	5.2	2	16.16	0	3.67874	0.6307	1.94811	1.44154	75.314	4.07416	0	0	0	0	0	0	0	160	7.68	267	0	0
1	38	120	80	110	70	115	75	168	58	76	20.55	53	146.79	66	96.84	32.21	13.9	162.96	226	0.96	0.64	5.21	3	0.24	59.7	1	21.03	4.6	1	32.72	0	3.79695	1.83928	2.12074	0.833161	81.988	5.37522	0	1	0	0	0	1	0	171	4.33	196	0	0
2	36	90	60	80	50	85	55	146	37	73	17.36	58	232.95	68	83.78	54.95	790.3	151.29	408	1.57	1.17	6.26	4	0.62	39.3	2	18.74	6.7	3	66.97	1	6.02561	1.70756	3.82157	1.42137	147.742	4.65031	0	0	0	0	0	0	0	129	9.29	398	0	0
2	39	110	80	100	70	105	75	154	60	94	25.3	60	195.17	57	87.05	60.48	135	95.8	290	1.54	0.76	3.47	2	0.53	19.1	2	15.3	5.6	3	43.11	0	5.04837	1.08126	2.98836	1.56441	115.53	4.83182	0	0	0	0	0	0	0	129	7.28	300	0	0
1	40	120	80	110	70	115	75	165	77	100	28.28	76	211.46	78	89.1	40.01	45.9	206.78	373	1.18	1.02	3.98	2	0.25	322.3	4	20.35	5.7	3	60.53	1	5.46974	2.33386	3.36508	1.03492	130.094	4.9456	0	1	0	0	0	1	0	210	6.81	223	0	0
1	72	140	90	130	80	135	85	196	121	130	31.5	79	148.25	82	95.45	24.64	93.3	124.71	450	0.78	0.76	4.75	3	0.55	10.8	1	19.5	5.1	2	37.97	0	3.83471	1.40756	2.5522	0.637351	98.668	5.29807	1	1	0	1	0	0	0	174	12.75	255	0	0
2	71	140	90	130	80	135	85	153	49	85	20.93	58	171.4	68	95.76	54.09	110.9	61.99	303	1.29	0.72	4.25	2	0.56	114.4	3	15.16	4.7	1	24.99	0	4.43352	0.699661	2.71371	1.39912	104.912	5.31528	0	0	0	0	0	0	0	135	7.22	267	0	0
1	29	120	80	110	70	115	75	174	66	85	21.8	51	182.98	89	87.91	33.5	141.1	135.27	403	1.03	0.88	0.42	1	0.12	368.2	4	17.82	5.2	2	46.88	0	4.73306	1.52675	3.16674	0.866529	122.426	4.87955	0	1	0	0	0	1	0	187	6.98	202	0	0
1	29	120	80	110	70	115	75	174	55	89	18.17	58	160.1	66	79.41	54.26	29.6	106.18	294	1.38	0.61	3.77	2	0.09	207	3	20.93	5.3	3	25.17	0	4.14123	1.19842	2.18841	1.40352	84.604	4.40775	0	0	0	0	0	1	0	116	5.78	302	0	0
1	73	130	80	120	70	125	75	163	73	110	27.48	58	201.07	91	89.62	55.13	76.7	52.45	452	1.26	0.82	8.35	4	0.83	238.9	3	24.95	5.9	3	30.25	0	5.20098	0.591986	3.50362	1.42602	135.45	4.97447	1	0	0	1	0	0	0	199	6.5	271	0	0
1	20	120	80	110	70	115	75	171	70	92	23.94	59	173.62	76	89.55	32.19	174.5	103.12	377	0.97	0.86	4.64	3	0.35	74.7	1	17.5	5	2	43.37	0	4.49095	1.16388	3.12483	0.832644	120.806	4.97058	0	1	0	0	0	0	0	148	5.49	209	0	0
2	34	120	80	110	70	115	75	168	66	92	23.38	64	163.29	80	92.95	55.83	340.2	78.95	289	1.33	0.65	5.33	3	0.62	2.5	1	14.52	5.3	2	23.93	0	4.22375	0.891084	2.37118	1.44413	91.67	5.1593	0	0	0	0	0	0	0	182	9.83	318	0	0
1	32	110	80	100	70	105	75	173	65	75	21.72	59	169.74	81	89.93	47.75	199.6	78.48	284	1.19	0.78	2.44	1	0.28	155.5	2	14.28	6.8	4	34.14	0	4.39058	0.885779	2.74946	1.23513	106.294	4.99167	0	0	0	0	0	1	1	175	6.96	310	0	0
1	34	120	70	110	60	115	65	166	62	83	22.5	66	219.23	64	92.12	48.75	120.8	191.49	412	1.33	0.91	5.2	3	0.4	264.2	3	12.59	8.6	4	64.61	1	5.67072	2.16129	3.41909	1.26099	132.182	5.11323	0	0	0	0	0	1	1	154	5.99	272	0	0
1	37	110	80	100	70	105	75	179	75	97	23.41	60	187.07	79	84.72	51.56	345.7	76.54	451	1.29	0.85	4.75	3	0.24	282.7	3	16.34	5	2	37.24	0	4.83885	0.863883	3.10921	1.33368	120.202	4.70249	0	0	0	0	0	1	1	183	6.09	237	0	0
1	53	110	70	100	60	105	65	170	57	74	19.72	58	163.78	64	81.77	39.02	152.4	51.9	280	1.01	0.8	2.67	2	0.29	272.7	3	17.03	11.7	4	30.7	0	4.23642	0.585779	2.95861	1.00931	114.38	4.53874	0	1	0	0	0	0	0	168	8.11	188	0	0
2	51	140	100	130	90	135	95	151	60	95	26.31	58	235.03	58	83.16	45.41	748.4	101.46	378	1.26	1.07	1.81	1	0.29	108.2	3	16.78	7.2	4	58.57	1	6.07941	1.14515	4.37993	1.1746	169.328	4.6159	0	1	0	1	0	0	0	166	6.96	249	0	1
1	70	160	100	150	90	155	95	163	53	89	19.95	58	205.43	82	64.37	59.15	177.9	78.39	363	1.3	0.88	4.41	3	0.38	168.5	2	19.88	5.4	3	32.86	0	5.31376	0.884763	3.37822	1.53001	130.602	3.57294	1	0	0	1	0	0	0	175	8.05	155	0	0
1	19	110	70	100	60	105	65	172	58	70	19.61	90	158.16	90	84.13	42.75	50.4	80.24	570	1.05	0.7	5.87	4	0.13	135.8	2	33.9	4.7	1	30.13	0	4.09105	0.905643	2.57015	1.10579	99.362	4.66974	0	0	0	0	0	0	0	174	6.35	190	0	0
2	71	140	80	130	70	135	75	143	41	80	20.05	58	164.05	60	94.93	48.39	50.4	78.95	215	1.23	0.71	3.05	2	0.44	376.6	4	21.26	4.5	1	24.13	0	4.2434	0.891084	2.58329	1.25168	99.87	5.26921	0	0	0	0	0	0	0	150	7.12	246	0	0
1	31	120	80	110	70	115	75	175	54	80	17.63	58	185.4	80	73.33	54.03	97.8	105.81	314	1.35	0.77	5.31	3	0.15	161.5	2	14.91	5.6	3	30.41	0	4.79565	1.19424	2.8507	1.39757	110.208	4.07027	0	0	0	0	0	0	0	151	6.2	240	0	0
2	27	120	80	110	70	115	75	156	43	77	17.67	58	165.58	40	78.37	73.22	35.4	124.89	153	1.87	0.6	3.84	2	0.69	8.3	1	10.65	12.1	4	26.2	0	4.28298	1.40959	1.74294	1.89395	67.382	4.35002	0	0	0	0	0	0	0	124	10.82	245	0	0
1	28	110	70	100	60	105	65	177	56	75	17.87	58	157.26	73	69.41	46.18	126.8	187.14	288	1.42	0.65	5.63	4	0.33	159.9	2	17.32	5.1	2	40.64	0	4.06777	2.11219	1.90512	1.19452	73.652	3.85269	0	0	0	0	0	1	0	175	6.52	223	0	0
2	33	120	80	110	70	115	75	164	65	90	24.17	58	131.55	60	94.72	43.68	249.6	57.83	201	1.1	0.58	5.2	3	0.4	18.7	2	18.42	5.2	2	20.93	0	3.40274	0.652709	1.97372	1.12985	76.304	5.25755	0	0	0	0	0	0	0	153	9.33	278	0	0
2	37	120	70	110	60	115	65	160	46	72	17.97	78	142.29	53	81.11	52.37	66.1	78.21	180	1.25	0.56	5.6	4	0.51	25.5	2	12.43	4.7	1	21.71	0	3.68055	0.882731	1.92131	1.35463	74.278	4.50211	0	0	0	0	0	0	0	147	6.69	277	0	0
1	32	120	80	110	70	115	75	175	73	84	23.84	56	155.94	98	85.9	55.45	161.8	156.48	460	1.47	0.65	5.19	3	0.24	106.1	1	22.12	5.3	3	35.3	0	4.03363	1.76614	1.78981	1.4343	69.194	4.76798	0	0	0	0	0	1	0	146	6.18	217	0	0
2	36	120	80	110	70	115	75	163	63	93	23.71	82	153.31	64	84.03	51.21	226.4	66.44	293	1.21	0.64	3.63	2	0.36	10.3	1	13.2	7.1	4	23.15	0	3.9656	0.749887	2.29726	1.32462	88.812	4.66419	0	0	0	0	0	0	0	95	4.93	205	0	0
2	50	140	90	130	80	135	85	154	43	79	18.13	58	167.59	48	86.07	82.78	41.1	44.03	230	1.54	0.56	5.31	3	0.67	10.8	1	13.43	4.5	1	18.21	0	4.33497	0.496953	1.96596	2.14123	76.004	4.77742	0	0	0	0	0	0	0	177	9.53	244	0	0
1	25	120	80	110	70	115	75	160	57	86	22.27	60	163.85	66	93.05	51.79	24.8	95.81	363	1.18	0.7	3.7	2	0.23	317.8	4	18.14	4.7	1	31.91	0	4.23823	1.08138	2.40295	1.33963	92.898	5.16485	0	0	0	0	0	1	0	168	11.84	322	0	0
2	33	140	100	130	95	135	97.5	156	86	115	35.34	59	150.82	38	117.5	29.46	44.3	143.61	346	0.97	0.81	24.66	4	0.72	32.9	2	9.71	24	4	46.5	0	3.90119	1.62088	2.39622	0.762028	92.638	6.52198	0	1	0	1	0	0	0	186	6.99	241	0	0
1	30	120	80	110	80	115	80	181	82	89	25.03	58	202.52	94	94.55	61.7	209.7	148.88	480	1.64	0.9	4.69	3	0.23	221.9	3	21.83	5	2	54.44	1	5.23849	1.68036	2.87232	1.59596	111.044	5.24811	0	0	0	0	0	1	0	170	5.67	269	0	0
2	58	140	90	130	80	135	85	161	58	89	22.38	66	223.87	70	88.89	34.95	37.6	133.42	261	1	1.13	2.44	1	0.43	73.2	3	19.67	5	2	76.69	1	5.79074	1.50587	4.19648	0.904035	162.236	4.93395	0	1	0	0	0	0	0	187	8.9	245	0	1
1	40	120	70	110	60	115	65	173	72	100	24.06	58	220.55	91	74.13	37.65	225.2	172.14	453	1.12	1.04	4.64	3	0.65	574.8	4	22.06	4.9	2	61.06	1	5.70486	1.94289	3.84046	0.973875	148.472	4.11468	0	1	0	0	0	0	0	149	8.47	275	0	0
2	36	120	80	110	70	115	75	160	45	73	17.58	58	170.22	52	79.2	61.38	109.9	64.5	218	1.38	0.71	4.57	2	0.46	7.9	1	10.73	5.7	3	27.73	0	4.403	0.727991	2.48163	1.58769	95.94	4.39609	0	0	0	0	0	0	0	174	7.44	302	0	0
2	30	120	80	110	70	115	75	144	36	67	17.36	58	113.11	48	108.02	56.2	42.7	56.25	206	1.19	0.41	3.03	2	0.24	4.9	1	13.1	4.5	1	11.8	0	2.92576	0.634876	1.18107	1.4537	45.66	5.99578	0	0	0	0	0	0	0	122	5.66	256	0	0
2	51	130	80	120	70	125	75	156	58	90	23.83	60	196.63	62	110.63	52.47	800.3	103.4	255	1.32	0.83	3.69	2	0.02	163.1	4	17.39	5.3	2	35.45	0	5.08614	1.16704	3.194	1.35722	123.48	6.14065	0	0	0	0	0	0	0	163	4.62	220	0	0
2	30	120	80	110	70	115	75	156	46	70	18.9	80	156.78	56	117.01	50.03	360.6	90.53	247	1.2	0.66	5.54	4	0.45	10.3	1	11.48	4.5	1	25.93	0	4.05535	1.02178	2.29291	1.2941	88.644	6.49478	0	0	0	0	0	0	0	135	8.69	321	0	0
2	55	140	90	130	80	135	85	142	55	90	27.28	66	196.28	69	102.26	60.27	424.9	84.23	324	1.46	0.81	1.32	1	0.21	153.4	4	16.31	12.1	4	30.87	0	5.07708	0.950677	3.08236	1.55898	119.164	5.67607	0	0	0	0	0	0	0	161	5.95	248	0	0
2	33	120	80	110	70	115	75	160	52	78	20.31	53	220.68	70	95.24	56.6	851.2	123.13	351	1.56	0.98	3.58	2	0.24	3.4	1	15.66	6	3	63.03	1	5.70823	1.38973	3.60719	1.46405	139.454	5.28641	0	0	0	0	0	0	0	127	4.85	441	0	0
1	62	130	90	120	80	125	85	170	68	95	23.53	61	153.66	78	87.26	52.67	154.9	74.5	277	1.26	0.68	3.07	2	0.23	183.9	2	15.84	4.6	1	21.52	0	3.97465	0.840858	2.22685	1.36239	86.09	4.84347	0	0	0	0	0	0	1	158	4.56	227	0	0
1	36	100	80	90	60	95	70	164	61	80	22.68	48	193.03	106	95.42	37.97	31.5	197.43	385	1.13	0.89	5.37	4	0.21	346.3	4	18.81	5.1	2	60.28	1	4.99302	2.22833	2.9895	0.982152	115.574	5.2964	0	1	0	0	0	1	0	171	4.5	175	0	0
2	39	100	70	90	60	95	65	158	50	88	20.03	58	118.31	65	91.7	52.92	299.7	55.7	222	1.27	0.46	0.37	1	0.45	7.9	1	12.3	8	4	14.41	0	3.06027	0.628668	1.40326	1.36886	54.25	5.08992	0	0	0	0	0	0	0	126	5.8	238	0	0
1	34	120	80	110	70	115	75	176	66	82	21.31	58	140.21	85	83.47	35.1	51.1	102.75	350	1.03	0.73	5.36	4	0.41	401.6	4	14.84	4.8	2	37	0	3.62675	1.15971	2.18727	0.907915	84.56	4.6331	0	1	0	0	0	1	0	185	6.74	230	0	0
2	43	140	100	130	90	135	95	166	69	95	25.04	58	237.8	74	95.14	62.55	325.6	93.31	437	1.7	1.08	4.44	2	0.21	52.2	3	13.6	5.5	3	58.13	1	6.15106	1.05316	4.05039	1.61795	156.588	5.28086	0	0	0	1	0	0	0	174	6.98	270	0	0
1	27	120	80	110	60	115	70	181	55	81	16.79	58	167.52	87	90.38	55.24	79.9	81.54	483	1.33	0.71	5.32	4	0.12	233.6	3	21.63	4.5	1	30.51	0	4.33316	0.920316	2.48246	1.42887	95.972	5.01665	0	0	0	0	0	0	0	174	7.97	316	0	0
2	22	110	80	100	70	105	75	149	38	65	17.12	58	183.05	68	90.07	62.56	193.8	92.38	283	1.57	0.7	4.81	3	0.33	48.2	3	15.48	7.9	4	25.51	0	4.73487	1.04266	2.63875	1.61821	102.014	4.99944	0	0	0	0	0	0	0	149	7.81	276	0	0
1	56	130	80	120	70	125	75	169	57	74	19.96	56	192.47	77	87.5	49.97	177.9	143.33	290	1.29	0.8	2.27	1	0.41	169.6	2	20.22	5.6	3	43.11	0	4.97853	1.61772	2.94449	1.29255	113.834	4.85679	1	0	0	1	0	0	0	185	5.88	242	0	0
2	61	130	90	120	80	125	85	160	82	110	32.03	58	202.66	64	101.49	42.54	144.5	132.58	286	1.27	0.94	7.28	4	0.4	224.3	4	14.7	9.5	4	51.84	0	5.24211	1.49639	3.45587	1.10036	133.604	5.63333	1	0	0	1	0	0	0	147	4.85	247	0	0
2	28	120	80	110	70	115	75	160	55	68	21.48	80	114.22	79	83.16	42.14	57.5	62.09	271	1.05	0.48	5.07	3	0.31	4.4	1	16.38	4.7	1	15.02	0	2.95447	0.70079	1.54325	1.09002	59.662	4.6159	0	0	0	0	0	0	0	118	5.24	306	0	0
1	38	120	80	110	70	115	75	171	83	100	28.38	58	184.85	103	88.75	52.83	133.8	88.77	428	1.31	0.79	0.26	1	0.33	606.6	4	19.71	7.4	4	34.37	0	4.78143	1.00192	2.95566	1.36653	114.266	4.92618	0	0	0	0	0	0	0	162	4.46	202	0	0
1	61	140	90	130	85	135	87.5	172	61	80	20.62	58	153.52	74	88.68	47.58	93.7	62.83	290	1.15	0.64	4.69	3	0.01	48.2	1	25.96	5.1	2	21.62	0	3.97103	0.709142	2.41526	1.23073	93.374	4.92229	1	0	0	1	0	0	0	170	5.65	143	0	0
1	27	120	80	100	70	110	75	181	61	75	18.62	58	108.67	91	89.69	41.81	26.1	54.49	369	1.03	0.46	5.78	4	0.26	121.1	1	18.77	4.2	1	13.64	0	2.81092	0.615011	1.44754	1.08148	55.962	4.97835	0	0	0	0	0	0	0	165	6.02	191	0	0
1	18	120	90	110	80	115	85	178	61	78	19.25	58	113.11	70	93.19	39.49	55.2	96.36	441	1.04	0.51	5.16	3	0.25	27	1	21.36	8.3	4	18.66	0	2.92576	1.08758	1.40579	1.02147	54.348	5.17262	0	1	0	0	0	0	0	170	8.35	213	0	0
1	22	90	60	80	50	85	55	176	57	84	18.4	58	187	74	80.21	58.49	556	54.4	343	1.48	0.77	4.45	3	0.26	46.8	1	24.82	5.5	3	32.53	0	4.83704	0.613995	3.04268	1.51293	117.63	4.45215	0	0	0	0	0	0	0	160	6.46	270	0	0
2	33	120	90	110	70	115	80	156	54	73	22.19	58	151.44	61	89.69	52.66	169.6	63.39	282	1.32	0.65	5.68	4	0.26	45.3	3	13.47	5.3	2	20.71	0	3.91723	0.715463	2.22716	1.36213	86.102	4.97835	0	0	0	0	0	0	0	156	5.92	266	0	0
1	24	120	80	110	70	115	75	181	58	75	17.7	58	136.47	47	86.28	44.6	20.9	53.01	260	1.13	0.6	3.73	2	0.11	208.7	3	21.09	4.8	2	18.17	0	3.53001	0.598307	2.10212	1.15365	81.268	4.78908	0	0	0	0	0	0	0	178	5.57	220	0	0
2	33	130	90	120	80	125	85	167	62	78	22.23	58	156.85	51	88.78	63.85	119.8	56.35	253	1.3	0.59	5.7	4	0.2	8.3	1	10.82	4.4	1	23.74	0	4.05717	0.636005	2.11407	1.65158	81.73	4.92784	0	0	0	0	0	0	0	154	6.16	206	0	0
2	22	100	70	90	60	95	65	150	42	68	18.67	58	179.16	88	86.81	78.76	272.9	89.79	295	1.83	0.6	4.68	3	0.59	2.5	1	20.99	7.9	4	21.16	0	4.63425	1.01343	2.13249	2.03725	82.442	4.81849	0	0	0	0	0	0	0	126	4.79	190	0	0
1	42	130	90	120	80	125	85	167	56	80	20.08	58	142.57	71	98.65	44.34	144.2	48.94	314	1.05	0.66	5.56	4	0.36	116.5	1	19.4	4.7	1	26.12	0	3.68779	0.55237	2.28769	1.14692	88.442	5.47569	0	0	0	0	0	0	1	141	5.43	277	0	0
2	30	120	80	110	70	115	75	157	53	73	21.5	58	155.46	64	82.88	40.59	41.8	77	304	1.17	0.72	5.05	3	0.33	4.9	1	9.74	4.7	1	35.4	0	4.02121	0.869074	2.57294	1.04992	99.47	4.60036	0	0	0	0	0	0	0	136	6.49	250	0	0
2	33	120	80	110	70	115	75	161	59	74	22.76	58	163.57	55	82.01	46.91	133.8	46.53	232	1.17	0.71	5.52	4	0.34	16.7	2	13.43	6.8	3	30.39	0	4.23099	0.525169	2.77688	1.2134	107.354	4.55206	0	0	0	0	0	0	0	144	3.97	247	0	0
1	29	110	80	100	70	105	75	179	71	80	22.16	58	150.26	71	96.32	31.1	14.2	107.2	348	0.92	0.76	5.84	4	0.15	253.9	3	14.11	4.3	1	43.88	0	3.8867	1.20993	2.52768	0.804449	97.72	5.34636	0	1	0	0	0	0	0	138	7.28	334	0	0
1	59	150	100	140	90	145	95	171	68	88	23.26	58	226.23	70	92.74	48.05	98.5	222.99	340	1.34	1.12	5.23	3	0.26	272.1	3	19.05	5	2	69.97	1	5.85178	2.51682	3.4553	1.24289	133.582	5.14765	1	1	0	1	0	1	0	180	6.06	210	0	0
2	27	100	70	90	60	95	65	155	58	75	24.14	58	198.64	58	92.5	56.36	167.7	49.96	269	1.33	0.83	4.57	2	0.27	24.6	2	11.19	7.2	4	36.72	0	5.13813	0.563883	3.42183	1.45784	132.288	5.13433	1	0	0	1	0	0	0	154	10.83	262	0	0
2	53	130	90	120	80	125	85	155	48	85	19.98	58	178.75	60	90.42	43.91	3.7	71.45	241	1.16	0.81	5.05	3	1.63	209.3	4	13.77	5.9	3	32.91	0	4.62364	0.806433	3.11821	1.1358	120.55	5.01887	0	0	0	0	0	0	0	141	6.3	297	0	0
2	25	120	80	110	70	115	75	165	52	85	19.1	58	157.54	65	95.14	56.71	56.2	54.87	327	1.29	0.63	2.23	1	0.17	34.9	2	15.05	4.9	2	20.46	0	4.07501	0.6193	2.32426	1.46689	89.856	5.28086	0	0	0	0	0	0	0	148	6.59	208	0	0
2	31	110	70	100	60	105	65	157	48	80	19.47	58	141.04	55	79.41	69.82	182.5	34.49	245	1.43	0.49	1.73	1	0.35	25	2	13.33	6.1	3	12.58	0	3.64822	0.389278	1.66379	1.806	64.322	4.40775	0	0	0	0	0	0	0	149	6.21	247	0	0
1	41	120	80	110	70	115	75	161	54	87	20.83	65	208.9	68	97.95	65.41	87.6	148.61	572	1.71	0.85	5.37	4	0.2	127.9	1	20.05	5.1	2	55.83	1	5.40352	1.67731	2.94278	1.69193	113.768	5.43683	0	0	0	0	0	0	1	157	7.16	420	0	0
1	67	180	120	170	110	175	115	174	74	87	24.44	81	192.06	94	88.51	40.72	62.6	154.17	398	1.22	0.84	0.88	1	0.47	398.7	4	22.02	6	3	50.26	0	4.96793	1.74007	3.11707	1.05329	120.506	4.91286	1	0	0	1	0	0	0	175	8.37	240	0	0
2	48	130	90	120	80	125	85	157	59	90	23.94	49	192.19	64	85.17	67.95	110.6	84.51	269	1.44	0.72	3.96	2	0.42	44.8	3	20.69	5.6	3	29.92	0	4.97129	0.953837	2.77646	1.75763	107.338	4.72746	0	0	0	0	0	0	0	152	6.01	195	0	0
2	39	120	80	110	70	115	75	158	57	70	22.83	0	143.95	74	83.13	53.53	21.9	68.3	234	1.16	0.58	1.92	1	0.26	60.2	3	17.35	4.9	2	15.89	0	3.72349	0.77088	1.98551	1.38464	76.76	4.61423	0	0	0	0	0	0	0	153	6.31	209	0	0
1	44	120	90	110	80	115	85	160	45	77	17.58	66	151.58	69	82.01	0.36	63.2	121.38	251	1.02	0.69	4.53	3	0.38	74.7	1	22.39	5.5	3	29.89	0	3.92085	1.36998	3.2836	0.00931195	126.944	4.55206	0	1	0	0	0	1	0	162	8.86	246	0	0
2	33	120	80	110	70	115	75	162	74	88	28.2	58	171.26	59	94.62	48.6	56.8	70.06	253	1.17	0.73	0.86	1	0.36	51.2	3	11.87	4.8	1	29.39	0	4.4299	0.790745	2.81035	1.25711	108.648	5.252	0	0	0	0	0	0	0	158	11.53	342	0	0
1	35	120	80	110	70	115	75	169	63	78	22.06	73	177.71	71	95.59	40.94	38.6	172.69	317	1.1	0.76	4.84	3	0.31	187.8	2	15.98	4.4	1	38.37	0	4.59674	1.9491	2.64439	1.05898	102.232	5.30584	0	0	0	0	0	1	0	183	7.54	179	0	0
1	26	120	80	110	70	115	75	175	67	79	21.88	60	176.18	72	91.11	38.92	26.1	147.5	282	1.12	0.75	5.32	4	0.24	177.3	2	16.7	4.6	1	40.25	0	4.55717	1.66479	2.78738	1.00673	107.76	5.05717	0	1	0	0	0	1	0	170	5.57	184	0	0
1	30	120	80	110	70	115	75	174	72	87	23.78	59	141.25	69	97.64	26.82	17.1	390.75	420	0.97	0.55	3	2	0.37	442.6	4	21.83	5.5	3	33.63	0	3.65365	4.41027	0.938438	0.69374	36.28	5.41963	0	1	0	0	0	0	0	180	7.33	240	0	0
2	44	110	80	100	70	105	75	148	42	69	19.17	57	171.26	63	89.52	72.11	68	65.71	319	1.63	0.62	2.23	1	0.31	118.5	4	15.62	5.4	2	21.63	0	4.4299	0.741648	2.22473	1.86524	86.008	4.96892	0	0	0	0	0	0	0	159	7.29	257	0	0
2	26	120	80	110	70	115	75	160	64	74	25	58	118.45	75	84.2	56.5	67.7	61.91	251	1.19	0.44	1.28	1	0.32	7.9	1	10.87	6.7	3	13.17	0	3.06389	0.698758	1.28215	1.46146	49.568	4.67362	0	0	0	0	0	0	0	139	9.47	203	0	0
1	31	110	80	100	70	105	75	162	58	81	22.1	53	189.22	75	96.22	67.32	76	97.39	357	1.49	0.78	5.41	4	0.3	490.9	4	19.36	4.7	1	40.12	0	4.89446	1.09921	2.6493	1.74133	102.422	5.34081	0	0	0	0	0	1	0	168	7.81	272	0	0
1	39	110	70	100	60	105	65	171	53	80	18.13	67	173.27	81	97.22	55.18	25.1	87.2	378	1.43	0.73	1.72	1	0.22	113.3	1	23.21	5.5	3	34.11	0	4.48189	0.984199	2.60347	1.42732	100.65	5.39631	0	0	0	0	0	1	0	179	6.93	189	0	0
2	30	130	90	120	80	125	85	161	61	83	23.53	58	201.9	63	86.95	60.1	86.9	68.21	292	1.28	0.81	3.07	2	0.47	40.8	2	17.5	6.2	3	34.3	0	5.22245	0.769865	3.315	1.55458	128.158	4.82627	0	0	0	0	0	0	0	152	5.72	209	0	0
1	72	110	80	100	70	105	75	175	62	80	20.24	83	198.5	2	88.34	74.9	33.1	67.28	298	1.68	0.8	0.58	1	0.34	278.9	3	21.13	5.8	3	38.46	0	5.13451	0.759368	2.84904	1.9374	110.144	4.90342	0	0	0	0	0	0	1	169	6.79	223	0	0
2	62	130	80	120	70	125	75	149	49	92	22.07	73	215.35	52	88.13	57.33	35	65.89	278	1.34	0.92	3.98	2	0.42	184.5	4	17.07	7.4	4	37.52	0	5.57036	0.743679	3.74656	1.48293	144.842	4.89176	0	0	0	0	0	0	0	148	5.14	255	0	0
2	25	90	60	80	50	85	55	148	39	76	17.8	50	153.31	55	80.38	50.43	232.7	44.12	219	1.18	0.66	0.98	1	0.25	11.3	1	18.11	4.9	2	24.01	0	3.9656	0.497968	2.4329	1.30445	94.056	4.46159	0	0	0	0	0	0	0	130	5.19	265	0	0
1	29	120	80	110	70	115	75	170	53	74	18.34	58	179.72	70	87.74	47.92	40.2	63.95	329	1.16	0.79	2.94	2	0.25	139.5	2	18.46	5.9	3	30.8	0	4.64873	0.721783	3.07838	1.23952	119.01	4.87012	0	0	0	0	0	0	0	161	6.05	269	0	0
1	31	110	80	100	70	105	75	170	57	73	19.72	58	175.15	89	91.67	42.24	45	82.56	405	1.14	0.84	4.04	2	0.21	119.6	1	15.23	5.9	3	33.86	0	4.53052	0.931828	3.01081	1.0926	116.398	5.08825	0	0	0	0	0	1	0	175	7.34	270	0	0
2	27	110	80	100	70	105	75	161	49	70	18.9	58	162.74	57	81.22	79.17	74.4	39.49	259	1.38	0.58	0.94	1	0.32	13.7	2	14.21	7.4	4	19.06	0	4.20952	0.445711	1.95737	2.04785	75.672	4.50821	0	0	0	0	0	0	0	138	7.32	257	0	0
1	50	140	100	130	90	135	95	173	58	104	19.38	62	147.76	58	101.21	20.95	723.7	132.77	289	0.6	0.82	49.59	4	1.69	873.6	4	23.51	20.5	4	38.52	0	3.82204	1.49853	2.59327	0.541904	100.256	5.61778	0	1	0	1	0	0	0	155	4.27	175	0	0
2	48	130	90	120	80	125	85	155	69	98	28.72	49	232.19	68	93.96	40.11	186.8	88.4	353	1.11	1.12	4.79	3	1.09	438	4	17.25	6.7	3	50.93	0	6.00595	0.997743	4.51112	1.03751	174.4	5.21536	0	1	0	0	0	0	0	168	5.88	229	0	1
2	33	140	90	130	80	135	85	160	54	89	21.09	58	254.09	51	87.26	64.82	68	137.86	300	1.71	1.04	2.92	2	0.82	60.7	3	13.97	5.8	3	54.49	1	6.57243	1.55598	4.18257	1.67667	161.698	4.84347	0	1	0	0	0	0	0	142	4.57	250	1	1
1	39	120	80	110	70	115	75	165	56	69	20.57	58	146.86	68	86.01	70.07	49.5	38.38	286	1.54	0.5	5.56	4	1.59	86.8	1	18.03	17.8	4	13.08	0	3.79876	0.433183	1.78774	1.81247	69.114	4.77409	0	0	0	0	0	1	0	176	6.59	212	0	0
2	29	120	80	110	70	115	75	148	45	68	20.54	82	171.4	49	78.05	57.15	32.5	92.1	295	1.4	0.71	2.08	1	0.3	9.3	1	9.84	5.3	2	34.53	0	4.43352	1.0395	2.47879	1.47827	95.83	4.33226	0	0	0	0	0	0	0	119	8.33	252	0	0
2	49	130	90	120	80	125	85	148	52	97	23.74	63	218.46	48	98.85	64.01	159.6	68.67	240	1.68	0.96	2.75	1	0.22	69.1	3	10.7	5.5	3	43.86	0	5.6508	0.775056	3.63983	1.65572	140.716	5.48679	0	0	0	0	0	0	0	161	7.23	311	0	0
1	35	120	80	110	70	115	75	161	51	83	19.68	81	157.05	71	85.52	30.52	298.8	215.21	397	1.1	0.74	2.42	1	0.4	359.2	4	16.92	5.1	2	44.14	0	4.06234	2.42901	2.15954	0.789446	83.488	4.74689	1	1	0	1	0	1	0	170	6.56	297	0	0
1	48	120	80	110	70	115	75	167	67	85	24.02	63	127.87	85	90.52	42.33	291.9	74.13	388	1.06	0.56	3.11	2	0.5	246.1	3	15.55	6.9	4	17.47	0	3.30755	0.836682	1.82913	1.09493	70.714	5.02442	0	0	0	0	0	1	1	166	7.03	150	0	0
2	48	110	80	100	70	105	75	152	61	95	26.4	51	218.32	58	71.49	39.61	161.8	129.25	277	1.18	1.1	4.89	3	0.38	21.6	2	12.84	4.9	2	72.21	1	5.64718	1.4588	3.95396	1.02457	152.86	3.96814	0	1	0	0	0	0	0	163	7.58	294	0	0
1	38	100	70	90	60	95	65	178	58	88	18.31	57	157.81	64	81.84	40.94	67.7	71.08	273	1.05	0.72	3.74	2	0.29	142.7	2	12.46	4.6	1	30.8	0	4.082	0.802257	2.6553	1.05898	102.654	4.54263	0	0	0	0	0	1	0	154	6.68	312	0	0
2	63	140	90	130	80	135	85	165	60	99	22.04	67	179.02	72	84.17	34.84	624.2	186.59	251	1.13	0.85	3.41	2	0.6	125.3	4	0.53	4.8	1	50.12	0	4.63063	2.10598	2.76415	0.90119	106.862	4.67196	0	1	0	0	0	0	0	163	6.27	259	0	0
2	29	120	70	110	60	115	65	154	50	78	21.08	92	107.63	40	78.82	69.86	16.1	38.84	191	1.4	0.33	5.32	3	0.17	2	1	12.05	4.8	1	7.27	0	2.78401	0.438375	0.776048	1.80704	30.002	4.375	0	0	0	0	0	0	0	71	8.16	468	0	0
1	29	120	80	110	70	115	75	178	58	83	18.31	58	115.6	79	86.35	36.85	595.4	53.11	320	0.95	0.55	5.67	4	0.21	201.9	3	16.05	4.2	1	21.1	0	2.99017	0.599436	1.76223	0.953182	68.128	4.79296	0	1	0	0	0	0	0	149	5.4	249	0	0
1	31	100	70	90	60	95	65	183	68	86	20.31	56	125.65	92	90.42	49.36	456.1	60.52	415	1.25	0.56	5.33	4	0.01	128.4	1	20.76	4.5	1	18.62	0	3.25013	0.68307	1.66027	1.27677	64.186	5.01887	0	0	0	0	0	1	0	165	5.83	231	0	0
2	73	140	90	130	80	135	85	154	64	97	26.99	68	217.98	77	94.9	41.13	371.8	120.91	361	1.18	1.05	0.57	1	0.51	238.9	4	26.26	6.3	3	54.19	1	5.63839	1.36467	3.94899	1.06389	152.668	5.26754	1	0	0	1	0	0	0	152	4.62	156	0	0
2	46	130	95	120	85	125	90	150	44	81	19.56	74	231.15	47	79.31	55.23	320.3	144.81	279	1.53	0.94	0.35	1	0.21	57.2	3	13.43	8.3	4	54.8	1	5.97905	1.63442	3.80129	1.42861	146.958	4.4022	0	0	0	1	0	0	0	154	7.42	329	0	0
1	66	140	90	130	80	135	85	171	58	96	19.84	63	199.82	87	89.34	94.77	227	55.98	339	1.75	0.68	5	3	0.39	33.9	1	16.74	4.8	2	25.49	0	5.16865	0.631828	2.42768	2.45137	93.854	4.95893	0	0	0	0	0	0	0	178	5.26	215	0	0
1	44	130	90	120	80	125	85	166	59	80	21.41	58	159.41	74	88.13	56.58	108.4	53.11	337	1.17	0.67	4.88	3	0.19	152.3	2	17.28	4.8	2	20.53	0	4.12338	0.599436	2.3851	1.46353	92.208	4.89176	0	0	0	0	0	1	0	173	7.68	191	0	0
1	46	130	90	120	80	125	85	168	56	81	19.84	58	138.62	79	93.09	44.9	78.3	64.41	286	1.15	0.63	2.98	2	0.25	180.1	2	20.66	5.8	3	23.88	0	3.58562	0.726975	2.091	1.16141	80.838	5.16707	0	0	0	0	0	1	0	184	8.01	178	0	0
1	34	140	100	130	90	135	95	174	62	77	20.48	54	116.43	99	88.54	38.56	20.6	131.94	322	1.12	0.48	1.72	1	0.27	120.1	1	19.23	17.7	4	22.61	0	3.01164	1.48916	1.33166	0.997413	51.482	4.91452	0	1	0	1	0	0	0	185	10.28	766	0	0
1	28	130	90	120	80	125	85	165	54	72	19.83	58	119.28	79	97.74	33.88	28.9	67.56	508	0.93	0.58	0.73	1	0.33	174.6	2	21.59	5.5	3	23.64	0	3.08536	0.762528	1.85949	0.876358	71.888	5.42518	0	1	0	0	0	1	0	154	8.22	218	0	0
2	23	120	80	110	70	115	75	158	49	71	19.63	58	161.49	65	74.13	74.29	516.8	53.1	389	1.65	0.59	3.02	2	0.19	14.2	2	11.45	5.1	2	19.38	0	4.17719	0.599323	1.98086	1.92162	76.58	4.11468	0	0	0	0	0	0	0	156	7.88	292	0	0
1	31	120	60	110	60	115	60	165	57	81	20.94	58	210.98	78	86.15	82.28	144.5	60.7	475	1.58	0.8	5.63	4	0.15	366.1	4	17.82	6	3	34.2	0	5.45732	0.685102	3.015	2.1283	116.56	4.78186	0	0	0	0	0	1	0	173	6.88	163	0	0
2	29	110	70	90	60	100	65	157	56	99	22.72	58	261.51	52	68.13	81.42	264.6	178.72	218	2.2	1.15	17.83	4	1.12	6.9	1	9.53	10.2	4	63.67	1	6.76436	2.01716	3.73373	2.10605	144.346	3.78164	0	1	0	0	0	0	0	132	13.8	318	1	0
1	34	120	90	130	80	125	85	165	59	80	21.67	58	217.43	71	95.17	44.85	36.6	94.51	412	1.17	0.93	3.61	2	0.36	205.9	3	19.16	5.1	2	52.17	0	5.62416	1.0667	3.97512	1.16011	153.678	5.28253	0	0	0	0	0	0	0	166	5.35	223	0	0
2	40	130	90	120	80	125	85	149	48	75	21.62	69	157.05	60	89.58	85.29	28.3	68.76	294	1.78	0.47	4.46	2	0.32	22.6	2	17.32	6.5	3	13.68	0	4.06234	0.776072	1.50047	2.20616	58.008	4.97225	0	0	0	0	0	0	0	158	5.9	237	0	0
2	31	120	70	110	60	115	65	155	56	73	23.31	65	176.11	54	85.63	76.4	160.5	69.13	198	1.72	0.6	4.16	2	0.37	17.2	2	13.6	8.4	4	20.71	0	4.55535	0.780248	2.22152	1.9762	85.884	4.753	0	0	0	0	0	0	0	146	6.36	284	0	0
1	28	130	80	120	70	125	75	157	61	81	24.75	57	194.83	82	85.24	43.82	93.3	97.02	367	1.2	0.91	4.08	2	0.2	289.6	3	15.98	5.3	3	41.54	0	5.03958	1.09503	3.40419	1.13347	131.606	4.73135	0	0	0	0	0	1	0	187	9.77	284	0	0
1	51	140	80	130	70	135	75	174	63	95	20.81	42	187.48	71	88.09	67.07	113.5	38.47	253	1.55	0.78	5.68	4	0.31	84.2	1	23.34	4.8	2	28.26	0	4.84946	0.434199	2.91557	1.73487	112.716	4.88954	0	0	0	0	0	1	0	170	7.53	238	0	0
2	49	160	100	140	90	150	95	153	48	74	20.5	58	144.02	59	83.12	69.22	59.4	64.69	275	1.63	0.52	10.77	4	0.32	112.8	3	13.1	18	4	17.33	0	3.7253	0.730135	1.60016	1.79048	61.862	4.61368	1	0	0	1	0	0	0	157	11.23	324	0	0
2	43	110	70	100	60	105	65	150	48	78	21.33	71	213.75	55	79.31	75.21	130.9	56.53	279	1.66	0.82	1.18	1	0.35	15.2	2	15.84	5.7	3	38.52	0	5.52897	0.638036	3.2911	1.94542	127.234	4.4022	0	0	0	0	0	0	0	123	7.38	295	0	0
1	44	110	80	100	70	105	75	172	76	110	25.69	58	162.53	68	98.85	33.5	87.3	129.99	426	0.98	0.82	3.07	2	0.2	80.2	1	23.57	5.6	3	47.47	0	4.20409	1.46716	2.66508	0.866529	103.032	5.48679	0	1	0	0	0	0	0	170	6.5	269	0	0
1	60	130	90	120	80	125	85	160	50	81	19.53	58	196.63	57	82.95	49.13	730.5	97.66	336	1.28	0.87	3.94	2	1.01	143.8	2	26.29	5.6	3	40.25	0	5.08614	1.10226	3.31009	1.27082	127.968	4.60424	0	0	0	0	0	1	0	174	5.77	295	0	0
2	58	140	100	130	95	135	97.5	153	54	89	23.07	58	168.77	78	81.81	42.05	67.7	115.73	351	1.14	0.8	2.7	1	0.26	190.6	4	21.09	4.9	2	42.62	0	4.36549	1.30621	2.6791	1.08769	103.574	4.54096	0	0	0	1	0	0	0	164	6.93	230	0	0
2	27	130	90	120	80	125	85	154	46	69	19.4	58	180.34	89	92.33	48.07	275.2	86.55	259	1.26	0.84	5.63	4	0.42	4.4	1	21.06	4.4	1	48.66	0	4.66477	0.976862	2.97362	1.2434	114.96	5.12489	0	0	0	0	0	0	0	111	11.61	372	0	0
2	34	120	80	110	70	115	75	159	45	77	17.8	58	205.57	50	89.03	46.98	159.9	161.58	262	1.36	0.88	0.51	1	0.22	5.9	1	13.63	7.9	4	51.11	0	5.31738	1.8237	3.26627	1.21521	126.274	4.94172	0	0	0	0	0	0	0	116	4.29	347	0	0
1	29	120	90	110	80	115	85	180	68	71	20.99	58	155.81	88	75.94	40.52	80.8	112.48	289	1.09	0.73	5.21	3	0.48	114.9	1	30.15	4.4	1	41.96	0	4.03026	1.26953	2.40026	1.04811	92.794	4.21514	0	0	0	0	0	0	0	165	4.79	232	0	0
2	41	150	100	140	90	145	95	152	44	76	19.04	58	186.1	73	78.61	67.84	42.4	62.92	288	1.54	0.71	4.83	3	0.47	21.1	2	27.82	4.9	2	30.48	0	4.81376	0.710158	2.73347	1.75479	105.676	4.36334	0	0	0	1	0	0	0	156	7.99	242	0	0
2	58	130	90	120	80	125	85	156	65	88	26.71	58	175.98	61	103.27	54.37	481.3	94.05	184	1.32	0.74	2.44	1	0.36	197.9	4	15.05	7.4	4	39.89	0	4.55199	1.06151	2.65908	1.40636	102.8	5.73213	0	0	0	0	0	0	0	158	6.42	278	0	0
2	27	110	80	100	70	105	75	149	48	70	21.62	58	98.28	67	78.96	33.47	38.6	76.73	272	0.96	0.45	2.56	1	0.26	72.7	3	15.3	6.8	3	17.81	0	2.54216	0.866027	1.27946	0.865753	49.464	4.38277	0	1	0	0	0	0	0	137	6.66	118	0	0
1	41	130	80	120	70	125	75	162	60	85	22.86	58	250.21	97	87.81	43.56	134.4	270.7	369	1.23	1.15	4.22	2	0.24	201.9	3	18.91	4.9	2	90.41	1	6.47206	3.0553	3.9449	1.12675	152.51	4.874	0	1	0	0	0	1	0	166	8.66	248	1	0
2	44	120	80	110	70	115	75	152	47	83	20.34	58	154.77	56	83.54	58.45	14.5	49.68	277	1.3	0.63	2.79	1	0.21	21.6	2	12.08	5	2	19.39	0	4.00336	0.560722	2.23445	1.5119	86.384	4.63699	0	0	0	0	0	0	0	168	8.18	150	0	0
1	46	140	100	130	90	135	95	167	58	68	20.8	58	193.93	63	81.08	72.93	304	54.68	325	1.49	0.75	2.87	2	0.29	92.3	1	30.08	5.2	2	24.4	0	5.0163	0.617156	2.84697	1.88645	110.064	4.50044	0	0	0	1	0	1	0	173	7.78	273	0	0
1	52	160	110	140	100	150	105	151	65	95	28.51	86	217.42	55	121.29	63.45	51.4	92.29	345	1.45	0.92	4.1	2	0.24	310	4	24.03	4.8	2	57.88	1	5.6239	1.04165	3.50523	1.64123	135.512	6.73235	1	0	0	1	0	1	0	175	5.5	218	0	0
1	42	140	90	130	80	135	85	163	68	92	25.59	58	174.18	77	86.84	37.29	41.4	173.72	314	1.07	0.82	3.82	2	0.41	73.7	1	15.44	5.5	3	56.94	1	4.50543	1.96072	2.64216	0.964563	102.146	4.82016	0	1	0	0	0	1	0	174	8.98	228	0	0
1	68	120	80	110	60	115	70	164	49	87	18.22	58	191.85	90	85.14	45.46	144.8	79.14	353	1.16	0.87	19	4	0.15	197.4	2	22.35	46.8	4	36.31	0	4.96249	0.893228	3.37719	1.17589	130.562	4.7258	1	0	0	1	0	1	0	165	8.58	240	0	0
1	43	140	90	130	80	135	85	170	58	74	20.07	58	234.06	93	80.11	74.1	99.7	79.23	409	1.56	0.95	4.38	3	1.74	427.4	4	24.55	4.8	2	48.08	0	6.05432	0.894244	3.72773	1.91671	144.114	4.4466	0	0	0	0	0	0	0	155	5.85	244	0	0
2	43	120	80	110	70	115	75	156	53	83	21.78	78	216.04	53	96.18	66.93	19	87.29	299	1.56	0.87	4.37	2	1.28	236.6	4	12.08	5.8	3	39.32	0	5.5882	0.985214	3.40538	1.73125	131.652	5.33859	0	0	0	0	0	0	0	175	7.53	300	0	0
2	46	130	90	120	80	125	85	154	50	73	21.08	64	219.37	85	88.96	74.79	114.7	81.83	284	1.76	0.85	5.25	3	0.24	136.3	4	23.96	8	4	35.32	0	5.67434	0.923589	3.31645	1.93456	128.214	4.93783	0	0	0	0	0	0	0	183	9.2	209	0	0
2	22	110	70	100	60	105	65	158	43	68	17.22	63	150.61	48	82.19	59.94	34.7	46.72	249	1.19	0.59	5.66	4	0.45	34.9	2	11.45	4.4	1	23.71	0	3.89576	0.527314	2.10362	1.55044	81.326	4.56206	0	0	0	0	0	0	0	153	5.83	197	0	0
1	28	160	100	150	95	155	97.5	166	66	83	23.95	65	272.95	91	77.15	49.46	187.7	144.07	363	1.29	1.26	4.37	3	0.3	125.8	1	20.52	6.8	4	78.66	1	7.06027	1.62607	5.03559	1.27936	194.676	4.2823	1	1	0	1	0	1	0	180	7.51	332	1	1
1	41	130	80	120	70	125	75	161	51	78	19.68	57	113.25	65	80.87	45.28	306.5	33.93	329	1.03	0.49	4.61	3	0.17	174.6	2	17.96	4.2	1	14.91	0	2.92938	0.382957	1.58262	1.17124	61.184	4.48879	0	0	0	0	0	0	0	162	7.62	224	0	0
2	34	140	90	130	80	135	85	154	48	77	20.24	80	239.26	50	87.99	63.39	148.3	66.08	211	1.34	0.99	0.44	1	0.54	16.2	2	17.28	15.1	4	47.13	0	6.18883	0.745824	4.20729	1.63968	162.654	4.88399	0	1	0	0	0	0	0	155	4.76	229	0	1
2	62	170	120	160	110	165	115	156	93	116	38.21	95	139.93	63	105.9	41.98	87.6	90.9	397	1.13	0.57	10.49	4	0.42	242.5	4	16.45	7.3	4	22.06	0	3.6195	1.02596	2.06337	1.08588	79.77	5.87811	0	0	0	1	0	0	0	145	10.08	285	0	0
1	68	140	90	130	80	135	85	157	55	81	22.31	58	182.98	67	98.79	45.98	100.4	64.6	315	1.17	0.86	2.04	1	0.38	371.7	4	17.32	4.9	2	37.42	0	4.73306	0.72912	3.20952	1.18934	124.08	5.48346	0	0	0	0	0	1	0	177	8.18	188	0	0
1	51	140	90	130	80	135	85	175	78	94	25.47	58	206.06	85	96.63	42.03	20.9	214.84	458	1.19	0.96	2.48	1	0.42	171.3	2	22.35	6.6	4	63.41	1	5.33006	2.42483	3.13145	1.08717	121.062	5.36357	0	1	0	0	0	1	0	161	6.56	221	0	0
2	50	130	80	120	70	125	75	160	65	91	25.39	58	156.85	56	96.04	50.2	111.5	146.21	249	1.34	0.67	4.6	3	0.46	11.3	1	13.4	5.3	2	35.34	0	4.05717	1.65023	2.00228	1.2985	77.408	5.33082	0	0	0	0	0	0	0	194	7.54	175	0	0
1	60	140	90	130	80	135	85	162	58	90	22.1	73	247.86	60	82.92	63.09	851.1	62.65	328	1.53	1.09	1.24	1	5.42	278.9	3	20.05	4.8	2	59.29	1	6.41128	0.707111	4.45525	1.63192	172.24	4.60258	0	1	0	0	0	1	0	133	6.06	243	1	1
2	64	140	100	130	90	135	95	154	58	95	24.46	58	153.66	61	88.72	45.6	83.7	53.67	286	1.15	0.68	1	1	0.45	189	4	16.85	8	4	22.4	0	3.97465	0.605756	2.51749	1.17951	97.326	4.92451	0	0	0	1	0	0	0	176	6.29	258	0	0
2	60	140	90	130	80	135	85	155	61	94	25.39	58	214.93	60	97.6	44.79	86.9	94.33	294	1.23	1	3.51	2	0.25	83.7	3	15.34	4.8	1	55.3	1	5.55949	1.06467	3.91293	1.15856	151.274	5.41741	1	0	0	1	0	0	0	159	6.07	177	0	0
2	35	110	80	100	70	105	75	158	38	85	15.22	48	140.49	56	74.97	53.96	527.1	53.2	269	1.16	0.6	3.25	2	0.48	75.7	3	16.23	8.2	4	20.85	0	3.63399	0.600451	1.96301	1.39576	75.89	4.1613	0	0	0	0	0	0	0	146	7.59	259	0	0
1	41	120	80	110	70	115	75	146	52	85	24.39	66	163.09	68	86.88	49.33	107.7	97.67	338	1.23	0.71	4.01	2	0.29	180.1	2	12.27	5	2	30.85	0	4.21857	1.10237	2.4373	1.276	94.226	4.82238	0	0	0	0	0	1	0	148	4.83	316	0	0
2	38	120	80	110	70	115	75	155	48	82	19.98	59	178.27	47	76.39	68.49	101.3	104.98	313	1.59	0.67	4.58	3	0.32	2	1	14.66	6	3	30.23	0	4.61123	1.18488	2.29653	1.7716	88.784	4.24012	0	0	0	0	0	0	0	173	10.19	254	0	0
2	30	140	90	130	80	135	85	164	56	75	20.82	60	169.12	62	80.17	71.81	108.7	46.07	294	1.48	0.64	3.37	2	0.26	3.4	1	11.81	7.9	4	20.85	0	4.37455	0.519977	2.27874	1.85748	88.096	4.44993	0	0	0	0	0	0	0	125	7.1	340	0	0
1	37	130	90	120	80	125	85	169	59	85	20.66	58	143.33	72	81.95	58.24	82.8	57.93	370	1.4	0.6	3.49	2	0.19	132.7	1	20.66	4.9	2	19.59	0	3.70745	0.653837	1.90129	1.50647	73.504	4.54873	0	0	0	0	0	1	0	141	6.92	308	0	0
1	38	130	80	120	75	125	77.5	174	68	89	22.46	72	117.96	82	90.35	35.37	235.8	89.98	342	0.94	0.57	4.02	2	0.31	196.2	2	28.26	5.4	3	27.39	0	3.05122	1.01558	1.67082	0.914899	64.594	5.01499	0	1	0	0	0	0	0	158	7.42	311	0	0
1	20	100	70	90	60	95	65	170	53	69	18.34	58	167.8	83	89.06	43.24	563.9	101.83	438	1.08	0.8	5.13	3	0.33	171.3	2	22.65	5.7	3	44.37	0	4.3404	1.14932	2.69514	1.11847	104.194	4.94338	0	0	0	0	0	1	0	171	7.04	136	0	0
2	37	120	80	110	70	115	75	166	49	75	17.78	80	155.18	55	79.24	58.93	76.4	92.01	191	1.39	0.64	4.96	3	0.25	118.5	4	12.97	5.2	2	24.51	0	4.01397	1.03849	2.01366	1.52431	77.848	4.39831	0	0	0	0	0	0	0	172	5.7	258	0	0
1	29	120	70	110	60	115	65	177	68	79	21.71	80	162.46	85	86.18	31.12	484.7	131.57	389	0.89	0.83	4.26	2	2.32	339.6	4	16.27	4.8	2	47.81	0	4.20228	1.48499	2.71666	0.804966	105.026	4.78353	0	1	0	0	0	1	0	156	5.3	278	0	0
2	23	100	60	90	50	95	55	152	42	62	18.18	58	167.11	60	86.7	58.47	22.5	66.17	251	1.3	0.69	5.56	4	0.33	6.9	1	16.96	4.8	1	28.18	0	4.32256	0.74684	2.46782	1.51242	95.406	4.81239	0	0	0	0	0	0	0	172	8.37	195	0	0
1	28	120	80	100	60	110	70	166	54	75	19.6	58	189.56	82	72.26	47.16	55.9	99.71	361	1.13	0.81	5.51	4	0.84	160.9	2	22.75	5.6	3	38.24	0	4.90326	1.1254	3.16756	1.21987	122.458	4.01088	0	0	0	0	0	0	0	126	8.01	460	0	0
1	33	110	80	100	70	105	75	172	63	77	21.3	58	177.5	70	76.53	55.25	189.9	95.35	345	1.23	0.75	0.72	1	0.31	176.8	2	21.69	6.7	4	30.98	0	4.59131	1.07619	2.66891	1.42913	103.18	4.24789	0	0	0	0	0	1	0	183	7.26	204	0	0
1	39	120	80	110	70	115	75	161	74	97	28.55	58	211.95	84	91.98	54.32	89.5	160.28	349	1.19	0.89	3.63	2	0.41	379.4	4	18.53	4.9	2	50.09	0	5.48241	1.80903	3.24816	1.40507	125.574	5.10546	1	0	0	1	0	0	0	163	5.48	229	0	0
1	44	100	70	90	60	95	65	156	58	86	23.83	58	163.64	95	97.36	29.13	82.5	145.37	287	0.89	0.82	14.18	4	0.39	270.3	3	19.26	6.2	3	49.65	0	4.2328	1.64074	2.72726	0.753492	105.436	5.40409	1	1	0	1	0	1	0	174	5.46	278	0	0
2	38	130	90	120	80	125	85	157	49	74	19.88	58	154.21	57	95.63	58.85	18.4	68.21	288	1.3	0.64	5.36	3	3.79	20.6	2	11.25	6.2	3	21.58	0	3.98888	0.769865	2.11376	1.52225	81.718	5.30806	1	0	0	1	0	0	0	158	7.74	181	0	0
2	60	120	80	110	70	115	75	154	43	77	18.13	58	184.57	59	82.22	59.44	102.3	67.1	220	1.26	0.79	4.37	2	0.54	175.1	4	18.03	7.9	4	28.72	0	4.77419	0.757336	2.88955	1.53751	111.71	4.56372	0	0	0	0	0	0	0	157	5.59	233	0	0
2	27	100	70	90	60	95	65	153	51	79	21.79	58	159.55	51	76.15	50.6	17.7	55.89	189	1.12	0.68	1.67	1	0.39	28.5	2	10.32	7.6	4	25.76	0	4.127	0.630813	2.52902	1.30885	97.772	4.2268	0	0	0	0	0	0	0	150	5.2	271	0	0
2	25	100	70	90	60	95	65	140	34	64	17.35	58	163.99	62	79.2	59.55	391.4	77.75	237	1.3	0.68	5.6	4	0.27	15.7	2	15.44	4.8	1	29.98	0	4.24185	0.87754	2.29928	1.54035	88.89	4.39609	0	0	0	0	0	0	0	163	9.24	227	0	0
2	59	120	80	110	70	115	75	148	58	93	26.48	58	192.82	62	90.73	54.89	762.1	66.08	330	1.21	0.85	4.35	2	0.47	106.1	3	22.12	7.9	4	35.43	0	4.98758	0.745824	3.22592	1.41981	124.714	5.03608	0	0	0	0	0	0	0	142	7.03	217	0	0
2	50	150	90	140	80	145	85	139	39	75	20.19	58	179.44	62	85.87	46.06	119.2	76.73	343	1.17	0.82	0.86	1	0.4	105.1	3	16.45	11.4	4	39.56	0	4.64149	0.866027	3.05313	1.19141	118.034	4.76632	0	0	0	1	0	0	0	146	5.85	227	0	0
1	39	110	80	100	70	105	75	166	58	78	21.05	58	146.38	74	82.95	41.03	393.2	70.25	340	1.03	0.71	0.8	1	0.24	114.4	1	21.09	8.7	4	27.4	0	3.78634	0.792889	2.36161	1.0613	91.3	4.60424	0	0	0	0	0	1	0	152	9.61	367	0	0
1	31	120	80	110	70	115	75	179	87	105	27.15	58	190.67	88	80.97	26.76	95.6	284.41	438	0.94	0.87	8.43	4	0.71	186.2	2	23.74	9.2	4	59.64	1	4.93197	3.21005	2.76844	0.692188	107.028	4.49434	0	1	0	0	0	1	0	149	4.99	207	0	0
2	28	110	80	100	70	105	75	156	49	69	20.13	58	144.72	58	88.16	52.82	394.5	81.83	314	1.26	0.63	4.53	2	0.29	9.8	1	16.78	4.8	1	28.79	0	3.7434	0.923589	1.9538	1.36627	75.534	4.89343	0	0	0	0	0	0	0	175	10.05	282	0	0
1	33	120	80	110	70	115	75	175	67	85	21.88	58	182.01	78	90.97	57.16	75.4	41.44	336	1.31	0.81	5.63	4	0.56	40.3	1	21.53	5	2	32.37	0	4.70797	0.46772	3.01505	1.47853	116.562	5.0494	0	0	0	0	0	0	0	157	9.08	325	0	0
2	28	110	80	90	60	100	70	155	44	73	18.31	62	166.07	63	78.72	45.29	52.3	72.12	250	1.14	0.69	5.13	3	0.36	37.4	2	14.35	4.3	1	23.74	0	4.29565	0.813995	2.75106	1.1715	106.356	4.36945	0	0	0	0	0	0	0	147	6.61	230	0	0
1	32	120	80	110	70	115	75	170	71	95	24.57	55	223.87	64	87.5	45.98	78.3	400.04	573	1.5	0.92	9.76	4	0.39	326.3	4	16.81	8.9	4	68.59	1	5.79074	4.51512	2.53187	1.18934	97.882	4.85679	1	1	0	1	0	1	1	170	8.13	237	0	0
1	28	130	90	120	80	125	85	173	88	100	29.4	69	166.21	61	116.49	23.36	94	842.08	395	0.92	0.21	0.14	1	0.41	308	4	15.09	5.9	3	17.79	0	4.29928	9.50429	-0.661304	0.604242	-25.566	6.46592	0	1	0	0	0	1	0	161	9.39	304	0	0
2	18	120	80	110	70	115	75	159	58	71	22.94	58	176.12	66	92.67	59.24	459.8	51.84	353	1.37	0.76	0.11	1	0.26	73.7	3	12.68	6.2	3	28.83	0	4.55561	0.585102	2.7551	1.53233	106.512	5.14376	0	0	0	0	0	0	0	152	8.05	353	0	0
1	19	120	80	110	70	115	75	166	50	63	18.14	71	109.58	78	90.94	35.74	27	100	408	0.94	0.46	5.62	4	0.47	140	2	14.98	4.3	1	18.39	0	2.83445	1.12867	1.39265	0.92447	53.84	5.04774	0	1	0	0	0	0	0	187	8.28	275	0	0
2	31	100	70	90	60	95	65	151	41	64	17.98	57	146.31	53	81.6	49.42	102.9	45.35	216	1.14	0.62	0.41	1	0.33	43.8	3	11.42	6.4	3	20.24	0	3.78453	0.511851	2.2716	1.27832	87.82	4.52931	0	0	0	0	0	0	0	147	8.76	354	0	0
1	29	120	70	110	65	115	67.5	175	53	72	17.31	50	122.4	101	78.23	42.87	113.1	54.43	476	1.03	0.57	3.03	2	0.24	189	2	20.56	4.8	2	20.37	0	3.16606	0.614334	1.77558	1.1089	68.644	4.34225	0	0	0	0	0	0	0	173	6.52	218	0	0
2	44	140	100	130	90	135	95	154	48	85	20.24	72	162.67	67	89.17	42.32	898.5	68.79	240	1.05	0.73	1.43	1	0.41	41.3	2	13.77	11.2	4	28.46	0	4.20771	0.776411	2.75717	1.09467	106.592	4.94949	0	0	0	1	0	0	0	148	8.45	295	0	0
2	19	110	80	100	60	105	70	155	41	69	17.07	57	148.19	54	78.89	51.61	36	81.38	269	1.2	0.59	5.6	4	0.15	12.8	2	16.67	4.7	1	20.35	0	3.83316	0.91851	2.07719	1.33497	80.304	4.37889	0	0	0	0	0	0	0	141	8.14	276	0	0
1	32	120	80	110	70	115	75	173	72	85	24.06	58	222.91	104	69.83	43.58	782.6	150.67	364	1.21	0.94	4.79	3	0.33	79.7	1	23.47	6	3	58.57	1	5.76591	1.70056	3.85918	1.12726	149.196	3.876	0	0	0	0	0	0	0	110	6.67	385	0	0
1	19	120	80	110	70	115	75	162	62	81	23.62	58	115.26	77	97.22	26.99	291.9	89.44	388	0.78	0.57	5.5	4	0.24	102.5	1	41.67	4.6	1	24.54	0	2.98138	1.00948	1.82054	0.698138	70.382	5.39631	0	1	0	0	0	0	0	172	8.19	191	0	0
2	20	120	70	110	60	115	65	162	46	68	17.53	66	137.31	62	78.75	48.75	32.8	79.72	314	1.25	0.54	5.03	3	0.04	31.4	2	19.19	5.3	2	19.53	0	3.55173	0.899774	1.87832	1.26099	72.616	4.37111	0	0	0	0	0	0	0	167	4.92	76	0	0
2	50	130	90	120	80	125	85	158	60	79	24.03	64	268.86	100	136.74	71.02	23.5	177.26	431	2.24	1.12	3.41	2	0.37	12.8	2	22.62	6.2	3	68.88	1	6.95447	2.00068	4.20041	1.83704	162.388	7.58992	0	1	0	0	1	0	0	174	7.21	230	1	1
1	29	128	87	125	85	126.5	86	175	62	88	20.24	81	176.33	68	85.77	34.09	41.8	107.42	251	0.96	0.84	4.3	3	0.15	117.5	1	17.14	4.9	2	38.34	0	4.56105	1.21242	3.12354	0.88179	120.756	4.76077	0	1	0	0	0	0	0	170	6.78	175	0	0
2	35	120	80	110	70	115	75	160	71	90	27.73	64	157.89	54	94.17	45.17	35.7	119.74	259	1.23	0.66	4.21	2	0.6	87.8	3	13.84	6	3	30.3	0	4.08407	1.35147	2.29622	1.16839	88.772	5.22702	0	0	0	0	0	0	0	167	8.52	272	0	0
2	26	130	90	120	80	125	85	157	43	65	17.44	69	150.13	56	80.63	74.34	698.8	34.7	305	1.33	0.51	10.8	4	0.32	5.9	1	14.21	10.5	4	16.58	0	3.88334	0.391648	1.78091	1.92292	68.85	4.47547	0	0	0	0	0	0	0	131	5.43	292	0	0
2	27	120	80	110	70	115	75	160	51	74	19.92	57	152.07	67	77.05	70.7	41.4	45.35	241	1.51	0.53	4.96	3	1.04	16.7	2	14.95	5.2	2	18.56	0	3.93352	0.511851	1.87015	1.82876	72.3	4.27675	0	0	0	0	0	0	0	155	5.14	155	0	0
1	35	130	80	120	70	125	75	160	57	74	22.27	58	168.57	90	85.21	49.83	73.8	69.81	439	1.21	0.78	4.46	3	0.22	223.7	3	21.69	5.7	3	33.8	0	4.36032	0.787923	2.71024	1.28893	104.778	4.72968	0	0	0	0	0	0	0	173	4.89	167	0	0
1	35	140	100	130	90	135	95	178	88	93	27.77	59	158.38	98	104.72	53.38	69	63.23	432	1.25	0.66	2.04	1	0.22	289.6	3	19.43	5.5	3	21.71	0	4.09674	0.713657	2.38888	1.38076	92.354	5.81261	0	0	0	1	0	1	0	174	6.17	223	0	0
1	20	100	70	90	60	95	65	170	51	68	17.65	59	140.98	74	107.74	45.29	28.6	53.69	298	1.05	0.64	4.92	3	0.2	215	3	11.51	5.2	2	21.19	0	3.64666	0.605982	2.19741	1.1715	84.952	5.98024	0	0	0	0	0	1	0	167	4.63	235	0	0
1	48	160	110	140	100	150	105	171	61	77	20.86	67	152.97	78	89	58.81	58.7	51.93	212	1.3	0.62	4.96	3	0.37	126.4	1	56.8	4.4	1	18.82	0	3.9568	0.586117	2.16694	1.52121	83.774	4.94005	1	0	0	1	0	1	0	175	5.51	203	0	0
2	25	140	90	130	70	135	80	165	58	80	21.3	60	180.69	61	77.68	51.14	38.6	51.37	258	1.11	0.77	9.54	4	0.36	53.2	3	14.39	7.9	4	28.97	0	4.67382	0.579797	3.08526	1.32281	119.276	4.31172	0	0	0	0	0	0	0	223	3.34	97	0	0
1	28	120	80	110	70	115	75	163	51	81	19.2	80	96.76	81	85.24	40.19	230.1	49.71	328	1.04	0.43	4.29	3	0.29	255.1	3	26.16	4.9	2	12.25	0	2.50285	0.561061	1.2061	1.03958	46.628	4.73135	0	0	0	0	0	0	0	164	10	244	0	0
2	32	120	80	110	70	115	75	156	55	89	22.6	59	127.33	71	108.48	48.62	195.7	62.4	433	1.31	0.57	4.22	2	0.26	8.3	1	17.96	4.8	1	23.47	0	3.29359	0.704289	1.71314	1.25763	66.23	6.02131	0	0	0	0	0	0	0	106	5.04	295	0	0
1	40	110	80	100	70	105	75	165	54	79	19.83	60	154.36	75	79.86	35.9	34.4	101.03	421	1.02	0.7	0.54	1	0.54	200.7	3	28.33	6.3	4	35.52	0	3.99276	1.14029	2.54149	0.928608	98.254	4.43273	0	1	0	0	0	1	0	169	7.82	352	0	0
1	56	110	80	100	70	105	75	169	58	83	20.31	58	183.19	79	84.13	59.48	154.6	56.65	295	1.37	0.81	0.58	1	0.35	259.9	3	20.79	5.8	3	28.62	0	4.73849	0.639391	2.90688	1.53854	112.38	4.66974	0	0	0	0	0	1	0	167	5.67	154	0	0
1	28	140	90	130	80	135	85	161	60	82	23.15	58	207.94	55	111.84	120.42	11	55.91	325	2.2	0.57	4.95	3	0.35	109.7	1	19.67	4.8	2	25.11	0	5.37869	0.631038	1.9746	3.11485	76.338	6.20782	0	0	0	0	0	0	0	154	6.13	192	0	0
1	31	120	80	110	70	115	75	169	56	71	19.61	60	147.71	56	85.77	64.31	97.2	83.52	275	1.68	0.63	1.97	1	0.24	215	3	15.55	6.4	4	17.63	0	3.82074	0.942664	1.72519	1.66348	66.696	4.76077	0	0	0	0	0	1	1	168	5.06	176	0	0
2	25	120	80	110	70	115	75	150	55	81	24.44	60	222.08	49	81.88	51.89	77.6	81.2	370	1.24	0.9	2.68	1	0.76	78.7	3	9.53	6.3	3	43.27	0	5.74444	0.916479	3.98215	1.34221	153.95	4.54485	0	0	0	0	0	0	0	147	5.87	184	0	0
1	19	100	70	90	60	95	65	182	71	79	21.43	59	148.95	72	92.85	38.58	50.4	53.88	365	0.9	0.69	5.6	4	0.2	65.6	1	16.42	4.2	1	29.16	0	3.85282	0.608126	2.57615	0.997931	99.594	5.15375	0	1	0	0	0	0	0	153	3.95	240	0	0
2	47	130	90	120	80	125	85	149	49	74	22.07	60	171.34	66	101.25	67.1	445.2	42.11	218	1.36	0.69	3.78	2	0.13	18.7	2	12.62	5.1	2	23.59	0	4.43197	0.475282	2.47848	1.73564	95.818	5.62	0	0	0	0	0	0	0	142	5.51	302	0	0
1	37	120	80	110	70	115	75	163	57	79	21.45	60	189.99	77	92.47	80.51	125.9	62.68	382	1.83	0.68	3.58	2	0.09	126.9	1	18.28	4.8	2	28.86	0	4.91438	0.707449	2.5076	2.08251	96.944	5.13266	0	0	0	0	0	1	0	167	10.34	298	0	0
1	27	110	70	100	60	105	65	166	58	78	21.05	59	140.15	84	105.91	57.03	137.9	80.55	369	1.32	0.57	5.16	3	0.18	108.7	1	12.84	4.6	1	22.67	0	3.62519	0.909142	1.73332	1.47517	67.01	5.87866	0	0	0	0	0	1	0	180	6.32	209	0	0
1	47	140	110	130	95	135	102.5	170	63	79	21.8	58	157.41	75	105.91	36.72	313.4	177.63	245	1.06	0.66	4.53	3	0.7	174.6	2	26.72	4.7	1	39.3	0	4.07165	2.00485	2.2029	0.949819	85.164	5.87866	0	1	0	1	0	1	0	181	8.59	229	0	0
1	25	110	80	100	70	105	75	173	63	78	21.05	60	194.91	80	84.55	37.29	288.4	196.35	385	1.16	0.89	4.93	3	0.33	187.8	2	53.55	7.5	4	59.66	1	5.04165	2.21614	3.0613	0.964563	118.35	4.69305	0	1	0	0	0	1	0	162	7.41	210	0	0
2	37	133	71	110	60	121.5	65.5	165	50	85	18.37	62	115.2	48	85.63	54.21	387.9	40.63	249	1.17	0.45	3.53	2	0.75	19.1	2	9.33	4.5	1	11.4	0	2.97982	0.458578	1.36741	1.40222	52.864	4.753	0	0	0	0	0	0	0	164	9.81	230	0	0
1	27	100	70	90	60	95	65	166	60	82	21.77	54	131.48	95	78.96	39.33	14.5	101.03	271	1.01	0.58	5.28	3	0.18	135.3	2	29.66	5.5	3	27.9	0	3.40093	1.14029	1.86094	1.01733	71.944	4.38277	0	1	0	0	0	1	0	181	7.39	191	0	0
2	33	120	90	110	80	115	85	160	58	70	22.66	68	203.02	68	85.77	53.24	167.1	114.18	278	1.28	0.87	2.36	1	0.21	17.2	2	11.45	9.6	4	42.05	0	5.25142	1.28871	3.2836	1.37713	126.944	4.76077	0	0	0	0	0	0	0	154	8.09	356	0	0
1	30	100	80	90	60	95	70	176	57	75	18.4	50	164.96	88	97.43	39.63	57.5	83.61	321	1.05	0.78	5.05	3	0.24	41.8	1	13.9	4.8	2	36.67	0	4.26694	0.943679	2.80931	1.02509	108.608	5.40797	0	1	0	0	0	0	0	162	6.44	246	0	0
2	36	110	70	90	60	100	65	148	42	68	19.17	54	170.99	60	68.06	65.05	47.5	68.42	236	1.49	0.67	5.09	3	0.31	52.7	3	15.48	5	2	23.7	0	4.42292	0.772235	2.38634	1.68262	92.256	3.77775	0	0	0	0	0	0	0	151	6.15	302	0	0
1	26	120	80	110	70	115	75	183	71	80	21.2	58	187.35	79	94.07	35.07	26.1	159.2	451	1.05	0.88	1.59	1	0.4	156.1	2	14.77	5.4	3	51.7	0	4.84609	1.79684	3.11536	0.907139	120.44	5.22147	0	1	0	0	0	1	0	161	9.97	244	0	0
2	26	100	80	90	60	95	70	165	48	70	17.63	59	131.42	67	83.86	63.85	15.2	42.02	217	1.37	0.48	5.56	4	0.1	43.8	3	10.59	4.8	1	13.5	0	3.39938	0.474266	1.53042	1.65158	59.166	4.65475	0	0	0	0	0	0	0	155	5.37	210	0	0
1	60	120	80	110	70	115	75	172	57	75	19.27	73	165.52	62	82.4	40.08	114.7	61.29	209	1.03	0.8	11.01	4	0.33	316.4	4	11.84	10.3	4	27.78	0	4.28143	0.691761	2.92763	1.03673	113.182	4.57371	0	0	0	0	0	1	0	186	8.19	205	0	0
2	31	110	70	100	60	105	65	158	41	75	16.42	61	175.29	63	78.68	54.72	162.1	68.05	306	1.23	0.73	4.4	2	0.47	36.4	2	15.34	6.3	3	29.05	0	4.53414	0.768059	2.76668	1.41542	106.96	4.36723	0	0	0	0	0	0	0	142	6.72	296	0	0
2	34	110	80	100	70	105	75	166	53	70	19.23	60	146.59	77	85.45	69.03	7.2	79.63	266	1.44	0.49	4.6	3	0.1	19.1	2	18.28	4.8	1	14.28	0	3.79177	0.898758	1.59426	1.78557	61.634	4.74301	0	0	0	0	0	0	0	144	8.4	300	0	0
2	36	115	81	105	72	110	76.5	156	78	95	32.05	68	201.49	59	93.13	30.37	173.6	164.01	372	1.06	1.04	5.01	3	0.46	109.2	3	12.02	5.1	2	63.85	1	5.21185	1.85113	3.57781	0.785566	138.318	5.16929	0	1	0	0	0	0	0	177	8.08	210	0	0
2	40	163	113	152	103	157.5	108	155	52	51	21.64	76	166.35	56	90.63	52.95	223.8	74.07	255	1.36	0.69	4.79	3	0.46	13.3	2	10.29	6.6	3	29.9	0	4.3029	0.836005	2.55008	1.36963	98.586	5.03053	0	0	0	1	0	0	0	163	6.39	241	0	0
2	38	117	82	107	73	112	77.5	152	70.5	87	30.51	62	167.45	60	98.33	32.82	46.2	163.36	220	1	0.74	0.54	1	0.54	69.6	3	16.34	6.5	3	39.38	0	4.33135	1.84379	2.6373	0.848939	101.958	5.45793	0	1	0	0	0	0	0	149	8.75	221	0	0
1	37	102	71	90	68	96	69.5	157	48	74	19.47	60	157.82	83	96.35	32.75	436.5	234.78	423	1.11	0.69	3.97	2	0.35	130	1	22.29	4.9	2	40.98	0	4.08226	2.64989	2.02054	0.847129	78.114	5.34802	0	1	0	0	0	1	0	177	7.72	197	0	0
1	74	119	76	109	68	114	72	161	62	94	23.77	71	255.34	89	87.33	52.42	234.7	82.68	317	1.44	1.22	2.2	1	0.41	94.4	1	27.89	5.3	3	54.59	1	6.60476	0.933183	4.82111	1.35592	186.384	4.84736	0	1	0	0	0	0	0	138	5.47	265	1	1
1	50	122	83	112	75	117	79	173	62	81	20.72	86	165.31	70	85.14	46.5	596.6	94.17	372	1.23	0.67	2.72	2	0.22	168.5	2	19.91	4.7	1	26.02	0	4.276	1.06287	2.58603	1.20279	99.976	4.7258	0	0	0	0	0	1	0	179	5.36	234	0	0
2	43	123	83	113	72	118	77.5	157	70	87	28.4	63	129.68	72	78.72	41.12	14.2	66.01	408	1.06	0.57	6.38	4	0.38	46.8	3	12.49	5.2	2	15.53	0	3.35437	0.745034	1.94925	1.06363	75.358	4.36945	0	0	0	0	0	0	0	176	9.9	245	0	0
1	71	139	81	129	73	134	77	179	75	88	23.41	55	198.58	84	106.77	42	257.2	68.23	389	1.17	0.95	0.24	1	0.6	297.8	3	16.92	5.5	3	29.32	0	5.13658	0.77009	3.69721	1.08639	142.934	5.9264	0	0	0	0	0	0	0	170	7.84	184	0	0
2	55	118	80	107	74	112.5	77	147	50	75	23.14	49	203.77	53	91.81	51.92	18.1	86.11	364	1.21	0.9	3.23	2	0.31	89.8	3	12.43	6.4	3	35.11	0	5.27082	0.971896	3.48236	1.34299	134.628	5.09603	0	0	0	0	0	0	0	153	6.54	269	0	0
1	60	125	81	115	75	120	78	177	77	90	24.58	58	142.15	86	103.4	52.97	81.2	51.56	326	1.24	0.6	0.61	1	0.4	380.1	4	22.16	5.3	3	17.71	0	3.67693	0.581941	2.04004	1.37015	78.868	5.73934	0	0	0	0	0	0	0	180	6.37	197	0	0
1	27	101	81	91	68	96	74.5	172	62.5	76	21.13	60	185.62	81	96.53	46.08	20.9	148.92	467	1.22	0.78	2.34	1	0.28	105.6	1	11.93	7.3	4	40.66	0	4.80135	1.68081	2.83901	1.19193	109.756	5.35802	0	0	0	0	0	0	0	170	6.2	230	0	0
2	29	101	73	91	66	96	69.5	162	45	72	17.15	60	146.66	61	88.92	56.35	39.8	86.11	215	1.35	0.57	5.7	4	0.33	47.3	3	13.2	4.7	1	18.79	0	3.79359	0.971896	1.89053	1.45758	73.088	4.93561	0	0	0	0	0	0	0	143	6.42	256	0	0
2	66	163	113	152	102	157.5	107.5	153	43	79	18.37	65	208.49	75	89.52	52.94	102.9	99.26	431	1.35	0.88	5.17	3	0.51	24.1	2	20.39	4.9	2	40.27	0	5.39291	1.12032	3.51004	1.36937	135.698	4.96892	0	0	0	1	0	0	0	171	6.32	218	0	0
1	24	115	75	105	68	110	71.5	172	52	67	17.58	0	175.63	68	92.12	47.95	19.3	86.29	340	1.19	0.73	3.21	2	0.22	243.1	3	16.92	5.9	3	31.07	0	4.54294	0.973928	2.85623	1.2403	110.422	5.11323	0	0	0	0	0	0	0	157	3.56	169	0	0
1	20	101	77	91	63	96	70	172	57	69	19.27	60	137.44	82	96.25	51.89	16.5	100.1	379	1.2	0.58	2.48	1	0.32	157.7	2	11.84	4.8	2	20.05	0	3.5551	1.1298	1.69503	1.34221	65.53	5.34247	0	0	0	0	0	0	0	165	7.79	331	0	0
1	28	91	72	86	58	88.5	65	161	49	66	18.9	60	110.62	95	86.67	34.2	51.4	84.9	378	1	0.51	7.05	4	0.42	137.9	2	21.39	6	3	17.69	0	2.86136	0.958239	1.53751	0.884635	59.44	4.81072	0	1	0	0	0	1	0	167	11.29	221	0	0
1	18	101	72	91	66	96	69	171	48.5	62	16.59	60	158.24	76	96.77	53.65	38.2	74.34	338	1.25	0.68	5.72	4	0.21	18.7	1	33.09	4.3	1	25.16	0	4.09312	0.839052	2.3208	1.38774	89.722	5.37134	0	0	0	0	0	0	0	179	5.43	186	0	0
1	53	101	75	91	58	96	66.5	158	46	75	18.43	60	124.9	74	86.18	36.22	102.6	71.01	290	0.99	0.6	5.55	4	0.3	111.3	1	16.49	4.2	1	20.34	0	3.23073	0.801467	1.92649	0.936886	74.478	4.78353	0	1	0	0	0	0	0	162	9.07	228	0	0
2	29	90	65	85	55	87.5	60	168	49	78	17.36	70	140.77	54	89.55	63.89	10.7	65.36	200	1.34	0.51	5.58	4	0.23	6.4	1	12.84	4.8	1	14.79	0	3.64123	0.737698	1.65049	1.65261	63.808	4.97058	0	0	0	0	0	0	0	135	5.21	229	0	0
1	34	121	80	110	74	115.5	77	160	55	78	21.48	53	209.67	95	50.87	52	360.6	130.48	279	1.35	0.88	4.2	2	0.29	421.5	4	14.98	4.8	2	43.39	0	5.42344	1.47269	3.40336	1.34506	131.574	2.8236	0	0	0	0	0	0	0	206	6.33	144	0	0
1	28	111	83	101	72	106	77.5	177	65	76	20.75	60	218.19	74	63.06	42.32	61.3	347.24	508	1.18	0.78	5.04	3	0.36	421.5	4	17.64	5.2	2	57.51	1	5.64382	3.91919	2.75277	1.09467	106.422	3.50022	0	1	0	0	0	0	1	183	5.05	246	0	0
2	32	110	82	101	75	105.5	78.5	156	40	63	16.44	60	135.99	72	88.54	48.71	12.6	95.65	215	1.31	0.56	5.52	4	0.36	5.9	1	15.3	5.3	2	20.65	0	3.51759	1.07957	1.7628	1.25996	68.15	4.91452	0	0	0	0	0	0	0	111	8.64	271	0	0
1	20	120	78	111	69	115.5	73.5	182	69	78	20.83	80	166.83	88	89.2	45.2	52.7	133.26	452	1.15	0.68	5.36	4	0.25	250.2	3	16.67	5.2	2	34.33	0	4.31531	1.50406	2.45675	1.16917	94.978	4.95115	0	0	0	0	0	0	0	139	9.04	276	0	0
2	31	131	81	121	71	126	76	155	62.5	89	26.01	59	168.63	45	78.86	58.01	59.7	98.89	282	1.63	0.75	25.36	4	0.25	29.5	2	16.81	10.5	4	29.44	0	4.36187	1.11614	2.34977	1.50052	90.842	4.37722	0	0	0	0	0	0	0	145	5.05	159	0	0
1	43	115	75	105	65	110	70	167	66.5	80	23.84	60	164.13	73	101.98	46.16	579.8	90.83	349	1.11	0.74	3.38	2	0.53	191.2	2	13.6	7.3	4	30.99	0	4.24547	1.02517	2.58158	1.194	99.804	5.66052	0	0	0	0	0	0	1	162	5.33	210	0	0
1	24	121	81	111	74	116	77.5	155	52	75	21.64	60	188.94	60	82.22	65.25	85.3	316.02	420	1.85	0.65	5.37	4	0.5	455	4	15.52	5	2	45.96	0	4.88722	3.56682	1.56456	1.68779	60.486	4.56372	0	1	0	0	0	0	0	158	4.58	203	0	0
2	39	116	76	106	66	111	71	171	66.5	80	22.74	80	147.15	65	94.1	51.53	51.4	82.03	287	1.23	0.6	5.43	3	0.31	31.4	2	11.9	5.1	2	20.58	0	3.80626	0.925847	2.04899	1.3329	79.214	5.22313	0	0	0	0	0	0	0	179	11.82	139	0	0
1	50	142	102	133	93	137.5	97.5	174	70	95	23.12	75	258.12	53	107.12	76.9	189.9	81.66	328	1.67	1.1	16.86	4	0.62	367.5	4	23.6	6.6	4	55.79	1	6.67667	0.92167	4.26508	1.98914	164.888	5.94583	0	1	0	1	0	1	1	168	7.7	225	1	1
1	34	120	78	110	68	115	73	167	56	68	20.08	60	125.73	96	110.49	67.62	89.8	154.75	423	1.68	0.36	4.09	2	0.29	134.2	2	36.72	4.1	1	8.98	0	3.2522	1.74661	0.702535	1.74909	27.16	6.13288	0	0	0	0	0	1	1	182	11.81	146	0	0
2	28	118	82	108	76	113	79	154	60.5	90	25.51	56	285.02	40	83.02	58.82	103.2	334.55	212	1.84	1.36	8.6	4	1.24	12.3	2	7.34	5.6	3	85.44	1	7.37248	3.77596	4.12028	1.52147	159.29	4.60813	0	1	0	0	0	0	0	135	9.58	273	1	0
1	37	130	85	125	78	127.5	81.5	171	64.5	83	22.06	51	172.17	80	93.93	33.45	91.4	159.38	331	1.06	0.85	5.15	3	0.31	382.3	4	18.21	4.8	2	52.5	0	4.45344	1.79887	2.76368	0.865235	106.844	5.2137	0	1	0	0	0	0	0	170	4.75	245	0	0
2	37	115	78	105	67	110	72.5	149	50	78	22.52	53	150.89	73	88.68	46.09	49.1	76.48	260	1.13	0.63	2.7	1	0.24	33.4	2	17.5	5	2	26.31	0	3.903	0.863205	2.31516	1.19219	89.504	4.92229	0	0	0	0	0	0	0	148	9.34	244	0	0
1	30	120	78	110	63	115	70.5	176	51	80	16.46	60	177.51	72	83.72	35.83	190.8	191.25	286	1.04	0.78	5.72	4	0.36	160.4	2	19.91	4.3	1	46.75	0	4.59157	2.15858	2.67538	0.926798	103.43	4.64698	0	1	0	0	0	1	0	170	5.21	237	0	0
2	24	110	76	105	65	107.5	70.5	166	47	66	17.06	80	141.88	77	80.59	59.87	337.5	62.86	267	1.26	0.57	5.5	4	0.29	2.9	1	19.91	4.6	1	18.83	0	3.66994	0.709481	1.79612	1.54863	69.438	4.47325	0	0	0	0	0	0	0	147	6.44	251	0	0
2	21	112	76	102	68	107	72	158	39	61	15.62	70	143.47	76	100.63	60.33	69	92.6	236	1.26	0.55	5.12	3	0.25	7.9	1	36.21	5.1	2	21.81	0	3.71107	1.04515	1.6715	1.56053	64.62	5.58559	0	0	0	0	0	0	0	153	6.45	334	0	0
1	27	135	95	125	87	130	91	171	57	70	19.49	60	178.06	78	140.18	45.2	643.4	153.27	428	1.2	0.77	5.17	3	0.38	207.6	3	20.45	6.7	4	41.54	0	4.60579	1.72991	2.64371	1.16917	102.206	7.78086	0	0	0	1	1	1	0	179	6.51	234	0	0
2	72	135	85	125	77	130	81	151	45	75	19.74	60	146.74	50	79.9	40.4	629.9	73.98	211	1	0.7	4.75	3	1.39	28.5	2	14.91	7.5	4	25.84	0	3.79565	0.834989	2.36793	1.04501	91.544	4.43495	1	0	0	1	0	0	0	141	4.2	195	0	0
1	31	122	83	112	76	117	79.5	173	64	74	21.38	60	133.63	73	88.82	38.52	347.9	84.72	364	1.01	0.6	1.38	1	0.21	201.9	3	18.74	4.8	2	23.22	0	3.45654	0.956208	2.02188	0.996379	78.166	4.93006	0	1	0	0	0	0	0	182	5.7	168	0	0
1	35	105	75	95	66	100	70.5	169	59.5	78	20.83	62	137.24	73	90.59	56.05	205	112.89	287	1.34	0.53	5.8	4	0.13	100	1	16.7	4.6	1	22.03	0	3.54992	1.27415	1.51609	1.44982	58.612	5.02831	0	0	0	0	0	1	0	177	9.84	302	0	0
2	50	180	125	170	115	175	120	160	59	86	23.05	58	221.59	63	94.48	41.79	970.1	87.04	336	1.09	1.07	4.08	2	0.56	287.1	4	16.92	6.3	3	58.45	1	5.73176	0.982393	4.20052	1.08096	162.392	5.24423	1	1	0	1	0	0	0	168	8.98	319	0	1
2	72	140	85	135	76	137.5	80.5	149	39	63	17.57	75	227.76	70	85.73	41.61	41.4	67.59	302	1.18	1.09	4.84	3	0.29	174.6	4	19.67	4.8	1	46.78	0	5.89136	0.762867	4.46539	1.07631	172.632	4.75855	1	1	0	1	0	0	0	182	5.85	223	0	1
1	48	122	78	112	68	117	73	159	69	96	27.29	60	169.88	61	104.66	30.89	95.6	183.01	379	0.93	0.82	5.2	3	0.51	441.1	4	18	5.1	2	53.01	0	4.39421	2.06558	2.64842	0.799017	102.388	5.80928	0	1	0	0	0	1	0	169	7.74	351	0	0
1	57	125	80	115	73	120	76.5	169	53	75	18.56	60	148.26	77	114.41	45.25	604.8	61.19	260	1.04	0.69	4.14	2	0.29	7.9	1	21.86	5.5	3	23.06	0	3.83497	0.690632	2.34796	1.17046	90.772	6.35047	0	0	0	0	0	1	0	153	5.81	312	0	0
1	27	100	75	90	65	95	70	175	62	74	20.24	60	138.63	70	68.54	39.08	12.9	122.15	346	1.11	0.62	2.67	2	0.34	295.3	3	17.32	7.5	4	28.61	0	3.58588	1.37867	1.94309	1.01086	75.12	3.8044	0	1	0	0	0	1	0	189	8.93	238	0	0
2	29	118	76	108	69	113	72.5	153	51	62	21.79	59	153.59	55	81.32	63.69	36	83.06	190	1.48	0.6	2.09	1	0.37	49.2	3	11.51	11.6	4	24.38	0	3.97284	0.937472	1.89571	1.64744	73.288	4.51377	0	0	0	0	0	0	0	151	6.57	378	0	0
1	44	105	80	100	75	102.5	77.5	178	80	92	25.25	60	172.38	85	84.66	37.82	543	160.49	367	1.09	0.79	2.32	1	0.41	307.4	4	20.39	5.7	3	52.31	0	4.45887	1.8114	2.65034	0.978272	102.462	4.69916	0	1	0	0	0	0	1	175	6.29	256	0	0
1	27	118	78	108	67	113	72.5	169	64	82	22.41	60	114.57	95	83.2	34.4	20.3	105.38	538	0.99	0.56	2.63	2	0.37	170.2	2	19.12	4.9	2	23.85	0	2.96353	1.18939	1.52856	0.889809	59.094	4.61812	0	1	0	0	0	1	1	197	11.03	240	0	0
2	48	120	80	110	70	115	75	160	69	80	26.95	49	189.57	68	92.54	46.05	74.8	106.12	233	1.18	0.93	2.84	2	0.65	4.4	1	10.51	4.9	2	58.4	1	4.90352	1.19774	3.16337	1.19115	122.296	5.13655	0	0	0	0	0	0	0	128	4.64	274	0	0
2	50	122	82	113	76	117.5	79	161	51.5	69	19.87	51	158.03	67	91.77	55.26	312.7	71.2	253	1.28	0.66	4.6	3	0.9	7.4	1	16.85	5.2	2	26.96	0	4.08769	0.803612	2.28996	1.42938	88.53	5.09381	0	0	0	0	0	0	0	110	6.41	289	0	0
1	47	121	80	101	76	111	78	166	57	71	20.69	60	175.5	83	70.97	58.61	421	51.38	300	1.3	0.77	5.41	4	0.14	122.2	1	20.96	4.5	1	29.87	0	4.53958	0.57991	2.75773	1.51604	106.614	3.93928	0	0	0	0	0	1	1	184	5.19	189	0	0
1	54	160	95	150	85	155	90	170	73	86	25.26	60	190.33	77	90.32	80.68	241.7	49.06	286	1.79	0.7	3.79	2	0.3	162.6	2	19.19	4.9	2	30.07	0	4.92318	0.553725	2.58246	2.08691	99.838	5.01332	1	0	0	1	0	0	0	167	7.77	199	0	0
1	39	142	102	136	92	139	97	172	64.5	82	21.8	60	158.72	88	94.17	43.98	212.4	85.74	456	1.15	0.74	4.36	3	0.24	227.8	3	14.42	5.5	3	42.48	0	4.10554	0.96772	2.52437	1.13761	97.592	5.22702	1	0	0	1	0	0	0	178	8.41	198	0	0
1	22	105	76	100	69	102.5	72.5	171	57	76	19.49	60	181.6	85	91.25	48.15	61	73.79	357	1.16	0.78	4.65	3	0.18	270.3	3	21.06	4.6	1	31.58	0	4.69736	0.832844	3.07015	1.24547	118.692	5.06494	0	0	0	0	0	1	0	179	5.35	232	0	0
1	34	130	86	125	78	127.5	82	169	61	78	21.36	60	138.83	74	96.7	51.46	8.8	98.25	291	1.23	0.53	5.47	4	0.17	169.1	2	16.13	4.9	2	22.54	0	3.59105	1.10892	1.75168	1.33109	67.72	5.36745	0	0	0	0	0	0	0	173	4.82	244	0	0
2	64	170	115	165	105	167.5	110	148	51	89	23.28	68	241.72	71	101.04	52.4	93.3	145.24	370	1.48	1.05	2.07	1	0.38	1.5	1	23.54	10.4	4	54.61	1	6.25246	1.63928	4.14568	1.35541	160.272	5.60835	0	1	0	1	0	0	0	162	7.28	344	1	1
2	38	100	76	90	66	95	71	158	56	82	22.43	80	155.9	61	89	47.97	335.2	48.81	258	1.17	0.7	0.9	1	0.4	50.2	3	19.5	18.4	4	22.22	0	4.03259	0.550903	2.53927	1.24082	98.168	4.94005	0	0	0	0	0	0	0	148	6.44	182	0	0
2	19	118	76	108	66	113	71	156	51.5	68	21.16	60	208.79	51	96.6	74.06	114.4	65.58	312	1.63	0.75	4.16	2	0.2	29.5	2	13.6	5.7	3	29.4	0	5.40067	0.740181	3.14573	1.91568	121.614	5.3619	0	0	0	0	0	0	0	156	5.77	267	0	0
2	38	105	81	100	74	102.5	77.5	162	64	86	24.39	85	121.04	53	86.98	40.33	31.8	54.56	177	1.01	0.52	4.76	3	0.24	1	1	12.18	4.3	1	14.22	0	3.13088	0.615801	1.80543	1.0432	69.798	4.82793	0	0	0	0	0	0	0	89	7.98	314	0	0
1	52	110	75	100	65	105	70	162	59	84	22.48	60	175.18	61	87.92	54.95	75.7	60.95	227	1.21	0.72	3.25	2	0.27	136.9	2	15.69	6.1	3	26.55	0	4.5313	0.687923	2.79462	1.42137	108.04	4.88011	0	0	0	0	0	1	0	163	6.57	151	0	0
2	59	160	110	150	105	155	107.5	149	55	76	24.77	60	238.94	37	97.26	29.58	52.3	310.5	309	1.09	1.1	1.01	1	0.62	113.9	3	16.2	5.5	3	81.86	1	6.18055	3.50451	3.80911	0.765132	147.26	5.39853	0	1	0	1	0	0	0	156	6.24	249	0	0
1	29	120	75	110	68	115	71.5	184	78	73	23.04	60	135.87	73	86.08	28	71.6	93.92	390	0.82	0.66	18.75	4	0.44	90.3	1	22.85	10.5	4	28.9	0	3.51449	1.06005	2.30435	0.724263	89.086	4.77798	0	1	0	0	0	0	0	156	6.69	305	0	0
2	46	119	78	120	80	119.5	79	157	49	61	19.88	88	144.19	76	97.88	55.61	61	70.03	343	1.29	0.61	1.61	1	0.67	59.7	3	25.77	8.3	4	17.84	0	3.72969	0.790406	1.92897	1.43844	74.574	5.43295	1	0	0	1	0	0	0	176	7.43	189	0	0
2	19	140	80	130	80	135	80	160	50	70	19.53	78	147.66	50	91.11	45.79	88.5	62.8	245	1.04	0.6	4.44	2	0.33	8.8	1	14.04	5.5	3	21.62	0	3.81945	0.708804	2.31014	1.18443	89.31	5.05717	0	0	0	0	0	0	0	137	9.5	284	0	0
2	30	135	68	130	65	132.5	66.5	161	47	69	18.13	82	173.23	59	85.98	43.94	86.6	112.17	343	1.15	0.69	5.45	4	0.29	13.3	2	18	5.2	2	33.9	0	4.48086	1.26603	2.76399	1.13658	106.856	4.77242	0	0	0	0	0	0	0	153	6.69	235	0	0
1	23	129	80	130	78	129.5	79	180	68	78	20.99	78	163.81	86	86.88	36.54	73.8	149.59	304	1.11	0.73	4.62	3	0.35	155	2	17.14	4.7	1	33.22	0	4.2372	1.68837	2.51816	0.945163	97.352	4.82238	0	1	0	0	0	0	0	160	7.5	268	0	0
1	27	123	71	120	70	121.5	70.5	157	52	74	21.1	78	161.24	93	79.2	49.74	419.2	141.17	370	1.39	0.64	5.33	4	3.1	176.2	2	25.21	5	2	28.46	0	4.17072	1.59334	2.1538	1.2866	83.266	4.39609	0	0	0	0	0	1	1	178	7.62	236	0	0
1	23	109	60	110	62	109.5	61	169	59	76	20.66	78	120.28	79	76.91	43.77	69	71.23	476	1.08	0.53	2.3	1	0.2	86.8	1	14.42	9.3	4	18.31	0	3.11123	0.80395	1.61055	1.13218	62.264	4.26898	0	0	0	0	0	1	1	171	10.09	224	0	0
1	46	132	78	130	75	131	76.5	161	72	89	27.78	69	199.16	83	149.76	43.1	155.2	97.35	340	1.11	0.91	5.32	4	0.31	252	3	19.12	5	2	42.79	0	5.15158	1.09876	3.53311	1.11485	136.59	8.31261	0	0	0	0	1	0	1	160	6.72	237	0	0
2	32	104	67	100	68	102	67.5	158	50	68	20.03	78	154.45	66	66.05	63.6	70.3	48.54	223	1.27	0.56	96.51	4	1.73	61.7	3	14.11	380.6	4	15.99	0	3.99509	0.547856	2.09886	1.64511	81.142	3.66619	0	0	0	0	0	0	0	135	10.19	203	0	0
2	35	106	70	105	70	105.5	70	149	60	86	27.03	78	125.2	58	84.45	39.03	56.8	201.19	326	1.23	0.5	3.27	2	0.38	17.7	2	11.78	5.1	2	22.87	0	3.23849	2.27077	1.1881	1.00957	45.932	4.6875	0	1	0	0	0	0	0	160	7.79	225	0	0
2	23	103	71	100	70	101.5	70.5	164	57	71	21.19	78	146.13	57	74.69	38.39	81.8	88.46	300	1.03	0.7	5.15	3	0.22	1.5	1	14.88	4.6	1	32.24	0	3.77988	0.99842	2.32923	0.993016	90.048	4.14576	0	1	0	0	0	0	0	130	5.35	274	0	0
2	21	135	116	130	110	132.5	113	163	49	70	18.44	78	258.08	41	77.92	72.78	32.2	146.45	282	1.94	1.19	2.39	1	1.93	31	2	9.58	5.6	3	69.7	1	6.67563	1.65293	4.03544	1.88257	156.01	4.32504	0	1	0	1	0	0	0	144	8.41	283	1	0
1	46	132	82	130	80	131	81	169	65	82	22.76	78	155.42	58	91.57	61.54	12	54.65	302	1.32	0.6	0.65	1	0.24	542.6	4	18	7.7	4	19.21	0	4.02018	0.616817	2.14563	1.59183	82.95	5.0827	0	0	0	0	0	1	1	183	5.86	189	0	0
2	61	137	90	130	90	133.5	90	153	40	68	17.09	78	198.81	53	92.78	78.47	44.6	94.2	455	1.84	0.69	1.87	1	0.27	37.4	2	24.36	5.5	3	32.73	0	5.14252	1.06321	2.62545	2.02975	101.5	5.14987	1	0	0	1	0	0	0	163	5.41	192	0	0
1	68	185	114	180	110	182.5	112	177	82	80	26.17	78	150.02	63	82.78	31.8	30.2	95.6	298	0.97	0.73	1.8	1	0.36	87.8	1	25.37	6	3	35.65	0	3.8805	1.07901	2.56337	0.822556	99.1	4.5948	1	1	0	1	0	0	0	176	5.07	188	0	0
1	33	100	64	100	65	100	64.5	166	63	82	22.86	78	169.36	95	86.36	55.4	519	63.54	310	1.28	0.73	1.81	1	0.31	253.9	3	19.81	7.4	4	25.59	0	4.38076	0.717156	2.61904	1.43301	101.252	4.79352	0	0	0	0	0	1	1	187	6.86	269	0	0
1	38	125	74	120	70	122.5	72	168	56	75	19.84	78	159.79	84	94.9	47.74	100.1	60.12	326	1.26	0.77	5.54	4	0.3	333.6	4	27.39	4.8	2	32.63	0	4.13321	0.678555	2.58733	1.23487	100.026	5.26754	0	0	0	0	0	1	1	186	6.43	288	0	0
2	40	125	72	125	70	125	71	155	49	71	20.4	78	157.22	75	104.73	85.23	61.6	48.91	279	1.62	0.5	5.17	3	0.32	11.3	1	21.33	5.6	3	14.96	0	4.06674	0.552032	1.60911	2.2046	62.208	5.81317	0	0	0	0	0	0	0	121	7.2	274	0	0
1	34	103	67	100	65	101.5	66	163	49	85	18.44	78	172.06	83	92.43	56.36	130.6	86.33	511	1.33	0.8	12.32	4	0.28	132.1	1	19.67	31	4	31.45	0	4.45059	0.974379	2.54615	1.45784	98.434	5.13044	0	0	0	0	0	1	0	170	7.29	233	0	0
1	91	190	109	200	100	195	104.5	142	41	65	20.33	78	111.41	92	111.91	18.83	68.4	134.04	324	0.8	0.58	11.43	4	1.4	336.9	4	38.68	5	2	23.21	0	2.88179	1.51287	1.70129	0.487067	65.772	6.2117	0	1	0	1	0	0	0	152	3.92	138	0	0
1	34	137	81	135	80	136	80.5	173	62.5	95	20.88	0	136.78	82	91.67	53.22	49.1	145.9	291	1.24	0.52	4.4	3	0.26	145.9	2	17.75	4.9	2	19.4	0	3.53802	1.64673	1.40662	1.37662	54.38	5.08825	0	0	0	0	0	1	0	169	6.05	247	0	0
1	24	121	66	120	65	120.5	65.5	175	73	88	23.84	0	183.63	85	83.1	36.67	80.5	146.17	365	1.01	0.88	4.29	3	0.3	207	3	18	5.7	3	55.27	1	4.74987	1.64977	3.04516	0.948526	117.726	4.61257	0	1	0	0	0	0	0	192	7.6	233	0	0
1	44	130	81	130	80	130	80.5	165	63	80	23.14	78	166.86	97	94.1	53.33	69.3	58.72	327	1.26	0.71	0.26	1	0.22	267.2	3	20.56	5.3	3	26	0	4.31609	0.662754	2.63285	1.37946	101.786	5.22313	0	0	0	0	0	0	0	195	7.34	323	0	0
2	31	120	80	120	81	120	80.5	164	56	70	20.82	0	181.62	81	91.22	48.78	76.4	88.28	346	1.19	0.77	5.29	3	0.4	6.4	1	18.46	4.6	1	36.08	0	4.69788	0.996388	2.97941	1.26177	115.184	5.06328	0	0	0	0	0	0	0	142	7.36	242	0	0
2	36	120	80	121	82	120.5	81	181	79	93	24.11	78	181.97	75	86.15	29.35	127.1	277.52	386	0.98	0.8	3.65	2	0.41	203	4	17.14	4.6	1	51.79	0	4.70693	3.13228	2.51205	0.759183	97.116	4.78186	0	1	0	0	0	1	1	150	6.55	216	0	0
1	52	123	78	120	80	121.5	79	176	80	95	25.83	0	235.27	13	78.16	59.91	184.1	130.98	370	1.6	0.97	1.69	1	0.49	614.3	4	26.82	5.8	3	54.68	1	6.08562	1.47833	3.85835	1.54966	149.164	4.33837	0	0	0	0	0	1	1	172	5.58	211	0	0
1	64	114	79	115	80	114.5	79.5	184	74	95	21.86	0	224.18	76	91.22	53.28	776.2	144.42	287	1.38	1.07	3	2	0.39	362.7	4	18.53	10.9	4	58.77	1	5.79876	1.63002	3.67346	1.37817	142.016	5.06328	0	0	0	0	0	1	1	164	6.58	173	0	0
1	43	149	100	145	101	147	100.5	162	64	88	24.39	56	212.26	94	96.78	37.78	147.7	194.62	456	1.13	0.99	4.95	3	0.45	145.9	2	26.69	5.1	2	62.52	1	5.49043	2.19661	3.50636	0.977237	135.556	5.37189	0	1	0	1	0	0	0	179	5.48	222	0	0
2	33	117	77	115	75	116	76	153	44	77	18.8	57	174.97	70	86.26	69.06	70.9	71.88	271	1.41	0.66	4.85	3	0.36	102.5	3	16.67	5.9	3	26.55	0	4.52587	0.811287	2.36767	1.78634	91.534	4.78797	0	0	0	0	0	0	0	108	3.48	310	0	0
2	43	129	73	130	70	129.5	71.5	157	49	70	19.88	54	166.79	56	84.87	68.03	141.7	79.85	316	1.56	0.67	1.71	1	1.6	31.4	2	16.99	5.3	2	29.26	0	4.31428	0.901242	2.14149	1.7597	82.79	4.71081	0	0	0	0	0	0	0	142	6.9	230	0	0
1	19	129	59	130	60	129.5	59.5	179	64	78	19.97	75	109.54	70	82.92	41.82	118.9	54.47	403	0.98	0.5	0.74	1	0.11	26.5	1	15.69	4.8	2	14.62	0	2.83342	0.614786	1.46989	1.08174	56.826	4.60258	0	0	0	0	0	0	0	182	8.35	406	0	0
1	45	148	89	145	85	146.5	87	164	69	90	25.65	81	234.93	85	96.29	48.3	33.4	214.45	475	1.43	1.04	2.74	2	0.36	224.8	3	20.79	7.7	4	78.72	1	6.07682	2.42043	3.71805	1.24935	143.74	5.34469	0	1	0	1	0	0	0	151	6.65	225	0	0
2	39	136	85	135	80	135.5	82.5	163	73	91	27.48	78	196.67	53	103.89	59.75	88.2	92.36	415	1.53	0.84	8.85	4	0.47	20.6	2	17.25	7.1	4	40.84	0	5.08717	1.04244	3.06384	1.54553	118.448	5.76654	0	0	0	0	0	0	0	146	8.9	341	0	0
1	43	115	73	115	70	115	71.5	174	56	75	18.5	52	151.61	86	90.91	64.24	76.4	76.7	447	1.49	0.65	0.09	1	0.46	259.3	3	23.14	7.8	4	27.82	0	3.92162	0.865688	1.86317	1.66167	72.03	5.04607	0	0	0	0	0	1	1	288	8.96	235	0	0
2	23	111	67	110	65	110.5	66	161	52.5	70	20.25	56	126.32	58	75.07	54.78	70.9	46.6	182	1.15	0.52	5.51	4	0.39	20.1	2	10.96	4.9	2	17.57	0	3.26746	0.525959	1.60942	1.41697	62.22	4.16685	0	0	0	0	0	0	0	173	5.75	212	0	0
2	28	107	69	105	70	106	69.5	152	43	64	18.61	53	134.63	54	77.02	52.73	30.9	89.39	265	1.17	0.54	5.48	4	0.33	125.8	4	17.32	4.9	2	20.44	0	3.48241	1.00892	1.65603	1.36394	64.022	4.27509	0	0	0	0	0	0	0	170	7.64	161	0	0
2	22	115	75	110	75	112.5	75	154	51	65	21.5	69	171.57	67	85.46	45.57	15.5	62.99	386	1.11	0.75	1.41	1	0.27	97.4	3	18.21	5.4	2	29.96	0	4.43792	0.710948	2.93332	1.17874	113.402	4.74356	0	0	0	0	0	0	0	178	5.47	227	0	0
1	34	121	75	120	75	120.5	75	171	57	71	19.49	55	198.54	82	92.19	44.38	73.8	0.09	397	1.33	0.78	3.63	2	0.33	378.7	4	17.21	9	4	55.93	1	5.13554	0.0010158	3.98712	1.14796	154.142	5.11712	0	0	0	0	0	1	1	108	3.43	322	0	0
1	20	120	80	110	70	115	75	163	51	70	19.2	60	158.93	57	94.49	43.7	0.4	145.4	429	1.13	0.72	3.33	2	0.03	108.2	1	70.3	5.1	2	29.57	0	4.11097	1.64108	2.2284	1.13037	86.15	5.24478	0	0	0	0	0	1	0	193	6.34	219	0	0
1	21	100	80	90	70	95	75	165	55	73	20.2	60	154.14	62	86.88	34.63	926.8	114.55	410	0.97	0.73	1.38	1	0.25	224.3	3	30.85	4.9	2	32.61	0	3.98707	1.29289	2.49871	0.895758	96.6	4.82238	0	1	0	0	0	1	0	164	5.78	300	0	0
2	31	150	90	140	80	145	85	166	48	78	17.42	63	165.37	56	91.26	63.25	61.9	54.35	258	1.3	0.63	5.55	4	0.27	13.3	2	12.3	6.3	3	19.44	0	4.27755	0.613431	2.36032	1.63606	91.25	5.0655	0	0	0	1	0	0	0	183	12.75	374	0	0
2	62	130	90	120	80	125	85	149	48	80	21.62	60	194.69	42	94.45	55.18	110.9	61.66	217	1.34	0.81	3.18	2	0.52	84.7	3	15.19	5.7	3	34.97	0	5.03595	0.695937	3.28965	1.42732	127.178	5.24256	0	0	0	0	0	0	0	168	5.88	232	0	0
1	61	150	100	140	90	145	95	174	87	83	28.74	60	154.14	86	105.87	28.13	148.6	374.95	497	0.99	0.64	3.07	2	0.67	282.7	3	17.61	5.1	2	38.14	0	3.98707	4.23194	1.31971	0.727625	51.02	5.87644	0	1	0	1	0	0	0	163	7.28	248	0	0
1	32	120	80	110	70	115	75	171	66	80	22.57	60	144.02	74	105.29	35.02	280.3	95.47	318	0.93	0.7	20.98	4	0.4	222.5	3	17.14	136.7	4	27.55	0	3.7253	1.07754	2.32556	0.905846	89.906	5.84425	0	1	0	0	0	0	0	192	7.27	161	0	0
2	75	125	75	120	80	122.5	77.5	160	60	88	23.44	85	138.13	43	92.06	47.78	54.6	87.23	238	1.3	0.55	3.13	2	0.47	333.6	4	22.02	5.5	3	18.06	0	3.57294	0.984537	1.88577	1.2359	72.904	5.1099	0	0	0	0	0	0	0	162	3.67	162	0	0
2	86	117	70	120	80	118.5	75	160	48	80	18.75	70	200.58	56	81.33	48.39	224.4	75.18	390	1.21	0.91	17.26	4	2.14	101.5	3	18.32	12.3	4	36.55	0	5.18831	0.848533	3.5477	1.25168	137.154	4.51432	0	0	0	0	0	0	0	159	6.51	221	0	0
2	40	120	80	110	70	115	75	145	40	83	19.02	0	164.33	54	90.32	76.99	170.5	44.71	213	1.63	0.56	1.52	1	0.13	17.7	2	8.53	9.2	4	18.04	0	4.25065	0.504628	2.02788	1.99146	78.398	5.01332	0	0	0	0	0	0	0	147	6.06	266	0	0
1	30	119	79	120	80	119.5	79.5	170	70	85	24.22	65	147.9	64	85.56	41.36	321.2	63.52	345	1.06	0.66	1.4	1	0.25	78.2	1	17.61	4.8	2	22.1	0	3.82566	0.71693	2.42721	1.06984	93.836	4.74911	0	0	0	0	0	0	0	198	6.66	175	0	0
2	29	123	75	120	80	121.5	77.5	166	60	85	21.77	70	165.92	82	89.94	41.08	28.9	54.34	278	1.11	0.79	5.59	4	0.93	51.2	3	20.42	5.1	2	30	0	4.29177	0.613318	2.94806	1.0626	113.972	4.99223	0	0	0	0	0	0	0	151	6.25	212	0	0
2	89	122	78	120	80	121	79	150	50	70	22.22	80	268.72	37	79.03	36.4	467.4	129.37	202	1.08	1.46	4.05	2	0.92	159.9	4	29.77	6.8	3	78.29	1	6.95085	1.46016	5.34004	0.941542	206.446	4.38666	0	1	0	0	0	0	0	166	5.68	185	1	1
2	38	120	70	110	65	115	67.5	148	39	60	17.8	60	147.42	52	103.24	40.62	82.1	89.82	290	1.05	0.7	7.52	4	0.6	38.4	2	18.84	10.8	4	22.89	0	3.81324	1.01377	2.29788	1.0507	88.836	5.73046	0	0	0	0	0	0	0	146	6.07	272	0	0
2	28	122	85	120	80	121	82.5	165	50	86	18.37	66	237.53	41	76.12	79.66	57.5	144.47	187	2	0.95	2.67	1	0.68	9.3	1	9.61	17.6	4	46.26	0	6.14408	1.63059	3.33616	2.06053	128.976	4.22513	0	0	0	0	0	0	0	130	10.6	222	0	0
2	52	130	90	120	80	125	85	156	61	88	25.07	59	186.86	54	117.85	43.46	118.5	137.99	384	1.21	0.83	2.82	1	0.37	327.6	4	14.04	10	4	40	0	4.83342	1.55745	2.9954	1.12416	115.802	6.54141	0	0	0	0	0	0	0	176	8.39	202	0	0
1	40	110	80	100	60	105	70	161	50	70	19.29	59	188.45	60	84.24	57.31	934.3	73.61	320	1.37	0.79	5.17	3	0.29	54.7	1	20.69	4.7	1	31.53	0	4.87455	0.830813	3.01133	1.48241	116.418	4.67584	0	0	0	0	0	1	0	204	7.28	155	0	0
2	75	130	80	120	70	125	75	159	48	83	18.99	70	168.84	58	81.85	57.53	131.2	72.96	262	1.3	0.69	4.61	3	0.74	28.5	2	18.39	7.2	4	23.97	0	4.3673	0.823476	2.50176	1.4881	96.718	4.54318	0	0	0	0	0	0	0	171	6.35	310	0	0
1	86	180	110	110	100	145	105	142	66	92	32.73	77	228.17	71	95.67	24.3	943.5	239.33	493	0.95	1.27	1.36	1	0.53	28	1	24.29	6.2	3	82.58	1	5.90197	2.70124	4.03528	0.628557	156.004	5.31028	1	1	0	1	0	1	0	176	5.44	246	0	0
1	38	130	80	120	70	125	75	180	80	100	24.69	68	218.05	64	97.33	28.35	42.7	207.65	470	0.9	1.06	2	1	0.17	157.2	2	10	8.3	4	75.16	1	5.6402	2.34368	3.83264	0.733316	148.17	5.40242	0	1	0	0	0	0	0	185	4.66	222	0	0
1	38	130	80	120	70	125	75	171	59	70	20.18	59	139.72	84	77.16	28.56	69.3	91.95	278	0.85	0.73	13	4	0.66	100	1	16.23	114.4	4	35.69	0	3.61407	1.03781	2.39964	0.738748	92.77	4.28286	0	1	0	0	0	1	0	185	8.8	250	0	0
1	88	170	100	160	90	165	95	164	52	72	19.33	60	182.42	64	88.48	51.31	148	79.63	340	1.24	0.8	1.43	1	0.56	107.2	1	32.83	5.8	3	30.05	0	4.71857	0.898758	2.97941	1.32721	115.184	4.91119	0	0	0	1	0	0	0	139	4.94	248	0	0
2	34	110	80	100	60	105	70	158	53	75	21.23	58	184.71	66	85.74	62.86	226.4	41.56	246	1.44	0.73	5.59	4	0.29	20.6	2	15.73	4.9	2	24.43	0	4.77781	0.469074	2.93683	1.62597	113.538	4.7591	0	0	0	0	0	0	0	143	4.87	233	0	0
2	45	130	80	120	70	125	75	154	48	65	20.24	60	146.59	57	93.44	49.65	130	42.95	310	1.14	0.62	4.58	3	0.42	92.8	3	12.12	4.7	1	17.51	0	3.79177	0.484763	2.28531	1.28427	88.35	5.1865	0	0	0	0	0	0	0	145	5.69	279	0	0
1	20	120	80	110	70	115	75	173	71	88	23.72	60	146.94	78	91.57	45.3	43.4	75.47	376	1.12	0.62	4.81	3	0.23	120.1	1	20.45	5.3	3	20.41	0	3.80083	0.851806	2.23864	1.17175	86.546	5.0827	0	0	0	0	0	0	0	168	6.89	237	0	0
1	19	100	70	90	60	95	65	173	56	73	18.71	60	106.18	83	99.52	46.74	79.9	50.73	453	1.04	0.44	5.52	4	0.15	149.6	2	22.59	5.3	3	13.8	0	2.74651	0.572573	1.27506	1.209	49.294	5.52398	0	0	0	0	0	0	0	176	11.15	202	0	0
1	22	120	80	110	70	115	75	175	60	68	19.59	60	168.01	74	88.55	57.12	108	78.06	378	1.26	0.68	5.32	4	0.33	94.4	1	17.32	4.4	1	26.34	0	4.34584	0.881038	2.46451	1.4775	95.278	4.91508	0	0	0	0	0	0	0	167	4.57	176	0	0
2	45	120	80	110	70	115	75	166	56	85	20.32	60	181.8	60	86.57	51.99	72.2	76.3	175	1.26	0.75	0.26	1	0.24	6.4	1	16.27	6.1	3	31.85	0	4.70253	0.861174	2.96301	1.3448	114.55	4.80517	0	0	0	0	0	0	0	104	4.39	314	0	0
1	44	130	90	120	80	125	85	176	86	92	27.76	60	184.43	72	102.23	36.56	64.8	194.13	365	1.08	0.82	3.63	2	0.4	325.6	4	25.08	4.7	1	54.07	1	4.77056	2.19108	2.82059	0.94568	109.044	5.6744	1	1	0	1	0	1	0	180	7.03	209	0	0
2	26	110	70	90	60	100	65	161	45	69	17.36	61	153.8	43	86.22	50.69	76	72.13	188	1.16	0.65	4.29	2	0.34	4.4	1	16.81	4.8	1	24.62	0	3.97827	0.814108	2.29395	1.31117	88.684	4.78575	0	0	0	0	0	0	0	106	7.74	392	0	0
2	33	120	90	110	70	115	80	157	55	76	22.31	60	253.89	52	95.32	55.96	101.3	83.8	235	1.4	1.15	2.11	1	0.33	1.5	1	12.05	8.2	4	67.76	1	6.56725	0.945824	4.68624	1.44749	181.17	5.29085	0	1	0	0	0	0	0	126	7.32	408	1	1
2	30	120	80	110	70	115	75	158	47	74	18.83	60	166	59	80.35	69.91	50.7	45.64	239	1.35	0.65	3.14	2	0.24	18.2	2	21.43	15.4	4	21.87	0	4.29384	0.515124	2.24941	1.80833	86.962	4.45992	0	0	0	0	0	0	0	144	6.04	331	0	0
2	20	100	70	90	60	95	65	140	44	68	22.45	60	138.69	47	84.45	56.08	16.5	41.84	321	1.18	0.56	4.46	2	0.24	28	2	10.32	6.2	3	15.4	0	3.58743	0.472235	1.92038	1.45059	74.242	4.6875	0	0	0	0	0	0	0	152	7.16	245	0	0
1	28	110	80	100	60	105	70	169	53	72	18.56	60	191.37	70	82.02	41.87	107.7	134.29	332	1.14	0.88	5.32	4	0.26	408.9	4	15.87	4.5	1	51.14	0	4.95008	1.51569	3.17232	1.08303	122.642	4.55262	0	0	0	0	0	1	1	178	11.54	272	0	0
1	36	110	80	100	70	105	75	176	69	68	22.28	52	144.37	89	79.52	34.25	22.9	69.26	340	0.97	0.7	3.82	2	0.17	153.9	2	20.01	4.6	1	27.89	0	3.73435	0.781716	2.49012	0.885929	96.268	4.41385	0	1	0	0	0	1	0	171	5.36	228	0	0
1	29	130	90	120	80	125	85	167	51	69	18.29	58	174.87	78	90.77	50.53	46.9	81.3	302	1.18	0.78	27.75	4	0.94	142.7	2	16.45	140.1	4	35.64	0	4.52328	0.917607	2.79565	1.30704	108.08	5.0383	0	0	0	0	0	1	0	180	6.82	169	0	0
1	22	120	80	110	70	115	75	176	64	67	20.66	60	122.47	90	94.94	51.56	145.8	57.13	477	1.13	0.52	5.76	4	0.24	27	1	14.32	4.3	1	17.74	0	3.16787	0.644808	1.53864	1.33368	59.484	5.26976	0	0	0	0	0	0	0	179	6.03	203	0	0
2	73	170	120	160	110	165	115	147	40	72	18.51	104	154.7	67	96.5	66.66	225.5	87.79	314	1.54	0.57	1.35	1	0.72	264.8	4	30.01	6.7	3	19.75	0	4.00155	0.990858	1.82312	1.72426	70.482	5.35635	0	0	0	1	0	0	0	153	9.73	205	0	0
2	27	120	80	110	70	115	75	164	45	87	16.73	60	128.08	54	86.64	41.96	51.1	74.72	246	1.01	0.55	5.13	3	0.62	6.9	1	11.66	5	2	18.11	0	3.31298	0.843341	1.84108	1.08536	71.176	4.80906	0	0	0	0	0	0	0	154	9.76	205	0	0
2	48	140	90	130	80	135	85	148	44	63	20.09	98	149.36	48	106.81	56.28	20.6	72.59	174	1.31	0.6	0.77	1	0.73	16.7	2	18.6	7.8	4	16.92	0	3.86342	0.8193	2.03213	1.45577	78.562	5.92862	0	0	0	0	0	0	0	142	9.63	293	0	0
1	85	180	120	170	110	175	115	160	57	67	22.27	64	192.89	101	108.03	47.33	107.1	81.95	369	1.15	0.9	6.53	4	1.02	119.6	1	26.59	11.3	4	32.81	0	4.98939	0.924944	3.34118	1.22426	129.17	5.99634	1	0	0	1	0	0	0	146	7.71	294	0	0
1	40	110	80	100	70	105	75	163	46	62	17.31	61	109.37	85	76.26	45.01	83.4	114.83	364	1.09	0.55	5.4	4	22.8	208.7	3	19.3	4.3	1	22.74	0	2.82902	1.29605	1.07072	1.16425	41.394	4.2329	0	0	0	0	0	1	0	154	6	187	0	0
1	36	110	80	100	70	105	75	168	60	69	21.26	62	163.57	79	77.99	39.79	134.7	154.67	346	1.1	0.78	3.88	2	0.26	326.9	4	17.75	5.1	2	42.51	0	4.23099	1.74571	2.4016	1.02923	92.846	4.32893	0	1	0	0	0	1	0	168	8.01	270	0	0
1	26	120	80	110	70	115	75	175	44	60	14.37	84	109.85	58	115.39	34.42	94.3	96.49	145	0.92	0.53	3.71	2	0.41	144.3	2	78.59	5.7	3	18.23	0	2.84144	1.08905	1.45194	0.890326	56.132	6.40486	0	1	0	0	0	0	0	140	7.44	392	0	0
2	30	120	70	110	65	115	67.5	154	47	69	19.82	60	105.83	64	89	53.65	308.1	90.56	230	1.25	0.4	5.15	3	0.4	12.8	2	10.54	4.1	1	13.23	0	2.73745	1.02212	0.881221	1.38774	34.068	4.94005	0	0	0	0	0	0	0	180	5.95	339	0	0
1	34	130	90	120	80	125	85	162	71	87	27.05	79	137.03	72	90.04	35.78	67.7	116.41	335	1.05	0.64	4.37	3	0.31	237.7	3	14.18	5.9	3	29.6	0	3.54449	1.31388	2.01676	0.925504	77.968	4.99778	0	1	0	0	0	1	0	155	9.06	355	0	0
1	37	120	90	110	80	115	85	157	54	82	21.91	60	243.84	86	102.89	48.66	119.8	101.96	473	1.25	1.23	3.7	2	0.2	266	3	16.2	7.6	4	80.88	1	6.30729	1.15079	4.52116	1.25867	174.788	5.71103	0	1	0	0	0	1	1	178	4.98	210	1	1
2	25	120	80	110	70	115	75	160	52	67	20.31	60	176.74	49	84.87	59.3	35.7	30.26	275	1.23	0.71	9.54	4	0.19	13.3	2	17.32	32.5	4	24.22	0	4.57165	0.341535	2.88122	1.53389	111.388	4.71081	0	0	0	0	0	0	0	129	8.81	424	0	0
2	32	120	70	110	60	115	65	162	49	79	18.67	62	172.79	57	101.08	53.75	36	72.22	243	1.21	0.72	2.83	2	0.35	10.3	1	10.96	5.3	2	32.73	0	4.46948	0.815124	2.70554	1.39033	104.596	5.61057	0	0	0	0	0	0	0	158	7.56	331	0	0
1	26	120	70	110	60	115	65	169	57	67	19.96	59	191.71	88	95.84	35.68	174.8	145.5	356	1.02	0.88	5.35	4	0.4	124.8	1	22.65	5.1	2	48.85	0	4.95887	1.64221	3.28324	0.922918	126.93	5.31972	0	1	0	0	0	1	0	164	5.45	181	0	0
1	30	120	85	110	75	115	80	168	68	79	24.09	59	160.8	81	83.41	47.41	143.6	82.69	309	1.19	0.7	4.85	3	0.26	267.8	3	15.12	4.9	2	25.58	0	4.15934	0.933296	2.50523	1.22633	96.852	4.62977	0	0	0	0	0	1	0	179	4.97	195	0	0
2	43	120	90	110	80	115	85	150	57	81	25.33	70	227.96	53	82.13	50.28	128.7	103.62	275	1.26	0.99	2.26	1	0.54	10.8	1	13.1	5.2	2	50.65	0	5.89653	1.16953	4.05991	1.30057	156.956	4.55873	0	0	0	0	0	0	0	122	6.3	339	0	0
1	32	130	90	120	80	125	85	164	57	77	21.19	60	209.8	66	78.86	44.33	14.5	186.53	323	1.32	0.85	4.65	3	0.27	151.8	2	16.99	5.2	2	48.68	0	5.4268	2.1053	3.31516	1.14666	128.164	4.37722	0	0	0	0	0	1	0	175	6.87	276	0	0
2	37	120	90	110	80	115	85	150	50	76	22.22	59	154.35	58	88.06	54.22	160.8	52.12	238	1.17	0.68	4.34	2	0.37	79.7	3	11.66	10	4	21.89	0	3.9925	0.588262	2.32038	1.40248	89.706	4.88788	0	0	0	0	0	0	0	144	8.49	275	0	0
1	62	130	90	120	80	125	85	175	63	75	20.57	60	157.47	75	143.38	40.17	53.6	62.86	384	1.05	0.76	4.06	2	0.25	84.7	1	19.16	8.2	4	33.99	0	4.0732	0.709481	2.70895	1.03906	104.728	7.95848	0	0	0	0	1	0	0	156	7.07	248	0	0
1	44	150	100	140	90	145	95	179	58	80	18.1	60	165.72	94	94.7	36.98	50.7	142.99	374	0.96	0.76	5.83	4	0.15	299.1	3	20.89	4.3	1	34.57	0	4.2866	1.61388	2.59033	0.956544	100.142	5.25644	0	1	0	1	0	0	0	169	6.38	197	0	0
2	33	100	70	90	60	95	65	153	48	83	20.5	59	258.39	49	72.92	95.53	63.5	169.58	229	2.41	1.03	1.35	1	1.94	7.9	1	10.54	8.7	4	55.51	1	6.68365	1.914	3.33533	2.47103	128.944	4.04751	0	1	0	0	0	0	0	106	9.5	322	1	0
1	30	110	70	100	65	105	67.5	170	57	73	19.72	58	131.34	83	83.41	48.93	12.6	36.47	279	1.03	0.56	3.5	2	0.34	196.2	2	21.66	6.1	3	17.18	0	3.39731	0.411625	1.94299	1.26565	75.116	4.62977	0	0	0	0	0	0	0	152	7.23	201	0	0
1	23	110	70	100	60	105	65	170	54	71	18.69	60	138.2	74	81.22	51.13	106.8	54.9	356	1.21	0.59	8.32	4	0.53	133.7	1	23.6	7	4	15.47	0	3.57475	0.619639	1.96818	1.32256	76.09	4.50821	0	0	0	0	0	0	0	172	6.86	216	0	0
1	21	100	70	90	60	95	65	162	51	71	19.43	60	162.25	85	90.63	44.07	52.7	113.63	369	1.14	0.74	2.98	2	0.32	187.3	2	15.27	5	2	30.91	0	4.19684	1.28251	2.46906	1.13994	95.454	5.03053	0	0	0	0	0	0	0	120	6	260	0	0
1	32	120	85	110	75	115	80	172	50	78	16.9	60	233.23	61	71.05	37.8	202.3	134.01	284	1.03	1.05	4.12	2	0.23	174.6	2	15.44	6.6	4	54.41	1	6.03285	1.51253	4.36182	0.977755	168.628	3.94372	0	1	0	0	0	1	0	168	5.23	220	0	1
2	36	100	70	90	60	95	65	161	50	78	19.29	63	180.55	62	85.81	57.76	808.2	48.69	258	1.37	0.73	1.84	1	0.45	5.4	1	18.11	4.9	2	32.84	0	4.6702	0.549549	2.92426	1.49405	113.052	4.76299	0	0	0	0	0	0	0	141	8.35	230	0	0
1	55	120	80	110	70	115	75	170	85	85	29.41	90	236.42	63	98.76	31.67	258.5	301.86	379	0.98	1.12	6.51	4	0.59	24.6	1	21.86	6.3	4	80.39	1	6.11536	3.407	3.73456	0.819193	144.378	5.48179	0	1	0	0	0	1	1	143	6.31	254	0	0
2	49	120	80	110	70	115	75	162	55	87	20.96	75	138.27	47	80.63	52.26	93	41.94	246	1.11	0.56	3.81	2	0.29	33.9	2	12.27	4.9	2	14.1	0	3.57656	0.473363	2.00781	1.35178	77.622	4.47547	0	0	0	0	0	0	0	168	7.55	207	0	0
1	54	155	100	145	95	150	97.5	167	63	73	22.59	60	157.26	92	92.44	39.12	818.1	51.84	332	0.98	0.76	2.13	1	0.59	123.7	1	17.82	6.8	4	26.29	0	4.06777	0.585102	2.78769	1.0119	107.772	5.13099	1	1	0	1	0	1	0	176	10.94	231	0	0
1	27	110	80	100	70	105	75	173	52	76	17.37	85	153.73	67	74.9	43.28	296.2	52.31	332	1.04	0.72	2.98	2	0.26	79.2	1	11.57	20.6	4	27.65	0	3.97646	0.590406	2.58634	1.1195	99.988	4.15742	0	0	0	0	0	1	0	168	6.52	218	0	0
2	64	160	110	150	105	155	107.5	149	49	72	22.07	56	179.03	62	86.05	55.73	25.4	130.12	333	1.42	0.68	3.75	2	0.5	212.7	4	26.89	6.1	3	34.56	0	4.63088	1.46862	2.51619	1.44154	97.276	4.77631	0	0	0	1	0	0	0	157	6.65	219	0	0
1	51	160	110	150	100	155	105	189	96	97	26.87	68	163.64	88	97.37	29.93	148.9	127.9	465	0.92	0.81	0.6	1	0.4	205.9	3	18.39	4.9	2	42.59	0	4.2328	1.44357	2.79695	0.774185	108.13	5.40464	0	1	0	1	0	0	0	187	7.09	181	0	0
2	35	130	80	120	70	125	75	147	45	75	20.82	53	170.37	56	77.4	69.26	141.7	38.51	156	1.51	0.64	4.16	2	0.33	6.9	1	12.05	8.1	4	22.75	0	4.40688	0.43465	2.41614	1.79152	93.408	4.29618	0	0	0	0	0	0	0	150	5.98	241	0	0
2	49	150	95	140	80	145	87.5	161	85	71	32.79	68	161.22	60	98.83	51.28	30.2	70.28	140	1.19	0.67	11.06	4	0.58	2	1	13.63	4.6	1	24.72	0	4.1702	0.793228	2.48019	1.32644	95.884	5.48568	0	0	0	1	0	0	0	130	9.23	329	0	0
2	23	110	80	100	70	105	75	168	38	57	13.46	91	153.45	63	89.04	56.69	69	42.4	204	1.23	0.62	5.37	3	0.26	100	3	17.07	4.7	1	19.61	0	3.96922	0.478555	2.2835	1.46637	88.28	4.94227	0	0	0	0	0	0	0	161	9.2	277	0	0
1	21	100	70	90	60	95	65	168	58	73	20.55	60	138.07	64	88.55	30.87	152.7	125.12	287	0.84	0.64	4.08	2	0.29	218.5	3	13.2	6.6	4	34.73	0	3.57139	1.41219	2.12561	0.7985	82.176	4.91508	0	1	0	0	0	0	0	177	7.05	361	0	0
2	20	140	80	130	70	135	75	159	50	67	19.78	68	139.11	58	82.47	55.86	679.6	60.28	325	1.22	0.58	5.03	3	0.04	1	1	16.23	7.7	4	23.99	0	3.59829	0.680361	1.84154	1.4449	71.194	4.5776	0	0	0	0	0	0	0	102	7.56	531	0	0
1	26	120	80	110	70	115	75	185	72	76	21.04	44	145.07	91	71.64	61.04	41.4	51.29	371	1.21	0.55	8.09	4	0.17	122.7	1	30.64	20.6	4	15.46	0	3.75246	0.578894	1.90823	1.57889	73.772	3.97647	0	0	0	0	0	1	0	173	6.53	190	0	0
1	37	130	90	120	80	125	85	184	63	72	18.61	69	159.55	94	102.27	40.41	99.4	111.13	306	1.02	0.71	5.75	4	0.29	117	1	18.53	4.4	1	38.9	0	4.127	1.25429	2.50683	1.04527	96.914	5.67662	0	0	0	0	0	1	0	171	7.81	131	0	0
1	29	110	75	100	65	105	70	170	59	78	20.42	58	177.99	75	96.57	32.05	151.1	362.16	335	1.03	0.61	2.28	1	0.44	600	4	14.95	6.7	4	33.45	0	4.60398	4.08758	1.9014	0.829022	73.508	5.36024	0	1	0	0	0	1	0	165	10.21	271	0	0
2	23	100	70	90	60	95	65	148	38	65	17.35	76	158.93	49	80.04	53.93	497.2	54.91	216	1.2	0.66	0.48	1	0.17	22.6	2	17.28	7.3	4	24.68	0	4.11097	0.619752	2.43192	1.39498	94.018	4.44272	0	0	0	0	0	0	0	149	8.27	231	0	0
2	33	110	80	100	70	105	75	158	41	62	16.42	63	171.41	64	102.37	64.4	120.5	115.76	299	1.6	0.59	4.54	2	0.53	36.9	2	15.3	5.4	2	21.8	0	4.43378	1.30655	2.16912	1.6658	83.858	5.68217	0	0	0	0	0	0	0	148	9	200	0	0
1	21	120	70	110	65	115	67.5	169	54	73	18.91	59	130.51	77	100.25	41.17	54.9	118.54	343	1.09	0.55	4.61	3	0.31	151.2	2	11.3	7.7	4	26.38	0	3.37584	1.33792	1.69767	1.06492	65.632	5.5645	0	0	0	0	0	1	0	168	6.79	220	0	0
2	22	110	80	100	70	105	75	150	42	62	18.67	60	121.22	60	82.16	53.68	21.9	36	184	1.1	0.45	5.67	4	0.21	20.6	2	12.75	4.6	1	12	0	3.13554	0.406321	1.56079	1.38852	60.34	4.56039	0	0	0	0	0	0	0	148	6.05	243	0	0
2	22	135	95	125	80	130	87.5	168	60	77	21.26	60	169.67	62	84.66	40.63	207.7	87.51	364	1.09	0.75	1.63	1	0.27	79.7	3	19.43	6.5	3	35.65	0	4.38877	0.987698	2.8851	1.05096	111.538	4.69916	0	0	0	0	0	0	0	148	5.26	276	0	0
2	32	120	80	110	70	115	75	163	54	74	20.32	58	119.77	47	84.7	45.54	46.9	37.95	220	1.08	0.53	1.34	1	0.61	6.4	1	11.66	6.9	3	16.36	0	3.09803	0.42833	1.72375	1.17796	66.64	4.70138	0	0	0	0	0	0	0	85	5.43	339	0	0
2	23	110	70	100	65	105	67.5	156	62	75	25.48	60	156.5	54	80.5	59.63	74.8	72.6	308	1.41	0.58	4.92	3	0.13	70.1	3	12.65	5.3	2	22.38	0	4.04811	0.819413	2.13011	1.54242	82.35	4.46825	0	0	0	0	0	0	0	152	8.05	320	0	0
2	51	140	90	130	80	135	85	153	66	75	28.19	60	187.28	59	93.45	64.61	100.1	91.12	282	1.49	0.71	7.29	4	0.42	127.4	4	14.18	11.7	4	30.38	0	4.84428	1.02844	2.70166	1.67124	104.446	5.18706	0	0	0	0	0	0	0	149	7.76	360	0	0
1	33	130	90	120	80	125	85	176	71	50	22.92	60	161.22	77	89.28	48.48	76.4	114.38	303	1.19	0.67	1.64	1	0.67	201.9	3	20.86	7	4	27.98	0	4.1702	1.29097	2.32447	1.25401	89.864	4.9556	0	0	0	0	0	0	0	176	5.3	145	0	0
2	33	120	80	110	70	115	75	156	48	73	19.72	60	141.88	58	78.76	50.14	105.5	61.02	250	1.21	0.6	2.38	1	0.25	162.6	4	14.84	6.1	3	20.73	0	3.66994	0.688713	2.05732	1.29695	79.536	4.37167	0	0	0	0	0	0	0	148	8.06	306	0	0
1	52	120	80	122	85	121	82.5	166	65	86	23.59	77	128.92	78	79.14	43.23	62.3	95.48	354	1.1	0.55	3.34	2	0.36	148	2	16.67	4.7	1	24.51	0	3.33471	1.07765	1.72256	1.11821	66.594	4.39276	0	0	0	0	0	0	0	178	8.09	248	0	0
[truncated: 2 more columns]
